# Supplementary material for: A data analysis framework for biomedical big data: Application on mesoderm differentiation of human pluripotent stem cells
Source: PLoS One. 2017 Jun 27;12(6):e0179613. doi: 10.1371/journal.pone.0179613 (PMC5487013; doi:10.1371/journal.pone.0179613)
Supplement: S4 File — Excel file containing enriched transcription factors for every cluster. (XLSX) [file pone.0179613.s004.xlsx]

## Sheet: Cluster 1
Term	Overlap	P-value	Adjusted P-value	Z-score	Combined Score	Genes
CBEPA (human)	10/1366	2.82977e-05	0.00631039	-1.7368	8.79784	C3;GLIPR1;CST1;LHX1;AMIGO2;BHLHE40;STMN2;GRHL3;ARHGAP24;CD177
JUN (human)	13/2976	0.000301374	0.0336032	-1.62308	5.50731	GPX2;GYPB;AMIGO2;GRHL3;PRDM1;ARHGAP24;GLIPR1;EGFLAM;SOX17;FAM184A;BHLHE40;TNFSF10;SAMD3
ETV4 (human)	8/1403	0.00105685	0.0785593	-1.71201	4.35517	AMIGO2;BHLHE40;WNT8A;ELMO1;HNF1B;PRDM1;C7ORF16;FOXA2
SRY (human)	4/469	0.00546999	0.0886004	-1.93251	4.68366	GPX2;CYP1B1;ARHGAP24;DLL3
GATA2 (human)	24/9985	0.00389554	0.0886004	-1.71192	4.14905	GPX2;GYPB;TNFRSF9;WNT8A;STMN2;GRHL3;PRDM1;PCDH19;NTS;SHISA6;DLL3;C3;GLIPR1;LOX;CCKBR;SOX17;TNFSF10;CLVS2;ELMO1;LRIG3;TRY6;PRSS2;SAMD3;FOXA2
NFIC (human)	14/4403	0.00390456	0.0886004	-1.66854	4.04391	PRSS1;GPX2;GRHL3;LYZ;ARHGAP24;C7ORF16;C3;CST2;EGFLAM;LOX;CCKBR;LHX1;ELMO1;SAMD3
TP63 (human)	7/1443	0.00548028	0.0886004	-1.62631	3.94156	GLIPR1;EGFLAM;LOX;WNT8A;ELMO1;LYZ;SAMD3
SAMD9L (human)	7/1415	0.00493115	0.0886004	-1.62502	3.93842	PRSS1;GLIPR1;CST1;FAM184A;SCGB1A1;ELMO1;CYP1B1
BCL6 (human)	7/1399	0.00463678	0.0886004	-1.58364	3.83814	GLIPR1;GPX2;ELMO1;PRDM1;TMPRSS11E;PCDH19;ARHGAP24
GATA6 (human)	7/1447	0.00556236	0.0886004	-1.56225	3.78631	PRSS1;SOX17;AMIGO2;TNFSF10;NTS;SAMD3;C7ORF16
SRF (human)	555505	0.00369518	0.0886004	-1.55791	3.77579	CST2;PRSS1;CST1;LOX;CCKBR;ELMO1;NRCAM;GRHL3;PRDM1;LYZ;ARHGAP24;C7ORF16
CBEPB (human)	255215	0.00449039	0.0886004	-1.55623	3.77172	PRSS1;EGFLAM;LOX;SOX17;GYPB;LRIG3;PRDM1;TMPRSS11E;LYZ;ARHGAP24
HINFP (human)	419239	0.00455394	0.0886004	-1.50521	3.64806	EGFLAM;LOX;SOX17;CLVS2;TNFSF10;CYP1B1;NRCAM;PRDM1;ARHGAP24;SAMD3;FOXA2
LEF1 (human)	15/4658	0.00233442	0.0886004	-1.45629	3.5295	PRSS1;STMN2;WNT8A;GRHL3;PRDM1;LYZ;PCDH19;NTS;ARHGAP24;DLL3;EGFLAM;ELMO1;LRIG3;NRCAM;SAMD3
FOXA2 (human)	30348	0.00728437	0.101526	-1.89291	4.32992	GYPB;GRHL3
STAT3 (human)	314018	0.00684942	0.101526	-1.42272	3.25439	GLIPR1;WNT8A;CYP1B1;LRIG3;NRCAM;HNF1B;GRHL3;TMPRSS11E;PCDH19;FOXA2
ETS1 (human)	14/4827	0.00896714	0.117628	-1.53077	3.27619	PRSS1;GPX2;GYPB;AMIGO2;WNT8A;GRHL3;ARHGAP24;EGFLAM;LOX;FAM184A;ANPEP;SCGB1A1;NRCAM;FOXA2
FOXO3A (mouse)	4/597	0.012454	0.154291	-1.64095	3.06679	LOX;AMIGO2;TNFSF10;PRDM1
FOXF1 (human)	6/1352	0.0153165	0.156176	-1.50749	2.79908	EGFLAM;TNFRSF9;SCGB1A1;ELMO1;WNT8A;NTS
STAT5B (human)	6/1379	0.0167316	0.156176	-1.47449	2.7378	C3;CLVS2;ELMO1;PRDM1;ARHGAP24;SAMD3
NFAT2 (human)	6/1376	0.01657	0.156176	-1.47346	2.73589	TNFRSF9;LRIG3;GRHL3;PRDM1;SAMD3;C7ORF16
ETS2 (human)	6/1341	0.0147649	0.156176	-1.46641	2.7228	PRSS1;LOX;TNFSF10;PRDM1;ARHGAP24;SAMD3
PPARG (human)	613914	0.0148666	0.156176	-1.35762	2.5208	C3;EGFLAM;TNFSF10;WNT8A;CYP1B1;HNF1B;GRHL3;PCDH19;LYZ;ARHGAP24;FOXA2
NFE2 (human)	285500	0.0168081	0.156176	-1.3413	2.49049	CST2;GYPB;TNFRSF9;BHLHE40;AMIGO2;ARHGAP24;SAMD3;CD177;FOXA2
POU2F1 (human)	6/1399	0.017837	0.159106	-1.43235	2.63292	CST1;TNFSF10;CLVS2;ELMO1;PRDM1;TMPRSS11E
E2F1 (human)	842950	0.0186751	0.160175	-1.24232	2.2753	PRSS1;LOX;LHX1;AMIGO2;BHLHE40;CYP1B1;GRHL3;LRIG3;PCDH19;ARHGAP24;DLL3;FOXA2
SND1 (human)	6/1473	0.0223686	0.184748	-1.37999	2.33047	ANPEP;BHLHE40;ELMO1;WNT8A;ARHGAP24;DLL3
ELF3 (human)	6/1488	0.0233749	0.186165	-1.38296	2.32493	PRSS1;GYPB;AMIGO2;TNFSF10;PRDM1;ARHGAP24
RUNX1 (human)	715086	0.0247849	0.190587	-1.22505	2.03071	CST2;PRSS1;GLIPR1;EGFLAM;LOX;CCKBR;CLVS2;NRCAM;GRHL3;ARHGAP24;SAMD3
TEAD1 (human)	6/1547	0.0276323	0.2054	-1.37471	2.17588	GLIPR1;EGFLAM;SOX17;GYPB;CLVS2;PCDH19
TEAD2 (mouse)	6/1591	0.0311273	0.223916	-1.35318	2.02501	EGFLAM;LOX;TNFRSF9;HNF1B;NRCAM;PRDM1
MAPK14 (human)	5/1190	0.0326492	0.227524	-1.38427	2.0494	CST2;FAM184A;TNFSF10;GRHL3;TMPRSS11E
FOXO3A (human)	4/813	0.0338233	0.228564	-1.44539	2.13331	TNFRSF9;SCGB1A1;TNFSF10;WNT8A
PRDM1 (mouse)	2/196	0.0357733	0.234631	-1.55205	2.25007	AMIGO2;LRIG3
PURA (human)	3/492	0.0381675	0.239636	-1.44667	2.06676	EGFLAM;PCDH19;CD177
CREB1 (mouse)	4/849	0.0386856	0.239636	-1.34509	1.92164	EGFLAM;SOX17;PRDM1;SHISA6
HIVEP1 (human)	2/218	0.043286	0.256691	-1.4983	2.03751	STMN2;WNT8A
TCF4 (human)	844016	0.0437411	0.256691	-1.03881	1.41266	C3;GPX2;EGFLAM;LOX;SOX17;GYPB;TNFSF10;ELMO1;TMPRSS11E;PCDH19;ARHGAP24
MZF1_1-4 (human)	294234	0.0466421	0.266697	-1.45385	1.92147	EGFLAM;LOX;FAM184A;LHX1;BHLHE40;SCGB1A1;CLVS2;ARHGAP24
GTF2I (human)	2/237	0.0502047	0.279891	-1.41585	1.80288	NRCAM;PRDM1
SREBF2 (human)	5/1361	0.0529148	0.281491	-1.24805	1.5821	C3;TNFSF10;NRCAM;DLL3;FOXA2
JUND (human)	5/1380	0.0555409	0.281491	-1.21795	1.54394	EGFLAM;LOX;STMN2;NRCAM;PRDM1
POU2F2 (human)	326011	0.0544781	0.281491	-1.12296	1.42352	TNFRSF9;STMN2;TNFSF10;ELMO1;HNF1B;PRDM1;TMPRSS11E;ARHGAP24
MEF2A (human)	328933	0.0552396	0.281491	-1.09656	1.39006	FAM184A;ANPEP;AMIGO2;LRIG3;PRDM1;TMPRSS11E;NTS;SAMD3
THRA (human)	2/271	0.0634953	0.288333	-1.27398	1.58437	FAM184A;ANPEP
POU1F1 (human)	5/1408	0.0595491	0.288333	-1.18428	1.47281	GYPB;NRCAM;TMPRSS11E;ARHGAP24;SAMD3
MYB (human)	5/1409	0.0596953	0.288333	-1.18423	1.47275	EGFLAM;GRHL3;PRDM1;NTS;SAMD3
RORB (mouse)	4/1020	0.0670435	0.288333	-1.13542	1.41206	PRSS1;BHLHE40;WNT8A;PRSS2
RUNX2 (human)	5/1458	0.0671163	0.288333	-1.13156	1.40725	TNFRSF9;SCGB1A1;GRHL3;LYZ;ARHGAP24
NR2F1 (mouse)	4/1021	0.0672347	0.288333	-1.12198	1.39534	PRSS1;BHLHE40;WNT8A;PRSS2
TP53 (human)	353039	0.0617905	0.288333	-1.02876	1.2794	PRSS1;GLIPR1;GPX2;LOX;SOX17;BHLHE40;PRDM1;SAMD3
HNRNPK (human)	15707	0.0641273	0.288333	-0.637427	0.792728	FOXA2
FOXC1 (human)	25/13142	0.0731245	0.302693	-1.15467	1.37987	PRSS1;GYPB;AMIGO2;STMN2;PRDM1;PCDH19;C7ORF16;C3;FAM184A;TNFSF10;NRCAM;TRY6;PRSS2;SAMD3;CD177;GPX2;HNF1B;GRHL3;LYZ;ARHGAP24;LOX;CCKBR;BHLHE40;ELMO1;FOXA2
NFKB1 (human)	583538	0.0732979	0.302693	-0.906136	1.08286	CCKBR;LHX1;ANPEP;BHLHE40;WNT8A;ELMO1;ARHGAP24;DLL3;FOXA2
HOXA5 (human)	401981	0.0765872	0.305506	-1.19649	1.41877	GPX2;CST1;LHX1;CLVS2;LRIG3;NRCAM;PCDH19;SAMD3
ATF2 (human)	5/1517	0.0767191	0.305506	-1.03112	1.22268	CST2;LRIG3;PRDM1;PCDH19;DLL3
CRTC1 (human)	4/1086	0.0802802	0.308663	-1.03247	1.21367	LHX1;NRCAM;TMPRSS11E;ARHGAP24
GATA3 (human)	221155	0.0789511	0.308663	-0.986717	1.15989	PRSS1;GYPB;STMN2;ELMO1;CLVS2;GRHL3;TRY6
EGR1 (human)	3/681	0.0832165	0.309288	-1.08316	1.27107	EGFLAM;HNF1B;PRDM1
IRF8 (human)	5/1550	0.0824058	0.309288	-0.994967	1.16758	CST1;LOX;AMIGO2;HNF1B;PCDH19
NFYA (human)	237226	0.0848976	0.310363	-0.893358	1.04524	PRSS1;EGFLAM;ELMO1;HNF1B;GRHL3;ARHGAP24;FOXA2
Nkx3-2 (mouse)	4/1122	0.0880191	0.312197	-1.07716	1.25395	GLIPR1;PRDM1;PCDH19;CD177
SP3 (mouse)	4/1129	0.0895654	0.312197	-0.963358	1.12146	FAM184A;GRHL3;PRDM1;SHISA6
NR3C1 (human)	5/1590	0.0895992	0.312197	-0.888199	1.03397	CST2;GPX2;CST1;EGFLAM;ELMO1
Esrrb (mouse)	23743	0.0946674	0.324782	-0.590258	0.663805	AMIGO2
IKZF1 (mouse)	5/1674	0.105757	0.35733	-0.836174	0.860504	LHX1;TNFRSF9;TNFSF10;CYP1B1;ARHGAP24
NR5A2 (human)	699684	0.112024	0.372858	-0.707047	0.697544	CST2;GLIPR1;EGFLAM;FAM184A;SCGB1A1;WNT8A;TNFSF10;NRCAM;ARHGAP24
POU2F1 (mouse)	5/1735	0.118358	0.375182	-0.835271	0.818852	GLIPR1;CLVS2;CYP1B1;HNF1B;SAMD3
LEF1 (mouse)	5/1730	0.117298	0.375182	-0.819595	0.803484	CCKBR;TNFRSF9;BHLHE40;TNFSF10;NTS
NR5A2 (mouse)	5/1748	0.121135	0.375182	-0.807415	0.791543	CCKBR;ANPEP;WNT8A;ARHGAP24;FOXA2
RBPJ (mouse)	5/1735	0.118358	0.375182	-0.800412	0.784679	C3;TNFRSF9;SCGB1A1;CYP1B1;GRHL3
HMGA1 (mouse)	5/1748	0.121135	0.375182	-0.78102	0.765668	TNFRSF9;NRCAM;PCDH19;TMPRSS11E;SAMD3
Stat3 (mouse)	5/1762	0.124161	0.379287	-0.760278	0.737061	C3;GPX2;NTS;PRSS2;ARHGAP24
IRF8 (mouse)	5/1770	0.125907	0.379421	-0.73982	0.716966	GPX2;GLIPR1;TNFSF10;NTS;FOXA2
SND1 (mouse)	32874	0.128192	0.381158	-0.574961	0.554575	TNFRSF9
Sox2 (mouse)	5/1797	0.131884	0.386976	-0.766129	0.727358	FAM184A;CLVS2;LRIG3;NTS;ARHGAP24
FOXL1 (human)	1408346	0.141153	0.408794	-0.876136	0.783743	CCKBR;SOX17;GYPB;SCGB1A1;STMN2;LRIG3;PRDM1;LYZ;NTS;SAMD3;DLL3;SHISA6
CACYBP (human)	4/1350	0.144868	0.409769	-0.773861	0.690408	CYP1B1;NRCAM;FOXA2;CD177
HNF1A (human)	5/1855	0.145165	0.409769	-0.711568	0.634833	GLIPR1;GPX2;GRHL3;ARHGAP24;C7ORF16
LTF (human)	4/1363	0.148482	0.413892	-0.730323	0.644254	GYPB;BHLHE40;PRDM1;SAMD3
RARA (human)	4/1379	0.152978	0.416026	-0.73526	0.644828	EGFLAM;SCGB1A1;LYZ;ARHGAP24
GABPA (human)	1/108	0.151576	0.416026	-0.553832	0.485715	ARHGAP24
FOS (human)	4/1394	0.157242	0.417441	-0.708937	0.619336	AMIGO2;PRDM1;ARHGAP24;SAMD3
MZF1 (human)	4/1389	0.155816	0.417441	-0.690401	0.603142	EGFLAM;NRCAM;HNF1B;FOXA2
CEBPB (human)	4/1420	0.164742	0.432206	-0.676282	0.567301	AMIGO2;BHLHE40;TNFSF10;PRDM1
FOXA1 (human)	4/1457	0.175642	0.455444	-0.676657	0.532179	TNFRSF9;SCGB1A1;WNT8A;LRIG3
ZFHX3 (human)	4/1504	0.18985	0.472771	-0.639519	0.479092	EGFLAM;CLVS2;NRCAM;NTS
MIR133B (human)	4/1500	0.188625	0.472771	-0.637436	0.477531	GPX2;ELMO1;PCDH19;FOXA2
MIB2 (human)	4/1490	0.185577	0.472771	-0.589342	0.441503	GPX2;FAM184A;SCGB1A1;HNF1B
SREBF1 (human)	251075	0.190804	0.472771	-0.507384	0.380104	LOX;BHLHE40;CYP1B1;LRIG3;HNF1B;LYZ
RORB (human)	3/1035	0.204368	0.49107	-0.655824	0.466402	FAM184A;ANPEP;ELMO1
SMAD4 (human)	4/1542	0.201611	0.49107	-0.619204	0.440358	C3;ANPEP;AMIGO2;NRCAM
USF2 (human)	691254	0.204796	0.49107	-0.37013	0.263225	CST2;PRSS1;EGFLAM;CCKBR;LHX1;BHLHE40;LRIG3;C7ORF16
ZBTB16 (human)	4/1572	0.211057	0.5007	-0.559127	0.386775	CST2;CLVS2;NRCAM;PRDM1
NR2F1 (human)	3/1073	0.219285	0.50941	-0.627638	0.423343	FAM184A;ANPEP;ELMO1
Klf4 (mouse)	1/163	0.219298	0.50941	-0.576361	0.388757	SCGB1A1
FEV (human)	1/172	0.229865	0.52324	-0.65925	0.427006	SCGB1A1
SPI1 (human)	4/1638	0.232291	0.52324	-0.552307	0.357737	ANPEP;AMIGO2;WNT8A;HNF1B
CREB1 (human)	310244	0.230025	0.52324	-0.384545	0.249075	CST1;FAM184A;ELMO1;PRDM1;PCDH19;LYZ
Prrx2 (mouse)	111521	0.236318	0.52699	-0.543122	0.34791	LOX;TNFRSF9;NRCAM;SAMD3;ARHGAP24
STAT1 (human)	4/1667	0.241797	0.532241	-0.426093	0.268719	C3;GLIPR1;PRDM1;FOXA2
MYOD1 (mouse)	4/1672	0.243447	0.532241	-0.391049	0.246618	C3;CCKBR;BHLHE40;DLL3
SPI1 (mouse)	4/1680	0.246091	0.532799	-0.379291	0.238806	SCGB1A1;HNF1B;PCDH19;SAMD3
FOXA3 (human)	1/207	0.269648	0.573378	-0.518509	0.2884	CD177
EIF4EBP1 (human)	1/212	0.275165	0.573378	-0.442201	0.245957	PCDH19
POU2F2 (mouse)	4/1754	0.270865	0.573378	-0.36859	0.205013	CLVS2;TNFSF10;HNF1B;PRSS2
JUND (mouse)	4/1764	0.274252	0.573378	-0.363982	0.20245	C3;EGFLAM;CYP1B1;PRDM1
PITX2 (human)	594798	0.27769	0.573378	-0.18563	0.103249	EGFLAM;AMIGO2;WNT8A;GRHL3;LYZ;NTS;ARHGAP24
FOXI1 (human)	1/217	0.280642	0.574157	-0.506472	0.281017	EGFLAM
BRCA1 (human)	4/1809	0.289592	0.587082	-0.521794	0.277903	CST2;ELMO1;NRCAM;GRHL3
TFAP2A (human)	625844	0.29865	0.59999	-0.333027	0.170125	CST1;LOX;BHLHE40;CYP1B1;HNF1B;GRHL3;SAMD3
LOC135440 (human)	1/247	0.312661	0.612912	-0.379969	0.186007	CYP1B1
ARNT (human)	3/1303	0.313327	0.612912	-0.365574	0.178961	BHLHE40;DLL3;FOXA2
E2F1 (mouse)	422374	0.310779	0.612912	-0.165575	0.0810543	SOX17;LHX1;AMIGO2;NRCAM;SHISA6;FOXA2
SPIB (human)	2/760	0.318538	0.617687	-0.506606	0.244069	WNT8A;SHISA6
TFAP2D (human)	3/1324	0.322087	0.619185	-0.293933	0.140897	EGFLAM;SCGB1A1;WNT8A
CBFB (human)	2/774	0.326324	0.621968	-0.373525	0.177375	GLIPR1;NRCAM
MIR138 (human)	3/1356	0.335449	0.630179	-0.28259	0.130486	C3;GPX2;ELMO1
E2F6 (human)	3/1358	0.336284	0.630179	-0.218302	0.100801	GPX2;LOX;FOXA2
ZNF354C (human)	3/1430	0.366328	0.630892	-0.322295	0.148456	FAM184A;TNFRSF9;FOXA2
NR1I2 (human)	3/1387	0.348394	0.630892	-0.249536	0.114941	EGFLAM;ANPEP;CYP1B1
KLF11 (human)	3/1388	0.348812	0.630892	-0.209056	0.0962953	CST1;BHLHE40;GRHL3
NR5A1 (human)	3/1389	0.349229	0.630892	-0.192045	0.0884598	GPX2;FAM184A;LRIG3
TCF3 (human)	3/1428	0.365495	0.630892	-0.185205	0.0853092	CST2;EGFLAM;WNT8A
IRF2 (human)	3/1412	0.358826	0.630892	-0.180441	0.0831149	C3;WNT8A;TMPRSS11E
MYOG (human)	3/1404	0.355489	0.630892	-0.180117	0.0829656	CST1;EGFLAM;ARHGAP24
SNAI1 (human)	3/1428	0.365495	0.630892	-0.172623	0.0795135	CST2;EGFLAM;WNT8A
SNAI2 (human)	3/1428	0.365495	0.630892	-0.15922	0.0733398	CST2;EGFLAM;WNT8A
KLF13 (human)	3/1453	0.375898	0.630892	-0.0758399	0.0349334	EGFLAM;BHLHE40;PRDM1
PRDM1 (human)	3/1468	0.382128	0.630892	-0.0686905	0.0316402	PRSS1;EGFLAM;TMPRSS11E
RELB (human)	3/1469	0.382543	0.630892	-0.0436725	0.0201164	LOX;GRHL3;PCDH19
FOXJ1 (human)	3/1484	0.388761	0.630892	-0.0338621	0.0155976	CST1;LOX;ANPEP
TEAD2 (human)	3/1486	0.38959	0.630892	-0.00517253	0.00238257	ELMO1;PRDM1;FOXA2
JDP2 (human)	3/1488	0.390418	0.630892	-0.00262628	0.00120972	EGFLAM;ELMO1;LRIG3
KLF4 (human)	3/1485	0.389176	0.630892	0.0129609	-0.00597003	CST1;BHLHE40;GRHL3
GATA1 (human)	284646	0.378524	0.630892	0.0248719	-0.0114565	PRSS1;EGFLAM;CLVS2;PCDH19;C7ORF16
CBEPB (mouse)	502362	0.371557	0.630892	0.0330582	-0.0152273	PRSS1;TNFRSF9;STMN2;GRHL3;NTS;PRSS2
NFKB1 (mouse)	505650	0.374084	0.630892	0.122795	-0.0565616	C3;TNFRSF9;AMIGO2;SCGB1A1;ARHGAP24;CD177
Pdx1 (mouse)	2/907	0.398958	0.63317	-0.155384	0.0710128	ARHGAP24;SAMD3
ELK1 (human)	3/1511	0.399923	0.63317	0.0329179	-0.015044	PCDH19;NTS;SAMD3
HNF4A (human)	83002	0.400345	0.63317	0.117089	-0.0535115	GPX2;EGFLAM;WNT8A;LYZ
SMARCA2 (human)	3/1536	0.410217	0.639709	0.0414857	-0.0185334	AMIGO2;PCDH19;DLL3
RBPJ (human)	3/1535	0.409806	0.639709	0.0540349	-0.0241396	PRSS1;GPX2;LOX
SMAD4 (mouse)	3/1580	0.428219	0.658571	0.143281	-0.0598463	GRHL3;ARHGAP24;SHISA6
YY1 (human)	1513110	0.427121	0.658571	0.16603	-0.069348	LOX;GYPB;STMN2;NRCAM;GRHL3;TMPRSS11E;TRY6;PRSS2;ARHGAP24;SAMD3
ZNF148 (human)	3/1591	0.432693	0.660895	0.127688	-0.0528834	BHLHE40;GRHL3;DLL3
EGR1 (mouse)	3/1617	0.443225	0.672376	0.174053	-0.0690885	HNF1B;LRIG3;SHISA6
TBX5 (mouse)	3/1663	0.461689	0.690984	0.188532	-0.0696889	GPX2;LOX;DLL3
RELA (mouse)	3/1656	0.458894	0.690984	0.195585	-0.0722958	GLIPR1;PCDH19;FOXA2
IRF2 (mouse)	3/1706	0.478732	0.703505	0.196578	-0.0691327	PRSS1;TNFRSF9;PCDH19
MYC (mouse)	3/1699	0.475972	0.703505	0.209183	-0.0735658	BHLHE40;ELMO1;LRIG3
FOS (mouse)	3/1708	0.479519	0.703505	0.247078	-0.0868925	C3;CLVS2;NTS
SOX10 (mouse)	1/451	0.496346	0.705465	0.0740096	-0.0258218	GPX2
AHR (mouse)	1/454	0.498652	0.705465	0.0819821	-0.0286034	CYP1B1
HNF4A (mouse)	1/461	0.503994	0.705465	0.118914	-0.041489	TNFSF10
HIF1A (mouse)	2/1124	0.509327	0.705465	0.247236	-0.0862601	PCDH19;SAMD3
STAT5B (mouse)	3/1729	0.487754	0.705465	0.259068	-0.0903884	SCGB1A1;CYP1B1;PRDM1
REL (mouse)	3/1752	0.496707	0.705465	0.277279	-0.0967422	C3;GPX2;PRSS1
POU1F1 (mouse)	3/1754	0.497482	0.705465	0.285377	-0.0995675	PRSS1;FAM184A;WNT8A
SRF (mouse)	3/1782	0.508276	0.705465	0.321744	-0.112256	CLVS2;NTS;SAMD3
ETV4 (mouse)	3/1773	0.504819	0.705465	0.325389	-0.113528	WNT8A;PRSS2;DLL3
NR1H2 (human)	1/479	0.517476	0.707957	0.168706	-0.0582662	ELMO1
NFATC3 (mouse)	3/1801	0.515537	0.707957	0.368091	-0.127128	C3;ARHGAP24;CD177
Sox17 (mouse)	1/500	0.532752	0.724413	0.156868	-0.0505731	ANPEP
Gata1 (mouse)	3/1863	0.538857	0.728274	0.421893	-0.133773	LOX;HNF1B;PCDH19
USF1 (mouse)	2/1219	0.553545	0.739165	0.358565	-0.108371	GLIPR1;SOX17
Myb (mouse)	791	0.553218	0.739165	0.400495	-0.121043	LHX1;AMIGO2;HNF1B
MYC (human)	2/1302	0.589922	0.783052	0.363131	-0.0888061	BHLHE40;LRIG3
SP3 (human)	2/1332	0.602542	0.788462	0.383058	-0.0910417	BHLHE40;CYP1B1
PCBP1 (human)	2/1360	0.614065	0.788462	0.399604	-0.0949742	BHLHE40;CYP1B1
CREM (human)	1/662	0.635749	0.788462	0.407471	-0.096844	AMIGO2
TCFAP2A (human)	2/1367	0.616907	0.788462	0.426419	-0.101347	ANPEP;BHLHE40
APEX1 (human)	2/1373	0.619331	0.788462	0.43418	-0.103192	CYP1B1;LYZ
TEAD4 (human)	2/1354	0.611616	0.788462	0.443944	-0.105512	BHLHE40;NRCAM
HMGA1 (human)	2/1379	0.621743	0.788462	0.451699	-0.107356	TNFSF10;NTS
AHR (human)	2/1391	0.626535	0.788462	0.460116	-0.109356	LRIG3;DLL3
ZBTB7A (human)	2/1373	0.619331	0.788462	0.469091	-0.111489	ANPEP;FOXA2
NR1H3 (human)	2/1385	0.624145	0.788462	0.471388	-0.112035	EGFLAM;ARHGAP24
SP1 (human)	2/1406	0.63246	0.788462	0.49561	-0.117792	BHLHE40;CYP1B1
MTF1 (human)	2/1440	0.64563	0.788462	0.519521	-0.123475	EGFLAM;CYP1B1
USF1 (human)	2/1441	0.646012	0.788462	0.537507	-0.12775	BHLHE40;LRIG3
FOXA2 (mouse)	2/1441	0.646012	0.788462	0.573367	-0.136273	ANPEP;CD177
ELK4 (human)	2/1453	0.65057	0.788462	0.587307	-0.139586	EGFLAM;LHX1
PGR (human)	2/1447	0.648296	0.788462	0.590231	-0.140281	ELMO1;GRHL3
UBTF (human)	2/1493	0.66544	0.802125	0.603906	-0.133156	GRHL3;PCDH19
Sox5 (mouse)	1/728	0.67103	0.804515	0.444045	-0.096587	ARHGAP24
HOXD9 (human)	2/1543	0.683333	0.814884	0.654472	-0.133977	ANPEP;LRIG3
SP1 (mouse)	168073	0.701604	0.832221	0.75069	-0.137869	BHLHE40;AMIGO2;SHISA6
FOXA1 (mouse)	2/1705	0.736148	0.8441	0.710583	-0.120433	TNFSF10;NRCAM
CACYBP (mouse)	2/1656	0.720987	0.8441	0.715157	-0.121208	ANPEP;CD177
TFAP2A (mouse)	2/1663	0.723196	0.8441	0.72744	-0.12329	TNFRSF9;CLVS2
ETS1 (mouse)	2/1681	0.728809	0.8441	0.73383	-0.124373	GLIPR1;AMIGO2
SREBF1 (mouse)	2/1735	0.745093	0.8441	0.74074	-0.125544	TNFRSF9;STMN2
NFYB (mouse)	2/1748	0.74889	0.8441	0.740761	-0.125548	TNFRSF9;STMN2
NFYA (mouse)	2/1748	0.74889	0.8441	0.759678	-0.128754	TNFRSF9;STMN2
CPEB1 (mouse)	2/1748	0.74889	0.8441	0.76771	-0.130115	TNFRSF9;STMN2
RUNX2 (mouse)	2/1750	0.74947	0.8441	0.829356	-0.140563	CCKBR;ELMO1
TBP (human)	214094	0.73549	0.8441	0.848072	-0.143735	GYPB;NTS;FOXA2
CBEPA (mouse)	2/1764	0.753499	0.844373	0.793352	-0.134204	TMPRSS11E;PRSS2
En1 (mouse)	1/957	0.769429	0.857914	0.6897	-0.105698	WNT8A
ARID3A (mouse)	2/1893	0.78814	0.86895	0.750095	-0.105366	TNFRSF9;SAMD3
NR5A1 (mouse)	1/1020	0.791017	0.86895	0.776432	-0.109065	PCDH19
WT1 (human)	288238	0.783863	0.86895	0.969608	-0.136201	GLIPR1;NRCAM;FOXA2
MAX (human)	12451	0.798247	0.872561	0.87499	-0.119281	BHLHE40;LRIG3
RELA (human)	319648	0.80213	0.872561	1.0057	-0.1371	FAM184A;LRIG3;PCDH19
THRB (human)	48976	0.821181	0.888948	0.912632	-0.107432	CST2;AMIGO2
TP53 (mouse)	1/1266	0.857951	0.924266	0.874693	-0.0688866	TNFRSF9
NFIA (human)	1/1416	0.887943	0.925146	0.906992	-0.0705675	GRHL3
GFI1 (human)	1/1427	0.889881	0.925146	0.909213	-0.0707402	WNT8A
Pax2 (mouse)	1/1516	0.904403	0.925146	0.910388	-0.0708317	CCKBR
FOXF2 (human)	1/1379	0.881178	0.925146	0.918189	-0.0714386	WNT8A
PITX1 (human)	1/1448	0.893491	0.925146	0.950394	-0.0739443	DLL3
REPIN1 (human)	1/1466	0.896492	0.925146	0.968238	-0.0753326	GPX2
GLI2 (human)	1/1465	0.896327	0.925146	0.974285	-0.075803	CLVS2
CEBPD (human)	1/1495	0.901155	0.925146	0.999632	-0.0777751	C3
ESR1 (human)	1/1513	0.903945	0.925146	1.03034	-0.080164	C3
TFAP2C (human)	1/1485	0.899571	0.925146	1.04645	-0.0814177	SCGB1A1
TBP (mouse)	468302	0.872366	0.925146	1.04708	-0.0814671	STMN2;NTS;TMPRSS11E
NRF1 (mouse)	1/1676	0.925952	0.935962	1.09794	-0.0726629	NRCAM
MYOG (mouse)	1/1675	0.925833	0.935962	1.13155	-0.0748867	EGFLAM
JUN (mouse)	1/1699	0.928631	0.935962	1.13343	-0.0750115	SCGB1A1
ELK1 (mouse)	1/1727	0.931764	0.935962	1.1335	-0.0750157	DLL3
NR3C1 (mouse)	1/1775	0.936827	0.936827	1.08797	-0.0709974	CLVS2

## Sheet: Cluster 2
Term	Overlap	P-value	Adjusted P-value	Z-score	Combined Score	Genes
FOXC1 (human)	131/13142	2.18848e-10	5.75569e-08	-1.83769	30.6352	GUCY1B3;DENND5B;PROS1;DPY19L2P2;GXYLT2;CLGN;SESN3;ARHGDIB;KIFAP3;SOX5;CCBE1;SLC6A16;ARID5B;WDR78;HCFC2;TANC2;C20ORF132;PYGO1;TANC1;INPP4B;FRMD6;MAP1A;PRKD1;RIN2;FREM2;DGKI;DLX5;CTTNBP2;CCDC146;TRANK1;C7ORF58;KIAA1370;PLD1;C11ORF9;DDX26B;ST3GAL6;HMGCLL1;ST3GAL1;GTF2IRD2B;ABCA1;ZNF781;FER1L4;JAG1;FZD4;SIAH3;CNTN6;LHFP;GTF2IRD2;ST8SIA1;PLK2;WDR52;SMAD9;LRP1B;BAMBI;ACCN2;NOSTRIN;CYP1A1;CPE;RGL1;MAP3K…
POU2F2 (human)	44/2792	7.28187e-08	8.08795e-06	-1.64098	19.2407	CTTNBP2;SEMA3D;GBE1;PROS1;NEDD9;AFF3;CXXC4;RERG;CLGN;CTSO;SESN3;LRRTM3;NETO1;FRZB;KIFAP3;ADAMTS6;GBP4;SOX5;NTRK2;PRRX1;SIAH3;ST8SIA1;KCNJ13;AKR1C1;TET2;SMAD9;SULF1;DLK1;LRP1B;FRMD6;DPY19L2;DOK4;MMP15;ASXL3;DOK6;COL5A2;ERP27;CNTN4;KCTD12;RGL1;PPP1R12B;MAP3K13;CAMK1G;F2RL2
TCF4 (human)	57/4210	9.2258e-08	8.08795e-06	-1.49538	17.5336	ROBO2;AMY2B;PROS1;TCF21;AFF3;ARHGAP6;LYST;CLGN;GHR;CTSO;LBH;RNF150;C9ORF150;KIFAP3;BBS5;SOX5;EDN1;SLC6A16;TNFRSF19;MUM1L1;TET2;EMP2;INPP4B;MMP15;PAPPA;DOK6;MAP1A;HOXB3;PPP1R12B;GLT25D2;CTTNBP2;DLX5;SEMA3D;TRANK1;FIGNL2;NEDD9;PTN;MLLT3;PLAGL1;HMGCLL1;CAP2;ZNF781;SVIL;JAG1;SIAH3;CNTN6;ST8SIA1;ODAM;KCNJ13;WDR52;SULF1;LRP1B;SH3RF2;ASXL3;NOSTRIN;CPE;RGL1
POU1F1 (human)	28/1408	3.33001e-07	2.18948e-05	-1.70715	18.3165	CTTNBP2;AMY2B;CAB39L;SEMA3D;CLGN;ARHGDIB;SPOCK3;SLITRK6;KIFAP3;GBP4;SOX5;NIPSNAP3A;SIAH3;ODAM;TNFRSF19;PLCL2;WDR52;ARID5B;TANC2;CDC20B;DNAJC6;DOK6;ST7;CPE;ATG4A;RGL1;PPP1R12B;F2RL2
HMGA1 (human)	26/1379	2.40682e-06	9.04277e-05	-1.68782	15.7152	CTTNBP2;NEDD9;RCSD1;PLD1;MLLT3;ARHGAP6;LRRTM3;SPTLC3;SLITRK6;KIFAP3;CAP2;LHFP;ODAM;CNTN6;KCNJ13;PLCL2;MUM1L1;TET2;TANC2;TANC1;PAPPA;MGP;COL5A2;HOXB3;ERP27;PPP1R12B
NFAT2 (human)	26/1376	2.31502e-06	9.04277e-05	-1.67495	15.5954	CTTNBP2;SEMA3D;GBE1;TCF21;PLD1;FRZB;SPOCK3;C9ORF150;KIFAP3;ADAMTS6;ODAM;CNTN6;HEG1;PLK2;KCNJ13;PLCL2;TET2;WDR52;LRP1B;MGP;COL5A2;CPE;ATG4A;KCNQ5;PPP1R12B;RIN2
HINFP (human)	43/3047	2.04811e-06	9.04277e-05	-1.55718	14.4989	DLX5;AMY2B;RGS13;PTN;AFF3;LYST;GLI3;LBH;DACH1;NETO1;SPTLC3;FRZB;SPOCK3;SLITRK6;DNAJC5G;RNF150;C9ORF150;GPR155;GBP4;NTRK2;IL1R1;FZD4;ODAM;ADHFE1;KCNJ13;TNFRSF19;WDR52;ZHX1;DLK1;CDC20B;TANC1;FRMD6;DPY19L2;DOK4;MMP15;ZADH2;KIF26B;ASXL3;CYP1A1;ATG4A;RGL1;RIN2;FREM2
LEF1 (human)	56/4658	5.68428e-06	0.000186871	-1.40414	12.0547	ROBO2;CLSTN2;GBE1;TCF21;RCSD1;AFF3;RERG;CLGN;GHR;DACH1;SESN3;ARHGDIB;BOC;C9ORF150;KIFAP3;SOX5;MUM1L1;TNFRSF19;TET2;TANC1;INPP4B;RIN2;SEMA3D;RGS13;NEDD9;PTN;MLLT3;C11ORF9;CACNA1G;DDX26B;SPOCK3;NAALAD2;DNAJC5G;SLC17A8;GPR155;ABCA1;JAG1;NIPSNAP3A;GTF2IRD2;LHFP;KCNJ13;PLCL2;WDR52;SULF1;LRP1B;SH3RF2;ACCN2;ST7;NOSTRIN;PMP22;CPE;CNTN4;F2RL2;CPEB4;PPIL6;YPEL2
STAT5B (human)	24/1379	2.22322e-05	0.000649674	-1.65311	12.1323	ROBO2;NIPSNAP3A;GTF2IRD2;DOCK9;RGS13;PROS1;KCNJ13;TNFRSF19;TET2;EMP2;TANC2;FRMD6;ZADH2;DOK6;BOC;NOSTRIN;DNAJC5G;RGL1;KIFAP3;PPP1R12B;GTF2IRD2B;F2RL2;ADAMTS6;CAP2
SPI1 (mouse)	27/1680	2.61014e-05	0.000686468	-1.55296	11.3117	GLT25D2;GUCY1B3;TCF21;AFF3;CXXC4;CACNA1G;FRZB;ST3GAL1;BBS5;GBP4;CCBE1;PRRX1;GTF2IRD2;ST8SIA1;MUM1L1;TET2;SULF1;TANC2;DOK4;PAPPA;COL5A2;CYP1A1;GPR126;CCDC3;RIN2;CAMK1G;CPEB4
SP3 (mouse)	21/1129	2.95101e-05	0.000705561	-1.62343	11.7804	CCBE1;NEDD9;KCNA5;SULF1;DLK1;CACNA1G;GHR;PYGO1;TANC1;DACH1;NETO1;SYT10;MGP;SPOCK3;CPE;NAALAD2;CCDC3;IL6ST;GPR155;BBS5;DGKI
HNF1A (human)	26/1855	0.000325212	0.00712756	-1.57122	7.76776	GLT25D2;CAB39L;FIGNL2;NEDD9;ARHGAP6;LTBP1;RERG;NETO1;FRZB;PLAGL1;GPR155;BBS5;SOX5;SVIL;CNTN6;ODAM;ADHFE1;KCNJ13;MUM1L1;ASXL3;NOSTRIN;CCDC3;KCTD12;MAP3K13;PPP1R12B;DGKI
MAPK14 (human)	19/1190	0.000482109	0.00975344	-1.62518	7.52481	CAB39L;PLCL2;TNFRSF19;PROX1;AFF3;CLGN;INPP4B;FRZB;MGP;SPOCK3;NOSTRIN;PMP22;HOXB3;TCP11L2;KIFAP3;PPP1R12B;HMGCLL1;GPR155;SOX5
LEF1 (mouse)	24/1730	0.000647122	0.0121567	-1.5087	6.6532	PRRX1;CLSTN2;FZD4;SIAH3;CNTN6;PROS1;CCDC146;WDR52;NEDD9;PLD1;HCFC2;ARHGAP6;DACH1;CSRP1;NETO1;SPTLC3;SYT10;PMP22;CYP1A1;CPE;GPR126;PRKD1;CAP2;SOX5
GATA6 (human)	21/1447	0.000821511	0.0143684	-1.54972	6.57502	NIPSNAP3A;RGS13;PLCL2;MUM1L1;ARID5B;C7ORF58;AFF3;SH3RF2;FRMD6;SESN3;LRRTM3;SPTLC3;MGP;COL5A2;ST3GAL6;KCTD12;KIFAP3;F2RL2;GBP4;CPEB4;SULT1C4
ETS1 (human)	50/4827	0.000874123	0.0143684	-1.54377	6.54977	ROBO2;GBE1;PROS1;SNORD115-11;RCSD1;GHR;LBH;LRRTM3;CSRP1;BOC;TCP11L2;KIFAP3;YAF2;SULT1C4;PRKCH;IL1R1;TAS2R10;TET2;ARID5B;EMP2;ZHX1;ZADH2;MMP15;PPP1R12B;ACPP;DGKI;CTTNBP2;SEMA3D;CCDC146;NEDD9;KCNA5;PTN;PLD1;FRZB;PLAGL1;SNORD115-26;GTF2IRD2B;CAP2;SVIL;NIPSNAP3A;PRRX1;FZD4;GTF2IRD2;SIAH3;ST8SIA1;LHFP;PLCL2;ACCN2;MGP;PMP22
POU2F1 (human)	20/1399	0.00130932	0.0181238	-1.50867	6.05056	SIAH3;ADHFE1;PROS1;AKR1C1;CXXC4;DLK1;SESN3;NETO1;DOK4;MMP15;ASXL3;DDX26B;DOK6;MAP1A;C9ORF150;KCTD12;RGL1;PPP1R12B;FREM2;SOX5
BCL6 (human)	20/1399	0.00130932	0.0181238	-1.48208	5.94394	ROBO2;NTRK2;PRKCH;GTF2IRD2;AMY2B;GBE1;AKR1C1;CCDC146;TNFRSF19;PLCL2;AFF3;ZHX1;DACH1;DOK6;COL5A2;NAALAD2;C9ORF150;RGL1;KIFAP3;F2RL2
SRF (human)	38/3420	0.00124308	0.0181238	-1.39982	5.61402	DLX5;DGKB;AMY2B;SEMA3D;NEDD9;C7ORF58;PTN;ADAMTS12;PLD1;ARHGAP6;LTBP1;CACNA1G;LBH;SESN3;NETO1;KIAA1324;ZNF503;GPR155;CAP2;SVIL;SIAH3;PLK2;AKR1C1;WDR52;ARID5B;PLEKHA6;SULF1;CDC20B;DPY19L2;FRMD6;DNAJC6;ST7;NOSTRIN;PMP22;PRKD1;FREM2;DGKI;FBN1
MYB (human)	20/1409	0.00142327	0.018716	-1.51724	6.03615	ODAM;CAB39L;RGS13;ADHFE1;GBE1;SULF1;TANC2;DPY19L2;DNAJC6;ST7;COL5A2;SLITRK6;C9ORF150;KIFAP3;F2RL2;GBP4;CAP2;YPEL2;SOX5;SULT1C4
RBPJ (mouse)	23/1735	0.00152348	0.0190798	-1.42329	5.63499	EDN1;NIPSNAP3A;JAG1;SLC30A3;PLK2;PLCL2;RFTN1;TNFRSF19;LTBP1;CXXC4;TANC2;FRMD6;LBH;CSRP1;ZADH2;FRZB;TCP11L2;HOXB3;LCP1;MAP3K13;RGL1;GPR155;FBN1
E2F1 (human)	44/4207	0.00161812	0.0193439	-1.29504	5.10941	ROBO2;GLT25D2;BNC1;DOCK9;DENND5B;RCSD1;AFF3;ARHGAP6;GLI3;CACNA1G;LRRTM3;NETO1;PLAGL1;ZNF503;ST3GAL6;KIFAP3;HMGCLL1;GPR155;ADAMTS6;SOX5;NTRK2;SVIL;GTF2IRD2;SLC6A16;PLCL2;TNFRSF19;SMAD9;ARID5B;PROX1;WDR78;ZHX1;DLK1;CDC20B;SH3RF2;INPP4B;TANC1;KIF26B;DOK6;CYP1A1;KCTD12;IL6ST;MAP3K13;RGL1;FBN1
PGR (human)	20/1447	0.00193696	0.0219713	-1.46185	5.58139	AMY2B;PROS1;KCNJ13;AKR1C1;MUM1L1;NEDD9;C7ORF58;ADAMTS12;MLLT3;LTBP1;LRRTM3;PLAGL1;COL5A2;PMP22;ERP27;LCP1;KCTD12;KIFAP3;RIN2;SOX5
ETV4 (mouse)	23/1773	0.00200498	0.0219713	-1.35753	5.18307	NXPH2;CTTNBP2;GTF2IRD2;CAB39L;IL1R1;LHFP;SEMA3D;PROS1;ADHFE1;KCNJ13;TET2;CXXC4;LTBP1;SH3RF2;CSRP1;ARHGDIB;BOC;ST3GAL6;KCNQ5;RNF150;RIN2;ADAMTS6;CPEB4
PRDM1 (human)	20/1468	0.00228311	0.0240183	-1.43395	5.34713	NTRK2;SEMA3D;GBE1;PROS1;CCDC146;KCNA5;ZHX1;C20ORF132;CTSO;DDX26B;SLITRK6;TCP11L2;DNAJC5G;C9ORF150;KCTD12;PPP1R12B;HMGCLL1;F2RL2;CPEB4;SOX5
TBP (human)	29/2486	0.00253771	0.0256699	-1.28381	4.70189	DGKB;AMY2B;CAB39L;RGS13;NEDD9;MLLT3;CLGN;CTSO;SPTLC3;PLAGL1;DDX26B;ARHGDIB;NAALAD2;SLC17A8;KIFAP3;GPR155;DYNC1I1;ODAM;AKR1C1;RFTN1;TNFRSF19;MUM1L1;TANC1;INPP4B;BAMBI;LCP1;IL6ST;PPP1R12B;F2RL2
ARNT (human)	18/1303	0.00326881	0.0299009	-1.46399	5.13842	NTRK2;DOCK9;BNC1;DLX5;DENND5B;SLC6A16;FITM2;MLLT3;DLK1;INPP4B;KIF26B;PDCD4;PMP22;TCP11L2;KCNQ5;IL6ST;SOX5;CAP2
YY1 (human)	57/6042	0.00318879	0.0299009	-1.35325	4.74973	GUCY1B3;CLSTN2;DGKB;DPY19L2P2;TCF21;SNORD115-11;RERG;GLI3;LRRTM3;ARHGDIB;C9ORF150;KIFAP3;YAF2;ADAMTS6;SULT1C4;SOX5;MUM1L1;TNFRSF19;ARID5B;HCFC2;TANC2;PYGO1;CDC20B;INPP4B;FRMD6;ERP27;KCTD12;PPP1R12B;CAMK1G;FREM2;DLX5;SEMA3D;RGS13;PTN;LTBP1;C11ORF9;SPOCK3;SLITRK6;NAALAD2;SLC17A8;GPR155;DYNC1I1;GBP4;ODAM;SIAH3;CNTN6;AKR1C1;PLCL2;WDR52;SNORD115-44;SULF1;DLK1;ASXL3;SYT10;COL5A2;CYP1A1;RGL1
POU2F1 (mouse)	22/1735	0.00329706	0.0299009	-1.34054	4.70512	NIPSNAP3A;PRRX1;DGKB;SIAH3;LHFP;ADHFE1;PLCL2;MUM1L1;PLEKHA6;MLLT3;CXXC4;ZHX1;DLK1;RERG;CTSO;SESN3;COL5A2;ATG4A;CNTN4;ACPP;IL6ST;ADAMTS6
SMAD4 (human)	20/1542	0.00394914	0.0346208	-1.4078	4.73485	SVIL;NTRK2;FZD4;CNTN6;LYST;GLI3;GHR;INPP4B;ZADH2;NOSTRIN;PDCD4;GPR126;C9ORF150;FLNC;KIFAP3;DYNC1I1;CAMK1G;GBP4;PPIL6;SOX5
FOXL1 (human)	54/5755	0.0047906	0.0406428	-1.47269	4.71692	ROBO2;GUCY1B3;CLSTN2;CAB39L;GBE1;PROS1;SNORD115-12;GXYLT2;ARHGAP6;GHR;SESN3;LRRTM3;SPTLC3;BOC;TCP11L2;RNF150;KIFAP3;BBS5;SULT1C4;TAS2R10;TET2;EMP2;WDR78;PYGO1;FRMD6;DOK6;ATG4A;ACPP;PPP1R12B;CAMK1G;NXPH2;SEMA3D;TRANK1;C7ORF58;NEDD9;MLLT3;KIAA1370;PLD1;CXXC4;DDX26B;PLAGL1;KIAA1324;SPOCK3;NAALAD2;SLC17A8;NTRK2;ZNF781;WDR52;DPY19L2;ASXL3;MGP;PMP22;CNTN4;MAP3K13
POU3F1 (human)	5/162	0.0053181	0.0431046	-1.51038	4.74882	ZNF781;NETO1;BOC;SLC17A8;SULT1C4
GATA3 (human)	28/2505	0.00540856	0.0431046	-1.29533	4.07269	GUCY1B3;SEMA3D;NEDD9;ADAMTS12;RCSD1;LBH;LRRTM3;DDX26B;FLNC;KIFAP3;HMGCLL1;GBP4;SOX5;SVIL;NIPSNAP3A;TNFRSF19;HCFC2;DLK1;FRMD6;COL5A2;NOSTRIN;CYP1A1;ERP27;CCDC3;KCTD12;RGL1;IL6ST;CAMK1G
JUND (human)	18/1380	0.00584278	0.0439896	-1.34566	4.20358	SVIL;ODAM;SEMA3D;ADHFE1;AKR1C1;SULF1;C20ORF132;CDC20B;LRRTM3;MGP;SLITRK6;GPR126;PPP1R12B;BBS5;F2RL2;ADAMTS6;GBP4;SOX5
STAT3 (human)	30/2759	0.00585413	0.0439896	-1.16756	3.64721	CTTNBP2;RGS13;GBE1;CCDC146;AFF3;ARHGAP6;LTBP1;CTSO;LBH;DACH1;NAALAD2;RNF150;KIFAP3;EDN1;SIAH3;LHFP;TNFRSF19;WDR52;SMAD9;CDC20B;SH3RF2;TANC1;ASXL3;DOK6;ERP27;CNTN4;MAP3K13;RGL1;ACPP;YPEL2
IRF2 (human)	18/1412	0.0073157	0.0511344	-1.30689	3.88577	DENND5B;GBE1;PROS1;KCNJ13;CCDC146;LRP1B;C20ORF132;SH3RF2;CTSO;DPY19L2;NOSTRIN;SLITRK6;DNAJC5G;ACPP;KIFAP3;PPP1R12B;BBS5;SOX5
HMGA1 (mouse)	21/1748	0.00738824	0.0511344	-1.21124	3.60138	NXPH2;CTTNBP2;GBE1;PLCL2;TNFRSF19;WDR52;PLEKHA6;KCNA5;MLLT3;LTBP1;CXXC4;LRP1B;RERG;GHR;NETO1;LRRTM3;SLITRK6;HOXB3;PRKD1;PPP1R12B;MAPK4
MEF2A (human)	30/2800	0.00716661	0.0511344	-1.18783	3.53176	CAB39L;SEMA3D;RGS13;PROS1;AFF3;ARHGAP6;GLI3;CTSO;CSRP1;PLAGL1;SLITRK6;C9ORF150;GBP4;CAP2;SIAH3;ODAM;ADHFE1;RFTN1;WDR52;ARID5B;WDR78;SULF1;ZHX1;TANC2;LRP1B;TANC1;SYT10;HOXB3;CPE;IL6ST
NFATC2 (human)	4/117	0.00884992	0.0572517	-1.35877	3.8865	NEDD9;CNTN4;AFF3;GPR155
TEAD1 (human)	19/1547	0.00859741	0.0572517	-1.25835	3.59927	AMY2B;SIAH3;CTTNBP2;DGKB;MUM1L1;TRANK1;C7ORF58;ADAMTS12;AFF3;MLLT3;ZHX1;CDC20B;DOK6;NOSTRIN;CPE;CNTN4;RIN2;CAP2;SOX5
HNF4A (human)	24/2127	0.00892517	0.0572517	-1.18459	3.38829	ROBO2;ABCA1;IL1R1;LHFP;RGS13;GBE1;KCNJ13;TET2;PROX1;AFF3;C11ORF9;GHR;SH3RF2;DACH1;DDX26B;MGP;NOSTRIN;CCDC3;KCTD12;ST3GAL1;GPR155;RIN2;F2RL2;SOX5
TP53 (human)	30/2866	0.0097918	0.0613153	-1.0939	3.05387	RGS13;GBE1;PROS1;NEDD9;TCF21;FITM2;AFF3;CXXC4;LTBP1;CLGN;CTSO;DDX26B;KIAA1324;KIFAP3;HMGCLL1;GPR155;GBP4;SOX5;SLC30A3;LHFP;ODAM;CNTN6;SMAD9;ARID5B;CDC20B;FRMD6;DOK4;KCTD12;PPP1R12B;CAMK1G
En1 (mouse)	13/957	0.0134272	0.0821244	-1.31367	3.28356	NTRK2;DOCK9;SIAH3;NEDD9;RERG;DOK4;SPTLC3;CNTN4;HMGCLL1;F2RL2;ADAMTS6;MAPK4;CAP2
Pax2 (mouse)	18/1516	0.014298	0.085463	-1.33478	3.28312	SVIL;IL1R1;PLK2;PLCL2;TET2;SMAD9;ARHGAP6;ZHX1;INPP4B;DPY19L2;ASXL3;SLITRK6;DNAJC5G;RNF150;PRKD1;RGL1;ACPP;CAMK1G
SPI1 (human)	19/1638	0.0149444	0.087342	-1.25661	3.06352	NTRK2;SLC6A16;PROX1;SULF1;AFF3;LYST;CTSO;FRMD6;SESN3;PLAGL1;ACCN2;KIAA1324;MGP;SPOCK3;ST3GAL6;CNTN4;YAF2;DGKI;CPEB4
CBEPB (human)	27/2598	0.0154373	0.0882611	-1.06604	2.58778	DGKB;RGS13;PROS1;TCF21;ARHGAP6;LTBP1;CLGN;CSRP1;PLAGL1;SLITRK6;GBP4;SIAH3;ODAM;AKR1C1;HEG1;TET2;SULF1;LRP1B;FRMD6;DOK4;HOXB3;KCNQ5;KCTD12;PPP1R12B;MAP3K13;FREM2;FBN1
CRTC1 (human)	14/1086	0.0157938	0.0883782	-1.17084	2.84061	SVIL;CTTNBP2;ST8SIA1;CAB39L;AKR1C1;DDX26B;PMP22;HOXB3;TCP11L2;ERP27;ST3GAL6;C9ORF150;RIN2;CAMK1G
IRF8 (human)	18/1550	0.0174725	0.0957349	-1.136	2.66524	JAG1;PRRX1;AMY2B;KCNJ13;TET2;ADAMTS12;MLLT3;ARHGAP6;LTBP1;FRMD6;LBH;DACH1;NETO1;DOK4;DNAJC6;DOK6;ARHGDIB;FLNC
HIF1A (mouse)	14/1124	0.0205036	0.107296	-1.1761	2.62526	ROBO2;NXPH2;SEMA3D;TET2;EMP2;PLD1;LRP1B;LBH;CSRP1;SPOCK3;MGP;RNF150;KIFAP3;FREM2
MAX (human)	21/1934	0.0207583	0.107296	-1.12451	2.51009	ABCA1;SVIL;NTRK2;SLC30A3;SLC6A16;BNC1;GBE1;TNFRSF19;PLCL2;TET2;WDR52;TRANK1;CACNA1G;C20ORF132;ZADH2;PLAGL1;ACCN2;KIF26B;KIAA1324;ZNF503;DGKI
GATA2 (human)	81/9985	0.0208064	0.107296	-1.12216	2.50484	GUCY1B3;BNC1;CAB39L;SNORD115-12;SNORD115-11;RCSD1;AFF3;ARHGAP6;LYST;GHR;CTSO;LBH;SESN3;LRRTM3;CSRP1;ARHGDIB;TCP11L2;RNF150;KIFAP3;YAF2;BBS5;ADAMTS6;SULT1C4;CCBE1;PRKCH;TAS2R10;IL1R1;HEG1;MUM1L1;TNFRSF19;TET2;ZHX1;TANC2;PYGO1;CDC20B;TANC1;FRMD6;DOK6;MAP1A;ERP27;KCNQ5;KCTD12;LCP1;DGKI;GLT25D2;NXPH2;C7ORF58;FIGNL2;MLLT3;KIAA1370;ADAMTS12;LTBP1;PLAGL1;SLC17A8;FLNC;MAPK4;GBP4;CAP2;ABCA1;NTRK2;SVIL;ZNF…
NFYA (human)	26/2549	0.0214405	0.10844	-1.00917	2.24194	DLX5;DGKB;CCDC146;C7ORF58;LTBP1;CACNA1G;SESN3;LRRTM3;PLAGL1;SPOCK3;KIFAP3;CAP2;NTRK2;SIAH3;RFTN1;WDR52;CDC20B;DPY19L2;SYT10;ST7;MGP;NOSTRIN;HOXB3;MAP3K13;FREM2;DGKI
TEAD2 (mouse)	18/1591	0.0220037	0.109188	-1.07406	2.37871	ROBO2;GUCY1B3;MUM1L1;ARID5B;SMAD9;PROX1;MLLT3;RCSD1;WDR78;CACNA1G;GHR;NETO1;DNAJC6;ZADH2;ACCN2;PAPPA;CYP1A1;TCP11L2
EGR1 (mouse)	18/1617	0.025314	0.123288	-1.02479	2.14511	NTRK2;SLC30A3;HEG1;PLCL2;TET2;SMAD9;RCSD1;PYGO1;FRMD6;LBH;MMP15;BAMBI;ZADH2;ASXL3;CYP1A1;KCTD12;YPEL2;SOX5
ATF1 (human)	5/264	0.0345482	0.165203	-1.20922	2.17729	ABCA1;SIAH3;SLC6A16;COL5A2;F2RL2
GATA1 (human)	26/2679	0.0364746	0.1713	-0.944993	1.66728	GLT25D2;DLX5;RGS13;PROS1;RCSD1;DACH1;NETO1;C9ORF150;KIFAP3;GPR155;BBS5;SVIL;NTRK2;SIAH3;CNTN6;MUM1L1;WDR52;ARID5B;PROX1;BAMBI;PAPPA;ASXL3;PMP22;F2RL2;CAMK1G;FREM2
CBFB (human)	10/774	0.0378394	0.174592	-1.14121	1.99176	NTRK2;BNC1;AMY2B;CYP1A1;TRANK1;FIGNL2;CXXC4;ST3GAL1;ARHGAP6;MAPK4
NME2 (human)	1945-02-01	0.0392311	0.177893	-0.373784	0.645367	KIF26B;RCSD1
TEAD4 (human)	15/1354	0.0407899	0.181826	-0.981586	1.67331	FZD4;CACNA1G;LBH;NETO1;FRZB;ZADH2;KIF26B;CYP1A1;TCP11L2;FLNC;CNTN4;IL6ST;GPR155;YPEL2;SOX5
Pdx1 (mouse)	11/907	0.0441609	0.184354	-1.12886	1.90879	GHR;ROBO2;FRMD6;ODAM;FRZB;ZADH2;DOCK9;PAPPA;KCNQ5;RNF150;YPEL2
NR5A1 (mouse)	12/1020	0.0441263	0.184354	-0.996046	1.68421	GLT25D2;LBH;DOK4;PLAGL1;TRANK1;PDCD4;CPE;DNAJC5G;ACPP;YAF2;ADAMTS6;FREM2
CBEPA (human)	15/1366	0.0434458	0.184354	-0.97903	1.65544	CCBE1;SLC30A3;FZD4;ODAM;GBE1;FIGNL2;NEDD9;PTN;PROX1;C11ORF9;ACCN2;BOC;BBS5;SOX5;SULT1C4
NFKB1 (human)	32/3497	0.0427553	0.184354	-0.827656	1.39948	DOCK9;DLX5;CCDC146;TRANK1;LTBP1;CACNA1G;NETO1;CSRP1;FRZB;PLAGL1;KIAA1984;NAALAD2;ST3GAL1;GBP4;SOX5;SULT1C4;SVIL;NIPSNAP3A;SLC30A3;FZD4;LHFP;DLK1;ST7;PMP22;ATG4A;KCNQ5;LCP1;RGL1;PPP1R12B;RIN2;CPEB4;FBN1
NFATC3 (human)	3/116	0.0454454	0.186752	-0.886497	1.48752	PRRX1;KCNA5;RCSD1
USF2 (human)	34/3792	0.0473309	0.191508	-0.737751	1.21937	GUCY1B3;BNC1;DOCK9;AMY2B;GBE1;TRANK1;PLD1;KIAA1370;AFF3;C11ORF9;CACNA1G;SPTLC3;SPOCK3;KIAA1324;KIAA1984;HMGCLL1;ST3GAL1;GPR155;ABCA1;CNTN6;TNFRSF19;RFTN1;TET2;DLK1;C20ORF132;FRMD6;DOK4;ACCN2;KIF26B;CYP1A1;PDCD4;CNTN4;PPP1R12B;DGKI
POU2F2 (mouse)	18/1754	0.0493219	0.193607	-0.848235	1.39274	ABCA1;NIPSNAP3A;PRRX1;SIAH3;LHFP;MUM1L1;PLEKHA6;MLLT3;ARHGAP6;CXXC4;ZHX1;CACNA1G;SESN3;DOK6;KCTD12;ACPP;IL6ST;ADAMTS6
TBX5 (human)	1951-02-01	0.0487385	0.193607	-0.231376	0.379902	TNFRSF19;PLCL2
FOXA3 (human)	4/207	0.0530736	0.202295	-1.02244	1.63389	DACH1;ASXL3;C7ORF58;KIFAP3
IRF8 (mouse)	18/1770	0.0529315	0.202295	-0.815807	1.30368	ROBO2;CTTNBP2;DLX5;HEG1;CCDC146;NEDD9;PLD1;LTBP1;DLK1;INPP4B;ZADH2;PDCD4;NAALAD2;KCNQ5;RNF150;BBS5;CAMK1G;GBP4
HOXD9 (human)	16/1543	0.057395	0.214129	-0.850558	1.31086	ROBO2;ODAM;CAB39L;RGS13;HEG1;KCNJ13;NEDD9;EMP2;HCFC2;TANC1;DOK4;ST7;PMP22;HOXB3;F2RL2;GBP4
STAT1 (human)	17/1667	0.0578068	0.214129	-0.81584	1.25735	ODAM;AMY2B;AKR1C1;WDR52;CDC20B;CTSO;CSRP1;SPTLC3;FRZB;NOSTRIN;PMP22;KCTD12;IL6ST;MAP3K13;RIN2;ADAMTS6;SOX5
Sox5 (mouse)	9/728	0.0591951	0.216226	-0.994377	1.52282	PRKCH;NETO1;SLC30A3;SPOCK3;CYP1A1;WDR52;TCF21;ST3GAL6;ARHGAP6
ELK4 (human)	15/1453	0.0664683	0.239468	-0.851286	1.21677	NTRK2;EDN1;ODAM;GBE1;NEDD9;ARID5B;PTN;CTSO;DPY19L2;KIF26B;PDCD4;ZNF503;GPR155;CPEB4;SOX5
REPIN1 (human)	15/1466	0.0705048	0.250578	-0.829194	1.14759	SVIL;NTRK2;JAG1;LHFP;HEG1;SMAD9;ARID5B;ARHGAP6;CACNA1G;C11ORF9;CDC20B;LBH;BAMBI;MMP15;RGL1
SPIB (human)	9/760	0.0729395	0.253381	-1.03029	1.41444	ROBO2;NIPSNAP3A;FRZB;ZADH2;DLX5;ACCN2;PLCL2;PMP22;RCSD1
FOXF1 (human)	14/1352	0.0732205	0.253381	-0.806116	1.10668	SVIL;NIPSNAP3A;CTTNBP2;SEMA3D;PROS1;WDR52;ARID5B;TANC2;DDX26B;SYT10;KCTD12;PRKD1;C9ORF150;PPP1R12B
MIR133B (human)	15/1500	0.0818268	0.279486	-0.778658	0.992635	SVIL;PRKCH;PLCL2;TRANK1;FITM2;WDR78;C11ORF9;C20ORF132;NOSTRIN;NAALAD2;ST3GAL6;SLC17A8;KCTD12;RGL1;GBP4
ARID3A (mouse)	18/1893	0.0870577	0.283652	-0.816187	1.0284	NTRK2;ODAM;PROS1;TNFRSF19;SULF1;PLD1;LTBP1;DACH1;CSRP1;LRRTM3;ZADH2;FRZB;MGP;CYP1A1;NAALAD2;SLC17A8;KIFAP3;F2RL2
ELK1 (human)	15/1511	0.0857297	0.283652	-0.756326	0.952977	ROBO2;ZNF781;EDN1;NIPSNAP3A;SMAD9;PROX1;ADAMTS12;MLLT3;CLGN;CSRP1;FRZB;HOXB3;RIN2;FREM2;SOX5
NFIC (human)	37/4403	0.0847736	0.283652	-0.73828	0.930238	DLX5;DGKB;CCDC146;C7ORF58;TCF21;KIAA1370;ARHGAP6;LTBP1;RERG;CACNA1G;SESN3;CSRP1;ZNF503;C9ORF150;CAP2;SVIL;EDN1;SIAH3;PLK2;RFTN1;WDR52;PLEKHA6;PROX1;SNORD115-44;DLK1;C20ORF132;CDC20B;FRMD6;SYT10;ST7;NOSTRIN;IL6ST;RGL1;MAP3K13;FREM2;DGKI;FSIP2
SMAD3 (mouse)	1972-02-01	0.0873604	0.283652	-0.288474	0.36348	HOXB3;CACNA1G
HNF4A (mouse)	6/461	0.0931164	0.295056	-0.826382	1.00867	CLSTN2;FZD4;HOXB3;AFF3;ADAMTS12;LRP1B
RELA (mouse)	16/1656	0.0928103	0.295056	-0.639438	0.780492	PRRX1;SLC30A3;DOCK9;PLK2;CCDC146;RFTN1;KCNA5;LTBP1;ARHGAP6;CACNA1G;ASXL3;CPE;ST3GAL6;FLNC;YAF2;YPEL2
SMARCA2 (human)	15/1536	0.0950408	0.297568	-0.729188	0.883857	SVIL;DLX5;WDR52;SMAD9;TCF21;ARHGAP6;CACNA1G;C20ORF132;SESN3;ST7;NOSTRIN;GPR126;IL6ST;MAP3K13;FREM2
Prrx2 (mouse)	20/2205	0.105194	0.325483	-0.736113	0.826246	ROBO2;NXPH2;PLK2;TNFRSF19;ARID5B;DLK1;GHR;DACH1;FRMD6;SPTLC3;FRZB;DOK6;PAPPA;NAALAD2;KCNQ5;RNF150;PRKD1;PPP1R12B;RIN2;DYNC1I1
IRF2 (mouse)	16/1706	0.112167	0.341368	-0.608724	0.654254	NXPH2;ODAM;CAB39L;TRANK1;MLLT3;LTBP1;DLK1;CLGN;GHR;LRRTM3;MMP15;SPTLC3;DNAJC6;HOXB3;ADAMTS6;SOX5
SMAD4 (mouse)	15/1580	0.112924	0.341368	-0.591989	0.636267	NTRK2;JAG1;PLK2;MUM1L1;EMP2;WDR78;GLI3;DLK1;TANC2;CLGN;FRMD6;BAMBI;ZADH2;ASXL3;PDCD4
XBP1 (human)	7/605	0.115842	0.34621	-0.801671	0.850341	SH3RF2;LBH;NIPSNAP3A;ZADH2;DNAJC5G;ST3GAL6;GLI3
NR3C1 (human)	15/1590	0.117254	0.346493	-0.574729	0.609152	SVIL;SIAH3;RGS13;SMAD9;NEDD9;LTBP1;C20ORF132;INPP4B;CSRP1;KIAA1984;PMP22;SLC17A8;RGL1;PPP1R12B;ADAMTS6
RUNX1 (human)	32/3857	0.119117	0.348087	-0.429346	0.453089	GUCY1B3;DGKB;DOCK9;AMY2B;C7ORF58;TCF21;RCSD1;ARHGAP6;LTBP1;CACNA1G;C11ORF9;SESN3;LRRTM3;ARHGDIB;TCP11L2;DYNC1I1;CAP2;SVIL;SIAH3;GTF2IRD2;RFTN1;WDR52;DLK1;CDC20B;DPY19L2;DOK4;SYT10;ST7;NOSTRIN;MAP3K13;PPP1R12B;FREM2
Gata1 (mouse)	17/1863	0.123745	0.357638	-0.516594	0.53118	GUCY1B3;TRANK1;MLLT3;SULF1;RCSD1;DACH1;ZADH2;SYT10;PAPPA;SPOCK3;CYP1A1;PDCD4;NAALAD2;IL6ST;HMGCLL1;ADAMTS6;DYNC1I1
NR5A2 (mouse)	16/1748	0.130197	0.372194	-0.541417	0.535104	GUCY1B3;NTRK2;JAG1;SLC30A3;CAB39L;NEDD9;ARHGAP6;LYST;GHR;ASXL3;BOC;CPE;ERP27;CCDC3;ACPP;FBN1
CRTC3 (human)	10/1008	0.143436	0.397614	-0.640559	0.590771	AKR1C1;COL5A2;ZNF503;TCP11L2;ST3GAL6;PLD1;PPP1R12B;LRP1B;DGKI;CAP2
ATF2 (human)	14/1517	0.143625	0.397614	-0.5305	0.489266	PRRX1;GBE1;KCNJ13;MUM1L1;TET2;SMAD9;TCF21;AFF3;C20ORF132;DACH1;ASXL3;NAALAD2;DNAJC5G;RIN2
JUN (human)	25/2976	0.142787	0.397614	-0.437325	0.403334	LTBP1;GLI3;CTSO;PLAGL1;SLITRK6;TCP11L2;C9ORF150;FLNC;SVIL;NTRK2;ODAM;CNTN6;HEG1;TET2;C20ORF132;SH3RF2;DPY19L2;DNAJC6;PAPPA;MAP1A;MGP;PMP22;GPR126;PPP1R12B;F2RL2
IRF7 (human)	1999-02-01	0.145832	0.399519	-0.236337	0.216838	PRKCH;FLNC
MYOG (human)	13/1404	0.152224	0.412732	-0.515119	0.455858	PRRX1;GBE1;PLCL2;AFF3;HCFC2;LYST;CTSO;MMP15;COL5A2;GPR126;TCP11L2;CCDC3;CAMK1G
Nobox (mouse)	3/201	0.155606	0.413377	-0.594498	0.525177	GHR;FRMD6;RNF150
NFATC3 (mouse)	16/1801	0.15522	0.413377	-0.433681	0.383112	AMY2B;ODAM;DENND5B;CTTNBP2;RGS13;MUM1L1;AFF3;DLK1;TANC1;PDCD4;CPE;HOXB3;ST3GAL6;RNF150;YAF2;FREM2
FOXF1 (mouse)	3/206	0.163595	0.430255	-0.499192	0.421007	PRRX1;HOXB3;CXXC4
MYC (human)	12/1302	0.168065	0.431853	-0.479768	0.402847	ABCA1;BNC1;KIF26B;PLAGL1;ACCN2;KIAA1984;KIAA1324;TET2;TRANK1;PLEKHA6;AFF3;DGKI
SP1 (mouse)	20/2360	0.167391	0.431853	-0.36136	0.303423	SLC30A3;DOCK9;FZD4;BNC1;HEG1;PLCL2;TNFRSF19;MLLT3;GLI3;TANC2;PYGO1;FRMD6;ZADH2;KIF26B;ASXL3;PDCD4;RNF150;YAF2;GPR155;MAPK4
MYOD1 (human)	2/109	0.169129	0.431853	-0.176576	0.148266	NOSTRIN;DNAJC5G
MTF1 (human)	13/1440	0.172858	0.43713	-0.457037	0.378209	SVIL;NTRK2;SIAH3;DOCK9;TET2;ARID5B;PROX1;C20ORF132;KIF26B;ASXL3;BOC;ZNF503;RGL1
HIVEP1 (human)	3/218	0.183246	0.458989	-0.524903	0.408758	NAALAD2;RIN2;DGKI
SND1 (human)	13/1473	0.192941	0.474239	-0.360478	0.268932	NIPSNAP3A;LHFP;TNFRSF19;CSRP1;KIF26B;MGP;NAALAD2;PPP1R12B;RIN2;FREM2;CPEB4;SOX5;SULT1C4
ETS2 (human)	12/1341	0.192775	0.474239	-0.356513	0.265974	GHR;ROBO2;EDN1;DLX5;BNC1;FRZB;PLCL2;TNFRSF19;KCNQ5;PTN;RGL1;MLLT3
MZF1_1-4 (human)	22/2705	0.201313	0.483971	-0.522759	0.379382	CCBE1;EDN1;CLSTN2;SLC30A3;TNFRSF19;PLEKHA6;AFF3;MLLT3;CSRP1;ZADH2;MMP15;PLAGL1;PAPPA;NOSTRIN;ZNF503;DNAJC5G;FLNC;ACPP;F2RL2;CPEB4;FSIP2;YPEL2
FOXJ1 (human)	13/1484	0.199873	0.483971	-0.376545	0.27327	SVIL;EDN1;RFTN1;SULF1;NOSTRIN;NAALAD2;ST3GAL6;C9ORF150;ACPP;KIFAP3;MAPK4;DYNC1I1;GBP4
JDP2 (human)	13/1488	0.202422	0.483971	-0.359944	0.261222	EDN1;CLSTN2;LHFP;PLD1;GLI3;C11ORF9;TANC1;CTSO;DPY19L2;SPTLC3;CNTN4;KIFAP3;CAP2
Stat3 (mouse)	15/1762	0.206514	0.489309	-0.277077	0.198044	ROBO2;NIPSNAP3A;PRKCH;CAB39L;ST8SIA1;CCDC146;TNFRSF19;PTN;WDR78;LRP1B;DACH1;DDX26B;PDCD4;PPP1R12B;F2RL2
CBEPB (mouse)	26/3275	0.208931	0.490616	-0.182743	0.13013	GLT25D2;AMY2B;DLX5;CAB39L;DOCK9;GBE1;TRANK1;RCSD1;LTBP1;GHR;GPR155;GBP4;NIPSNAP3A;FER1L4;GTF2IRD2;MUM1L1;TNFRSF19;PROX1;SULF1;TANC2;MMP15;ASXL3;HOXB3;ATG4A;CNTN4;FREM2
CREB1 (human)	22/2749	0.222871	0.518719	-0.190042	0.124743	NTRK2;EDN1;CLSTN2;IL1R1;ADHFE1;PROS1;KCNJ13;TET2;AFF3;PLD1;ARHGAP6;LTBP1;LYST;C11ORF9;CTSO;LRRTM3;PLAGL1;ASXL3;KIAA1984;SLITRK6;RIN2;ADAMTS6
NR5A1 (human)	12/1389	0.225343	0.51987	-0.294247	0.19249	FRMD6;LRRTM3;FZD4;ODAM;PDCD4;WDR78;ACPP;KIFAP3;GPR155;F2RL2;C11ORF9;PPIL6
LOC135440 (human)	3/247	0.232978	0.528218	-0.338794	0.216234	CPE;NEDD9;LTBP1
ATF4 (human)	12/1398	0.231692	0.528218	-0.280635	0.179114	JAG1;CLSTN2;DOCK9;PLAGL1;ADHFE1;ASXL3;KIFAP3;LTBP1;ADAMTS6;GLI3;C11ORF9;SULT1C4
PURA (human)	5/492	0.23782	0.534586	-0.40474	0.253473	AMY2B;IL1R1;ADHFE1;PLCL2;ADAMTS6
Nr2e3 (mouse)	2/139	0.241784	0.538892	-0.140619	0.0869365	GBE1;PPIL6
SAMD9L (human)	12/1415	0.24388	0.538995	-0.259904	0.160634	SVIL;LBH;FRZB;PROS1;PMP22;CPE;DNAJC5G;SLC17A8;ARHGAP6;GPR155;DGKI;SULT1C4
NKX2-8 (human)	3/256	0.248895	0.545496	-0.294355	0.178397	CNTN6;ST8SIA1;ARHGDIB
JUN (mouse)	14/1699	0.252544	0.548918	-0.144449	0.0866416	CLSTN2;TNFRSF19;NEDD9;KCNA5;AFF3;RCSD1;HCFC2;LTBP1;DPY19L2;DNAJC6;ASXL3;ST7;CPE;RNF150
ZBTB16 (human)	13/1572	0.259149	0.558657	-0.202104	0.117669	CAB39L;AKR1C1;MUM1L1;AFF3;RERG;C20ORF132;FRMD6;NOSTRIN;IL6ST;HMGCLL1;F2RL2;ADAMTS6;SOX5
WT1 (human)	21/2689	0.26479	0.56161	-0.0277818	0.0160287	GLT25D2;GTF2IRD2;DOCK9;TET2;CXXC4;GLI3;CACNA1G;GHR;NETO1;PLAGL1;ASXL3;DOK6;BOC;TCP11L2;ZNF503;CNTN4;FLNC;F2RL2;MAPK4;PPIL6;SOX5
NR5A2 (human)	29/3815	0.263357	0.56161	0.0210257	-0.0121307	GBE1;NEDD9;CLGN;C11ORF9;CTSO;SESN3;SPTLC3;DNAJC5G;GPR155;SOX5;NTRK2;PRKCH;NIPSNAP3A;SLC30A3;ST8SIA1;AKR1C1;PLCL2;SMAD9;FRMD6;MMP15;MGP;ERP27;PRKD1;CCDC3;LCP1;IL6ST;PPP1R12B;RIN2;CAMK1G
MXI1 (human)	1946-01-01	0.269777	0.56761	1.81835	-1.02977	CSRP1
ZNF148 (human)	13/1591	0.272737	0.569284	-0.129437	0.0729215	SVIL;PLCL2;CXXC4;ARHGAP6;DLK1;GLI3;CACNA1G;INPP4B;NETO1;KIAA1984;HOXB3;ZNF503;KCNQ5
RUNX2 (human)	12/1458	0.275744	0.571028	-0.153141	0.0858075	SVIL;GLT25D2;ZNF781;KCNJ13;MUM1L1;NOSTRIN;FIGNL2;FITM2;WDR78;ACPP;LTBP1;DYNC1I1
HOXA5 (human)	23/3000	0.280996	0.577358	-0.24399	0.134022	SVIL;PRKCH;CLSTN2;ST8SIA1;CNTN6;SEMA3D;FITM2;TANC2;LRP1B;DACH1;FRZB;PAPPA;SYT10;CYP1A1;DNAJC5G;C9ORF150;IL6ST;PPP1R12B;YAF2;BBS5;FREM2;GBP4;FBN1
RELB (human)	12/1469	0.28411	0.579232	-0.107168	0.0585195	CDC20B;GBE1;ASXL3;ST7;KIAA1324;PMP22;PDCD4;RIN2;DLK1;GBP4;CLGN;PPIL6
TEAD2 (human)	12/1486	0.297194	0.587699	-0.0690309	0.0366927	DPY19L2;CSRP1;SLC30A3;FRZB;PLAGL1;PLCL2;GPR126;MLLT3;GLI3;C11ORF9;CACNA1G;SOX5
UBTF (human)	12/1493	0.302632	0.587699	-0.0630958	0.0335379	INPP4B;NETO1;SIAH3;GTF2IRD2;PLAGL1;MUM1L1;SMAD9;ARID5B;PROX1;CCDC3;IL6ST;AFF3
THRB (human)	16/2034	0.29162	0.587699	-0.056254	0.0299013	PRKCH;GTF2IRD2;HEG1;TNFRSF19;SMAD9;CXXC4;C11ORF9;GHR;FRMD6;SESN3;CYP1A1;PDCD4;CCDC3;RGL1;GTF2IRD2B;DGKI
Myb (mouse)	15/1902	0.29674	0.587699	-0.0462581	0.024588	GUCY1B3;SLC30A3;RCSD1;ZHX1;GLI3;CACNA1G;LBH;DPY19L2;SESN3;SYT10;DOK6;ACCN2;PLAGL1;PDCD4;ERP27
PLAU (human)	11/1362	0.30851	0.587699	-0.02328	0.0123743	CLSTN2;DOCK9;ADHFE1;ASXL3;ARHGDIB;TET2;PROX1;LTBP1;LYST;ADAMTS6;C11ORF9
TFAP2A (human)	27/3613	0.304417	0.587699	-0.0172668	0.00917801	ROBO2;DOCK9;NEDD9;SNORD115-12;SNORD115-11;LTBP1;GLI3;CACNA1G;C11ORF9;NETO1;TCP11L2;MAPK4;SOX5;SVIL;PRKCH;IL1R1;ODAM;RFTN1;SNORD115-44;HCFC2;TBX18;FRMD6;ACCN2;KIF26B;PMP22;RGL1;CPEB4
SREBF2 (human)	11/1361	0.30769	0.587699	-0.0150325	0.0079904	CSRP1;KCNJ13;MAP1A;RFTN1;CYP1A1;PMP22;HCFC2;CAMK1G;FBN1;C11ORF9;SULT1C4
E2F6 (human)	11/1358	0.305231	0.587699	-0.00221678	0.00117831	ROBO2;TANC1;SVIL;ZADH2;BOC;GPR126;KCNA5;YAF2;LYST;CACNA1G;C20ORF132
SRF (mouse)	14/1782	0.310609	0.587699	0.0611341	-0.0324952	MUM1L1;ARID5B;RERG;INPP4B;SPTLC3;DOK6;PAPPA;KIF26B;SPOCK3;COL5A2;CNTN4;HMGCLL1;DYNC1I1;CPEB4
TBP (mouse)	24/3182	0.30285	0.587699	0.119944	-0.0637552	AMY2B;ODAM;LHFP;PLK2;GBE1;MUM1L1;TRANK1;ARID5B;PTN;SULF1;PLD1;LTBP1;ARHGAP6;LRP1B;GHR;SH3RF2;TANC1;SPTLC3;PAPPA;COL5A2;BBS5;HMGCLL1;F2RL2;CPEB4
BRCA1 (human)	14/1809	0.33028	0.604301	-0.0899385	0.0453005	SVIL;EDN1;SLC6A16;AMY2B;DPY19L2P2;NEDD9;SNORD115-11;ARHGAP6;CACNA1G;SPTLC3;DDX26B;CYP1A1;F2RL2;SOX5
KLF11 (human)	11/1388	0.330037	0.604301	0.0610621	-0.030756	SVIL;INPP4B;NETO1;PLCL2;KIAA1984;PMP22;HOXB3;ZNF503;KCNQ5;DLK1;GLI3
MZF1 (human)	11/1389	0.330872	0.604301	0.0867648	-0.043702	PRKCH;SLC30A3;TNFRSF19;TRANK1;PDCD4;GPR126;ZNF503;FLNC;KCTD12;F2RL2;PPIL6
Myf (human)	1958-01-01	0.326161	0.604301	1.3558	-0.682896	CSRP1
FOXM1 (human)	1958-01-01	0.326161	0.604301	1.70148	-0.857008	PPIL6
ZNF281 (human)	8/986	0.343877	0.623722	0.0129582	-0.00611691	ROBO2;NETO1;BNC1;DENND5B;PLEKHA6;FLNC;CCDC3;ARHGAP6
SOX10 (mouse)	4/451	0.35979	0.628504	0.0229955	-0.0106794	JAG1;CNTN6;CYP1A1;SOX5
CEBPB (human)	11/1420	0.356952	0.628504	0.123823	-0.057505	DNAJC6;CNTN6;NOSTRIN;PMP22;GPR126;TCP11L2;ARID5B;FLNC;KIFAP3;GLI3;C20ORF132
AP1 (mouse)	2/183	0.349601	0.628504	0.153047	-0.0710771	CCBE1;ST8SIA1
MYC (mouse)	13/1699	0.353868	0.628504	0.171236	-0.0795239	NTRK2;DOCK9;GTF2IRD2;TNFRSF19;GXYLT2;HCFC2;RERG;TANC2;CLGN;ACCN2;KIF26B;ASXL3;PPIL6
FOS (mouse)	13/1708	0.360852	0.628504	0.234499	-0.108904	CCBE1;SVIL;DOCK9;SEMA3D;GLI3;LRP1B;CLGN;DNAJC6;FLNC;MAP3K13;BBS5;HMGCLL1;F2RL2
NFE2L1 (human)	1965-01-01	0.357029	0.628504	1.62043	-0.75255	FRZB
FOXD1 (human)	2/192	0.371168	0.638022	0.190849	-0.0857646	TET2;CAMK1G
STAT1 (mouse)	1968-01-01	0.369823	0.638022	1.59679	-0.717573	DYNC1I1
USF1 (human)	11/1441	0.374805	0.639216	0.187873	-0.0840755	ABCA1;BNC1;GBE1;ACCN2;KIF26B;KIAA1324;TET2;TRANK1;DGKI;CACNA1G;C20ORF132
RORB (mouse)	8/1020	0.378142	0.639216	0.192861	-0.0863077	NETO1;NXPH2;MMP15;RGS13;CTTNBP2;ASXL3;PLD1;IL6ST
NR2F1 (mouse)	8/1021	0.379155	0.639216	0.194172	-0.0868947	NETO1;NXPH2;MMP15;RGS13;CTTNBP2;ASXL3;PLD1;IL6ST
SRY (human)	4/469	0.386934	0.646645	0.00478274	-0.00208507	FRMD6;SIAH3;MGP;WDR78
FOXA1 (human)	11/1457	0.388479	0.646645	0.255366	-0.111329	TANC1;CTTNBP2;PROS1;DDX26B;PLCL2;ATG4A;PRKD1;KCTD12;PPP1R12B;HCFC2;GBP4
E2F1 (mouse)	22/3056	0.396609	0.656026	0.43845	-0.18483	ABCA1;SVIL;GUCY1B3;CLSTN2;SLC30A3;AMY2B;DOCK9;PROS1;PLK2;TET2;NEDD9;EMP2;PTN;WDR78;GLI3;CACNA1G;CSRP1;PLAGL1;FLNC;PRKD1;CNTN4;DGKI
JUND (mouse)	13/1764	0.404745	0.661167	0.328243	-0.13581	ODAM;HEG1;TNFRSF19;FITM2;PLD1;WDR78;ARHGAP6;CSRP1;SPTLC3;PDCD4;HOXB3;ST3GAL6;F2RL2
RELA (human)	20/2775	0.402656	0.661167	0.41878	-0.173269	NIPSNAP3A;IL1R1;GTF2IRD2;DOCK9;DLX5;RGS13;FITM2;AFF3;KIAA1370;CACNA1G;CDC20B;PLAGL1;DDX26B;KIAA1324;KIAA1984;ZNF503;GTF2IRD2B;RIN2;MAPK4;SOX5
REL (human)	3/353	0.423781	0.662525	0.228491	-0.0940691	FRMD6;ZNF503;ST3GAL1
Sox17 (mouse)	4/500	0.433287	0.662525	0.259335	-0.106767	NTRK2;SIAH3;DDX26B;ADAMTS6
NR3C1 (mouse)	13/1775	0.413424	0.662525	0.350667	-0.144368	GLT25D2;NIPSNAP3A;ODAM;NEDD9;GXYLT2;GHR;INPP4B;HOXB3;CNTN4;MAP3K13;ACPP;HMGCLL1;PPIL6
FOXI1 (human)	2/217	0.429451	0.662525	0.356341	-0.146704	ZNF781;ARHGAP6
KLF4 (human)	11/1485	0.412503	0.662525	0.360058	-0.148235	SVIL;INPP4B;NETO1;PLCL2;KIAA1984;PMP22;HOXB3;ZNF503;KCNQ5;DLK1;GLI3
TFAP2C (human)	11/1485	0.412503	0.662525	0.365816	-0.150605	JAG1;KCNJ13;CCDC146;PMP22;KCNQ5;FLNC;WDR78;CXXC4;GPR155;LTBP1;RERG
ZFHX3 (human)	11/1504	0.428834	0.662525	0.369366	-0.152067	GTF2IRD2;RGS13;GBE1;ASXL3;KCNJ13;FITM2;PROX1;PPP1R12B;BBS5;RERG;LRP1B
PCBP1 (human)	10/1360	0.429683	0.662525	0.374197	-0.154056	FRMD6;DOCK9;FZD4;KIF26B;FLNC;IL6ST;GPR155;ZHX1;GLI3;CACNA1G
EIF4EBP1 (human)	2/212	0.418011	0.662525	0.395804	-0.162951	MMP15;GPR126
LTF (human)	10/1363	0.43239	0.662525	0.430341	-0.17717	CTSO;DOK4;MGP;ZNF503;FIGNL2;PROX1;SULF1;PLD1;AFF3;C20ORF132
FOXA2 (human)	1983-01-01	0.430096	0.662525	1.50735	-0.620571	MLLT3
VDR (human)	1988-01-01	0.448884	0.682408	1.45653	-0.556582	FLNC
HNF1B (human)	1990-01-01	0.456226	0.689583	1.43307	-0.532628	TANC2
FOXO3A (human)	6/813	0.464917	0.698704	0.370509	-0.132837	CTTNBP2;PROS1;DDX26B;PRKD1;RGL1;YAF2
SP1 (human)	10/1406	0.471064	0.70392	0.470079	-0.16504	FRMD6;NETO1;FZD4;DOCK9;KIF26B;FLNC;ZHX1;GPR155;GLI3;CACNA1G
GTF2I (human)	2/237	0.473982	0.704278	0.47167	-0.165359	GUCY1B3;TANC1
FOXA2 (mouse)	10/1441	0.50221	0.742029	0.5231	-0.156076	INPP4B;SESN3;AMY2B;KCNJ13;ARHGDIB;RNF150;PRKD1;ACPP;IL6ST;YPEL2
RUNX2 (mouse)	12/1750	0.511186	0.751072	0.589339	-0.1687	ROBO2;SH3RF2;SPTLC3;RGS13;DOCK9;CYP1A1;WDR52;ADAMTS12;ACPP;LTBP1;BBS5;CAP2
GABPA (human)	1/108	0.518073	0.756962	1.27485	-0.354972	FRZB
NKX3-1 (human)	2/264	0.530661	0.771071	0.467907	-0.121644	KIAA1324;CAP2
E2F4 (human)	2/270	0.542685	0.774731	0.49588	-0.126568	DNAJC5G;CNTN4
PPARA (human)	2/271	0.544668	0.774731	0.523736	-0.133678	SPTLC3;PAPPA
SP3 (human)	9/1332	0.538972	0.774731	0.54906	-0.140142	FRMD6;NETO1;DOCK9;FZD4;FLNC;GPR155;ZHX1;GLI3;CACNA1G
MIB2 (human)	10/1490	0.544963	0.774731	0.662854	-0.169186	CLSTN2;NETO1;GBE1;PLCL2;PMP22;SLC17A8;RGL1;RCSD1;SULF1;LTBP1
TCFAP2A (human)	9/1367	0.570366	0.806485	0.60577	-0.130283	FRMD6;NETO1;DOCK9;ASXL3;CXXC4;GLI3;C11ORF9;CACNA1G;SOX5
ETS1 (mouse)	11/1681	0.577201	0.807467	0.696148	-0.148873	SVIL;PRKCH;BAMBI;SPTLC3;DLX5;ST7;NEDD9;EMP2;MAP3K13;WDR78;HCFC2
CEBPE (human)	1/127	0.575777	0.807467	1.12846	-0.241324	CLGN
AHR (mouse)	3/454	0.589338	0.810046	0.498065	-0.104925	GTF2IRD2;CYP1A1;CAP2
AHR (human)	9/1391	0.591364	0.810046	0.650487	-0.137035	DPY19L2;GTF2IRD2;DENND5B;NOSTRIN;CYP1A1;ZNF503;C7ORF58;ZHX1;LTBP1
RBPJ (human)	10/1535	0.583029	0.810046	0.666232	-0.140352	LHFP;KCNJ13;AKR1C1;PMP22;SLITRK6;ZNF503;TCF21;SULF1;RCSD1;CXXC4
FOXO3 (human)	1/132	0.589784	0.810046	1.11433	-0.23475	CAMK1G
ETV4 (human)	9/1403	0.601686	0.819914	0.720294	-0.143019	ROBO2;INPP4B;NIPSNAP3A;PRRX1;NETO1;ZADH2;PDCD4;AFF3;ST3GAL1
SOX10 (human)	1/139	0.608624	0.825094	1.13933	-0.219046	ATG4A
Nkx3-2 (mouse)	7/1122	0.629664	0.835389	0.66277	-0.119205	DGKB;DNAJC6;MUM1L1;SMAD9;CNTN4;ARHGAP6;LTBP1
HIF1A (human)	10/1586	0.624429	0.835389	0.71145	-0.12796	SH3RF2;NTRK2;EDN1;SLC6A16;GTF2IRD2;BAMBI;YAF2;GTF2IRD2B;DYNC1I1;C11ORF9
CPEB1 (mouse)	11/1748	0.629269	0.835389	0.754964	-0.135787	GHR;SESN3;DGKB;SPTLC3;ADHFE1;PMP22;PLEKHA6;GXYLT2;SULF1;IL6ST;CACNA1G
NFYB (mouse)	11/1748	0.629269	0.835389	0.766233	-0.137813	GHR;SESN3;DGKB;SPTLC3;ADHFE1;PMP22;PLEKHA6;GXYLT2;SULF1;IL6ST;CACNA1G
NFE2 (human)	17/2681	0.6321	0.835389	0.9236	-0.166117	PRKCH;DGKB;BNC1;PLK2;CCDC146;PLCL2;PLEKHA6;C11ORF9;SH3RF2;INPP4B;CTSO;CSRP1;DOK4;BAMBI;KIAA1324;FLNC;RGL1
CBEPA (mouse)	11/1764	0.641221	0.841722	0.805881	-0.138858	SVIL;DACH1;AMY2B;ADHFE1;ST7;SPOCK3;SLITRK6;KCNQ5;KCTD12;SULF1;RGL1
KLF13 (human)	9/1453	0.643293	0.841722	0.813734	-0.140211	PRKCH;LBH;ASXL3;PMP22;PDCD4;DNAJC5G;KCNA5;KCTD12;GLI3
CREM (human)	4/662	0.650703	0.845903	0.698574	-0.116907	TCF21;EMP2;RGL1;LYST
GLI2 (human)	9/1465	0.652921	0.845903	0.847432	-0.141819	NETO1;BNC1;PMP22;HOXB3;KCTD12;AFF3;HCFC2;GLI3;CACNA1G
RXRA (mouse)	3/507	0.66314	0.854931	0.686018	-0.107523	JAG1;CYP1A1;CLGN
Klf4 (mouse)	1/163	0.666921	0.855611	1.14309	-0.178252	PLK2
ELF3 (human)	9/1488	0.670964	0.856619	0.909057	-0.140687	CSRP1;FZD4;FRZB;KIF26B;PDCD4;EMP2;PROX1;AFF3;ST3GAL1
CACYBP (mouse)	10/1656	0.677682	0.861016	0.939743	-0.140625	NTRK2;NETO1;ASXL3;CCDC146;CYP1A1;PDCD4;KCNQ5;SULF1;SOX5;PPIL6
MIR138 (human)	8/1356	0.692919	0.867799	0.882745	-0.125169	INPP4B;PRRX1;ACCN2;GBE1;KIAA1984;TCP11L2;RGL1;PPIL6
NRF1 (mouse)	10/1676	0.692061	0.867799	0.9592	-0.13601	SESN3;DENND5B;GTF2IRD2;ST8SIA1;ACCN2;TNFRSF19;DNAJC5G;LYST;CLGN;SOX5
FEV (human)	1/172	0.686481	0.867799	1.10519	-0.156712	SEMA3D
APEX1 (human)	8/1373	0.706012	0.872342	0.910342	-0.124329	GLT25D2;ZNF781;SLC6A16;DENND5B;PROS1;KIAA1324;FIGNL2;PPP1R12B
USF1 (mouse)	7/1219	0.713131	0.872342	0.960012	-0.131113	SEMA3D;PAPPA;DDX26B;PRKD1;PPP1R12B;IL6ST;RIN2
FOXA1 (mouse)	10/1705	0.712215	0.872342	0.97844	-0.13363	LBH;CTTNBP2;ST7;BOC;WDR52;PLD1;LRP1B;F2RL2;ADAMTS6;CLGN
YY1 (mouse)	10/1700	0.7088	0.872342	1.02523	-0.140019	ROBO2;KIF26B;HEG1;PDCD4;KCNQ5;CCDC3;HCFC2;YAF2;ZHX1;LRP1B
NFKB1 (mouse)	20/3284	0.709452	0.872342	1.19473	-0.163169	ROBO2;NIPSNAP3A;JAG1;SLC30A3;PLCL2;CCDC146;TNFRSF19;LTBP1;ARHGAP6;RERG;CACNA1G;BAMBI;ASXL3;MGP;BOC;HOXB3;ST3GAL6;IL6ST;YPEL2;CPEB4
NFIA (human)	8/1416	0.737508	0.8858	0.996341	-0.120821	CDC20B;EDN1;DNAJC6;PMP22;GPR126;HCFC2;DYNC1I1;SULT1C4
RXRA (human)	8/1422	0.741716	0.8858	1.00317	-0.121648	PRKCH;CSRP1;DOK4;FLNC;ADAMTS12;PPP1R12B;LYST;F2RL2
NFYA (mouse)	10/1748	0.74054	0.8858	1.04012	-0.126129	GHR;SESN3;SPTLC3;ADHFE1;PMP22;PLEKHA6;GXYLT2;SULF1;IL6ST;CACNA1G
REL (mouse)	10/1752	0.743078	0.8858	1.10141	-0.133562	EDN1;NXPH2;AMY2B;ODAM;IL1R1;SLITRK6;HOXB3;ST3GAL6;GXYLT2;MLLT3
POU1F1 (mouse)	10/1754	0.744341	0.8858	1.11411	-0.135102	GUCY1B3;SVIL;GTF2IRD2;PROS1;TET2;MLLT3;ADAMTS12;RGL1;RCSD1;DGKI
PRDM1 (mouse)	1/196	0.733232	0.8858	1.13974	-0.13821	ADAMTS6
Arnt::Ahr (mouse)	1/207	0.752274	0.891208	1.19164	-0.13725	ADHFE1
CEBPD (human)	8/1495	0.789221	0.930785	1.08944	-0.0781423	INPP4B;MMP15;PROS1;PROX1;ACPP;FREM2;CACNA1G;C20ORF132
NRF1 (human)	7/1356	0.808073	0.948764	1.09912	-0.0578085	PRKCH;ZADH2;BOC;WDR52;PDCD4;RGL1;CACNA1G
FOS (human)	7/1394	0.829674	0.961252	1.12167	-0.0443263	SH3RF2;CTSO;MGP;FLNC;C9ORF150;RGL1;ARHGAP6
SREBF1 (mouse)	9/1735	0.827747	0.961252	1.14815	-0.045373	GHR;SESN3;SPTLC3;DNAJC6;ADHFE1;PMP22;PLEKHA6;SULF1;CACNA1G
ELK1 (mouse)	9/1727	0.823744	0.961252	1.17129	-0.0462874	NXPH2;GTF2IRD2;TNFRSF19;BOC;FITM2;CNTN4;PPP1R12B;ST3GAL1;DGKI
EGR1 (human)	3/681	0.837031	0.961306	1.07121	-0.0422725	LHFP;DOK6;FLNC
SREBF1 (human)	14/2587	0.833405	0.961306	1.28186	-0.0505849	ABCA1;CCBE1;CLSTN2;SLC6A16;MLLT3;ARHGAP6;RERG;CSRP1;DOK4;FRZB;MMP15;ACCN2;KIAA1324;CPE
GFI1 (human)	7/1427	0.846855	0.96836	1.15247	-0.0370533	PRKCH;GTF2IRD2;SLC6A16;PROS1;FITM2;ACPP;DYNC1I1
TP63 (human)	7/1443	0.854675	0.96996	1.14003	-0.034772	PRKCH;JAG1;CSRP1;SLC6A16;ACPP;LYST;C20ORF132
KLF5 (human)	7/1445	0.85563	0.96996	1.19076	-0.0363194	NETO1;FZD4;SMAD9;ZNF503;FLNC;GPR155;GLI3
MYOD1 (mouse)	8/1672	0.877266	0.98312	1.27842	-0.0217645	FRMD6;SEMA3D;DOK6;CCDC146;DNAJC5G;FBN1;YPEL2;PPIL6
MYOG (mouse)	8/1675	0.878453	0.98312	1.33934	-0.0228015	MMP15;IL1R1;BNC1;KIF26B;KCNA5;PPP1R12B;PLD1;WDR78
PITX2 (human)	19/3528	0.873361	0.98312	1.46457	-0.0249335	CTTNBP2;SLC6A16;KCNJ13;PROS1;WDR52;AFF3;RERG;BAMBI;NOSTRIN;CPE;ATG4A;KCTD12;ACPP;KIFAP3;PPP1R12B;YAF2;RIN2;GPR155;FREM2
ELF5 (mouse)	2/556	0.888623	0.986109	1.06321	-0.0148724	IL1R1;PTN
ESR1 (human)	7/1513	0.885192	0.986109	1.27886	-0.017889	FRMD6;CSRP1;SPTLC3;GTF2IRD2;FLNC;GTF2IRD2B;F2RL2
CACYBP (human)	6/1350	0.892997	0.9868	1.2643	-0.0168004	SVIL;NETO1;CYP1A1;ZNF503;CXXC4;CACNA1G
FOXO3A (mouse)	2/597	0.910798	0.999464	1.14944	-0.000616655	PDCD4;CLGN
CREB1 (mouse)	3/849	0.925649	0.999464	1.24046	-0.000665488	GLT25D2;DNAJC6;PLAGL1
ZNF354C (human)	5/1430	0.965118	0.999464	1.24903	-0.000670088	DNAJC6;AMY2B;GPR126;LCP1;MAPK4
NR1H2 (human)	1/479	0.960683	0.999464	1.25721	-0.000674475	PPP1R12B
Sox2 (mouse)	8/1797	0.919311	0.999464	1.27625	-0.00068469	DGKB;AMY2B;DLX5;DDX26B;ST7;TET2;NAALAD2;PPP1R12B
RORB (human)	3/1035	0.970915	0.999464	1.34596	-0.000722089	PLAGL1;KIAA1324;CCDC3
IKZF1 (human)	5/1373	0.955179	0.999464	1.36053	-0.000729905	GTF2IRD2;FITM2;ACPP;GTF2IRD2B;C11ORF9
NR1I2 (human)	5/1387	0.957834	0.999464	1.37163	-0.000735857	ADHFE1;TRANK1;YAF2;BBS5;RERG
NR2F1 (human)	3/1073	0.976166	0.999464	1.38997	-0.0007457	PLAGL1;KIAA1324;CCDC3
TFAP2A (mouse)	7/1663	0.932966	0.999464	1.39132	-0.000746422	SLC30A3;MMP15;KCNQ5;GXYLT2;ADAMTS12;ST3GAL1;CXXC4
IKZF1 (mouse)	7/1674	0.935667	0.999464	1.40529	-0.00075392	NXPH2;TNFRSF19;NAALAD2;ARID5B;SMAD9;FLNC;SULF1
STAT5B (mouse)	7/1729	0.947792	0.999464	1.40874	-0.000755769	TANC1;GTF2IRD2;RGS13;PDCD4;WDR52;ACPP;GPR155
TFAP2D (human)	4/1324	0.978921	0.999464	1.44427	-0.000774831	JAG1;NOSTRIN;FITM2;ERP27
TP53 (mouse)	3/1266	0.991603	0.999464	1.48446	-0.000796392	FRMD6;CCDC146;DNAJC5G
ZBTB7A (human)	4/1373	0.983465	0.999464	1.49103	-0.000799913	SVIL;ASXL3;SMAD9;CCDC3
TCF3 (human)	3/1428	0.996625	0.999464	1.50092	-0.00080522	DOK4;HMGCLL1;C11ORF9
NR1H3 (human)	3/1385	0.995689	0.999464	1.51138	-0.000810834	NOSTRIN;BBS5;F2RL2
SNAI2 (human)	3/1428	0.996625	0.999464	1.51468	-0.000812603	DOK4;HMGCLL1;C11ORF9
TBX5 (mouse)	5/1663	0.988146	0.999464	1.52454	-0.000817894	MMP15;DGKB;PROS1;KIFAP3;RCSD1
SNAI1 (human)	3/1428	0.996625	0.999464	1.5266	-0.000818997	DOK4;HMGCLL1;C11ORF9
CRX (human)	2/1362	0.999073	0.999464	1.56728	-0.000840823	SLC6A16;ACPP
RARA (human)	2/1379	0.999168	0.999464	1.57718	-0.000846134	MGP;BBS5
PITX1 (human)	2/1448	0.999464	0.999464	1.60565	-0.00086141	PROS1;MLLT3
FOXF2 (human)	2/1379	0.999168	0.999464	1.61283	-0.000865259	ZNF781;CSRP1
PPARG (human)	16/3580	0.973643	0.999464	1.67332	-0.000897709	EDN1;SLC6A16;CTTNBP2;GTF2IRD2;LHFP;PROS1;TET2;SMAD9;NEDD9;AFF3;ARHGAP6;CDC20B;SH3RF2;DOK6;ERP27;YPEL2

## Sheet: Cluster 3
Term	Overlap	P-value	Adjusted P-value	Z-score	Combined Score	Genes
HINFP (human)	66/3047	1.13553e-09	3.57691e-07	-1.60916	23.8857	GABRB3;PCSK1;NRK;LY75;ETS1;ACTG2;HERC5;ATCAY;CAMKV;PPP4R4;MYC;DNMT3B;KIF1A;AP1S3;PIM2;CD36;HIST1H1A;PRKG1;TIMP4;MGC87042;CBR1;SERPINB4;COBL;SHISA9;RINT1;TUBB2B;TLCD1;SLC27A2;STEAP2;HPGD;PRUNE2;LRRC17;FAM129A;ITPR3;NALCN;GLB1L3;PDZD4;FAM124A;ORC1;GNG4;DSEL;SPP1;OTX2;TAC1;KIAA1804;FOXB1;FZD5;MLKL;GABRA5;C13ORF38;CKMT1A;MACC1;MOCOS;SLC4A11;NMI;PARP14;FBXL13;NELL2;PSAT1;VEPH1;SCGB3A2;CNTN1;TRIM36;CD9…
FOXC1 (human)	174/13142	1.27428e-07	2.00698e-05	-1.82456	19.7349	KCNG3;FRMPD4;DSCC1;MPV17L;LY75;IRS4;SNORD1A;SNORD1B;GRPR;CLU;FGF2;AADACL3;GPR176;ATCAY;CHEK2;MYC;PPP4R4;MYB;KIF5A;ENPP1;CHAC1;PIM2;C3ORF14;MGC87042;CALN1;C9ORF135;SP110;HIST1H2AJ;PIPOX;PLA2G16;WBSCR17;RNF125;CTAGE4;SCNN1A;SNORA74A;RAB39;SLC27A2;GRIA1;CRABP1;TNFRSF11B;AK5;NALCN;ADAMTS16;DPP4;UGT8;C12ORF56;CYP2B6;FUT9;HESX1;OTX2;SNORA56;KIAA1804;TAC1;SYT1;FZD5;MLKL;ST8SIA3;HTR1D;SLC4A11;A2ML1;KIAA1…
STAT3 (human)	53/2759	2.80025e-06	0.000294027	-1.57582	12.8143	GABRB3;KCNG3;GLDC;HIST1H1T;CLU;ETS1;CHRDL1;AADACL3;CHEK2;KIF5A;CD36;PIM2;MGC87042;CHST9;C9ORF135;CR2;MME;GABRG1;C6ORF132;CDCP1;INA;STEAP2;SLC22A3;HPGD;LUZP2;SLC43A1;SAMHD1;SLC7A3;UGT8;PDZD4;FUT9;NRIP3;OTX2;GPC4;TAC1;VAT1L;MACC1;ST8SIA3;TFPI2;EPHX3;PARP14;TTC39C;SYT6;IL6;PPP2R2C;PSAT1;SEMG1;TAF4B;TRIM36;FGFR4;SP140L;KLKB1;SNTB1
LEF1 (human)	75/4658	1.08785e-05	0.000856684	-1.45629	10.285	GABRB3;CNTNAP3;PCSK1;TNFAIP6;GLDC;MT1M;LY75;IRS4;SLC7A11;IFI30;GRPR;FGF2;HERC5;AADACL3;ACOXL;KIF5A;MYB;DNMT3B;ENPP1;PIM2;CHAC1;HIST1H1A;PRKG1;TIMP4;MGC87042;CPT1A;DTX3L;TACR3;PIPOX;IRAK3;TC2N;CCNA1;PLA2G16;AIM1;RNF125;CDCP1;DPPA4;DPPA5;EPHA1;STEAP1;SLC27A2;STEAP2;GRIA1;FAM129A;TNFRSF11B;AK5;PPM1E;LRP8;GLB1L3;SLC7A3;GNG4;C10ORF96;SLITRK3;NRIP3;OTX2;SLC38A5;VAT1L;FOXB1;SYT1;GABRA5;TMEM132B;HTR1D;A2…
RBPJ (human)	34/1535	1.38859e-05	0.00087481	-1.73045	12.185	PCSK1;SLC43A1;FAM129A;AK5;ETS1;CHRDL1;ACTG2;GLB1L3;AADACL3;ACOXL;FAM124A;DSEL;KIF5A;NRIP3;BEND4;GPC4;PRODH;SLC38A5;MGC87042;C9ORF135;CR2;C13ORF38;NMI;NELL2;DNM3;GAP43;CDCP1;PPP2R2C;VEPH1;SLCO4C1;CNTN1;CD9;FGFR4;SNTB1
USF2 (human)	63/3792	2.77274e-05	0.00145569	-1.51238	9.87927	IFITM1;FRMPD4;LAMC2;CHRDL1;ACTG2;HERC5;AADACL3;CAMKV;CHAC2;NEFM;CD36;AP1S3;CHAC1;PRKG1;CALN1;C9ORF135;CPT1A;ZNF483;CR2;KCND2;COBL;IRAK3;TACR1;RGMB;CCNA1;SCNN1A;ZFP42;DPPA5;SMPDL3B;EPHA1;SLC27A2;ARHGEF5;THBS2;CUZD1;LRP8;ADAMTS16;GNA14;C10ORF96;ZSCAN10;NRIP3;TAC1;KIAA1804;SLC38A5;FZD5;SYT1;GABRA5;C13ORF38;CCDC109B;MOCOS;CABLES1;A2ML1;KIAA1244;FBXL13;ASS1;INHBE;PPP2R2C;VEPH1;SCGB3A2;TAF4B;FAM54A;FGF…
YY1 (human)	89/6042	3.90689e-05	0.0017581	-1.61296	10.2318	CNTNAP3;EIF4A2;PIWIL2;GABRB3;PCSK1;SNORD1A;SLC7A11;CLU;CHEK2;ENPP1;KIF1A;CD36;C3ORF14;RNU5D;CHST9;CR2;ZNF483;ZYG11A;UNC13A;KCND2;MAMDC2;TACR1;TEX15;RGMB;LOC100131138;FAM101B;PLA2G16;GAP43;TUBB2B;NR5A2;TUBB2A;VSNL1;DPPA3;CTAGE4;SNORA74A;RAB39;CHST4;STEAP2;LRRC17;TNFRSF11B;AK5;HSD17B6;THBS2;ARNTL2;SLC7A3;UGT8;C12ORF56;FAM124A;FUT9;C10ORF96;SPP1;SNORD78;BEND4;OTX2;SRY;PRODH;RNF133;AP1M2;PCK2;ZNF860;…
TEAD1 (human)	31/1547	0.000202555	0.00710409	-1.65912	8.20781	GRIA1;SLC22A3;MEGF10;IRS4;HSD17B6;TRHDE;UGT8;GYLTL1B;CAMKV;GCNT4;OTX2;CD36;HIST1H1A;VAT1L;SLC38A5;MLKL;KCND2;SP110;TMEM132B;MACC1;MAMDC2;GABRA3;A2ML1;INHBE;FAM101B;IL6;CDCP1;NR5A2;SCNN1A;PLP1;SNTB1
ETS1 (human)	72/4827	0.000202974	0.00710409	-1.63477	8.08733	GABRB3;PCSK1;TNFAIP6;GLDC;NRK;RASGRF2;SLC7A11;ETS1;ALDH1L2;ACTG2;LRRC2;MYB;DNMT3B;CHAC2;CD36;HIST1H1A;PRKG1;C3ORF14;ZNF560;CR2;MME;SP110;IRAK3;TACR1;TC2N;GABRG1;LOC100131138;DNM3;HPDL;CCNA1;PLA2G16;FAM101B;AIM1;VSNL1;SCNN1A;ZFP42;MT1H;TLCD1;RGS7BP;SMPDL3B;EPHA1;SLC27A2;HPGD;FAM129A;LRP8;UGT8;SOCS1;SLITRK3;NRIP3;OTX2;GPC4;KIAA1804;RNF133;PSITPTE22;SYT1;SLC4A11;PARP14;PARP12;SYT6;MIR222;PPP2R2C;MIR…
CRTC1 (human)	24/1086	0.000281537	0.0077593	-1.62369	7.88929	CR2;SYT1;KCND2;LUZP2;MPV17L;TFPI2;A2ML1;KIAA1244;LRRC2;ACTG2;NELL2;IL6;CAMKV;ORC1;CTAGE4;DSEL;VEPH1;SLCO4C1;SPP1;NRIP3;FAM54A;SRY;FGFR4;PRKG1
ATF2 (human)	30/1517	0.000320225	0.0077593	-1.58308	7.69196	LUZP2;LY75;CLU;TRHDE;FGF2;CHRDL1;LRP8;UGT8;AADACL3;FGD4;OTX2;CD36;PRODH;PRKG1;TIMP4;FOXB1;KCND2;SP110;GABRA5;TMEM132B;CABLES1;TACR1;FBXL13;PARP12;MGAT4C;GAP43;RNF125;CTH;VEPH1;CD9
RUNX1 (human)	60/3857	0.000276056	0.0077593	-1.4729	7.1566	CNTNAP3;PIWIL2;GABRB3;TNFAIP6;MEGF10;DSCC1;MT1M;IRS4;LY75;CLU;ETS1;CHRDL1;LRRC2;ATCAY;CAMKV;CHEK2;CD36;CHAC1;HIST1H1A;CALN1;ZYG11A;TC2N;DNM3;GAP43;CDCP1;DPPA3;SCNN1A;TLCD1;CHST4;GRIA1;CRABP1;LRRC17;FAM129A;CUZD1;PPM1E;LRP8;SLC7A3;CYP2B6;FAM124A;GNG4;OTX2;VAT1L;SLC38A5;SYT1;C13ORF38;GABRA5;CKMT1A;CCDC109B;EPHX3;PARP14;NELL2;CTH;VEPH1;SEMG1;PLP1;HLA-DRA;CD9;FAM54A;RAB17;SNTB1
TCF4 (human)	64/4210	0.000308356	0.0077593	-1.37798	6.69541	GABRB3;EIF4A2;PCSK1;KCNG3;TNFAIP6;FRMPD4;LY75;HIST1H1T;SLC7A11;ETS1;FGF2;LRRC2;ATCAY;MYC;DNMT3B;ENPP1;CD36;TRIM22;PRKG1;CPT1A;SP110;MAMDC2;TC2N;RGMB;GABRG1;CCNA1;GAP43;TUBB2B;RNF125;DPPA4;CTAGE4;DPPA3;SCNN1A;CHST4;LRRC17;ITPR3;TNFRSF11B;NALCN;GLB1L3;ADAMTS16;UGT8;GNA14;DRAM1;FUT9;HESX1;OTX2;TAC1;RNF133;VAT1L;SYT1;CCDC109B;EPHX3;CABLES1;FBXL13;TTC39C;ASS1;MGAT4C;IL6;SEMG1;POLR3G;TAF4B;TRIM36;HLA-D…
GATA2 (human)	127/9985	0.000398157	0.00836129	-1.59397	7.62577	GLDC;MT1M;IRS4;SNORD1A;SNORD1B;GRPR;ETS1;HERC5;ATCAY;CHEK2;MYC;MYB;ENPP1;CHAC2;CHAC1;PIM2;C3ORF14;MGC87042;CALN1;SP110;VASH2;TC2N;LOC100131138;RINT1;PLA2G16;RNF125;ZFP42;SCNN1A;SLC22A3;CRABP1;ITPR3;AK5;TRHDE;KIAA0040;ADAMTS16;C12ORF56;PDZD4;UGT8;CYP2B6;FUT9;HESX1;OTX2;KIAA1804;PRODH;SLC38A5;PCK2;SYT1;MLKL;C13ORF38;TFPI2;HTR1D;SLC4A11;EPHX3;NMI;PARP14;SYT6;FGF19;NFE2L3;TAF4B;HLA-DRA;FGF12;PIWIL2;G…
CBEPB (human)	44/2598	0.000379761	0.00836129	-1.47883	7.07495	PIWIL2;GABRB3;LUZP2;MPV17L;SLC7A11;FGF2;COCH;SLC7A3;UGT8;PDZD4;GPR176;ORC1;GNG4;SPP1;OTX2;CD36;SRY;HIST1H1A;PRKG1;RNF133;MGC87042;CHST9;SERPINB4;ZNF560;SYT1;KCND2;GABRA5;C1ORF182;VASH2;EPHX3;IRAK3;NMI;FBXL13;SHISA9;FHDC1;TTC39C;MGAT4C;GAP43;CTH;CYP2S1;VEPH1;SCGB3A2;FGFR4;SLC27A2
HNF1A (human)	34/1855	0.000492241	0.0092273	-1.51989	7.1216	LRRC17;FAM129A;LY75;ITPR3;SLC7A11;SAMHD1;NALCN;CLU;ETS1;CHRDL1;GPR176;FAM124A;GNG4;WIF1;MYB;OTX2;KIF1A;PRKG1;VAT1L;TIMP4;CHST9;SP110;HTR1D;VASH2;FHDC1;GAP43;IL6;TUBB2B;PPP2R2C;VEPH1;TRIM36;MDGA2;SLC27A2;SNTB1
POU2F2 (human)	46/2792	0.000497981	0.0092273	-1.44672	6.77875	GRIA1;GABRB3;TNFAIP6;LUZP2;FAM129A;ITPR3;LAMC2;TNFRSF11B;HSD17B6;SLC7A11;GRPR;CLU;ETS1;HERC5;FGD4;CYP2B6;FUT9;WIF1;DSEL;MYC;ZSCAN10;MYB;SPP1;HESX1;ENPP1;OTX2;PIM2;TAC1;RNF133;FOXB1;CBR1;ZNF483;CPT1A;SP110;GABRA5;MACC1;A2ML1;TC2N;FBXL13;SYT6;NR5A2;CTAGE4;VEPH1;EPHA1;SLC27A2;STEAP2
HMGA1 (human)	27/1379	0.000743815	0.0130168	-1.54773	6.7195	GRIA1;CNTNAP3;HPGD;TNFAIP6;MPV17L;SLC7A11;GRPR;GPR176;ATCAY;CHAC2;CD36;TIMP4;CHST9;ZNF560;MME;DTX3L;MAMDC2;GABRA3;RGMB;MGAT4C;DNM3;SEMG1;TRIM36;CHST4;MDGA2;INA;STEAP2
Prrx2 (mouse)	37/2205	0.00135799	0.0225141	-1.58527	6.0139	GRIA1;PIWIL2;CRABP1;TNFRSF11B;SLC7A11;GRPR;SAMHD1;GLB1L3;VSIG10;FGD4;SRY;TIMP4;GABRQ;CR2;CPT1A;SP110;GABRA5;MOCOS;ST8SIA3;TACR3;CABLES1;TC2N;PARP12;SYT6;GABRG1;DNM3;MGAT4C;RINT1;PLA2G16;CCNA1;VSNL1;VEPH1;ZFP42;SNORA74A;RAB17;CCL28;FGF12
STAT5B (human)	26/1379	0.00157198	0.0247586	-1.51277	5.5951	NRK;FAM129A;CLU;FGF2;GLB1L3;CHEK2;HESX1;BEND4;GCNT4;CD36;KIF1A;CALN1;CHST9;CBR1;GABRA5;CKMT1A;ST8SIA3;TACR3;NMI;GABRG1;AIM1;TRIM36;HLA-DRA;CLC;MDGA2;STEAP2
ZBTB16 (human)	28/1572	0.00234948	0.0352423	-1.48994	4.98461	GRIA1;GLDC;LRRC17;ETS1;CHRDL1;LRP8;LRRC2;SLC7A3;UGT8;CYP2B6;ORC1;OTX2;HIST1H1A;TIMP4;CHST9;FOXB1;SP110;GABRA5;GABRA3;VASH2;TC2N;MGAT4C;RNF125;PSAT1;CYP2S1;ZFP42;CD9;FGF12
FOXA1 (human)	26/1457	0.0032674	0.0467832	-1.50512	4.60903	GABRB3;MPV17L;FGF2;ALDH1L2;VSIG10;KIAA0040;ATCAY;GNG4;WIF1;ZSCAN10;MYB;AP1S3;TAC1;MGC87042;ZNF860;CHST9;CR2;KCND2;SP110;HTR1D;FAM101B;C6ORF132;TRIM36;RAB39;SMPDL3B;STEAP2
IRF8 (human)	27/1550	0.00377036	0.0516375	-1.45651	4.31639	EIF4A2;PCSK1;MEGF10;DSCC1;AK5;IFI30;ACTG2;GLB1L3;AADACL3;PDZD4;DSEL;TAC1;PRKG1;C3ORF14;MME;KCND2;MACC1;EPHX3;NMI;PARP14;SHISA9;NELL2;DNM3;SCGB3A2;CLC;EPHA1;INA
SPI1 (human)	28/1638	0.00411708	0.0523227	-1.53051	4.51549	GABRB3;HPGD;ETS1;ARNTL2;UGT8;CYP2B6;CHEK2;MYB;SPP1;KIF1A;PRKG1;RNF133;C3ORF14;CR2;MME;GABRA5;TFPI2;NMI;MGAT4C;FAM101B;CDCP1;VEPH1;SCNN1A;SCGB3A2;CLC;RAB17;MDGA2;ARHGEF5
POU1F1 (human)	25/1408	0.0041526	0.0523227	-1.43934	4.24651	EIF4A2;UGT8;C10ORF96;SPP1;HESX1;BEND4;OTX2;CD36;SRY;AP1S3;RNF133;AP1M2;SERPINB4;CR2;SYT1;DTX3L;GABRA5;TTC39C;NR5A2;CTAGE4;VEPH1;SEMG1;FAM54A;MDGA2;DOCK2
NFIA (human)	25/1416	0.00445422	0.0539646	-1.4416	4.20866	GUCY2C;IFI30;GRPR;THBS2;CLU;LRP8;AADACL3;FAM124A;CAMKV;DNMT3B;PIM2;PRODH;PCK2;SP110;PIPOX;CABLES1;TTC39C;SYT6;PPP2R2C;NFE2L3;TRIM36;MT1H;CHST4;MDGA2;SLC27A2
NKX2-8 (human)	8/256	0.00481131	0.0554802	-1.54891	4.47902	PLA2G16;FGD4;VSNL1;EPHX3;SP140L;SLC27A2;RNF133;GABRG1
NFYA (human)	39/2549	0.00493157	0.0554802	-1.31801	3.81133	GABRB3;TNFAIP6;LRRC17;IRS4;FAM129A;TNFRSF11B;IFI30;GRPR;ETS1;ACTG2;LRRC2;SLC7A3;FAM124A;CHEK2;OTX2;CHAC1;HIST1H1A;TRIM22;VAT1L;CALN1;CHST9;FOXB1;ZNF483;ZYG11A;SP110;C13ORF38;CCDC109B;VASH2;IRAK3;NELL2;DNM3;CCNA1;GAP43;VEPH1;SEMG1;ZFP42;TRIM36;HLA-DRA;FAM54A
STAT1 (human)	28/1667	0.00519294	0.0564061	-1.36149	3.91452	GRIA1;MEGF10;GLDC;LRRC17;HERC5;DRAM1;FAM124A;FUT9;CHEK2;PPP4R4;MYB;BEND4;CD36;HIST1H1A;VAT1L;PCK2;SP110;MOCOS;COBL;FAM101B;CTAGE4;VEPH1;KIT;MT1H;SP140L;SLC27A2;FGF12;VGLL3
POU2F2 (mouse)	29/1754	0.00552968	0.0568728	-1.31526	3.77076	RASGRF2;ITPR3;SLC7A11;CUZD1;ACOXL;CAMKV;DSEL;SPP1;BEND4;OTX2;PIM2;SLC38A5;CHST9;UNC13A;SP110;GABRA5;SLC4A11;IRAK3;NMI;GABRG1;MGAT4C;AIM1;DPPA3;VEPH1;ZFP42;KIT;POLR3G;EPHA1;FGF12
TBP (human)	38/2486	0.005597	0.0568728	-1.2196	3.49652	CNTNAP3;MEGF10;GLDC;MT1M;LY75;LAMC2;SLC7A11;SAMHD1;GRPR;GPR176;C10ORF96;MYB;SPP1;HESX1;ENPP1;BEND4;NEFM;CD36;C3ORF14;MGC87042;CPT1A;ZNF560;ST8SIA3;CABLES1;IRAK3;NMI;TC2N;PARP12;MGAT4C;GAP43;CTAGE4;PLP1;CLC;CCL28;FGF12;STEAP2;KLKB1;VGLL3
NR2F1 (human)	20/1073	0.00604852	0.0595401	-1.44244	4.06928	GUCY2C;CHST9;FOXB1;SERPINB4;TNFAIP6;GABRA3;HSD17B6;PARP12;MGAT4C;FAM101B;DRAM1;GYLTL1B;CYP2B6;PPP2R2C;VSNL1;ORC1;CTH;NMU;PLP1;BEND4
RORB (human)	19/1035	0.00857189	0.0818226	-1.40809	3.52473	GUCY2C;CHST9;FOXB1;SERPINB4;TNFAIP6;GABRA3;HSD17B6;PARP12;MGAT4C;DRAM1;GYLTL1B;CYP2B6;PPP2R2C;VSNL1;ORC1;CTH;NMU;PLP1;BEND4
MIR133B (human)	25/1500	0.00888803	0.082345	-1.33071	3.32257	NECAB1;SLC22A3;SLC43A1;TNFRSF11B;IFI30;ACTG2;SLC7A3;FAM124A;GNG4;NEFM;CD36;VAT1L;CHST9;ZNF560;PIPOX;A2ML1;SYT6;NELL2;CTH;SCNN1A;CNTN1;CD9;TLCD1;SP140L;SLC27A2
RELB (human)	24/1469	0.0128089	0.114625	-1.30089	2.81785	FOXB1;SYT1;MEGF10;SP110;GABRA5;MAMDC2;HTR1D;TFPI2;IRAK3;HSD17B6;SHISA9;GABRG1;NELL2;DRAM1;PPP2R2C;KIF5A;SCNN1A;ZFP42;SCGB3A2;TRIM36;CD36;PRKG1;VAT1L;SNTB1
MEF2A (human)	40/2800	0.0131	0.114625	-1.18783	2.57294	GUCY2C;PCSK1;LRRC17;TNFRSF11B;ZDHHC22;SLC7A11;VSIG10;UGT8;ACOXL;ENPP1;OTX2;CD36;SRY;PRODH;KIAA1804;PRKG1;RPRM;CHST9;FOXB1;ZYG11A;DTX3L;SP110;GABRA5;ST8SIA3;HTR1D;KIAA1244;PARP12;MGAT4C;NELL2;HPDL;FAM101B;CCNA1;PLA2G16;VEPH1;CNTN1;TRIM36;MDGA2;FGFR4;EPHA1;STEAP2
FOXJ1 (human)	24/1484	0.0143044	0.121781	-1.27767	2.69019	SERPINB4;SP110;CRABP1;PIPOX;ITPR3;IRAK3;HSD17B6;RGMB;CHRDL1;VSIG10;ACTG2;PLA2G16;C6ORF132;RNF125;GYLTL1B;DRAM1;PSAT1;SPP1;NEFM;KIF1A;MDGA2;FGFR4;EPHA1;TRIM22
Sox5 (mouse)	14/728	0.0157871	0.127429	-1.42338	2.93245	ZYG11A;BCL11A;ST8SIA3;LY75;TEX15;TRHDE;MGAT4C;ORC1;ZFP42;CNTN1;FGF12;CCL28;ARHGEF5;RPRM
CREM (human)	13/662	0.0168846	0.127429	-1.33914	2.7589	MME;HTR1D;IRAK3;TACR1;VEPH1;SLCO4C1;NMU;OTX2;CHAC1;FGFR4;TAC1;C3ORF14;TRIM22
TBX5 (mouse)	26/1663	0.0161889	0.127429	-1.2111	2.4951	GABRB3;TNFAIP6;GLDC;TNFRSF11B;CLU;GLB1L3;ACTG2;ADAMTS16;PDZD4;DRAM1;GNG4;ZSCAN10;NRIP3;KIF1A;AP1M2;PCK2;BCL11A;TMEM132B;TACR1;FBXL13;FHDC1;CCNA1;DPPA4;PPP2R2C;PSAT1;DOCK2
HMGA1 (mouse)	27/1748	0.0165524	0.127429	-1.18593	2.44326	GUCY2C;KCNG3;RASGRF2;IRS4;HSD17B6;GRPR;NALCN;ALDH1L2;ARNTL2;DRAM1;ATCAY;BEND4;CD36;PIM2;SRY;PRKG1;VASH2;SLC4A11;DNM3;NELL2;MGAT4C;CCNA1;IL6;RNF125;VSNL1;ZFP42;SCGB3A2
REL (mouse)	27/1752	0.0169905	0.127429	-1.15545	2.38045	CNTNAP3;LUZP2;DSCC1;HSD17B6;ADAMTS16;GYLTL1B;CAMKV;MYB;SLITRK3;CHAC1;VAT1L;PRKG1;ATOH1;CPT1A;SYT1;MAMDC2;MOCOS;NR5A2;PPP2R2C;ZFP42;TRIM36;KCTD14;RAB17;MDGA2;INA;CCL28;ARHGEF5
MZF1_1-4 (human)	38/2705	0.0196371	0.143853	-1.40064	2.71579	CNTNAP3;GRIA1;C21ORF88;MT1M;LY75;IRS4;SNORD1A;SNORD1B;ITPR3;IFI30;GRPR;FGF2;VSIG10;ARNTL2;GLB1L3;SLC7A3;HERC5;ACOXL;CHEK2;PPP4R4;DNMT3B;NEFM;CD36;PCK2;SERPINB4;SNORD12C;GABRA5;C1ORF182;SYT6;INHBE;FAM101B;PLA2G16;PLP1;CD9;TLCD1;CHST4;FGF12;STEAP2
NFIC (human)	57/4403	0.020939	0.144776	-1.17066	2.26237	CNTNAP3;GABRB3;PCSK1;TNFAIP6;FRMPD4;GLDC;IRS4;LAMC2;ETS1;CHRDL1;LRRC2;HERC5;AADACL3;CHEK2;PPP4R4;NEFM;CHAC1;HIST1H1A;TRIM22;CALN1;RNU5D;GABRG1;DNM3;FAM101B;GAP43;C6ORF132;TUBB2B;RNF125;TUBB2A;MT1H;DOCK2;EPHA1;INA;ARHGEF5;SLC43A1;LRRC17;FAM129A;TRHDE;CUZD1;ARNTL2;SLC7A3;ADAMTS16;NRIP3;OTX2;VAT1L;GABRQ;C13ORF38;CCDC109B;CABLES1;FBXL13;TTC39C;MGAT4C;CTH;VEPH1;TAF4B;HLA-DRA;FAM54A
JUN (human)	41/2976	0.0207002	0.144776	-1.07581	2.07907	GABRB3;PCSK1;NECAB1;HPGD;TNFAIP6;NRK;ZDHHC22;IFI30;ETS1;FGF2;SLC7A3;DPP4;AADACL3;MYB;ENPP1;CD36;TAC1;RNF133;AP1M2;CALN1;ZNF560;MLKL;SP110;CKMT1A;GABRA3;PIPOX;CABLES1;NMI;TC2N;PARP12;IL6;NR5A2;PPP2R2C;DPPA4;CYP2S1;VEPH1;FAM54A;RAB17;CHST4;STEAP2;SNTB1
SRF (human)	46/3420	0.0211418	0.144776	-1.01776	1.96689	GABRB3;TNFAIP6;MEGF10;GLDC;PRUNE2;LRRC17;PPM1E;NALCN;ACTG2;LRRC2;SLC7A3;ORC1;C10ORF96;NRIP3;GCNT4;CHAC2;OTX2;SRY;CHAC1;PRODH;HIST1H1A;VAT1L;TIMP4;CALN1;GABRQ;ZYG11A;C13ORF38;CKMT1A;CCDC109B;MAMDC2;EPHX3;RGMB;PARP14;NELL2;DNM3;FAM101B;RINT1;GAP43;VEPH1;SEMG1;KCTD14;MT1H;FAM54A;EPHA1;FGF12;KLKB1
PRDM1 (human)	23/1468	0.0225389	0.146861	-1.1432	2.19297	MLKL;SP110;GABRA5;C13ORF38;GLDC;AK5;TRHDE;ACTG2;DPP4;MGAT4C;C6ORF132;RNF125;VEPH1;ZSCAN10;KIT;PLP1;TAF4B;NRIP3;KCTD14;CD36;CHST4;PRKG1;ARHGEF5
GLI2 (human)	23/1465	0.0220823	0.146861	-1.13146	2.17045	GABRB3;SLC22A3;KCND2;MOCOS;LRRC17;ITPR3;A2ML1;FBXL13;TC2N;TTC39C;ASS1;GABRG1;PPP2R2C;PSAT1;CTH;PPP4R4;SCNN1A;ZFP42;CD9;OTX2;FGFR4;SMPDL3B;VAT1L
NR5A1 (human)	22/1389	0.0228451	0.146861	-1.12464	2.15736	GABRQ;EIF4A2;CR2;HPGD;TNFAIP6;SP110;SLC43A1;FAM129A;SLC4A11;LAMC2;TNFRSF11B;NMI;AK5;PPM1E;GLB1L3;KIAA0040;FGD4;SOCS1;ORC1;TLCD1;KIAA1804;RNF133
MYOG (human)	22/1404	0.0253384	0.154151	-1.1207	2.09551	ZNF560;SYT1;NRK;SLC4A11;LAMC2;TACR1;ETS1;GLB1L3;SLC7A3;MGAT4C;CDCP1;CYP2B6;PSAT1;CYP2S1;VEPH1;SEMG1;SCNN1A;PLP1;HLA-DRA;FAM54A;SNTB1;VGLL3
TEAD2 (human)	23/1486	0.0254348	0.154151	-1.10354	2.06342	FOXB1;NECAB1;GLDC;SLC4A11;TACR1;NMI;FBXL13;TC2N;COCH;KIAA0040;PLA2G16;TUBB2B;MYC;SLITRK3;MYB;NRIP3;CD9;AP1S3;TLCD1;RAB17;KIF1A;STEAP2;MGC87042
NFKB1 (mouse)	44/3284	0.0254472	0.154151	-0.884565	1.65398	GRIA1;GABRB3;KCNG3;CRABP1;SLC43A1;FAM129A;ZDHHC22;SLC7A11;IFI30;TRHDE;FGF2;LRP8;ETS1;VSIG10;ACTG2;ARNTL2;GPR176;SOCS1;CAMKV;DSEL;SLITRK3;ENPP1;GPC4;VAT1L;CALN1;UNC13A;SYT1;TMEM132B;MOCOS;VASH2;NMI;FBXL13;PARP14;GABRG1;DNM3;AIM1;NR5A2;VSNL1;VEPH1;CNTN1;TRIM36;RAB17;FGF12;SNTB1
GATA1 (human)	37/2679	0.0266255	0.158246	-0.983277	1.81277	LUZP2;DSCC1;LAMC2;SLC7A11;CLU;PPM1E;FGF2;ETS1;LRP8;ACTG2;CYP2B6;DNMT3B;HESX1;CHAC2;CD36;PIM2;RNF133;MGC87042;CHST9;FOXB1;SP110;GABRA5;GABRA3;FHDC1;GABRG1;MGAT4C;DNM3;GAP43;NR5A2;PPP2R2C;CTAGE4;CYP2S1;VEPH1;SCNN1A;CHST4;FGF12;KLKB1
TFAP2A (mouse)	25/1663	0.027511	0.160481	-1.00886	1.84579	GRIA1;FRMPD4;LY75;ZDHHC22;IFI30;TRHDE;CUZD1;GLB1L3;MYC;DNMT3B;PRODH;CALN1;MFSD2A;CPT1A;MLKL;SP110;HTR1D;MAMDC2;PIPOX;ASS1;NR5A2;PPP2R2C;RAB17;TLCD1;VGLL3
NR3C1 (human)	24/1590	0.0292516	0.167532	-1.00105	1.78845	CR2;TMEM132B;ST8SIA3;CRABP1;HTR1D;IFI30;CUZD1;ACTG2;KIAA0040;AADACL3;CDCP1;PPP2R2C;DSEL;SCNN1A;DNMT3B;HLA-DRA;BEND4;SP140L;EPHA1;SLC27A2;STEAP2;KLKB1;ARHGEF5;CALN1
LTF (human)	21/1363	0.0332482	0.187021	-1.03643	1.73761	GABRB3;SLC22A3;SP110;GLDC;TMEM132B;GABRA3;GRPR;RGMB;THBS2;PARP12;KIAA0040;DPP4;HPDL;C6ORF132;PPP2R2C;WIF1;VEPH1;MT1H;CHAC1;ZNF860;VGLL3
MYC (mouse)	25/1699	0.0341611	0.188785	-0.967198	1.61246	PIWIL2;HPGD;SLC43A1;PRUNE2;FAM129A;ITPR3;CUZD1;ADAMTS16;FGD4;GPR176;CAMKV;CHAC1;PIPOX;IRAK3;RINT1;FAM101B;CCNA1;RNF125;VSNL1;CTH;NMU;POLR3G;TAF4B;STEAP1;CCL28
HOXA5 (human)	40/3000	0.0348086	0.188832	-1.15734	1.92917	GRIA1;PCSK1;NECAB1;IFITM1;TNFRSF11B;SAMHD1;PPM1E;TRHDE;CHRDL1;FGD4;GPR176;KIF1A;RNF133;CALN1;CPT1A;FZD5;DTX3L;KCND2;C13ORF38;SP110;TMEM132B;GABRA3;MAMDC2;CABLES1;A2ML1;TACR1;TEX15;FBXL13;SHISA9;SYT6;NELL2;FAM101B;NR5A2;PSAT1;CYP2S1;SNORD20;RAB39;STEAP1;FGF12;VGLL3
MIR210 (human)	1970-03-01	0.0353686	0.188832	-0.777995	1.29684	SOCS1;DPPA5;ZNF860
NR5A2 (human)	49/3815	0.0360882	0.189463	-0.798056	1.32762	CNTNAP3;PIWIL2;NRK;HIST1H1T;LY75;IFI30;CLU;FGF2;ETS1;DNMT3B;PIM2;MFSD2A;CHST9;ZNF483;DTX3L;SP110;TC2N;TUBB2B;RNF125;KIT;CHST4;EPHA1;ARHGEF5;GRIA1;SLC22A3;HPGD;LRRC17;FAM129A;ITPR3;SAMHD1;THBS2;LRP8;KIAA0040;FGD4;ZSCAN10;OTX2;MLKL;CKMT1A;TFPI2;PARP14;FBXL13;TTC39C;ASS1;SYT6;VEPH1;NFE2L3;CD9;SP140L;CCL28
MZF1_5-13 (human)	7/316	0.0414533	0.200955	-1.25299	2.01065	FAM101B;MIR222;C1ORF182;PPP4R4;VEPH1;DNMT3B;CD36
BCL6 (human)	21/1399	0.0418633	0.200955	-0.885433	1.42083	PIWIL2;NECAB1;DTX3L;KCND2;C13ORF38;SP110;GLDC;FBXL13;CLU;PARP12;NELL2;CTH;VEPH1;MYB;TAF4B;CHAC2;OTX2;KIAA1804;VAT1L;C3ORF14;MGC87042
TP53 (human)	38/2866	0.0421049	0.200955	-0.7812	1.25357	SLC22A3;FRMPD4;NRK;IRS4;FAM129A;HSD17B6;FGF2;ETS1;HERC5;ZSCAN10;BEND4;CD36;AP1S3;CHAC1;PRKG1;VAT1L;C3ORF14;FOXB1;SYT1;TMEM132B;TFPI2;KIAA1244;IRAK3;A2ML1;FBXL13;TC2N;INHBE;MGAT4C;FAM101B;CCNA1;GAP43;NR5A2;VEPH1;ZFP42;TRIM36;CD9;TLCD1;MDGA2
PPARG (human)	46/3580	0.041634	0.200955	-0.777791	1.2481	SLC22A3;KCNG3;SLC43A1;MPV17L;LRRC17;HIST1H1T;TNFRSF11B;SAMHD1;CLU;CHRDL1;VSIG10;LRRC2;SLC7A3;AADACL3;PDZD4;ATCAY;FUT9;KIF5A;DNMT3B;NRIP3;PIM2;AP1S3;CD36;GPC4;AP1M2;TIMP4;MGC87042;MLKL;MME;ST8SIA3;FBXL13;PARP12;SYT6;FAM101B;C6ORF132;RNF125;NR5A2;PSAT1;TAF4B;TRIM36;DPPA5;TLCD1;RAB39;FGFR4;INA;SNTB1
E2F1 (human)	53/4207	0.040155	0.200955	-0.7679	1.23223	CNTNAP3;EIF4A2;GABRB3;MEGF10;MT1M;IRS4;CLU;ETS1;MYB;ENPP1;NEFM;PRKG1;C3ORF14;KCND2;SP110;TACR1;RINT1;CCNA1;FAM101B;TUBB2B;TUBB2A;VSNL1;KIT;TLCD1;RAB39;DOCK2;STEAP2;SLC22A3;ITPR3;SAMHD1;TRHDE;ARNTL2;KIAA0040;PDZD4;ORC1;WIF1;C10ORF96;OTX2;GPC4;VAT1L;SLC38A5;ZNF860;FZD5;TMEM132B;MOCOS;SLC4A11;FBXL13;ASS1;PPP2R2C;CTH;POLR3G;MDGA2;FGFR4
NFYB (human)	1930-02-01	0.0393986	0.200955	0.544223	-0.8733	MME;CHEK2
MIB2 (human)	22/1490	0.0438686	0.203215	-0.832115	1.32597	GABRB3;MME;FRMPD4;MOCOS;PPM1E;CLU;CUZD1;CHRDL1;SYT6;DPP4;HERC5;NR5A2;TUBB2A;SCNN1A;CNTN1;NRIP3;BEND4;FAM54A;DPPA5;PRODH;STEAP2;VAT1L
CACYBP (mouse)	24/1656	0.0433146	0.203215	-0.807033	1.286	GRIA1;UNC13A;SYT1;CCDC109B;TACR3;SLC4A11;FGF2;ASS1;ARNTL2;SLC7A3;INHBE;GAP43;TUBB2B;NR5A2;PPP2R2C;PSAT1;FUT9;SCNN1A;NEFM;RAB17;CHST4;VAT1L;CALN1;MFSD2A
SAMD9L (human)	21/1415	0.0461784	0.210814	-0.8919	1.38849	GRIA1;PIWIL2;GABRB3;SP110;ST8SIA3;SLC43A1;ETS1;PARP12;COCH;DNM3;HPDL;RINT1;GPR176;CDCP1;PPP2R2C;MYC;DNMT3B;CHAC2;TAC1;RPRM;MFSD2A
SRY (human)	9/469	0.0479726	0.215877	-1.15759	1.77464	UGT8;FAM101B;KCNG3;MIR221;NRK;MAMDC2;TACR3;SNORD78;KIAA1244
PRDM1 (mouse)	5/196	0.049094	0.217811	-1.00482	1.53147	DNM3;DPPA4;VEPH1;MYC;VGLL3
Pax2 (mouse)	22/1516	0.0510576	0.223377	-0.973488	1.45915	PCSK1;ZYG11A;MLKL;LUZP2;CRABP1;SNORD1A;IRS4;LAMC2;TEX15;GABRG1;TUBB2A;ATCAY;SLCO4C1;SCGB3A2;NFE2L3;CHST4;HIST1H1A;CCL28;INA;STEAP2;ARHGEF5;RPRM
MAPK14 (human)	18/1190	0.0536206	0.225207	-0.839038	1.25079	KCNG3;TMEM132B;MT1M;KIAA1244;ZDHHC22;PPM1E;ALDH1L2;FGD4;RINT1;C10ORF96;CD36;FAM54A;SRY;SLC27A2;FGF12;C3ORF14;ARHGEF5;VGLL3
SOX10 (human)	4/139	0.053116	0.225207	-0.8308	1.2385	UGT8;CR2;SLCO4C1;CHAC1
TEAD4 (human)	20/1354	0.0528926	0.225207	-0.80179	1.19526	KCND2;LRRC17;COBL;SLC4A11;ITPR3;KIAA1244;FBXL13;CLU;KIAA0040;NELL2;HERC5;GNG4;PPP4R4;FGF19;ENPP1;TLCD1;KIF1A;DPPA5;FGFR4;KIAA1804
THRA (human)	6/271	0.0568929	0.22976	-0.874595	1.28628	MGAT4C;CHST9;GYLTL1B;TNFAIP6;VSNL1;BEND4
PLAU (human)	20/1362	0.0554784	0.22976	-0.823388	1.21097	PCSK1;C13ORF38;BCL11A;HTR1D;TACR1;GRPR;IFI30;TUBB2B;TUBB2A;GNG4;FGF19;TAF4B;KIF1A;RAB17;RAB39;FGFR4;TAC1;C3ORF14;PRKG1;TRIM22
CBEPA (human)	20/1366	0.0568043	0.22976	-0.776959	1.14269	GABRB3;FOXB1;HPGD;FRMPD4;MAMDC2;ITPR3;SHISA9;GRPR;ETS1;CHRDL1;LRP8;VSIG10;AIM1;VEPH1;SCNN1A;KIT;FAM54A;MDGA2;PRKG1;ARHGEF5
Arnt::Ahr (mouse)	5/207	0.0590434	0.233465	-0.900219	1.30957	FOXB1;CBR1;ZSCAN10;IFI30;CCL28
HIF1A (mouse)	17/1124	0.0596331	0.233465	-0.782142	1.1378	CNTNAP3;TACR3;SLC4A11;COBL;AK5;THBS2;PARP14;ATCAY;FUT9;CTH;CNTN1;NRIP3;FAM54A;AP1S3;STEAP1;CHST4;SLC27A2
GATA3 (human)	33/2505	0.0602877	0.233465	-0.678099	0.986448	NECAB1;MPV17L;FAM129A;LAMC2;TNFRSF11B;SLC7A11;GRPR;THBS2;ETS1;CHRDL1;HERC5;ADAMTS16;CYP2B6;WIF1;CHAC2;CD36;SRY;PCK2;MACC1;TFPI2;VASH2;TACR3;FBXL13;ASS1;MGAT4C;FAM101B;PLA2G16;PPP2R2C;DPPA3;CLC;TLCD1;CCL28;FGF12
RELA (human)	36/2775	0.0608769	0.233465	-0.598556	0.870734	EIF4A2;PCSK1;SLC22A3;KCNG3;MEGF10;AK5;HSD17B6;CLU;DPP4;MYB;DNMT3B;SRY;AP1S3;HIST1H1A;C3ORF14;MGC87042;FOXB1;FZD5;SYT1;GABRA5;SP110;BCL11A;CKMT1A;EPHX3;SLC4A11;FBXL13;ASS1;CCNA1;FAM101B;AIM1;RNF125;NR5A2;VSNL1;MT1H;TLCD1;SNTB1
TLX1::NFIC (human)	1939-02-01	0.0615161	0.233465	0.393677	-0.572692	FAM101B;C6ORF132
SND1 (human)	21/1473	0.0645308	0.239143	-0.640844	0.91685	CHST9;GABRA5;C13ORF38;GABRA3;ETS1;ASS1;SYT6;DPP4;MGAT4C;NELL2;DNM3;C6ORF132;CTH;MYB;SPP1;DNMT3B;BEND4;TLCD1;CHST4;PRKG1;ZNF860
HNF1B (human)	1990-03-01	0.0641079	0.239143	-0.419343	0.59995	GAP43;PPP4R4;SPP1
MYB (human)	20/1409	0.0724906	0.265518	-0.671896	0.890983	EIF4A2;CHST9;CBR1;CCDC109B;CABLES1;IFI30;TTC39C;GRPR;ETS1;CHRDL1;GABRG1;MGAT4C;UGT8;VEPH1;SEMG1;SCGB3A2;ENPP1;CD36;MDGA2;PRKG1
MAX (human)	26/1934	0.0744321	0.269275	-0.644108	0.845084	GLDC;THBS2;HERC5;AADACL3;FAM124A;CAMKV;CD36;SLC38A5;CPT1A;CR2;GABRA5;C13ORF38;BCL11A;MOCOS;CABLES1;SLC4A11;FBXL13;PARP12;FAM101B;TUBB2B;ZFP42;TAF4B;TLCD1;FGFR4;EPHA1;SNTB1
ZFHX3 (human)	21/1504	0.0761872	0.269275	-0.639519	0.839064	CNTNAP3;ZNF483;SP110;GABRA5;VASH2;SAMHD1;TC2N;ETS1;PARP12;GABRG1;MGAT4C;ATCAY;RNF125;ORC1;ZFP42;DPPA5;CHAC1;RAB39;PRODH;SLC27A2;AP1M2
CEBPB (human)	20/1420	0.0769356	0.269275	-0.612781	0.803983	EIF4A2;MLKL;TNFAIP6;GLDC;NRK;GABRA3;PIPOX;IRAK3;IFI30;GRPR;ETS1;DPP4;PDZD4;MYC;ENPP1;CD36;RAB39;SP140L;STEAP2;ZNF860
MYOG (mouse)	23/1675	0.0754727	0.269275	-0.569742	0.747514	EIF4A2;IFITM1;MME;DTX3L;HIST1H1T;TACR3;IRAK3;HSD17B6;LRRC2;ADAMTS16;MGAT4C;PLA2G16;GPR176;AIM1;NR5A2;DRAM1;SOCS1;GYLTL1B;SCNN1A;NFE2L3;RAB17;ARHGEF5;MFSD2A
ELK1 (human)	21/1511	0.0790051	0.270507	-0.588127	0.768951	GABRB3;SLC22A3;MME;SYT1;TNFAIP6;GABRA5;C13ORF38;PIPOX;SLC4A11;TACR1;SAMHD1;VSIG10;SLC7A3;ADAMTS16;DPP4;HERC5;UGT8;FAM101B;VEPH1;SCGB3A2;C3ORF14
THRB (human)	27/2034	0.0785813	0.270507	-0.553446	0.723607	GABRB3;PCSK1;KCNG3;CRABP1;PRUNE2;ITPR3;ALDH1L2;ARNTL2;ADAMTS16;HERC5;DSEL;CHEK2;DNMT3B;NEFM;OTX2;AP1S3;GPC4;PRKG1;MFSD2A;EPHX3;MGAT4C;CYP2S1;NMU;CNTN1;FGFR4;EPHA1;VGLL3
HNF4A (human)	28/2127	0.0801381	0.271326	-0.507719	0.662285	GUCY2C;PCSK1;LRRC17;FGF2;ACTG2;DRAM1;GYLTL1B;GNG4;SLITRK3;BEND4;ENPP1;CHAC2;C3ORF14;TIMP4;CHST9;CR2;DTX3L;KCND2;SP110;GABRA3;CABLES1;TACR1;FBXL13;TC2N;PPP2R2C;VEPH1;ZFP42;TAF4B
PBX1 (human)	1946-02-01	0.0809672	0.271326	0.39417	-0.514168	FAM101B;GPC4
CRTC3 (human)	15/1008	0.0818453	0.271382	-0.627929	0.818963	PIWIL2;MACC1;PRUNE2;TTC39C;ETS1;UGT8;PPP4R4;SCGB3A2;RAB17;SRY;FAM54A;MDGA2;ARHGEF5;MFSD2A;VGLL3
XBP1 (human)	10/605	0.0840375	0.275748	-0.700048	0.901849	GABRB3;ZNF560;CTH;TACR3;HLA-DRA;CD9;TAC1;FHDC1;PRKG1;TRIM22
NFE2 (human)	34/2681	0.0855512	0.277821	-0.396513	0.507845	SLC22A3;NRK;LRRC17;AK5;CLU;CUZD1;ETS1;COCH;SLC7A3;CD36;KIF1A;GPC4;PRODH;PRKG1;MFSD2A;CBR1;SP110;COBL;NMI;FBXL13;SHISA9;TC2N;TUBB2B;CDCP1;RNF125;PPP2R2C;VEPH1;KIT;ZFP42;PLP1;TLCD1;RAB17;EPHA1;SLC27A2
RORB (mouse)	15/1020	0.0881647	0.279421	-0.515558	0.657355	ZYG11A;MEGF10;TNFAIP6;FZD5;BCL11A;MOCOS;HIST1H1T;HSD17B6;TRHDE;PARP12;AADACL3;HPDL;ZSCAN10;CD36;SMPDL3B
NR2F1 (mouse)	15/1021	0.088705	0.279421	-0.514526	0.656039	ZYG11A;MEGF10;TNFAIP6;FZD5;BCL11A;MOCOS;HIST1H1T;HSD17B6;TRHDE;PARP12;AADACL3;HPDL;ZSCAN10;CD36;SMPDL3B
IRF2 (mouse)	23/1706	0.0876875	0.279421	-0.460053	0.586584	EIF4A2;CNTNAP3;MACC1;TMEM132B;GABRA3;PIPOX;SLC7A11;ALDH1L2;GLB1L3;MGAT4C;RINT1;PLA2G16;IL6;MYC;VEPH1;MYB;KCTD14;CHAC2;MDGA2;SMPDL3B;FGF12;PRKG1;RNF133
Pax6 (human)	4/169	0.0918745	0.28652	-0.521606	0.65198	FAM101B;C6ORF132;CD36;SMPDL3B
HOXD9 (human)	21/1543	0.092778	0.28652	-0.438926	0.548633	GABRB3;SYT1;GLDC;MPV17L;VASH2;LAMC2;A2ML1;COCH;GLB1L3;MGAT4C;NELL2;DNM3;CCNA1;NR5A2;DPPA4;VEPH1;CNTN1;NEFM;CD36;KIF1A;RPRM
ESR2 (mouse)	1951-02-01	0.0958572	0.293155	0.913916	-1.12142	NELL2;LY75
JUND (human)	19/1380	0.0979071	0.296545	-0.451669	0.549028	CHST9;PCSK1;SYT1;TNFAIP6;MEGF10;DSCC1;SLC7A11;CLU;ETS1;GABRG1;MGAT4C;NELL2;DPPA4;DPPA3;C10ORF96;MYB;BEND4;RNF133;TRIM22
RUNX1 (mouse)	1953-02-01	0.102016	0.30056	0.77836	-0.935671	SLC4A11;CCL28
Pax5 (mouse)	2016-10-01	0.103049	0.30056	9.18171	-11.0374	CCL28
Pou5f1 (mouse)	2016-10-01	0.103049	0.30056	9.31857	-11.2019	CCL28
Pax4 (mouse)	2016-10-01	0.103049	0.30056	9.39985	-11.2996	CCL28
ELF3 (human)	20/1488	0.108476	0.313485	-0.339966	0.394362	ZNF560;SP110;TFPI2;LY75;TACR3;ITPR3;FBXL13;ACTG2;SLC7A3;AADACL3;AIM1;CAMKV;NMU;SEMG1;SCNN1A;TRIM36;FGFR4;SP140L;EPHA1;VAT1L
ZNF281 (human)	14/986	0.118831	0.315654	-0.360661	0.415881	GABRB3;CNTNAP3;BCL11A;THBS2;PDZD4;TUBB2B;GNG4;MYB;ENPP1;NEFM;RAB39;KIAA1804;PRKG1;CALN1
IRF2 (human)	19/1412	0.11469	0.315654	-0.322866	0.3723	GRIA1;ZNF560;MLKL;PRUNE2;SAMHD1;PPM1E;DNM3;FAM101B;GAP43;ORC1;VEPH1;ZSCAN10;TAF4B;CD36;SMPDL3B;SLC27A2;TRIM22;RNF133;MFSD2A
CBEPA (mouse)	23/1764	0.113919	0.315654	-0.296696	0.342123	GRIA1;CNTNAP3;PCSK1;CR2;LUZP2;GABRA5;PRUNE2;ST8SIA3;HSD17B6;SLC7A11;TEX15;ARNTL2;DNM3;RNF125;DPPA4;VSNL1;DPPA3;VEPH1;ZFP42;SPP1;CNTN1;CD36;RNF133
GFI1 (human)	19/1427	0.123132	0.315654	-0.25586	0.295035	CNTNAP3;MPV17L;HTR1D;A2ML1;SAMHD1;PPM1E;ALDH1L2;LRRC2;RNF125;NR5A2;DPPA3;MYC;KCTD14;RAB39;PRODH;FGFR4;SMPDL3B;AP1M2;VGLL3
SPI1 (mouse)	22/1680	0.116395	0.315654	-0.240469	0.277287	CBR1;MLKL;TMEM132B;HTR1D;GABRA3;VASH2;EPHX3;PDZD4;FGD4;GAP43;PPP2R2C;FUT9;ZFP42;SCNN1A;NMU;DNMT3B;SPP1;NFE2L3;KIF1A;RAB39;MDGA2;PRKG1
SNAI1 (human)	19/1428	0.123708	0.315654	-0.236503	0.272714	ZNF483;MOCOS;COBL;FBXL13;CUZD1;LRP8;ACTG2;INHBE;AADACL3;PPP2R2C;VEPH1;ZSCAN10;SCNN1A;NRIP3;AP1S3;DPPA5;SMPDL3B;SLC27A2;KLKB1
TCF3 (human)	19/1428	0.123708	0.315654	-0.223526	0.25775	ZNF483;MOCOS;COBL;FBXL13;CUZD1;LRP8;ACTG2;INHBE;AADACL3;PPP2R2C;VEPH1;ZSCAN10;SCNN1A;NRIP3;AP1S3;DPPA5;SMPDL3B;SLC27A2;KLKB1
SNAI2 (human)	19/1428	0.123708	0.315654	-0.210331	0.242535	ZNF483;MOCOS;COBL;FBXL13;CUZD1;LRP8;ACTG2;INHBE;AADACL3;PPP2R2C;VEPH1;ZSCAN10;SCNN1A;NRIP3;AP1S3;DPPA5;SMPDL3B;SLC27A2;KLKB1
ETS2 (human)	18/1341	0.124257	0.315654	-0.126878	0.146304	PCSK1;CBR1;MME;SYT1;IRAK3;ZDHHC22;PARP14;CLU;CCNA1;ACOXL;VEPH1;KIF5A;ZFP42;HESX1;BEND4;GPC4;C3ORF14;RPRM
Myf (human)	1958-02-01	0.117863	0.315654	0.664032	-0.765701	FAM101B;CTAGE4
PPARG::RXRA (mouse)	2016-12-01	0.120615	0.315654	7.67219	-8.84687	CCL28
Spz1 (mouse)	2016-12-01	0.120615	0.315654	8.01637	-9.24375	CCL28
GABPA (mouse)	2016-12-01	0.120615	0.315654	8.14689	-9.39426	CCL28
Evi1 (mouse)	2016-11-01	0.111875	0.315654	8.35472	-9.63391	CCL28
T (mouse)	2016-11-01	0.111875	0.315654	8.3891	-9.67355	CCL28
Sox17 (mouse)	8/500	0.130091	0.32322	-0.329852	0.372542	GAP43;ZFP42;SCGB3A2;KCTD14;GCNT4;SRY;CCL28;ACTG2
FOXD1 (human)	4/192	0.128527	0.32322	-0.235513	0.265993	FAM101B;GPR176;MAMDC2;TACR1
USF1 (human)	19/1441	0.13134	0.32322	-0.148812	0.168072	CPT1A;CR2;GABRA5;C13ORF38;GABRA3;MOCOS;CABLES1;THBS2;HERC5;AADACL3;FAM101B;CAMKV;ZFP42;TAF4B;CD36;FGFR4;EPHA1;SLC38A5;SNTB1
EGR1 (mouse)	21/1617	0.130331	0.32322	-0.0837615	0.0946021	CBR1;KCNG3;ZYG11A;UNC13A;KCND2;BCL11A;SLC4A11;COBL;SHISA9;FHDC1;RGMB;PPM1E;TUBB2B;MYC;DNMT3B;ENPP1;NEFM;GPC4;TLCD1;MDGA2;CCL28
E2F4 (human)	5/270	0.135919	0.330815	-0.235108	0.260076	TUBB2B;STEAP1;STEAP2;C3ORF14;MGC87042
SMAD4 (human)	20/1542	0.138581	0.330815	-0.102093	0.112935	GABRB3;NRK;DSCC1;FAM129A;SLC4A11;IFI30;TTC39C;GRPR;CLU;GABRG1;PDZD4;PLA2G16;MYC;SCNN1A;PLP1;TAC1;SP140L;ARHGEF5;TIMP4;ZNF860
ELK4 (human)	19/1453	0.138627	0.330815	-0.0866284	0.095828	GABRB3;HPGD;NRK;MT1M;GRPR;TRHDE;ETS1;GLB1L3;FAM101B;PPP2R2C;WIF1;CYP2S1;NFE2L3;CD9;ENPP1;CHST4;EPHA1;STEAP1;MGC87042
CEBPE (human)	3/127	0.136813	0.330815	0.161113	-0.178223	DRAM1;VSNL1;FZD5
Esrrb (mouse)	1965-02-01	0.140973	0.333884	1.1766	-1.29068	CCL28;PCK2
NFAT2 (human)	18/1376	0.14619	0.341954	-0.0630167	0.0676218	FAM129A;ETS1;LRP8;NELL2;UGT8;GAP43;GPR176;VSNL1;VEPH1;SEMG1;MYB;CHAC2;NEFM;CD36;FAM54A;CHST4;SP140L;SLC27A2
RBPJ (mouse)	22/1735	0.146552	0.341954	0.0258558	-0.0277453	GUCY2C;CBR1;SYT1;KCND2;MAMDC2;HIST1H1T;FHDC1;LRP8;PDZD4;FGD4;CDCP1;ATCAY;CTH;CHEK2;MYC;KIT;SLITRK3;SCGB3A2;CD9;POLR3G;CD36;CHAC1
FOXO3 (human)	3/132	0.148195	0.343247	0.18146	-0.194037	FAM101B;GPR176;MAMDC2
FOXF1 (mouse)	4/206	0.153384	0.352671	0.0255081	-0.026585	CPT1A;ZYG11A;SYT1;TLCD1
Lhx3 (mouse)	2016-01-01	0.154725	0.353176	7.6042	-7.91437	CCL28
ARNT (human)	17/1303	0.157041	0.354934	-0.0462664	0.0479238	BCL11A;TACR1;AK5;CHRDL1;ETS1;TRHDE;ADAMTS16;CCNA1;TUBB2B;FAM124A;SOCS1;CYP2S1;MYC;DPPA5;SNTB1;ZNF860;CALN1
POU2F1 (human)	18/1399	0.16172	0.354934	0.0558584	-0.0578594	GABRB3;ZNF483;TNFAIP6;DTX3L;SP110;GABRA5;LUZP2;ITPR3;A2ML1;HSD17B6;GRPR;IL6;FUT9;ENPP1;OTX2;PIM2;DOCK2;EPHA1
POU1F1 (mouse)	22/1754	0.157932	0.354934	0.0813814	-0.0842967	CHST9;KCNG3;BCL11A;HTR1D;PRUNE2;FBXL13;GLB1L3;ASS1;DPP4;FAM101B;GPR176;DRAM1;TUBB2A;ATCAY;PPP2R2C;ZSCAN10;TRIM36;BEND4;AP1S3;RAB39;PRODH;VAT1L
TFAP2C (human)	19/1485	0.159176	0.354934	0.096131	-0.0995747	FOXB1;CPT1A;CR2;MLKL;C13ORF38;DSCC1;VASH2;PIPOX;COBL;ETS1;LRP8;GLB1L3;KIAA0040;CDCP1;MYC;DNMT3B;NRIP3;EPHA1;STEAP2
E2F1 (mouse)	36/3056	0.162553	0.354934	0.232824	-0.241165	GABRB3;RASGRF2;DSCC1;CRABP1;PRUNE2;ZDHHC22;GLB1L3;ADAMTS16;FGD4;GPR176;GYLTL1B;PPP4R4;MYC;CHEK2;ZSCAN10;SPP1;DNMT3B;ENPP1;OTX2;HIST1H1A;FOXB1;UNC13A;KCND2;GABRA5;MAMDC2;EPHX3;SLC4A11;TC2N;ASS1;RINT1;CNTN1;POLR3G;TAF4B;TLCD1;MDGA2;ARHGEF5
PITX2 (human)	41/3528	0.163382	0.354934	0.302828	-0.313676	EIF4A2;PIWIL2;TNFAIP6;IRS4;FAM129A;SAMHD1;PPM1E;ETS1;VSIG10;SLC7A3;FGD4;ATCAY;DRAM1;GNG4;MYC;ZSCAN10;MYB;OTX2;CD36;KIF1A;AP1M2;CR2;C13ORF38;EPHX3;A2ML1;TTC39C;SHISA9;PARP12;RINT1;C6ORF132;RNF125;DPPA4;DPPA3;TRIM36;HLA-DRA;KCTD14;DPPA5;RAB39;SMPDL3B;STEAP1;SNTB1
Tcfcp2l1 (mouse)	2017-01-01	0.163044	0.354934	7.5371	-7.8071	CCL28
WT1 (human)	32/2689	0.165913	0.357962	0.257187	-0.264215	GABRB3;SLC43A1;TRHDE;CLU;LRP8;VSIG10;ADAMTS16;AADACL3;PDZD4;GYLTL1B;GNG4;MYB;DNMT3B;NRIP3;KIF1A;AP1M2;CHST9;FZD5;SP110;BCL11A;MOCOS;COBL;TUBB2A;PPP2R2C;FGF19;KCTD14;DPPA5;TLCD1;RAB39;MDGA2;FGFR4;SMPDL3B
Tal1::Gata1 (mouse)	2018-01-01	0.171282	0.367033	7.33007	-7.34696	CCL28
ZNF354C (human)	18/1430	0.184004	0.391631	-0.0604071	0.0566277	GABRB3;SERPINB4;ZYG11A;SYT1;FAM129A;PPM1E;LRP8;ASS1;VSIG10;INHBE;MGAT4C;FAM101B;ACOXL;CAMKV;VEPH1;SPP1;SCGB3A2;OTX2
Mycn (mouse)	2020-01-01	0.187516	0.396426	7.19047	-6.65309	CCL28
NR4A2 (human)	1979-02-01	0.18956	0.398076	1.03354	-0.952009	GABRQ;FAM101B
Myb (mouse)	23/1902	0.194061	0.402167	0.221794	-0.20203	GUCY2C;GABRB3;KCNG3;CPT1A;SYT1;CRABP1;GRPR;PARP14;FGF2;DNM3;CCNA1;TUBB2B;GNG4;SLITRK3;TRIM36;NEFM;CD36;GPC4;CHAC1;SMPDL3B;PRODH;CCL28;CALN1
NFKB1 (human)	40/3497	0.193736	0.402167	0.362625	-0.330311	GRIA1;GABRB3;SLC22A3;MEGF10;SLC43A1;CUZD1;ETS1;DPP4;PDZD4;ACOXL;CYP2B6;GNG4;CHEK2;KIF5A;MYB;SLITRK3;SPP1;DNMT3B;NRIP3;CD36;SRY;AP1S3;KIF1A;C3ORF14;CHST9;SYT1;GABRA5;SP110;SLC4A11;IRAK3;FBXL13;ASS1;NELL2;FAM101B;IL6;RNF125;ZFP42;DPPA5;FGFR4;STEAP2
Pdx1 (mouse)	12/907	0.196664	0.402595	0.023941	-0.021782	GRIA1;PIWIL2;SNORD45C;GABRA5;ZFP42;MOCOS;CRABP1;TACR3;CABLES1;GRPR;CCL28;PARP12
MIR138 (human)	17/1356	0.196824	0.402595	0.173411	-0.157773	GABRQ;GRIA1;SYT1;CRABP1;FAM129A;HSD17B6;CHRDL1;PDZD4;TUBB2B;CYP2B6;PPP2R2C;CAMKV;POLR3G;DOCK2;EPHA1;INA;CALN1
SREBF2 (human)	17/1361	0.200813	0.406867	0.216158	-0.194385	GABRB3;IFITM1;CKMT1A;MT1M;EPHX3;LRP8;NELL2;TUBB2B;TUBB2A;DRAM1;PPP2R2C;FUT9;ZFP42;ZSCAN10;SCNN1A;CD9;KIAA1804
KLF13 (human)	18/1453	0.201496	0.406867	0.241865	-0.217502	GABRB3;PCSK1;MEGF10;MAMDC2;COBL;ITPR3;TC2N;CUZD1;ETS1;GABRG1;RNF125;PPP2R2C;VEPH1;MYC;KIT;CD9;OTX2;PRKG1
EBF1 (mouse)	2022-01-01	0.203433	0.408162	6.74055	-6.04015	CCL28
RUNX2 (human)	18/1458	0.205402	0.409504	0.245952	-0.219588	GABRB3;C9ORF135;SP110;CKMT1A;TC2N;CLU;PARP12;INHBE;DRAM1;VEPH1;SPP1;DNMT3B;TAF4B;ENPP1;RAB39;TRIM22;MFSD2A;CALN1
RELA (mouse)	20/1656	0.216263	0.428445	0.334756	-0.283736	GUCY2C;PCSK1;BCL11A;TMEM132B;ST8SIA3;CABLES1;TC2N;ETS1;DNM3;TUBB2A;ATCAY;GNG4;PPP4R4;MYB;CD9;NRIP3;GCNT4;PIM2;FGF12;HIST1H1A
VDR (human)	1988-02-01	0.221847	0.436761	1.18775	-0.9839	CYP2B6;NALCN
Nkx3-2 (mouse)	14/1122	0.23055	0.444624	0.214992	-0.174257	IFITM1;MLKL;KCND2;GABRA5;RASGRF2;TMEM132B;IRAK3;SLC7A11;PARP14;CYP2S1;MYB;NFE2L3;CD36;CCL28
ATF4 (human)	17/1398	0.231487	0.444624	0.346325	-0.280705	EIF4A2;GABRB3;PCSK1;C13ORF38;HTR1D;IRAK3;TUBB2A;VEPH1;FGF19;NMU;TAF4B;BEND4;KIF1A;RAB39;TAC1;C3ORF14;TRIM22
IKZF1 (mouse)	20/1674	0.230125	0.444624	0.379538	-0.307625	IFITM1;TNFAIP6;BCL11A;LRRC17;FAM129A;TNFRSF11B;TACR1;ZDHHC22;SAMHD1;FGF2;ACTG2;FAM101B;RNF125;GYLTL1B;ZFP42;PLP1;CNTN1;CHAC1;RAB17;DOCK2
SND1 (mouse)	1990-02-01	0.229086	0.444624	1.18895	-0.963677	MOCOS;TRHDE
NR3C1 (mouse)	21/1775	0.236221	0.450967	0.363164	-0.28921	CR2;DTX3L;VASH2;TC2N;PARP14;TRHDE;ACTG2;WIF1;SCGB3A2;SPP1;TRIM36;KCTD14;CD36;RAB17;RAB39;SMPDL3B;CHST4;HIST1H1A;VAT1L;SNTB1;RPRM
CBFB (human)	10/774	0.245336	0.465547	0.253421	-0.193751	CCNA1;KCNG3;C9ORF135;GYLTL1B;CAMKV;DPPA4;MYC;CD36;SRY;EPHA1
ESR1 (human)	18/1513	0.250625	0.472735	0.376319	-0.281945	ZNF560;C13ORF38;HTR1D;FGF2;PARP12;VSIG10;GNA14;FAM101B;HLA-DRA;CD36;TLCD1;RAB17;PRODH;EPHA1;VAT1L;AP1M2;TIMP4;MFSD2A
ARID3A (mouse)	22/1893	0.254964	0.478058	0.31359	-0.231437	IFITM1;MME;SP110;TMEM132B;MAMDC2;LRRC17;CABLES1;TNFRSF11B;ITPR3;SHISA9;FHDC1;GLB1L3;RINT1;PLA2G16;GNG4;PSAT1;ZFP42;KIT;SCGB3A2;FGF12;CCL28;STEAP2
NKX3-1 (human)	4/264	0.271088	0.499308	0.300629	-0.208796	FAM101B;CCDC109B;FGF12;ACTG2
REL (human)	5/353	0.277551	0.499308	0.32257	-0.224035	FAM101B;AIM1;FAM124A;DNMT3B;LAMC2
ATF1 (human)	4/264	0.271088	0.499308	0.3546	-0.246281	TUBB2B;C6ORF132;TTC39C;TAC1
SOX10 (mouse)	6/451	0.29509	0.499308	0.405601	-0.281703	GAP43;GLDC;IRS4;NRIP3;INA;LRRC2
KLF5 (human)	17/1445	0.27312	0.499308	0.429549	-0.298335	CNTNAP3;CPT1A;MME;EPHX3;COBL;ITPR3;FBXL13;TC2N;LRP8;TUBB2A;MYB;ENPP1;TLCD1;KIF1A;RAB39;SMPDL3B;KIAA1804
E2F6 (human)	16/1358	0.279323	0.499308	0.480797	-0.333929	GABRB3;CPT1A;BCL11A;NRK;SLC43A1;SLC4A11;COBL;AK5;FBXL13;GABRG1;CCNA1;PDZD4;TUBB2B;MYC;NRIP3;NEFM
TCFAP2A (human)	16/1367	0.287936	0.499308	0.490473	-0.340649	GABRB3;FZD5;BCL11A;COBL;SLC4A11;ITPR3;KIAA1244;ADAMTS16;PDZD4;CCNA1;GNG4;TLCD1;KIF1A;MDGA2;FGF12;ZNF860
ELK1 (mouse)	20/1727	0.273091	0.499308	0.490996	-0.341012	GUCY2C;SP110;DSCC1;HTR1D;VASH2;NMI;FBXL13;SAMHD1;RINT1;NR5A2;GYLTL1B;ORC1;PPP4R4;NRIP3;NEFM;RAB39;SMPDL3B;FGFR4;PRODH;ATOH1
POU2F1 (mouse)	20/1735	0.279829	0.499308	0.503697	-0.349833	CHST9;UNC13A;TNFAIP6;RASGRF2;SLC4A11;ITPR3;SLC7A11;NMI;CUZD1;GABRG1;MGAT4C;ACOXL;AIM1;DPPA3;SPP1;BEND4;CHAC2;OTX2;PIM2;SLC38A5
REPIN1 (human)	17/1466	0.292552	0.499308	0.506041	-0.351462	FOXB1;KCND2;PRUNE2;PARP14;FBXL13;FGF2;LRP8;VSIG10;GLB1L3;SYT6;PSAT1;ZFP42;AP1S3;KIF1A;RAB39;PRKG1;SNTB1
IKZF1 (human)	16/1373	0.293727	0.499308	0.518648	-0.360218	GABRB3;SP110;BCL11A;HTR1D;SAMHD1;TC2N;THBS2;PARP12;VSIG10;C6ORF132;RNF125;DRAM1;PPP2R2C;GNG4;DNMT3B;SMPDL3B
SOX9 (human)	2/105	0.283663	0.499308	1.1365	-0.789336	FAM101B;SNORD78
REST (human)	1935-01-01	0.299585	0.499308	5.39928	-3.74997	FAM101B
RXR::RAR_DR5 (human)	1935-01-01	0.299585	0.499308	5.47812	-3.80472	FAM101B
RREB1 (human)	1935-01-01	0.299585	0.499308	5.54536	-3.85143	FAM101B
NR1H2::RXRA (human)	1935-01-01	0.299585	0.499308	5.58637	-3.87991	FAM101B
INSM1 (human)	1935-01-01	0.299585	0.499308	5.64388	-3.91986	FAM101B
PLAG1 (human)	1935-01-01	0.299585	0.499308	5.69525	-3.95553	FAM101B
RXRA::VDR (human)	1935-01-01	0.299585	0.499308	5.74857	-3.99256	FAM101B
CTCF (human)	1935-01-01	0.299585	0.499308	5.76093	-4.00114	FAM101B
NHLH1 (human)	1935-01-01	0.299585	0.499308	5.80904	-4.03456	FAM101B
HNF4A (mouse)	6/461	0.31217	0.507601	0.534845	-0.362657	GRIA1;NR5A2;LAMC2;NMI;DOCK2;KLKB1
MYC (human)	15/1302	0.317063	0.507601	0.720725	-0.488695	CBR1;CR2;CPT1A;C13ORF38;MOCOS;CABLES1;THBS2;ASS1;CAMKV;CTAGE4;ZFP42;RAB17;FGFR4;SLC38A5;CALN1
MYOD1 (mouse)	19/1672	0.307611	0.507601	0.721933	-0.489514	CBR1;SLC22A3;FOXB1;FZD5;ZDHHC22;AK5;TEX15;SYT6;PDZD4;PLA2G16;AIM1;GYLTL1B;DPPA3;WIF1;SLITRK3;CD9;KCTD14;FAM54A;RAB39
ETV4 (mouse)	20/1773	0.312611	0.507601	0.736769	-0.499574	EIF4A2;GABRB3;LUZP2;MACC1;CCDC109B;FAM129A;IRAK3;DNM3;GAP43;CHEK2;KIF5A;SCGB3A2;DNMT3B;NFE2L3;PLP1;TRIM36;KCTD14;GCNT4;CHAC2;CD36
UBTF (human)	17/1493	0.318167	0.507601	0.757829	-0.513854	SYT1;TNFAIP6;VASH2;SLC4A11;CLU;GLB1L3;GABRG1;AADACL3;CCNA1;PPP2R2C;SCNN1A;ZFP42;NEFM;CD36;CHAC1;GPC4;CALN1
TFAP2A (human)	39/3613	0.315519	0.507601	0.772135	-0.523554	GABRB3;SLC22A3;GLDC;LY75;IFI30;CLU;CUZD1;LRP8;ACTG2;KIAA0040;PDZD4;ACOXL;WIF1;PPP4R4;SLITRK3;DNMT3B;NRIP3;AP1S3;KIF1A;PRODH;PCK2;FZD5;GABRA5;BCL11A;SLC4A11;FBXL13;SYT6;FAM101B;TUBB2B;PSAT1;FGF19;KIT;PLP1;POLR3G;KCTD14;MT1H;TLCD1;MDGA2;FGF12
Nobox (mouse)	3/201	0.325114	0.507601	0.885397	-0.600352	GABRQ;CCL28;GABRG1
CREB1 (human)	30/2749	0.322896	0.507601	0.91214	-0.618486	GUCY2C;PCSK1;SLC43A1;ITPR3;UGT8;C10ORF96;ZSCAN10;PIM2;KIF1A;TAC1;AP1M2;C3ORF14;PCK2;CALN1;CBR1;SP110;TMEM132B;CKMT1A;HTR1D;CABLES1;FBXL13;TC2N;TTC39C;RINT1;IL6;C6ORF132;VEPH1;TLCD1;RAB17;RAB39
NFATC3 (human)	2/116	0.323521	0.507601	1.4775	-1.00183	KCND2;LRRC17
NFATC2 (human)	2/117	0.32712	0.507601	1.53681	-1.04205	BCL11A;KIAA1244
IRF1 (human)	1939-01-01	0.326775	0.507601	5.24159	-3.55411	FAM101B
EWSR1-FLI1 (human)	1939-01-01	0.326775	0.507601	5.29648	-3.59133	FAM101B
MIZF (human)	1937-01-01	0.313314	0.507601	5.37796	-3.64658	FAM101B
MYC::MAX (human)	1937-01-01	0.313314	0.507601	5.43693	-3.68657	FAM101B
Sox2 (mouse)	20/1797	0.333893	0.513055	0.840377	-0.560845	EIF4A2;NECAB1;CR2;NRK;RASGRF2;SLC7A11;TEX15;RGMB;TTC39C;GLB1L3;CCNA1;ACOXL;GPR176;FUT9;KIT;SPP1;CD36;EPHA1;CCL28;KLKB1
CBX5 (human)	1940-01-01	0.333406	0.513055	5.39877	-3.60299	MGAT4C
FOXA3 (human)	3/207	0.341221	0.52177	0.950095	-0.618065	MEGF10;KCND2;CHAC2
BRCA1 (human)	20/1809	0.344675	0.522865	0.747599	-0.484767	SERPINB4;FZD5;MME;GABRA3;IRS4;PIPOX;SNORD1B;IFI30;RGMB;POU5F1P4;FAM101B;CYP2B6;DRAM1;ZFP42;POLR3G;MT1H;SNORD75;MDGA2;KIAA1804;CALN1
SREBF1 (human)	28/2587	0.346917	0.522865	1.03551	-0.671458	GABRB3;NRK;ZDHHC22;KIAA0040;HERC5;UGT8;PDZD4;AADACL3;FAM124A;ENPP1;SLC38A5;CBR1;CPT1A;CR2;SYT1;EPHX3;IRAK3;PARP14;PARP12;CCNA1;PPP2R2C;VSNL1;CTH;VEPH1;ZFP42;SCGB3A2;TLCD1;RAB17
RORA_2 (human)	1942-01-01	0.346474	0.522865	4.84956	-3.14461	FAM101B
Zfx (mouse)	1943-01-01	0.352913	0.529369	4.979	-3.16699	CCL28
EIF4EBP1 (human)	3/212	0.354624	0.529415	1.06043	-0.674414	PLA2G16;SLITRK3;KCTD14
SMARCA2 (human)	17/1536	0.360134	0.529739	0.955844	-0.607316	PCSK1;C13ORF38;PIPOX;TNFRSF11B;GABRG1;DPP4;CCNA1;GPR176;GNG4;CTH;CHEK2;PPP4R4;DNMT3B;OTX2;CD36;KIF1A;TAC1
FOXA2 (mouse)	16/1441	0.361568	0.529739	0.98807	-0.627792	UNC13A;LAMC2;TACR1;TEX15;GLB1L3;INHBE;CHEK2;CNTN1;KCTD14;FAM54A;EPHA1;SLC27A2;FGF12;KLKB1;CCL28;ATOH1
LEF1 (mouse)	19/1730	0.360847	0.529739	1.04355	-0.663042	GRIA1;GUCY2C;KCND2;GABRA5;TMEM132B;DSCC1;LRRC17;TFPI2;LY75;SHISA9;MGAT4C;PPP4R4;CNTN1;TRIM36;CD9;OTX2;CD36;PIM2;KLKB1
HNF1B (mouse)	1944-01-01	0.359287	0.529739	5.00257	-3.17849	CCL28
TAL1::TCF3 (human)	1945-01-01	0.3656	0.530709	4.72658	-2.99448	FAM101B
NME2 (human)	1945-01-01	0.3656	0.530709	5.08385	-3.22082	MYC
EGR1 (human)	8/681	0.367524	0.531056	0.930988	-0.589212	CHST9;TUBB2A;FAM124A;SOCS1;MYB;GPC4;SHISA9;FGF2
FOXF1 (human)	15/1352	0.369281	0.531158	1.01747	-0.643748	GABRB3;CR2;SP110;MPV17L;KIAA0040;UGT8;ATCAY;NR5A2;WIF1;C10ORF96;ZSCAN10;TRIM36;AP1S3;RAB39;STEAP2
CPEB1 (human)	1947-01-01	0.378039	0.541283	5.14022	-3.15513	LAMC2
Stat3 (mouse)	19/1762	0.391	0.557308	1.12166	-0.655764	CNTNAP3;MEGF10;TNFAIP6;CABLES1;GRPR;FGF2;DNM3;FGD4;TUBB2B;DRAM1;ATCAY;VSNL1;ORC1;MYC;NMU;PLP1;CD36;MDGA2;CCL28
Nkx2-5 (mouse)	6/515	0.406203	0.571222	0.958718	-0.53686	GABRQ;MLKL;SP110;MYB;SNORA74A;CCL28
Nr2e3 (mouse)	2/139	0.404634	0.571222	1.58366	-0.886812	MPV17L;CCL28
Arnt (mouse)	2/139	0.404634	0.571222	1.62948	-0.912472	ATCAY;CCL28
HIF1A (human)	17/1586	0.410131	0.571643	1.10653	-0.618816	GABRB3;PCSK1;ZNF560;C1ORF182;PIPOX;EPHX3;PARP12;VSIG10;NELL2;ATCAY;GNG4;CTH;AP1S3;TLCD1;FGFR4;INA;VGLL3
JDP2 (human)	16/1488	0.410049	0.571643	1.10761	-0.619422	FOXB1;CR2;SYT1;C13ORF38;MAMDC2;CUZD1;ETS1;LRP8;KIAA0040;INHBE;AADACL3;CTH;SRY;MDGA2;TAC1;PCK2
FOS (human)	15/1394	0.414145	0.574694	1.12167	-0.62131	ZNF483;HPGD;MLKL;GLDC;NRK;TFPI2;GRPR;CUZD1;DPP4;IL6;NR5A2;DPPA4;VEPH1;CD36;STEAP2
FOXO3A (human)	9/813	0.419583	0.574798	1.06106	-0.587549	GABRB3;DRAM1;WIF1;ZSCAN10;MPV17L;AP1S3;RAB39;ACTG2;KIAA0040
FOXL1 (human)	59/5755	0.417071	0.574798	1.08211	-0.599206	PIWIL2;MT1M;MPV17L;IRS4;POU5F1P3;ETS1;POU5F1P4;KIF5A;NEFM;CD36;PIM2;TRIM22;TIMP4;CR2;C9ORF135;MME;DTX3L;VASH2;FAM101B;PLA2G16;GAP43;WBSCR17;KIT;RAB39;SMPDL3B;DOCK2;SNORD80;GUCY2C;SLC22A3;HPGD;LUZP2;SLC43A1;AK5;COCH;UGT8;WIF1;C10ORF96;DSEL;SPP1;HESX1;BEND4;SYT1;FZD5;GABRA5;CABLES1;KIAA1244;NMI;FHDC1;MGAT4C;NELL2;MIR222;VEPH1;CTH;CYP2S1;SEMG1;TRIM36;SNORD20;CLC;FAM54A
HLF (human)	1954-01-01	0.419694	0.574798	4.25985	-2.35883	FAM101B
SP1 (human)	15/1406	0.427039	0.577327	1.19771	-0.657955	FZD5;EPHX3;COBL;SLC4A11;FBXL13;HERC5;PDZD4;GNG4;PPP4R4;DNMT3B;TLCD1;KIF1A;RAB39;FGFR4;KIAA1804
ETV4 (human)	15/1403	0.423814	0.577327	1.20675	-0.662925	SYT1;SP110;CCDC109B;SLC43A1;MAMDC2;EPHX3;LRP8;COCH;ACOXL;CAMKV;CHST4;MDGA2;C3ORF14;PCK2;ZNF860
PDX1 (human)	1955-01-01	0.425413	0.577327	4.47811	-2.46003	NR5A2
IRF9 (human)	1957-01-01	0.436683	0.587843	4.38369	-2.32903	FGF2
FOXM1 (human)	1958-01-01	0.442236	0.592784	4.40613	-2.30407	CCL28
SP3 (mouse)	12/1129	0.448009	0.597978	1.23264	-0.633824	FOXB1;PLA2G16;SYT1;TMEM132B;NFE2L3;PLP1;CABLES1;POLR3G;ITPR3;FBXL13;PARP14;SLC38A5
STAT5B (mouse)	18/1729	0.454292	0.603805	1.3203	-0.666098	CNTNAP3;HTR1D;COBL;IFI30;MGAT4C;FGD4;CCNA1;TUBB2B;CDCP1;MYC;ZSCAN10;SPP1;TAF4B;OTX2;MDGA2;SLC27A2;RNF133;RPRM
MTF1 (human)	15/1440	0.463574	0.611423	1.26479	-0.622232	MT1M;AK5;FBXL13;ETS1;KIAA0040;CCNA1;PLA2G16;TUBB2B;FAM124A;MT1H;AP1S3;SP140L;SLC38A5;ARHGEF5;CALN1
NFIL3 (human)	1962-01-01	0.463905	0.611423	3.82971	-1.88409	FAM101B
CREB1 (mouse)	9/849	0.469785	0.613179	1.24046	-0.606707	EIF4A2;GAP43;SYT1;GNG4;KIF1A;SMPDL3B;STEAP2;CCL28;VAT1L
PGR (human)	15/1447	0.471077	0.613179	1.34694	-0.658786	GABRB3;GLDC;CABLES1;A2ML1;PPP2R2C;SEMG1;SCNN1A;PLP1;TRIM36;CHAC2;CD36;SP140L;FGF12;TRIM22;VAT1L
MAFB (human)	1963-01-01	0.46919	0.613179	4.10919	-2.0098	ACOXL
ELF5 (mouse)	6/556	0.477217	0.618267	1.14004	-0.548171	MACC1;TFPI2;BEND4;ENPP1;GCNT4;CCL28
SPIB (human)	8/760	0.4848	0.618267	1.22155	-0.587366	NECAB1;FAM101B;AIM1;TNFAIP6;SCNN1A;KIF1A;ACTG2;KIAA0040
En1 (mouse)	10/957	0.481165	0.618267	1.26392	-0.607735	GABRB3;TUBB2A;SOCS1;FUT9;KCTD14;PARP14;IFI30;CCL28;VAT1L;CALN1
POU3F1 (human)	2/162	0.480851	0.618267	1.76792	-0.850078	CTH;AP1S3
Klf4 (mouse)	2/163	0.484029	0.618267	1.78985	-0.860624	TC2N;CCL28
FEV (human)	2/172	0.512085	0.650431	1.74103	-0.748853	FAM101B;IRAK3
SMAD3 (mouse)	1972-01-01	0.514479	0.650847	3.80332	-1.63345	KIF1A
MZF1 (human)	14/1389	0.516856	0.651239	1.43725	-0.616406	PCSK1;GABRG1;ADAMTS16;GYLTL1B;PPP2R2C;CHEK2;MYC;SCNN1A;DNMT3B;PLP1;MT1H;KIF1A;SP140L;CALN1
FOS (mouse)	17/1708	0.53255	0.66834	1.49236	-0.601357	CNTNAP3;FRMPD4;MOCOS;MPV17L;SLC4A11;ALDH1L2;ETS1;MGAT4C;FGD4;IL6;AIM1;ATCAY;DPPA3;CHEK2;KCTD14;CHAC1;CALN1
AP1 (mouse)	2/183	0.54499	0.681237	1.74423	-0.669515	KCTD14;CCL28
ESR2 (human)	1980-01-01	0.551492	0.686641	3.30348	-1.24192	FAM101B
USF1 (mouse)	12/1219	0.554179	0.687269	1.44869	-0.543301	DNM3;RINT1;MLKL;NMU;SPP1;VASH2;TNFRSF11B;PIM2;RAB17;SHISA9;ASS1;LRRC2
SP3 (human)	13/1332	0.565829	0.696235	1.49399	-0.540927	FZD5;EPHX3;COBL;SLC4A11;FBXL13;KIAA0040;SOCS1;GNG4;PPP4R4;TLCD1;RAB39;FGFR4;KIAA1804
FOXA2 (human)	1983-01-01	0.564636	0.696235	3.38412	-1.22528	OTX2
NFE2L2 (human)	1984-01-01	0.568931	0.697328	3.19716	-1.15258	FAM101B
NR5A2 (mouse)	17/1748	0.571408	0.697649	1.56123	-0.562104	PIWIL2;CBR1;UNC13A;FAM129A;VASH2;ZDHHC22;SHISA9;TC2N;TRHDE;INHBE;ADAMTS16;RNF125;ZFP42;KIT;KIF5A;RAB39;AP1M2
TBP (mouse)	31/3182	0.573977	0.69808	1.68606	-0.606006	CNTNAP3;FRMPD4;MPV17L;IRS4;SLC7A11;AADACL3;ACOXL;DSEL;MYB;SPP1;CHAC2;CD36;SRY;TAC1;HIST1H1A;RNF133;ZYG11A;SP110;CABLES1;NMI;TEX15;GAP43;DPPA3;CTH;VEPH1;CNTN1;SCGB3A2;FAM54A;RGS7BP;FGF12;CCL28
CRX (human)	13/1362	0.59807	0.724585	1.56728	-0.50491	HTR1D;MPV17L;TC2N;LRRC2;VSIG10;C6ORF132;RNF125;DPPA4;ZSCAN10;ZFP42;HLA-DRA;RAB39;SMPDL3B
NRF1 (mouse)	16/1676	0.601132	0.725504	1.61509	-0.518263	HPGD;ITPR3;HSD17B6;IFI30;SAMHD1;HPDL;NR5A2;DPPA4;ORC1;PSAT1;PPP4R4;MYB;KCTD14;TAF4B;TIMP4;PCK2
TEAD2 (mouse)	15/1591	0.619268	0.733269	1.60293	-0.497297	FOXB1;FZD5;TNFAIP6;BCL11A;IRS4;VASH2;ZDHHC22;CCNA1;SOCS1;BEND4;CHAC2;KIF1A;FGF12;VAT1L;CALN1
FOXF2 (human)	13/1379	0.615869	0.733269	1.61283	-0.500369	HTR1D;EPHX3;SAMHD1;ALDH1L2;VSIG10;PLA2G16;FAM101B;C6ORF132;RNF125;ZSCAN10;RAB39;PRODH;SMPDL3B
AHR (human)	13/1391	0.628209	0.733269	1.61503	-0.501053	MOCOS;VASH2;AK5;FBXL13;SHISA9;CLU;GLB1L3;CCNA1;PLA2G16;WIF1;DSEL;MYC;ZSCAN10
NR1I2 (human)	13/1387	0.624117	0.733269	1.62895	-0.505371	MLKL;PARP12;VSIG10;LRRC2;C6ORF132;NR5A2;GYLTL1B;WIF1;ZSCAN10;TLCD1;RAB17;RAB39;AP1M2
KLF4 (human)	14/1485	0.617546	0.733269	1.6456	-0.510536	GABRB3;MOCOS;ITPR3;IFI30;CUZD1;TUBB2B;DRAM1;PPP2R2C;PPP4R4;ZFP42;MT1H;OTX2;TLCD1;FGFR4
CEBPD (human)	14/1495	0.62748	0.733269	1.65398	-0.513137	FZD5;SP110;GLDC;TFPI2;EPHX3;IRAK3;TC2N;INHBE;MGAT4C;HERC5;AADACL3;IL6;ZSCAN10;EPHA1
ZNF148 (human)	15/1591	0.619268	0.733269	1.65758	-0.514253	CNTNAP3;GABRB3;MOCOS;COBL;ITPR3;IFI30;CUZD1;TUBB2B;DRAM1;PPP2R2C;MYB;MT1H;FGFR4;PRKG1;CALN1
FOXA1 (mouse)	16/1705	0.628481	0.733269	1.67997	-0.521199	PCSK1;NECAB1;MME;HSD17B6;ALDH1L2;LRRC2;ARNTL2;HPDL;AIM1;WIF1;CHEK2;ZFP42;KIT;HESX1;TRIM36;CHAC1
IRF7 (human)	1999-01-01	0.628516	0.733269	3.20298	-0.993702	RAB39
FOXI1 (human)	2/217	0.636659	0.740028	1.86261	-0.560769	FAM101B;GYLTL1B
RORA_1 (human)	1/107	0.656862	0.760704	2.93143	-0.801778	FAM101B
GABPA (human)	1/108	0.66025	0.761827	2.9927	-0.814121	EPHX3
MYOD1 (human)	1/109	0.663605	0.762904	2.96023	-0.801106	PCK2
Hand1::Tcfe2a (mouse)	1/110	0.666927	0.763935	2.98182	-0.802924	CCL28
Gata1 (mouse)	17/1863	0.675449	0.770893	1.82962	-0.476078	CBR1;NECAB1;CR2;NRK;MACC1;GABRA3;CLU;GLB1L3;MGAT4C;FGD4;KIT;SLITRK3;NFE2L3;OTX2;CD36;CCL28;PRKG1
GATA6 (human)	13/1447	0.683087	0.776795	1.73511	-0.43825	GABRB3;TNFAIP6;CKMT1A;HIST1H1T;MGAT4C;RNF125;NR5A2;C10ORF96;SCNN1A;OTX2;SRY;PIM2;TRIM22
NR5A1 (mouse)	9/1020	0.686194	0.777522	1.71924	-0.432635	DRAM1;KCND2;CTH;ENPP1;ZDHHC22;RAB17;FGF2;PPM1E;TIMP4
NR1H2 (human)	4/479	0.70193	0.789671	1.68484	-0.397855	DRAM1;MLKL;SAMHD1;VSIG10
ETS1 (mouse)	15/1681	0.701245	0.789671	1.83917	-0.434299	GUCY2C;BCL11A;GABRA5;SLC4A11;COBL;SHISA9;GLB1L3;RINT1;WBSCR17;CHEK2;ZSCAN10;SPP1;CD36;PRODH;HIST1H1A
APEX1 (human)	12/1373	0.714128	0.799273	1.81119	-0.405801	RNF125;FAM124A;ZSCAN10;SLC43A1;MPV17L;DNMT3B;KCTD14;DPPA5;PRODH;VSIG10;AP1M2;MFSD2A
TP53 (mouse)	11/1266	0.71554	0.799273	1.82746	-0.409446	RINT1;TUBB2A;DPPA4;DPPA3;GLDC;HESX1;TACR3;TEX15;FGFR4;AP1M2;INHBE
PURA (human)	4/492	0.721366	0.802934	1.70453	-0.374115	MYC;DNMT3B;SHISA9;ARHGEF5
KLF11 (human)	12/1388	0.727628	0.807052	1.88757	-0.404633	GABRB3;TUBB2B;DRAM1;PPP2R2C;MOCOS;ZFP42;ITPR3;MT1H;OTX2;IFI30;FGFR4;CUZD1
PPARA (human)	2/271	0.751683	0.830807	1.90263	-0.352666	SLC7A11;LRP8
TFAP2D (human)	11/1324	0.767051	0.841885	1.8916	-0.325568	FGD4;C6ORF132;RNF125;ZSCAN10;AP1S3;STEAP1;SAMHD1;PRODH;LRRC2;MGC87042;VSIG10
JUND (mouse)	15/1764	0.766846	0.841885	1.90148	-0.327268	EIF4A2;CNTNAP3;MAMDC2;SLC43A1;THBS2;ACTG2;AADACL3;CCNA1;MYB;CD9;GCNT4;AP1S3;KIF1A;MDGA2;PCK2
TP63 (human)	12/1443	0.773578	0.843173	1.87603	-0.320019	GABRB3;NR5A2;HPGD;DPPA4;SP110;DNMT3B;GCNT4;CD36;AP1S3;FGFR4;AP1M2;ACTG2
IRF8 (mouse)	15/1770	0.771189	0.843173	1.97037	-0.336111	NECAB1;IFITM1;SP110;DSCC1;TFPI2;SLC43A1;CRABP1;LY75;TEX15;IFI30;GABRG1;MGAT4C;HPDL;FGD4;SPP1
CACYBP (human)	11/1350	0.787934	0.855859	1.9267	-0.299891	GABRB3;AADACL3;TUBB2B;TUBB2A;PPP2R2C;MOCOS;OTX2;PRODH;IFI30;INHBE;ZNF860
PCBP1 (human)	11/1360	0.795601	0.861218	1.92401	-0.287461	FZD5;GNG4;PPP4R4;MOCOS;EPHX3;COBL;SLC4A11;TLCD1;RAB39;KIAA1804;LRP8
ZBTB7A (human)	11/1373	0.805269	0.868698	1.98922	-0.280003	HERC5;PDZD4;CCDC109B;MOCOS;SLC43A1;EPHX3;NRIP3;SLC4A11;TLCD1;KIF1A;PPM1E
AHR (mouse)	3/454	0.829557	0.890419	1.79675	-0.208536	NR5A2;TACR3;FGFR4
RUNX2 (mouse)	14/1750	0.831058	0.890419	2.04207	-0.237009	CBR1;IFITM1;SP110;LY75;VASH2;SAMHD1;FGF2;LRRC2;ARNTL2;GPR176;DPPA4;STEAP1;SLC27A2;RPRM
RXRA (human)	11/1422	0.838706	0.895568	1.96587	-0.216831	ZNF483;ZNF560;HTR1D;HLA-DRA;KCTD14;CD36;RAB17;SMPDL3B;FGF2;VSIG10;AP1M2
PITX1 (human)	11/1448	0.854577	0.909432	2.02965	-0.192685	C6ORF132;ATCAY;NR5A2;KCTD14;DPPA5;RAB39;SMPDL3B;SAMHD1;PARP12;VSIG10;ARHGEF5
SP1 (mouse)	19/2360	0.857622	0.909599	2.14395	-0.203141	GABRB3;KCNG3;ZYG11A;CPT1A;FZD5;BCL11A;ITPR3;ZDHHC22;FBXL13;RGMB;ETS1;FAM101B;CYP2S1;PPP4R4;DSEL;BEND4;NEFM;TLCD1;FGF12
RXRA (mouse)	3/507	0.880249	0.930464	1.87816	-0.135361	CNTN1;ACTG2;ASS1
NR1H3 (human)	10/1385	0.88414	0.930506	2.07038	-0.149123	AADACL3;ZNF560;C6ORF132;DRAM1;MLKL;TLCD1;HSD17B6;SAMHD1;PARP12;VSIG10
HIVEP1 (human)	1/218	0.886196	0.930506	2.26646	-0.163246	MYB
SRF (mouse)	13/1782	0.903593	0.94384	2.07155	-0.119732	FOXB1;CR2;IFITM1;CABLES1;TEX15;MGAT4C;FAM101B;DPPA3;ENPP1;CD36;FAM54A;SMPDL3B;RPRM
NFATC3 (mouse)	13/1801	0.910881	0.94384	2.14702	-0.124094	GUCY2C;GABRA5;TNFRSF11B;TEX15;DPP4;NR5A2;GYLTL1B;KIT;HESX1;FGFR4;CHST4;PRKG1;ATOH1
GTF2I (human)	1/237	0.905828	0.94384	2.19386	-0.126801	MDGA2
CBEPB (mouse)	26/3275	0.907892	0.94384	2.24185	-0.129575	LUZP2;LRRC17;MPV17L;SLC7A11;CLU;GLB1L3;SLC7A3;ACOXL;GPR176;ATCAY;FUT9;ZSCAN10;CD36;PIM2;SRY;PRKG1;GABRQ;CR2;BCL11A;MACC1;TEX15;RINT1;FGFR4;FGF12;KLKB1;ARHGEF5
LOC135440 (human)	1/247	0.914765	0.944758	2.2552	-0.128156	NELL2
RARA (human)	9/1379	0.932443	0.959867	2.15852	-0.0884134	AADACL3;ZNF560;NR5A2;MLKL;WIF1;HTR1D;SAMHD1;VSIG10;AP1M2
FOXO3A (mouse)	2/597	0.982187	0.996409	2.04589	-0.00735978	TEX15;HSD17B6
SREBF1 (mouse)	10/1735	0.979583	0.996409	2.20487	-0.00793169	GUCY2C;FGD4;ACOXL;NR5A2;GLDC;KCTD14;RAB17;RGMB;EPHA1;RNF133
NRF1 (human)	6/1356	0.993007	0.996409	2.20804	-0.00794307	CBR1;PDZD4;FAM124A;TLCD1;ARHGEF5;CALN1
SMAD4 (mouse)	9/1580	0.976698	0.996409	2.20965	-0.00794885	ADAMTS16;ZYG11A;PPP2R2C;PPP4R4;TMEM132B;BEND4;IRAK3;TRHDE;PARP12
YY1 (mouse)	10/1700	0.975304	0.996409	2.23259	-0.00803139	FAM101B;PLA2G16;CCDC109B;CD9;PIPOX;PIM2;RGMB;MDGA2;PARP14;SAMHD1
CPEB1 (mouse)	8/1748	0.996409	0.996409	2.24614	-0.00808015	FGD4;NR5A2;GLDC;FRMPD4;TC2N;RGMB;EPHA1;RNF133
NFYA (mouse)	8/1748	0.996409	0.996409	2.26385	-0.00814383	FGD4;NR5A2;GLDC;FRMPD4;TC2N;RGMB;EPHA1;RNF133
NFYB (mouse)	8/1748	0.996409	0.996409	2.26907	-0.00816261	FGD4;NR5A2;GLDC;FRMPD4;TC2N;RGMB;EPHA1;RNF133
JUN (mouse)	8/1699	0.995054	0.996409	2.2963	-0.00826059	GUCY2C;NRK;NFE2L3;NRIP3;SHISA9;PRKG1;ACTG2;CALN1

## Sheet: Cluster 4
Term	Overlap	P-value	Adjusted P-value	Z-score	Combined Score	Genes
ZBTB16 (human)	12/1572	8.26758e-05	0.0130038	-1.74496	7.5775	FSTL5;MFAP4;KCNH5;SLC5A9;MYO3B;TRPA1;SLC6A15;CDHR1;STK32A;FAM159B;GLIPR1L1;CSMD1
NFAT2 (human)	11/1376	0.000114571	0.0130038	-1.72533	7.49226	CALCR;PCDH10;TBX22;GAD1;QPCT;GSC;GPR64;SLC39A8;ASB5;RGS7;TTC39B
GATA2 (human)	33/9985	0.000857806	0.0649073	-1.75124	4.78928	SERPINE2;PCDH10;GPR64;FAM159B;FGF4;DTWD2;FSTL5;MYCT1;T;TBX22;GSC;PMEPA1;NEFL;SLC39A8;STK32A;CSMD1;CER1;GPR39;KCNH5;TRPA1;APOBEC3G;PCDH20;SLC6A15;OR5P3;OR5P2;KIAA1161;IL17RD;TTC39B;KLF8;CYP26A1;MFAP4;LOC648987;SP5
RUNX1 (human)	17/3857	0.00171594	0.0973795	-1.55116	3.61288	CDA;APOBEC3G;PCDH10;GAD1;ATP12A;FGF4;TTC39B;KLF8;DTWD2;MFAP4;SLC5A9;TBX22;QPCT;PMEPA1;STK32A;WNT3;MFAP3L
ETV4 (human)	9/1403	0.00238106	0.1081	-1.6864	3.75174	KLF8;DKK4;T;PCDH20;QPCT;TNS4;ARSE;NODAL;FGF4
FOXL1 (human)	21/5755	0.0045457	0.128984	-1.77097	3.62705	TRPA1;SERPINE2;APOBEC3G;PCDH10;SLC6A15;TTC39B;KLF8;MFAP4;LOC648987;MYCT1;TBC1D2;T;TBX22;CDHR1;PMEPA1;SLC39A8;ASB5;CSMD1;ARSE;WNT3;MIXL1
JDP2 (human)	9/1488	0.00351983	0.128984	-1.68712	3.45534	MFAP4;FSTL5;CDA;CALCR;TBX22;ARMC4;PMEPA1;FAM159B;WNT3
E2F1 (human)	17/4207	0.00434209	0.128984	-1.49271	3.05717	KCNH5;APOBEC3G;SERPINE2;PCDH10;SLC6A15;GAD1;KIAA1161;FGF4;CYP26A1;CALCR;T;TBX22;CDHR1;QPCT;SP5;WNT3;MFAP3L
NFIC (human)	17/4403	0.00691423	0.146551	-1.62924	3.12875	KCNH5;PCDH10;SLC6A15;GPR64;OR5P3;KLF8;DTWD2;CYP26A1;FSTL5;CALCR;ZIC2;TBX22;CDHR1;SP5;SLC39A8;STK32A;MFAP3L
NR5A1 (human)	8/1389	0.00793356	0.146551	-1.6101	3.092	KLF8;CYP26A1;KCNH5;SERPINE2;PCDH20;QPCT;FAM159B;RGS7
ETS2 (human)	8/1341	0.00647406	0.146551	-1.59399	3.06106	FGF17;DTWD2;CALCR;SLC5A9;PCDH20;GSC;GAD1;RGS7
BCL6 (human)	8/1399	0.00826673	0.146551	-1.55825	2.99244	KLF8;DKK4;MYCT1;PCDH10;TBX22;SLC6A15;SLC39A8;STK32A
NFE2 (human)	285591	0.00839281	0.146551	-1.48366	2.8492	MFAP4;CDA;KCNH5;T;SERPINE2;QPCT;ARMC4;GPR64;FAM159B;NODAL;WNT3;TTC39B
GATA6 (human)	8/1447	0.0100156	0.149164	-1.54972	2.94865	KCNH5;CALCR;NEFL;IL17RD;ATP12A;ARSE;RGS7;TTC39B
RELB (human)	8/1469	0.0109042	0.149164	-1.54218	2.93431	SERPINE2;TRPA1;TBX22;SLC6A15;KIAA1161;ARSE;CSMD1;FGF4
SRF (human)	14/3420	0.00925699	0.149164	-1.43934	2.73865	GPR39;KCNH5;PCDH10;PCDH20;SLC6A15;DTWD2;KLF8;FSTL5;TBX22;CDHR1;ASB5;STK32A;NODAL;MFAP3L
NFKB1 (human)	14/3497	0.0111709	0.149164	-1.3901	2.64494	KCNH5;PCDH10;GAD1;ATP12A;FGF4;FGF17;CYP26A1;MFAP4;MYO3B;CDHR1;GSC;TNS4;CSMD1;RGS7
TBP (human)	214339	0.0127047	0.160221	-1.38656	2.53906	KLF8;MYCT1;SLC5A9;MYO3B;TBX22;SLC6A15;PCDH20;SLC39A8;ASB5;FAM159B;TTC39B
VDR (human)	32174	0.0150876	0.17144	-1.72748	3.04644	SLC39A8;TTC39B
NFYA (human)	237349	0.0151049	0.17144	-1.42095	2.50588	KLF8;DTWD2;CYP26A1;CALCR;PCDH10;TBX22;CDHR1;ASB5;STK32A;CSMD1;MFAP3L
ETS1 (human)	17/4827	0.01684	0.182032	-1.47877	2.51918	GPR39;CDA;KCNH5;APOBEC3G;SERPINE2;GAD1;GPR64;FGF4;KLF8;FGF17;MFAP4;TBX22;ARMC4;OR52A1;CSMD1;CER1;WNT3
CRTC3 (human)	6/1008	0.0183294	0.189126	-1.54991	2.58113	MFAP4;ARMC4;ASB5;TNS4;ATP12A;RGS7
SPI1 (human)	8/1638	0.0198127	0.195542	-1.54355	2.51904	DTWD2;DKK4;MYCT1;TBC1D2;CALCR;IL17RD;MFAP3L;FGF4
SREBF2 (human)	7/1361	0.0226293	0.214036	-1.4664	2.26062	KLF8;CALCR;TRPA1;PCDH20;ARMC4;NEFL;KIAA1161
ZBTB7A (human)	7/1373	0.023603	0.214315	-1.42149	2.18953	CYP26A1;SERPINE2;PCDH10;PMEPA1;GPR64;KIAA1161;MFAP3L
RELA (human)	319893	0.0266404	0.232592	-1.32895	1.93824	FGF17;CYP26A1;KCNH5;T;SERPINE2;PCDH10;GAD1;ATP12A;CSMD1;MFAP3L;FGF4
MTF1 (human)	7/1440	0.0295804	0.248695	-1.44644	2.01277	CYP26A1;SERPINE2;PCDH10;GAD1;ARMC4;SP5;RGS7
GLI2 (human)	7/1465	0.0320542	0.259868	-1.37248	1.84953	CDA;GSC;SP5;NEFL;STK32A;RGS7;TTC39B
NFKB1 (mouse)	505833	0.0360207	0.281956	-1.18161	1.49592	FGF17;DKK4;ZIC2;SERPINE2;T;PCDH10;GSC;QPCT;SLC6A15;PMEPA1;WNT3;FGF4
POU3F1 (human)	2/162	0.0456902	0.293795	-1.47945	1.81214	KLF8;SLC6A15
HOXD9 (human)	7/1543	0.040665	0.293795	-1.3651	1.67207	CALCR;T;TBX22;ASB5;IL17RD;ATP12A;ARSE
MAX (human)	12632	0.0463841	0.293795	-1.31926	1.61593	CYP26A1;CDA;SERPINE2;SLC6A15;SLC39A8;OR5P2;RGS7;MFAP3L
SMAD4 (mouse)	7/1580	0.0452384	0.293795	-1.28923	1.57914	MFAP4;ZIC2;GSC;PMEPA1;SP5;RGS7;MFAP3L
JUN (human)	393308	0.0414691	0.293795	-1.2452	1.52521	DKK4;FSTL5;MFAP4;CDA;KCNH5;TRPA1;TBX22;QPCT;ASB5;ARSE;TTC39B
USF2 (human)	13/3792	0.045547	0.293795	-1.15789	1.41827	SERPINE2;SLC6A15;GAD1;ATP12A;TTC39B;DKK4;CYP26A1;MYCT1;PMEPA1;SLC39A8;CSMD1;NODAL;RGS7
HINFP (human)	419239	0.0478873	0.293795	-1.14139	1.39806	MFAP4;ZIC2;SERPINE2;TBX22;SP5;GPR64;STK32A;IL17RD;NODAL;RGS7;MFAP3L
TCF4 (human)	14/4210	0.0473935	0.293795	-1.0649	1.30437	CDA;TRPA1;GPR64;TTC39B;DKK4;MYCT1;TBX22;QPCT;GSC;SP5;STK32A;CER1;WNT3;MFAP3L
NR5A1 (mouse)	5/1020	0.0611375	0.3234	-1.2726	1.4366	KLF8;ZIC2;CDHR1;CSMD1;MIXL1
TFAP2A (human)	625997	0.066323	0.3234	-1.254	1.41559	EOMES;CYP26A1;KCNH5;SLC5A9;ZIC2;SERPINE2;PCDH10;CDHR1;SP5;NEFL;WNT3;MFAP3L
KLF11 (human)	6/1388	0.0683078	0.3234	-1.21235	1.36858	CDA;CALCR;SP5;PMEPA1;STK32A;FGF4
NFYB (mouse)	7/1748	0.070156	0.3234	-1.18235	1.33472	FGF17;TBX22;CDHR1;PCDH20;OVCH2;CER1;WNT3
ETS1 (mouse)	7/1681	0.0593889	0.3234	-1.1754	1.32687	MYCT1;SERPINE2;QPCT;ARMC4;GPR64;CSMD1;MFAP3L
CPEB1 (mouse)	7/1748	0.070156	0.3234	-1.16955	1.32026	FGF17;TBX22;CDHR1;PCDH20;OVCH2;CER1;WNT3
SP1 (mouse)	168257	0.054257	0.3234	-1.16664	1.31698	ZIC2;SERPINE2;PCDH10;GSC;NEFL;PMEPA1;SP5;NODAL;MFAP3L
IRF2 (human)	6/1412	0.0728965	0.3234	-1.16447	1.31453	MFAP4;CDA;KCNH5;PMEPA1;SLC39A8;ARSE
MYOG (human)	6/1404	0.0713473	0.3234	-1.15935	1.30875	MYO3B;SERPINE2;T;GAD1;GSC;WNT3
LEF1 (mouse)	7/1730	0.0671538	0.3234	-1.15139	1.29976	T;CDHR1;PMEPA1;GPR64;SP5;FAM159B;MIXL1
SAMD9L (human)	6/1415	0.0734825	0.3234	-1.13206	1.27794	CYP26A1;CDA;TRPA1;QPCT;SLC39A8;TTC39B
NFIA (human)	6/1416	0.0736784	0.3234	-1.1225	1.26715	FSTL5;CDA;PCDH10;PMEPA1;TNS4;ARSE
HMGA1 (mouse)	7/1748	0.070156	0.3234	-1.11001	1.25306	FSTL5;TBC1D2;SLC6A15;QPCT;OVCH2;NEFL;TNS4
CRTC1 (human)	5/1086	0.0755074	0.3234	-1.09536	1.23652	MFAP4;FAM159B;GLIPR1L1;CER1;NODAL
GATA3 (human)	221217	0.0733923	0.3234	-1.08959	1.23	TBC1D2;TRPA1;SERPINE2;TBX22;SP5;PMEPA1;STK32A;GLIPR1L1;RGS7
ETV4 (mouse)	7/1773	0.0744597	0.3234	-1.00848	1.13844	CDA;CALCR;TRPA1;CDHR1;OVCH2;ATP12A;CER1
USF1 (human)	6/1441	0.0786762	0.330732	-1.10707	1.22491	CYP26A1;SERPINE2;SLC6A15;SLC39A8;OR5P2;RGS7
SP3 (mouse)	5/1129	0.0857887	0.33723	-1.05221	1.14375	CYP26A1;MFAP4;PCDH10;SLC6A15;CSMD1
SND1 (human)	6/1473	0.0853514	0.33723	-1.02316	1.11216	FGF17;CYP26A1;ZIC2;TBX22;GAD1;ATP12A
NKX2-8 (human)	2/256	0.100331	0.33723	-1.02281	1.11178	SLC6A15;MFAP3L
UBTF (human)	6/1493	0.089681	0.33723	-1.01229	1.10035	SERPINE2;SP5;PMEPA1;NEFL;WNT3;RGS7
KLF4 (human)	6/1485	0.0879347	0.33723	-1.00262	1.08984	CDA;CALCR;SP5;PMEPA1;STK32A;FGF4
MIR133B (human)	6/1500	0.0912249	0.33723	-0.996911	1.08363	CYP26A1;APOBEC3G;CDHR1;GPR64;NODAL;RGS7
ELF3 (human)	6/1488	0.0885873	0.33723	-0.996669	1.08337	FGF17;TRPA1;TNS4;STK32A;ARSE;FGF4
CREB1 (mouse)	4/849	0.100795	0.33723	-0.954103	1.0371	FSTL5;CALCR;T;STK32A
ATF2 (human)	6/1517	0.0950356	0.33723	-0.941262	1.02314	CDA;SERPINE2;PCDH10;GAD1;CSMD1;MFAP3L
Myb (mouse)	913	0.0991446	0.33723	-0.888708	0.966016	CALCR;ZIC2;GAD1;ATP12A;TNS4;IL17RD;FGF4
GATA1 (human)	284769	0.101411	0.33723	-0.791856	0.86074	CALCR;SERPINE2;PCDH10;TBX22;CDHR1;QPCT;ARMC4;GLIPR1L1;TTC39B
NR5A2 (human)	699775	0.0916794	0.33723	-0.785055	0.853347	CYP26A1;MFAP4;CDA;KCNH5;CALCR;QPCT;PMEPA1;TNS4;CSMD1;NODAL;RGS7;FGF4
E2F1 (mouse)	422496	0.0984684	0.33723	-0.782451	0.850516	DKK4;CYP26A1;MYCT1;PCDH10;SLC6A15;SP5;SLC39A8;WNT3;MIXL1;FGF4
LEF1 (human)	14/4658	0.094141	0.33723	-0.700105	0.761007	SLC6A15;GAD1;FAM159B;IL17RD;FGF4;TTC39B;DTWD2;MFAP4;MYCT1;TBX22;SP5;SLC39A8;WNT3;NODAL
ESR2 (mouse)	18629	0.102506	0.33723	-0.171533	0.186455	FGF4
NKX3-1 (human)	2/264	0.105571	0.342351	-1.07942	1.15705	KCNH5;GPR64
ZNF148 (human)	6/1591	0.112621	0.360071	-0.83653	0.854477	CDA;CALCR;SP5;PMEPA1;STK32A;FGF4
STAT3 (human)	313988	0.116161	0.366231	-0.6955	0.698624	CYP26A1;SERPINE2;CDHR1;GAD1;GSC;SLC39A8;CER1;MFAP3L;FGF4
MEF2A (human)	328964	0.124172	0.386123	-0.705405	0.671263	MYCT1;KCNH5;TRPA1;SLC6A15;GAD1;GPR64;GLIPR1L1;ARSE;TTC39B
XBP1 (human)	3/605	0.132207	0.400148	-0.966809	0.885521	CDA;SP5;KIAA1161
TFAP2A (mouse)	6/1663	0.131245	0.400148	-0.75352	0.690165	GPR39;KCNH5;T;ATP12A;CER1;FGF4
MYC (human)	5/1302	0.134134	0.400637	-0.811819	0.74257	CYP26A1;SERPINE2;SLC6A15;SLC39A8;RGS7
MZF1_5-13 (human)	2/316	0.141258	0.405895	-1.03234	0.930824	OVCH2;STK32A
CBEPB (mouse)	502484	0.137971	0.405895	-0.627039	0.565377	MYCT1;KCNH5;TRPA1;GSC;PCDH20;NEFL;PMEPA1;GLIPR1L1;CSMD1;CER1
SMAD3 (mouse)	26299	0.14091	0.405895	-0.361542	0.325989	PCDH20
IRF2 (mouse)	6/1706	0.14305	0.405904	-0.683059	0.615872	KLF8;FSTL5;CALCR;TBX22;SLC6A15;ASB5
TCFAP2A (human)	5/1367	0.154967	0.40696	-0.726546	0.653195	ZIC2;SERPINE2;SP5;WNT3;MFAP3L
E2F6 (human)	5/1358	0.152003	0.40696	-0.701316	0.630512	GPR39;ZIC2;PCDH10;GAD1;PMEPA1
NFYA (mouse)	6/1748	0.15505	0.40696	-0.680753	0.612025	FGF17;TBX22;CDHR1;OVCH2;CER1;WNT3
AHR (human)	5/1391	0.162991	0.40696	-0.669417	0.601834	GAD1;GSC;ATP12A;FGF4;TTC39B
FOS (human)	5/1394	0.164006	0.40696	-0.64493	0.579819	DKK4;ASB5;ARSE;CER1;WNT3
MZF1 (human)	5/1389	0.162316	0.40696	-0.639439	0.574882	CYP26A1;MFAP4;TBC1D2;SLC5A9;RGS7
JUND (mouse)	6/1764	0.15974	0.40696	-0.628286	0.564855	CDA;FSTL5;T;ASB5;STK32A;WNT3
REL (mouse)	6/1752	0.156217	0.40696	-0.622928	0.560038	FGF17;MYCT1;ZIC2;PCDH20;GSC;TNS4
Prrx2 (mouse)	111582	0.172778	0.40696	-0.620318	0.557692	GPR39;CALCR;MYO3B;GAD1;SLC6A15;ASB5;STK32A
MYB (human)	5/1409	0.169121	0.40696	-0.607855	0.546486	MYCT1;TRPA1;SERPINE2;GPR64;TTC39B
POU2F1 (human)	5/1399	0.165704	0.40696	-0.605567	0.54443	KCNH5;CALCR;MYO3B;TBX22;NEFL
IRF8 (mouse)	6/1770	0.161515	0.40696	-0.587847	0.528499	GPR39;CDHR1;QPCT;GPR64;STK32A;RGS7
SNAI2 (human)	5/1428	0.175692	0.40696	-0.555333	0.499268	DKK4;CYP26A1;GAD1;NODAL;TTC39B
TCF3 (human)	5/1428	0.175692	0.40696	-0.542868	0.488061	DKK4;CYP26A1;GAD1;NODAL;TTC39B
SNAI1 (human)	5/1428	0.175692	0.40696	-0.530353	0.47681	DKK4;CYP26A1;GAD1;NODAL;TTC39B
CBEPB (human)	255154	0.169616	0.40696	-0.472658	0.424939	DTWD2;MYCT1;SLC6A15;SLC39A8;ATP12A;KIAA1161;GLIPR1L1;CSMD1
YY1 (human)	16/6042	0.174155	0.40696	-0.47025	0.422774	KCNH5;APOBEC3G;GAD1;TTC39B;MYCT1;TBC1D2;CALCR;SLC5A9;MYO3B;T;TBX22;ARMC4;NEFL;ASB5;CER1;MFAP3L
SND1 (mouse)	32874	0.172539	0.40696	-0.20577	0.184996	SLC6A15
ELK4 (human)	5/1453	0.184489	0.423021	-0.514318	0.442485	KLF8;TBC1D2;GAD1;PMEPA1;SLC39A8
REPIN1 (human)	5/1466	0.18913	0.423116	-0.495385	0.426085	FSTL5;KCNH5;T;ARMC4;MFAP3L
PRDM1 (human)	5/1468	0.189848	0.423116	-0.473213	0.407015	GPR39;CDA;APOBEC3G;SLC6A15;NEFL
Gata1 (mouse)	6/1863	0.190123	0.423116	-0.377089	0.324338	KCNH5;CALCR;T;QPCT;SLC39A8;MFAP3L
MZF1_1-4 (human)	294234	0.197594	0.423225	-0.575964	0.495243	FGF17;KCNH5;SERPINE2;GAD1;OVCH2;PMEPA1;STK32A;ATP12A
ARID3A (mouse)	6/1893	0.199764	0.423225	-0.469551	0.403744	MYO3B;CDHR1;GAD1;SLC6A15;TNS4;STK32A
TEAD2 (human)	5/1486	0.196354	0.423225	-0.426638	0.366845	DTWD2;MFAP4;ZIC2;PCDH10;WNT3
TFAP2C (human)	5/1485	0.19599	0.423225	-0.39187	0.33695	CYP26A1;SERPINE2;TBX22;PMEPA1;FGF4
MIB2 (human)	5/1490	0.19781	0.423225	-0.34657	0.297998	SERPINE2;PCDH10;GAD1;CDHR1;PMEPA1
RORA_1 (human)	1/107	0.201358	0.423225	-0.149043	0.128155	CALCR
Pax2 (mouse)	5/1516	0.207374	0.43187	-0.496067	0.416513	KCNH5;T;ATP12A;STK32A;MFAP3L
TEAD1 (human)	5/1547	0.21898	0.451896	-0.34047	0.270437	FSTL5;CDA;MYCT1;ASB5;KIAA1161
TP53 (human)	353039	0.24311	0.497171	-0.194886	0.13619	FSTL5;TRPA1;PMEPA1;GPR64;KIAA1161;CSMD1;ARSE;FGF4
SRY (human)	2/469	0.255932	0.518719	-0.596446	0.391502	SLC6A15;MIXL1
RELA (mouse)	5/1656	0.261327	0.524967	-0.24723	0.15932	CYP26A1;PCDH10;PMEPA1;WNT3;FGF4
MYOD1 (mouse)	5/1672	0.267716	0.530031	-0.239279	0.151899	FGF17;MFAP4;KCNH5;CDHR1;CER1
IKZF1 (mouse)	5/1674	0.268518	0.530031	-0.215655	0.136902	SLC5A9;T;GSC;OVCH2;FGF4
SPI1 (mouse)	5/1680	0.270925	0.530173	-0.215229	0.136574	EOMES;CDA;QPCT;TNS4;RGS7
PURA (human)	2/492	0.273665	0.530957	-0.40474	0.25623	PCDH20;GAD1
FOXA1 (mouse)	5/1705	0.281011	0.536046	-0.233293	0.145467	DKK4;FSTL5;TBX22;GAD1;RGS7
HNF4A (human)	83063	0.280599	0.536046	-0.182298	0.113669	DKK4;SLC6A15;GAD1;ARMC4;STK32A;RGS7
FOXC1 (human)	30/13142	0.284504	0.536781	-0.274618	0.170858	SERPINE2;PCDH10;GPR64;FAM159B;FGF4;MYCT1;SLC39A8;STK32A;ARSE;WNT3;CER1;MFAP3L;EOMES;KCNH5;APOBEC3G;SLC6A15;GAD1;KIAA1161;TTC39B;DKK4;KLF8;MFAP4;LOC648987;TBC1D2;SLC5A9;QPCT;ASB5;OR52A1;NODAL;MIXL1
SREBF1 (mouse)	5/1735	0.293219	0.536781	-0.163204	0.10154	TBX22;CDHR1;PCDH20;OVCH2;WNT3
ELK1 (mouse)	5/1727	0.289953	0.536781	-0.138906	0.0864225	TBC1D2;PCDH10;PMEPA1;FGF4;RGS7
RBPJ (mouse)	5/1735	0.293219	0.536781	-0.113974	0.0709108	FSTL5;CALCR;MYO3B;GPR64;STK32A
SREBF1 (human)	251105	0.290887	0.536781	-0.0924881	0.0575429	CYP26A1;KCNH5;CALCR;T;SLC6A15;PMEPA1;WNT3
ELF5 (mouse)	2/556	0.322861	0.548424	-0.281331	0.168998	FSTL5;CER1
BRCA1 (human)	5/1809	0.323739	0.548424	-0.207717	0.124777	CALCR;PMEPA1;ASB5;STK32A;FAM159B
CACYBP (human)	4/1350	0.309241	0.548424	-0.162413	0.0975625	FGF17;KCNH5;APOBEC3G;FGF4
PLAU (human)	4/1362	0.314926	0.548424	-0.15233	0.0915055	FSTL5;KCNH5;PMEPA1;KIAA1161
CBEPA (mouse)	5/1764	0.305118	0.548424	-0.133815	0.0803838	FGF17;KLF8;CALCR;ASB5;STK32A
CBEPA (human)	4/1366	0.316824	0.548424	-0.107599	0.0646355	ZIC2;CDHR1;PMEPA1;KIAA1161
LTF (human)	4/1363	0.315401	0.548424	-0.10535	0.0632845	PCDH10;TBX22;ASB5;MFAP3L
JUND (human)	4/1380	0.323474	0.548424	-0.0813006	0.0488378	DKK4;MYCT1;CER1;RGS7
Sox2 (mouse)	5/1797	0.318757	0.548424	-0.0811846	0.0487682	DTWD2;SLC5A9;CALCR;TBX22;GLIPR1L1
PITX2 (human)	594860	0.309854	0.548424	0.0651999	-0.0391661	DTWD2;DKK4;MYO3B;TBX22;ASB5;IL17RD;CSMD1;ARSE;TTC39B
FOXO3A (mouse)	2/597	0.354008	0.576784	-0.138434	0.0761787	KLF8;FSTL5
FOXA3 (human)	1/207	0.351965	0.576784	-0.0577706	0.0317904	SLC39A8
FOXI1 (human)	1/217	0.365393	0.576784	-0.00925793	0.00509453	MIXL1
FOXF1 (mouse)	1/206	0.350607	0.576784	-0.00285408	0.00157057	PCDH10
RORB (human)	3/1035	0.365889	0.576784	0.00718766	-0.00395528	TBC1D2;PCDH20;SP5
PITX1 (human)	4/1448	0.355918	0.576784	0.012473	-0.00686374	DKK4;SLC6A15;ARSE;TTC39B
PGR (human)	4/1447	0.355439	0.576784	0.0130821	-0.00719895	DKK4;QPCT;IL17RD;TTC39B
KLF13 (human)	4/1453	0.358308	0.576784	0.0385339	-0.0212047	KLF8;CDA;GSC;NODAL
EIF4EBP1 (human)	1/212	0.358713	0.576784	0.0490433	-0.0269879	TTC39B
POU2F2 (human)	325980	0.36135	0.576784	0.172098	-0.0947032	DKK4;KCNH5;CALCR;MYO3B;TBX22;QPCT;CER1
NR2F1 (human)	3/1073	0.387512	0.606656	0.0190322	-0.00951217	TBC1D2;PCDH20;SP5
GTF2I (human)	1/237	0.391433	0.608598	0.0445662	-0.0221315	PCDH20
SMARCA2 (human)	4/1536	0.397964	0.614543	0.0937348	-0.0456372	DTWD2;T;CDHR1;GPR64
IRF8 (human)	4/1550	0.404632	0.620618	0.14608	-0.0696859	CALCR;TBX22;ARMC4;GPR64
PPARA (human)	1/271	0.433312	0.660146	0.0459024	-0.019063	GPR39
MAPK14 (human)	3/1190	0.452894	0.683477	0.111942	-0.0426009	KCNH5;GPR64;TTC39B
CACYBP (mouse)	4/1656	0.454648	0.683477	0.241033	-0.091728	SERPINE2;PMEPA1;GPR64;SP5
PPARG (human)	613822	0.472198	0.70519	0.381872	-0.133383	DKK4;CYP26A1;MYO3B;SERPINE2;CDHR1;ARMC4;NODAL;FGF4
TP53 (mouse)	3/1266	0.493922	0.722575	0.201406	-0.0654437	DKK4;MFAP4;IL17RD
POU2F2 (mouse)	4/1754	0.499755	0.722575	0.275145	-0.0894038	SLC5A9;KCNH5;GLIPR1L1;MFAP3L
RUNX2 (mouse)	4/1750	0.497941	0.722575	0.28616	-0.0929832	GPR39;SLC5A9;GLIPR1L1;IL17RD
POU1F1 (mouse)	4/1754	0.499755	0.722575	0.298127	-0.0968714	CDA;MFAP4;PCDH20;CER1
WT1 (human)	288330	0.492333	0.722575	0.347859	-0.113031	KCNH5;ZIC2;SERPINE2;KIAA1161;ARSE;TTC39B
REL (human)	1/353	0.523011	0.751415	0.120973	-0.0345738	KCNH5
TEAD4 (human)	3/1354	0.539556	0.770309	0.302675	-0.0789872	ZIC2;PMEPA1;STK32A
HNF1A (human)	4/1855	0.544623	0.772684	0.327708	-0.084511	DTWD2;CER1;MFAP3L;FGF4
STAT5B (human)	3/1379	0.552107	0.778437	0.286172	-0.0716767	MFAP4;TBX22;IL17RD
POU1F1 (human)	3/1408	0.566423	0.793692	0.307824	-0.0711258	MYCT1;CALCR;ASB5
ZNF354C (human)	3/1430	0.577104	0.802536	0.136009	-0.0299191	PCDH20;OR5P2;WNT3
TP63 (human)	3/1443	0.583341	0.802536	0.302514	-0.0665466	CDA;ARMC4;ARSE
FOXA2 (mouse)	3/1441	0.582385	0.802536	0.347166	-0.0763692	PCDH20;QPCT;SP5
RUNX2 (human)	3/1458	0.590468	0.807447	0.348944	-0.0746314	CDA;MFAP4;NODAL
En1 (mouse)	2/957	0.596429	0.810715	0.268608	-0.0563643	MFAP4;MIXL1
AHR (mouse)	1/454	0.614499	0.815129	0.233285	-0.0476854	FGF4
SOX10 (mouse)	1/451	0.612048	0.815129	0.252559	-0.0516252	KLF8
HNF4A (mouse)	1/461	0.620158	0.815129	0.29537	-0.060376	CDA
ELK1 (human)	3/1511	0.61504	0.815129	0.421071	-0.0860704	ARMC4;SP5;SLC39A8
RORB (mouse)	2/1020	0.631458	0.815129	0.445867	-0.091139	DTWD2;SLC39A8
NR2F1 (mouse)	2/1021	0.631995	0.815129	0.447279	-0.0914276	DTWD2;SLC39A8
SMAD4 (human)	3/1542	0.628964	0.815129	0.453801	-0.0927608	GPR39;CALCR;TTC39B
RBPJ (human)	3/1535	0.625849	0.815129	0.457824	-0.0935832	ZIC2;SLC6A15;CSMD1
THRB (human)	49035	0.618996	0.815129	0.466435	-0.0953432	CYP26A1;SLC39A8;ATP12A;RGS7
TEAD2 (mouse)	3/1591	0.650284	0.83398	0.499146	-0.0906177	ZIC2;PCDH10;CSMD1
TBP (mouse)	468394	0.661965	0.844192	0.671217	-0.113688	DKK4;FSTL5;MYCT1;TBX22;SLC6A15;NODAL
HIF1A (mouse)	2/1124	0.684157	0.858031	0.501403	-0.0767723	CDA;QPCT
TBX5 (mouse)	3/1663	0.680061	0.858031	0.570249	-0.0873136	ZIC2;GSC;OVCH2
STAT1 (human)	3/1667	0.681661	0.858031	0.600242	-0.091906	TRPA1;APOBEC3G;ARSE
CREB1 (human)	310213	0.688549	0.858795	0.704671	-0.107268	GPR39;TBC1D2;SP5;PMEPA1;ARSE
POU2F1 (mouse)	3/1735	0.707983	0.873436	0.617383	-0.0835447	SLC5A9;GLIPR1L1;MFAP3L
STAT5B (mouse)	3/1729	0.705727	0.873436	0.638081	-0.0863456	GPR39;T;OVCH2
USF1 (mouse)	2/1219	0.726885	0.891907	0.584108	-0.066818	MFAP4;SLC39A8
HOXA5 (human)	401889	0.761401	0.899813	0.525835	-0.0555114	LOC648987;TBC1D2;MYO3B;ASB5;NODAL
Sox5 (mouse)	1/728	0.784519	0.899813	0.53237	-0.0562012	GPR39
ARNT (human)	2/1303	0.760588	0.899813	0.554032	-0.0584881	T;GAD1
SPIB (human)	1/760	0.798748	0.899813	0.619316	-0.06538	OR52A1
TFAP2D (human)	2/1324	0.768444	0.899813	0.626293	-0.0661165	APOBEC3G;KIAA1161
MIR138 (human)	2/1356	0.779994	0.899813	0.629411	-0.0664457	CALCR;PMEPA1
SP3 (human)	2/1332	0.771379	0.899813	0.638446	-0.0673994	ZIC2;SP5
PCBP1 (human)	2/1360	0.781403	0.899813	0.653671	-0.0690067	ZIC2;SP5
CRX (human)	2/1362	0.782105	0.899813	0.693129	-0.0731723	ARSE;NODAL
IKZF1 (human)	2/1373	0.785928	0.899813	0.709986	-0.0749518	CALCR;KIAA1161
HMGA1 (human)	2/1379	0.787989	0.899813	0.719138	-0.075918	CALCR;SLC39A8
RARA (human)	2/1379	0.787989	0.899813	0.724548	-0.0764891	DKK4;MYO3B
CBFB (human)	1/774	0.804679	0.899813	0.72683	-0.07673	GPR39
NR1H3 (human)	2/1385	0.790033	0.899813	0.744387	-0.0785834	DKK4;ARMC4
NR1I2 (human)	2/1387	0.790711	0.899813	0.75404	-0.0796025	MYCT1;ARMC4
SP1 (human)	2/1406	0.797054	0.899813	0.776449	-0.0819681	ZIC2;SP5
RXRA (human)	2/1422	0.802267	0.899813	0.787824	-0.083169	KIAA1161;TTC39B
ATF4 (human)	2/1398	0.794404	0.899813	0.794154	-0.0838372	CALCR;PMEPA1
Pdx1 (mouse)	1/907	0.853108	0.939669	0.702813	-0.0437343	DKK4
HIF1A (human)	2/1586	0.849317	0.939669	0.82615	-0.0514092	ARMC4;ATP12A
ZNF281 (human)	1/986	0.876062	0.939669	0.863263	-0.0537186	KLF8
NR3C1 (human)	2/1590	0.850329	0.939669	0.879768	-0.0547457	CDA;GAD1
EGR1 (mouse)	2/1617	0.857002	0.939669	0.947498	-0.0589604	GSC;MFAP3L
NRF1 (mouse)	2/1676	0.870667	0.939669	0.9592	-0.0596885	FSTL5;FGF4
MYC (mouse)	2/1699	0.875667	0.939669	0.968139	-0.0602448	SLC6A15;FGF4
MYOG (mouse)	2/1675	0.870445	0.939669	0.988689	-0.0615236	FGF17;DKK4
FOS (mouse)	2/1708	0.877576	0.939669	1.00179	-0.062339	CDHR1;CSMD1
NR5A2 (mouse)	2/1748	0.885745	0.941427	0.991237	-0.0598301	MFAP4;FGF4
SRF (mouse)	2/1782	0.892296	0.941427	1.00429	-0.0606181	DKK4;TBX22
Stat3 (mouse)	2/1762	0.888485	0.941427	1.03265	-0.0623297	FSTL5;TNS4
NFATC3 (mouse)	2/1801	0.895807	0.941427	1.04459	-0.0630502	SLC6A15;MIXL1
APEX1 (human)	1/1373	0.946476	0.973481	1.00043	-0.0268882	NODAL
NRF1 (human)	1/1356	0.944451	0.973481	1.00989	-0.0271425	KCNH5
GFI1 (human)	1/1427	0.95244	0.973481	1.02444	-0.0275335	ARSE
FOXF2 (human)	1/1379	0.947173	0.973481	1.04925	-0.0282004	ARSE
FOXJ1 (human)	1/1484	0.958026	0.973481	1.05765	-0.028426	APOBEC3G
CEBPD (human)	1/1495	0.959028	0.973481	1.07661	-0.0289358	CDA
ZFHX3 (human)	1/1504	0.95983	0.973481	1.09369	-0.0293949	TRPA1
ESR1 (human)	1/1513	0.960616	0.973481	1.1219	-0.0301529	TTC39B
NR3C1 (mouse)	1/1775	0.977916	0.977916	1.13795	-0.0254126	MFAP3L
JUN (mouse)	1/1699	0.973865	0.977916	1.18455	-0.0264532	PMEPA1
YY1 (mouse)	1/1700	0.973923	0.977916	1.20315	-0.0268687	WNT3

## Sheet: Cluster 5
Term	Overlap	P-value	Adjusted P-value	Z-score	Combined Score	Genes
HMGA1 (human)	11/1379	0.000251193	0.0162577	-1.73876	7.16227	MEIS1;LRRN4;HOXB2;ESRRG;LRP2;PGA3;FREM1;MEIS2;PGA5;GRIA3;PGA4
TEAD1 (human)	12/1547	0.000163881	0.0162577	-1.73669	7.15375	TMEM88;HAND1;IGF2;RARB;SCN7A;ELTD1;ESRRG;NCAM1;PGA3;TFPI;PGA5;PGA4
TBX5 (mouse)	13/1663	7.73789e-05	0.0162577	-1.6946	6.98039	PDGFRA;PCDH7;LRRN4;ESRRG;ELTD1;TFPI;ZEB1;HEY1;BMPER;HAND1;RARB;HOXB2;FREM1
BCL6 (human)	11/1399	0.000283977	0.0162577	-1.65981	6.83707	ZEB2;ADAM28;BMP10;TMEM88;CDH10;PLCE1;SCN7A;ESRRG;SYTL5;TFPI;AMOT
TEAD2 (mouse)	11/1591	0.000829678	0.0379992	-1.68304	5.50387	PDGFRA;NRP1;ZEB1;TMEM88;PCDH7;IGF2;HOXB2;CCDC92;MEIS2;FGF10;CNTNAP4
NKX2-8 (human)	4/256	0.00283577	0.0928081	-1.83219	4.35553	BMP10;HAND1;FREM1;GRIA3
TCFAP2A (human)	9/1367	0.00356346	0.0928081	-1.67454	3.98075	FBN2;PRTG;NRP1;ZEB1;HEY1;TMEM88;IGF2;GREB1L;CCDC92
E2F6 (human)	9/1358	0.00341229	0.0928081	-1.64192	3.90321	NRP1;HEY1;SEMA6D;IGF2;PLCE1;LRP2;CCDC92;NID2;MEIS2
REPIN1 (human)	9/1466	0.00560159	0.0928081	-1.6252	3.86346	PRTG;MEIS1;ZEB1;BMPER;ESRRG;LRP2;CCDC92;NID2;CNTNAP4
TFAP2A (human)	16/3613	0.00567386	0.0928081	-1.60923	3.82549	FBN2;NRP1;LRRN4;IGF2;GREB1L;ESRRG;LRP2;MEIS2;HAPLN1;PRTG;H19;MEIS1;ZEB1;HEY1;TMEM88;CCDC92
PRDM1 (human)	9/1468	0.00565052	0.0928081	-1.58565	3.76944	PPP1R3C;HEY1;LIX1;MYOF;RARB;ALPK2;SYTL5;FREM1;ISL1
SPI1 (mouse)	10/1680	0.00431803	0.0928081	-1.56558	3.72174	NRP1;ZEB2;ZEB1;SEMA6D;LRRN4;LRP2;MEIS2;LRRC63;FGF10;CNTNAP4
CBEPB (human)	13/2598	0.00490586	0.0928081	-1.53043	3.63818	CFC1B;BMP10;ELTD1;ESRRG;SYTL5;CFC1;ZEB2;RARB;SCN7A;NCAM1;ALPK2;FREM1;CBLN2
CBEPB (mouse)	15/3275	0.00555073	0.0928081	-1.46485	3.48228	PDGFRA;IGFBP5;IGF2;GREB1L;RHOBTB3;ESRRG;TFPI;CFC1;ADAM28;PPP1R3C;LIX1;HAND1;PLCE1;SCN7A;FGF10
Nobox (mouse)	3/201	0.0110383	0.133041	-1.76669	3.56359	PDGFRA;SVEP1;TFPI
SP3 (human)	8/1332	0.0101928	0.133041	-1.57066	3.16817	NRP1;ZEB1;HEY1;TMEM88;IGF2;GATA3;CCDC92;AMOT
NFKB1 (human)	15/3497	0.0100402	0.133041	-1.41626	2.85673	FBN2;PDGFRA;PCDH7;LRRN4;IGF2;MICAL2;TFPI;TMEM88;HAND1;FAM198B;HOXB2;ALPK2;CCDC92;FREM1;CNTNAP4
E2F1 (human)	17/4207	0.0105813	0.133041	-1.36093	2.74513	NRP1;SEMA6D;LRRN4;IGF2;SLC40A1;ESRRG;GATA3;PGA3;MEIS2;PGA5;HAPLN1;PGA4;ZEB1;HEY1;TMEM88;CCDC92;ADAMTS9
TCF4 (human)	17/4210	0.0106542	0.133041	-1.29971	2.62165	BMP10;SEMA6D;LRRN4;ELTD1;ESRRG;PGA3;ISL1;MEIS2;HAPLN1;ZEB2;FAM198B;HAND1;HOXB2;SVEP1;NCAM1;GRIA3;CNTNAP4
FOXL1 (human)	21/5755	0.0129845	0.138744	-1.61534	3.1905	FBN2;RHOBTB3;ELTD1;UNC5C;GATA3;C4ORF31;ISL1;HAPLN1;PRTG;ZEB1;BMPER;LIX1;CDH10;FAM198B;NCAM1;HOXB2;ALPK2;ATP6V0D2;FREM1;CBLN2;CNTNAP4
Nkx3-2 (mouse)	7/1122	0.0133291	0.138744	-1.58891	3.13829	PRTG;LIX1;TMEM88;NCAM1;ELTD1;GATA3;NID2
ETS1 (mouse)	9/1681	0.0130815	0.138744	-1.40149	2.76812	FBN2;PPP1R3C;TBX20;FAM198B;IGF2;SCN7A;MICAL2;NCAM1;CBLN2
SOX10 (mouse)	4/451	0.0194252	0.158871	-1.53293	2.82009	ADAM28;ZEB2;IGF2;TFPI
EGR1 (human)	5/681	0.0191814	0.158871	-1.50384	2.76656	BMPER;GREB1L;IGF2;ESRRG;CCDC92
TEAD2 (human)	8/1486	0.0186018	0.158871	-1.42283	2.61753	FBN2;ZEB1;SEMA6D;PCDH7;GREB1L;ESRRG;GATA3;LRP2
JUND (mouse)	9/1764	0.0174118	0.158871	-1.40861	2.59137	ADAM28;BMP10;ZEB1;SEMA6D;HAND1;FAM198B;SVEP1;ADAMTS9;FGF10
HINFP (human)	13/3047	0.0175613	0.158871	-1.31031	2.41052	FBN2;IGFBP5;SEMA6D;IGF2;ESRRG;SYTL5;ISL1;MEIS1;CDH10;FAM198B;CCDC92;FREM1;CNTNAP4
E2F1 (mouse)	13/3056	0.0179578	0.158871	-1.28366	2.36151	PDGFRA;SLC40A1;MICAL2;UNC5C;ELTD1;LRP2;MEIS2;HAPLN1;MEIS1;FAM198B;SVEP1;HOXB2;CCDC92
En1 (mouse)	6/957	0.0211728	0.161619	-1.47956	2.69651	MEIS1;HAND1;NCAM1;ELTD1;MEIS2;GRIA3
ATF2 (human)	8/1517	0.0207687	0.161619	-1.3777	2.51087	NRP1;SEMA6D;MYOF;PLCE1;NCAM1;SYTL5;MEIS2;CFC1
SMAD4 (human)	8/1542	0.0226439	0.167273	-1.39487	2.49421	ADAM28;FAM198B;UNC5C;HOXB2;ALPK2;C4ORF31;MEIS2;HAPLN1
THRA (human)	3/271	0.0240378	0.172021	-1.48699	2.6173	ZEB2;RHOBTB3;RARB
PURA (human)	4/492	0.0256637	0.178091	-1.47208	2.54002	ZEB1;HEY1;ESRRG;AMOT
Nkx2-5 (mouse)	4/515	0.029637	0.199614	-1.4812	2.38677	ELTD1;TFPI;NID2;FGF10
PCBP1 (human)	7/1360	0.0336799	0.207404	-1.31535	2.06916	PRTG;ZEB1;HEY1;IGF2;GATA3;CCDC92;AMOT
AHR (human)	7/1391	0.0373464	0.207404	-1.2786	2.01136	ZEB1;PCDH7;SEMA6D;SVEP1;ESRRG;LRP2;CCDC92
NFAT2 (human)	7/1376	0.0355405	0.207404	-1.27197	2.00092	ADAM28;HOXB2;ESRRG;NCAM1;GATA3;FREM1;MEIS2
TFAP2A (mouse)	8/1663	0.033449	0.207404	-1.25143	1.96861	PDGFRA;TMEM88;TBX20;IGF2;LRP2;NID2;MEIS2;GRIA3
SP1 (human)	7/1406	0.0392126	0.207404	-1.24049	1.9514	ZEB1;HEY1;TMEM88;IGF2;GATA3;CCDC92;AMOT
MYOG (mouse)	8/1675	0.0346856	0.207404	-1.23207	1.93816	NRP1;MEIS1;ADAM28;MICAL2;UNC5C;GRIA3;CFC1;CBLN2
POU1F1 (human)	7/1408	0.039466	0.207404	-1.20978	1.9031	ZEB1;CDH10;RHOBTB3;ESRRG;ATP6V0D2;FREM1;CNTNAP4
IRF2 (mouse)	8/1706	0.0380249	0.207404	-1.16624	1.8346	TMEM88;CDH10;FAM198B;RHOBTB3;PLCE1;ATP6V0D2;MEIS2;FGF10
GATA1 (human)	2679-11-01	0.0368186	0.207404	-1.16194	1.82783	BMP10;PPP1R3C;FAM198B;SCN7A;ESRRG;GATA3;SYTL5;NID2;FREM1;ISL1;ATP6V0D2
LEF1 (mouse)	8/1730	0.0407562	0.207404	-1.1131	1.75101	FBN2;BMPER;PCDH7;RARB;PLCE1;NCAM1;ELTD1;HOXB2
SRF (human)	13/3420	0.040543	0.207404	-1.04411	1.64247	FBN2;BMP10;PCDH7;LRRN4;IGF2;ELTD1;LRP2;PGA3;ZEB2;RARB;SCN7A;FREM1;ADAMTS9
MTF1 (human)	7/1440	0.0436692	0.217397	-1.2023	1.83475	MEIS1;BMPER;SEMA6D;IGF2;UNC5C;LRP2;CCDC92
PGR (human)	7/1447	0.0446263	0.217434	-1.15404	1.7609	LRRN4;FAM198B;PLCE1;UNC5C;SVEP1;ALPK2;SYTL5
MEF2A (human)	2800-11-01	0.0482404	0.230147	-1.03137	1.51512	CFC1B;ZEB2;IGFBP5;TMEM88;RHOBTB3;ESRRG;NCAM1;SYTL5;C4ORF31;ISL1;AMOT
Pdx1 (mouse)	5/907	0.0545555	0.25379	-1.30819	1.79385	PDGFRA;HAND1;SVEP1;ELTD1;TFPI
TP53 (human)	2866-11-01	0.0554128	0.25379	-0.989668	1.35708	ZEB1;HAND1;LRRN4;MYOF;IGF2;SYTL5;TFPI;FREM1;MEIS2;PGA4;CNTNAP4
Gata1 (mouse)	8/1863	0.0582979	0.261769	-1.02388	1.37231	ZEB2;ZEB1;IGFBP5;LRRN4;SCN7A;RARB;LRP2;HAPLN1
NFKB1 (mouse)	3284-12-01	0.0624666	0.275093	-0.884565	1.14166	PDGFRA;MEIS1;IGFBP5;TMEM88;IGF2;RARB;PLCE1;HOXB2;NID2;GRIA3;LRRC63;CNTNAP4
Myb (mouse)	1902-08-01	0.064241	0.27757	-1.04188	1.33536	NRP1;HEY1;UNC5C;HOXB2;CCDC92;NID2;FREM1;AMOT
FOXC1 (human)	36/13142	0.0717008	0.30042	-1.14153	1.37278	FBN2;RHOBTB3;GREB1L;NID2;HAPLN1;PRTG;ADAM28;BMPER;TMEM88;TBX20;FAM198B;SCN7A;PLCE1;SVEP1;NCAM1;CCDC92;ADAMTS9;GRIA3;CFC1B;IGFBP5;PCDH7;MYOF;IGF2;SYTL5;PGA3;MEIS2;ISL1;PGA5;ZEB1;HAND1;RARB;HOXB2;ALPK2;ATP6V0D2;FREM1;CNTNAP4
EGR1 (mouse)	7/1617	0.0721533	0.30042	-1.0119	1.21688	FBN2;PDGFRA;MEIS1;SEMA6D;IGF2;LRP2;CCDC92
RORB (human)	5/1035	0.084988	0.327577	-1.11483	1.24419	ZEB2;PPP1R3C;RHOBTB3;RARB;FREM1
ZNF354C (human)	6/1430	0.103984	0.327577	-1.08177	1.20729	H19;ZEB1;HAND1;ESRRG;PGA5;PGA4
NR2F1 (human)	5/1073	0.0954682	0.327577	-1.02857	1.14792	ZEB2;PPP1R3C;RHOBTB3;RARB;FREM1
CBEPA (human)	6/1366	0.0881632	0.327577	-1.01692	1.13491	PCDH7;IGF2;LRP2;ADAMTS9;MEIS2;GRIA3
TEAD4 (human)	6/1354	0.0853576	0.327577	-1.00727	1.12415	HEY1;IGF2;GATA3;CCDC92;MEIS2;GRIA3
ZBTB7A (human)	6/1373	0.0898234	0.327577	-0.974392	1.08745	FBN2;ZEB1;SEMA6D;IGF2;PLCE1;CCDC92
MZF1 (human)	6/1389	0.0936832	0.327577	-0.95795	1.0691	NRP1;ZEB1;SEMA6D;LRRN4;IGF2;MEIS2
GATA2 (human)	28/9985	0.0986062	0.327577	-0.912462	1.01834	FBN2;ELTD1;TFPI;NID2;C4ORF31;AMOT;BMPER;HEY1;FAM198B;NCAM1;CCDC92;GRIA3;PDGFRA;CFC1B;IGFBP5;SEMA6D;PCDH7;SYTL5;MEIS2;H19;PPP1R3C;LIX1;CDH10;RARB;ATP6V0D2;FREM1;CBLN2;CNTNAP4
MYB (human)	6/1409	0.0986345	0.327577	-0.902444	1.00716	ADAM28;BMP10;ELTD1;SYTL5;FREM1;MEIS2
SREBF1 (mouse)	7/1735	0.096211	0.327577	-0.901637	1.00625	ZEB2;BMP10;PPP1R3C;HEY1;RHOBTB3;MICAL2;GRIA3
RBPJ (mouse)	7/1735	0.096211	0.327577	-0.85126	0.950032	ZEB1;IGFBP5;HEY1;FAM198B;SVEP1;HOXB2;LRRC63
POU2F2 (mouse)	7/1754	0.100464	0.327577	-0.82299	0.918482	PRTG;BMP10;PCDH7;FAM198B;SVEP1;ELTD1;FREM1
NR3C1 (mouse)	7/1775	0.105286	0.327577	-0.786523	0.877784	SLC40A1;NCAM1;SYTL5;MEIS2;ISL1;PGA5;AMOT
IRF8 (mouse)	7/1770	0.104127	0.327577	-0.777814	0.868064	PRTG;BMPER;MYOF;TBX20;GREB1L;SVEP1;LRRC63
ETV4 (mouse)	7/1773	0.104821	0.327577	-0.759158	0.847244	PDGFRA;ZEB2;PLCE1;NCAM1;ISL1;FGF10;CNTNAP4
HNF4A (human)	2127-08-01	0.105855	0.327577	-0.755038	0.842646	CFC1B;PPP1R3C;SEMA6D;MYOF;RARB;ALPK2;GRIA3;CFC1
LEF1 (human)	15/4658	0.0938419	0.327577	-0.687067	0.766788	FBN2;PCDH7;SEMA6D;ELTD1;SYTL5;TFPI;ISL1;AMOT;ZEB2;FAM198B;PLCE1;SVEP1;NCAM1;CCDC92;CNTNAP4
CBX5 (human)	1940-01-01	0.088438	0.327577	-0.149373	0.166705	GREB1L
SP4 (human)	1942-01-01	0.0925492	0.327577	-0.119344	0.133192	HAND1
GATA6 (human)	6/1447	0.108425	0.330367	-0.797467	0.883235	ADAM28;BMP10;ZEB1;LRRN4;ALPK2;ISL1
FOXA1 (human)	6/1457	0.111084	0.330367	-0.79316	0.878464	TMEM88;SEMA6D;SCN7A;TFPI;FREM1;CNTNAP4
KLF13 (human)	6/1453	0.110017	0.330367	-0.774791	0.85812	IGF2;SLC40A1;ESRRG;HAPLN1;AMOT;CNTNAP4
RELB (human)	6/1469	0.11432	0.334444	-0.754827	0.826751	TMEM88;HAND1;MYOF;ESRRG;ALPK2;ADAMTS9
SND1 (human)	6/1473	0.115409	0.334444	-0.717307	0.785655	PCDH7;LRRN4;IGF2;ALPK2;FREM1;CNTNAP4
HLF (human)	1954-01-01	0.116836	0.334444	-0.27215	0.298081	RARB
ELK1 (human)	6/1511	0.126023	0.356288	-0.730449	0.753835	ZEB2;LRRN4;MICAL2;GATA3;FREM1;MEIS2
JUN (human)	2976-10-01	0.130887	0.365526	-0.580658	0.584385	BMP10;BMPER;IGF2;PLCE1;RARB;MICAL2;SVEP1;GATA3;SYTL5;AMOT
IRF8 (human)	6/1550	0.137407	0.37911	-0.687269	0.666603	ZEB1;PCDH7;RHOBTB3;FREM1;ISL1;MEIS2
SMAD4 (mouse)	6/1580	0.14649	0.395761	-0.63002	0.583994	SEMA6D;IGF2;RHOBTB3;MICAL2;CCDC92;MEIS2
NFE2 (human)	2681-09-01	0.148626	0.395761	-0.538878	0.49951	ZEB1;TMEM88;IGF2;SLC40A1;GATA3;NID2;HAPLN1;PGA5;CNTNAP4
MIR210 (human)	1970-01-01	0.148227	0.395761	-0.132268	0.122606	MEIS2
SP1 (mouse)	2360-08-01	0.161876	0.426087	-0.54031	0.460945	FBN2;IGFBP5;HEY1;TMEM88;TBX20;IGF2;CCDC92;LRRC63
NCOA1 (human)	1979-01-01	0.165398	0.430412	-0.204878	0.172715	GATA3
ARNT (human)	5/1303	0.171726	0.436948	-0.67211	0.556467	MEIS1;ZEB1;IGF2;LRP2;MEIS2
RELA (mouse)	6/1656	0.170708	0.436948	-0.550875	0.456092	PDGFRA;ZEB2;MEIS1;ISL1;CBLN2;CNTNAP4
STAT1 (human)	6/1667	0.17435	0.437244	-0.556008	0.459966	NRP1;FAM198B;SYTL5;MEIS2;GRIA3;AMOT
POU2F2 (human)	2792-09-01	0.176209	0.437244	-0.475431	0.393307	ZEB2;TMEM88;RARB;SVEP1;SYTL5;ATP6V0D2;FREM1;CFC1;CNTNAP4
TBP (mouse)	3182-10-01	0.177571	0.437244	-0.393741	0.325728	PDGFRA;ADAM28;ZEB2;LIX1;CDH10;MYOF;ESRRG;SVEP1;SYTL5;FGF10
FOXA1 (mouse)	6/1705	0.187182	0.446507	-0.52666	0.424646	SEMA6D;SCN7A;ESRRG;NID2;ISL1;CBLN2
YY1 (mouse)	6/1700	0.185472	0.446507	-0.474445	0.382545	FBN2;IGF2;RHOBTB3;UNC5C;CCDC92;FREM1
HNF1B (human)	1990-01-01	0.185924	0.446507	-0.192936	0.155565	LIX1
POU2F1 (mouse)	6/1735	0.197577	0.466444	-0.481581	0.367263	ZEB2;BMP10;FAM198B;SVEP1;ELTD1;FREM1
NR5A1 (human)	5/1389	0.205091	0.474403	-0.485876	0.362316	ZEB1;PLCE1;RARB;MEIS2;GRIA3
POU1F1 (mouse)	6/1754	0.204274	0.474403	-0.454107	0.338626	BMP10;HEY1;CCDC92;ISL1;CFC1;CNTNAP4
SOX9 (human)	1/105	0.213115	0.488033	-0.314141	0.225356	ISL1
SAMD9L (human)	5/1415	0.215598	0.488832	-0.487423	0.348866	HOXB2;SVEP1;ESRRG;ALPK2;ATP6V0D2
NFATC3 (mouse)	6/1801	0.221203	0.496622	-0.38357	0.268471	PPP1R3C;IGF2;RARB;NCAM1;SVEP1;ADAMTS9
BRCA1 (human)	6/1809	0.224133	0.49825	-0.6134	0.427327	PCDH7;FAM198B;SCN7A;MEIS2;CBLN2;PGA4
USF1 (human)	5/1441	0.226279	0.49825	-0.459598	0.320181	CFC1B;SEMA6D;MICAL2;LRP2;CFC1
Prrx2 (mouse)	2205-07-01	0.22935	0.500201	-0.478792	0.331681	PDGFRA;SVEP1;ELTD1;CCDC92;TFPI;CBLN2;FGF10
RUNX2 (human)	5/1458	0.233352	0.504127	-0.423494	0.290062	ADAM28;SEMA6D;PLCE1;ATP6V0D2;ISL1
HNF1A (human)	6/1855	0.241235	0.516287	-0.352312	0.232911	PCDH7;MYOF;IGF2;RHOBTB3;PLCE1;LRP2
MIR133B (human)	5/1500	0.251099	0.516903	-0.367829	0.24273	IGF2;RARB;NID2;ISL1;ADAMTS9
SP3 (mouse)	4/1129	0.251876	0.516903	-0.354065	0.233647	PDGFRA;PCDH7;IGF2;CCDC92
ZFHX3 (human)	5/1504	0.252809	0.516903	-0.342028	0.225704	CFC1B;PLCE1;SYTL5;ATP6V0D2;CFC1
RUNX1 (human)	3857-11-01	0.249619	0.516903	-0.194547	0.128381	CFC1B;ZEB2;FAM198B;MYOF;IGF2;RARB;ESRRG;GATA3;PGA3;GRIA3;CFC1
CEBPE (human)	1/127	0.251385	0.516903	-0.178307	0.117665	ADAM28
FOXO3 (human)	1/132	0.259824	0.526547	-0.208649	0.133831	ISL1
MZF1_1-4 (human)	2705-08-01	0.265335	0.532997	-0.456253	0.287092	MEIS1;ZEB1;LRRN4;IGF2;SLC40A1;ELTD1;ESRRG;CFC1
NFIC (human)	4403-12-01	0.286764	0.556518	-0.214188	0.125526	ZEB2;HEY1;SEMA6D;IGF2;RARB;PLCE1;ESRRG;PGA3;FREM1;MEIS2;GRIA3;CNTNAP4
YY1 (human)	16/6042	0.279736	0.556518	-0.210544	0.123391	IGFBP5;LRRN4;RHOBTB3;IGF2;ESRRG;TFPI;SYTL5;ISL1;AMOT;CDH10;FAM198B;RARB;ALPK2;CCDC92;FREM1;CNTNAP4
STAT3 (human)	2759-08-01	0.283228	0.556518	-0.134135	0.078611	NRP1;TMEM88;CDH10;FAM198B;IGF2;UNC5C;FREM1;CNTNAP4
PPARG (human)	3580-10-01	0.286502	0.556518	-0.0793579	0.0465082	NRP1;CDH10;PLCE1;NCAM1;ALPK2;PGA3;PGA5;CFC1;PGA4;CNTNAP4
Sox17 (mouse)	2/500	0.313014	0.602355	-0.419511	0.212653	FAM198B;UNC5C
FEV (human)	1/172	0.32405	0.618395	-0.293644	0.141133	PRTG
MYC (mouse)	5/1699	0.339081	0.641732	-0.157645	0.0699289	PRTG;BMP10;PPP1R3C;LRP2;TFPI
FOXD1 (human)	1/192	0.354073	0.664613	-0.281194	0.114882	ISL1
NFYA (mouse)	5/1748	0.361329	0.667293	-0.158119	0.0639632	ZEB2;BMP10;HEY1;MICAL2;ISL1
ETS2 (human)	4/1341	0.360064	0.667293	-0.139636	0.0564863	ZEB1;PGA3;PGA5;PGA4
Arnt::Ahr (mouse)	1/207	0.375726	0.679404	-0.227313	0.0878654	IGF2
APEX1 (human)	4/1373	0.376647	0.679404	-0.183544	0.0709469	LIX1;PLCE1;SYTL5;ATP6V0D2
STAT5B (human)	4/1379	0.379754	0.679404	-0.134857	0.0521274	NRP1;FAM198B;SYTL5;HAPLN1
SRF (mouse)	5/1782	0.376814	0.679404	-0.0877858	0.0339327	ADAM28;ESRRG;SVEP1;ADAMTS9;CFC1
FOXI1 (human)	1/217	0.389763	0.690828	-0.213993	0.0791484	BMPER
ETV4 (human)	4/1403	0.392173	0.690828	-0.0862051	0.0318842	NRP1;ESRRG;MEIS2;AMOT
NR5A1 (mouse)	3/1020	0.407163	0.706366	-0.116092	0.0403561	HOXB2;ESRRG;PGA5
WT1 (human)	2689-07-01	0.406652	0.706366	0.06289	-0.0218619	PRTG;ZEB1;HEY1;IGF2;PLCE1;CCDC92;MEIS2
ELK4 (human)	4/1453	0.417946	0.719621	-0.0736681	0.0242391	BMPER;NCAM1;ISL1;AMOT
LOC135440 (human)	1/247	0.430035	0.73491	-0.0917475	0.0282589	RHOBTB3
UBTF (human)	4/1493	0.438413	0.73821	-0.0246149	0.00747129	ZEB1;HAND1;LRP2;MEIS2
MIB2 (human)	4/1490	0.436884	0.73821	0.0239783	-0.00727806	ALPK2;ADAMTS9;CFC1;AMOT
CRTC1 (human)	3/1086	0.447022	0.741797	-0.0261356	0.00780619	ADAM28;IGFBP5;ATP6V0D2
MAX (human)	1934-05-01	0.445854	0.741797	0.00507924	-0.00151707	NRP1;HEY1;SEMA6D;MICAL2;LRP2
NKX3-1 (human)	1/264	0.451683	0.744139	-0.117567	0.0347441	PLCE1
E2F4 (human)	1/270	0.459128	0.747429	-0.0862034	0.0250951	SLC40A1
SMARCA2 (human)	4/1536	0.460208	0.747429	0.0153612	-0.00447189	CFC1B;HEY1;TFPI;MEIS2
Sox5 (mouse)	2/728	0.492614	0.788872	-0.0985175	0.0233636	BMPER;CCDC92
USF2 (human)	3792-09-01	0.492025	0.788872	0.273205	-0.0647909	ZEB1;SEMA6D;MICAL2;SCN7A;PLCE1;ELTD1;LRP2;PGA3;PGA5
TBP (human)	2486-06-01	0.496115	0.78896	0.231623	-0.0549037	LIX1;RHOBTB3;RARB;ESRRG;NCAM1;CNTNAP4
MZF1_5-13 (human)	1/316	0.512999	0.799468	-0.108361	0.0242522	SLC40A1
SPIB (human)	2/760	0.51555	0.799468	-0.0876582	0.0196187	ZEB2;PPP1R3C
MAPK14 (human)	3/1190	0.507639	0.799468	0.0485431	-0.0108644	RARB;PLCE1;SYTL5
CBFB (human)	2/774	0.525374	0.799468	0.0487041	-0.0109004	NRP1;ESRRG
CACYBP (mouse)	4/1656	0.519469	0.799468	0.203602	-0.0455679	MEIS1;HAND1;ESRRG;HAPLN1
MYOD1 (mouse)	4/1672	0.52716	0.799468	0.22868	-0.0511807	LIX1;GREB1L;RHOBTB3;ATP6V0D2
NFYA (human)	2549-06-01	0.521197	0.799468	0.239045	-0.0535005	ZEB2;IGF2;RARB;ESRRG;GATA3;PGA3
REL (human)	1/353	0.552467	0.800643	0.0806536	-0.0179325	PCDH7
ETS1 (human)	4827-11-01	0.539459	0.800643	0.237234	-0.0527467	FBN2;PRTG;ZEB2;LIX1;SEMA6D;RHOBTB3;GATA3;CCDC92;C4ORF31;FREM1;AMOT
CPEB1 (mouse)	4/1748	0.562898	0.800643	0.27065	-0.0601764	ZEB2;BMP10;HEY1;MICAL2
JUN (mouse)	4/1699	0.540011	0.800643	0.277252	-0.0616442	MEIS1;PPP1R3C;PLCE1;TFPI
NFYB (mouse)	4/1748	0.562898	0.800643	0.295006	-0.0655917	ZEB2;BMP10;HEY1;MICAL2
SREBF1 (human)	2587-06-01	0.536112	0.800643	0.296477	-0.0659187	LIX1;IGF2;RARB;LRP2;CCDC92;FREM1
ELK1 (mouse)	4/1727	0.55316	0.800643	0.302025	-0.0671523	MEIS1;BMP10;HAND1;PLCE1
STAT5B (mouse)	4/1729	0.554092	0.800643	0.309603	-0.0688372	PRTG;NRP1;SEMA6D;TFPI
HMGA1 (mouse)	4/1748	0.562898	0.800643	0.319839	-0.071113	PPP1R3C;IGF2;SVEP1;FREM1
NR5A2 (mouse)	4/1748	0.562898	0.800643	0.332576	-0.0739449	PDGFRA;HAND1;FREM1;PGA5
MYC (human)	3/1302	0.569035	0.801139	0.286504	-0.0635238	SEMA6D;MICAL2;LRP2
CBEPA (mouse)	4/1764	0.570243	0.801139	0.342298	-0.0758944	BMP10;BMPER;LIX1;NCAM1
CREB1 (mouse)	2/849	0.57574	0.803929	0.269303	-0.0587738	ZEB2;PCDH7
TFAP2D (human)	3/1324	0.580554	0.805739	0.332332	-0.0717824	CFC1B;ALPK2;CFC1
ARID3A (mouse)	4/1893	0.626978	0.836866	0.339267	-0.0604204	ELTD1;CCDC92;GRIA3;HAPLN1
FOS (human)	3/1394	0.61594	0.836866	0.366382	-0.0652493	ADAM28;BMP10;ATP6V0D2
KLF11 (human)	3/1388	0.612984	0.836866	0.382631	-0.0681432	NRP1;TMEM88;IGF2
IRF2 (human)	3/1412	0.624719	0.836866	0.402204	-0.071629	PRTG;LIX1;ELTD1
TCF3 (human)	3/1428	0.632411	0.836866	0.402383	-0.0716608	SCN7A;PGA3;PGA5
SNAI1 (human)	3/1428	0.632411	0.836866	0.415077	-0.0739216	SCN7A;PGA3;PGA5
SNAI2 (human)	3/1428	0.632411	0.836866	0.428562	-0.076323	SCN7A;PGA3;PGA5
TP63 (human)	3/1443	0.639527	0.836866	0.42941	-0.0764741	LIX1;PLCE1;SYTL5
FOXA2 (mouse)	3/1441	0.638583	0.836866	0.472833	-0.0842074	PPP1R3C;ALPK2;FREM1
RELA (human)	2775-06-01	0.60697	0.836866	0.497036	-0.0885177	HAND1;LRRN4;IGF2;PLCE1;HOXB2;CNTNAP4
SRY (human)	1/469	0.656893	0.839413	0.258635	-0.0452747	ELTD1
ZNF281 (human)	2/986	0.657642	0.839413	0.425227	-0.0744371	HEY1;GATA3
JDP2 (human)	3/1488	0.660309	0.839413	0.520589	-0.0911304	SEMA6D;LRP2;FREM1
CEBPD (human)	3/1495	0.663466	0.839413	0.550567	-0.0963781	NCAM1;FREM1;CFC1
KLF4 (human)	3/1485	0.65895	0.839413	0.552889	-0.0967847	NRP1;TMEM88;IGF2
ELF3 (human)	3/1488	0.660309	0.839413	0.574267	-0.100527	LRRN4;IGF2;TFPI
Pax2 (mouse)	3/1516	0.672812	0.83955	0.458774	-0.0802345	SLC40A1;UNC5C;NID2
RXRA (mouse)	1/507	0.685572	0.83955	0.470419	-0.082271	FGF10
CRTC3 (human)	2/1008	0.669578	0.83955	0.470868	-0.0823495	ATP6V0D2;FREM1
RBPJ (human)	3/1535	0.681109	0.83955	0.61413	-0.107404	SYTL5;ISL1;GRIA3
HOXD9 (human)	3/1543	0.684556	0.83955	0.641608	-0.11221	SEMA6D;ALPK2;GATA3
GATA3 (human)	2505-05-01	0.678531	0.83955	0.646384	-0.113045	PPP1R3C;FREM1;ATP6V0D2;AMOT;CNTNAP4
ZBTB16 (human)	3/1572	0.696828	0.848796	0.639453	-0.10483	ADAM28;PLCE1;ALPK2
NR3C1 (human)	3/1590	0.704268	0.849321	0.679147	-0.110917	PLCE1;C4ORF31;FREM1
ZNF148 (human)	3/1591	0.704677	0.849321	0.693363	-0.113239	NRP1;HEY1;TMEM88
ELF5 (mouse)	1/556	0.719093	0.862159	0.474172	-0.0703273	TFPI
HIF1A (mouse)	2/1124	0.727139	0.862772	0.653904	-0.0965197	PDGFRA;FREM1
SPI1 (human)	3/1638	0.723444	0.862772	0.66066	-0.0975169	NCAM1;SYTL5;TFPI
NRF1 (mouse)	3/1676	0.737947	0.871082	0.770002	-0.106275	PPP1R3C;CCDC92;PGA5
XBP1 (human)	1/605	0.749091	0.871481	0.570243	-0.0784433	PLCE1
FOXO3A (mouse)	1/597	0.744418	0.871481	0.593884	-0.0816954	ELTD1
FOS (mouse)	3/1708	0.749702	0.871481	0.813113	-0.111853	MYOF;PLCE1;MICAL2
CREB1 (human)	2749-05-01	0.756385	0.874809	0.91214	-0.121998	PCDH7;IGF2;PLCE1;UNC5C;CNTNAP4
USF1 (mouse)	2/1219	0.767879	0.879222	0.77206	-0.099378	PDGFRA;LRP2
REL (mouse)	3/1752	0.76519	0.879222	0.835154	-0.107499	TMEM88;IGF2;MEIS2
HOXA5 (human)	3000-05-01	0.821314	0.910765	0.760697	-0.0711026	NID2;ATP6V0D2;HAPLN1;AMOT;CNTNAP4
MIR138 (human)	2/1356	0.817442	0.910765	0.781412	-0.0730388	TMEM88;PCDH7
FOXF1 (human)	2/1352	0.816137	0.910765	0.787926	-0.0736477	SYTL5;ATP6V0D2
NRF1 (human)	2/1356	0.817442	0.910765	0.831444	-0.0777154	LRP2;CCDC92
SREBF2 (human)	2/1361	0.819062	0.910765	0.845512	-0.0790302	PLCE1;HOXB2
JUND (human)	2/1380	0.825102	0.910765	0.863777	-0.0807375	PLCE1;CBLN2
FOXF2 (human)	2/1379	0.824789	0.910765	0.87887	-0.0821482	CFC1B;CFC1
POU2F1 (human)	2/1399	0.830964	0.910765	0.89536	-0.0836896	SYTL5;FREM1
NFIA (human)	2/1416	0.836061	0.910765	0.906992	-0.0847769	SVEP1;FREM1
KLF5 (human)	2/1445	0.844444	0.910765	0.924339	-0.0863983	HEY1;MEIS2
MYOG (human)	2/1404	0.832478	0.910765	0.927964	-0.0867371	LRP2;MEIS2
PITX1 (human)	2/1448	0.845289	0.910765	0.950394	-0.0888336	ADAM28;PLCE1
THRB (human)	2034-03-01	0.847131	0.910765	1.00187	-0.0936453	NRP1;ADAMTS9;CBLN2
TFAP2C (human)	2/1485	0.855379	0.915336	1.03361	-0.0914373	BMP10;SEMA6D
NR5A2 (human)	3815-06-01	0.877529	0.93467	1.21715	-0.0822324	CFC1B;BMP10;FAM198B;MICAL2;CFC1;AMOT
RORB (mouse)	1/1020	0.904378	0.947067	0.977181	-0.0531441	ISL1
NR2F1 (mouse)	1/1021	0.904602	0.947067	0.978803	-0.0532323	ISL1
IKZF1 (mouse)	2/1674	0.898276	0.947067	1.06338	-0.0578318	SVEP1;HOXB2
RUNX2 (mouse)	2/1750	0.91198	0.947067	1.09464	-0.059532	CDH10;SYTL5
Stat3 (mouse)	2/1762	0.913982	0.947067	1.12166	-0.0610017	CDH10;FAM198B
PITX2 (human)	3528-05-01	0.913505	0.947067	1.29295	-0.0703171	PCDH7;IGF2;NCAM1;ISL1;CNTNAP4
Sox2 (mouse)	2/1797	0.919584	0.94858	1.05209	-0.0555389	FAM198B;IGF2
TP53 (mouse)	1/1266	0.946402	0.97019	1.07795	-0.0326228	CFC1
LTF (human)	1/1363	0.957403	0.97019	1.10633	-0.0334818	PPP1R3C
NR1H3 (human)	1/1385	0.959571	0.97019	1.10838	-0.0335439	ALPK2
CEBPB (human)	1/1420	0.962797	0.97019	1.11443	-0.0337269	MICAL2
FOXJ1 (human)	1/1484	0.968055	0.97019	1.14649	-0.0346971	NCAM1
GLI2 (human)	1/1465	0.966575	0.97019	1.15188	-0.0348602	IGF2
ESR1 (human)	1/1513	0.97019	0.97019	1.1873	-0.0359322	ZEB1

## Sheet: Cluster 6
Term	Overlap	P-value	Adjusted P-value	Z-score	Combined Score	Genes
FOXL1 (human)	39/5755	6.97623e-06	0.000973999	-1.86175	12.9095	COLEC12;SLC47A1;DNAH6;GMPR;SEMA3E;ANTXR2;IKZF2;SSFA2;RASGRP3;TMEM100;CHN2;NHEDC1;NPY;EPSTI1;MIR492;RSPO3;CGA;RNF152;ZNF521;C21ORF94;RFTN2;EPHA4;MIR218-1;EYA1;IRX3;ARRDC3;DNAH14;SLC16A12;COMMD3;ARHGAP28;STON1-GTF2A1L;CYP27A1;BMP2;H2AFY2;FSHR;TTC3;ID4;ZNF436;SDK2
LEF1 (human)	34/4658	7.73015e-06	0.000973999	-1.48237	10.2789	AHNAK;AMHR2;ZNF518B;DNAH6;LEF1;SEMA3E;ANTXR2;IKZF2;SSFA2;RASGRP3;C5;FLRT2;IFI16;FLRT3;NPY;CHN2;NHEDC1;NTF3;PLXNA2;CGA;WLS;EYA1;ARRDC3;APOA2;COMMD3;STON1-GTF2A1L;DKK1;ACSF2;CYP27A1;DAB2;TTC3;ADAM12;CDH11;SNAI2
HOXD9 (human)	15/1543	0.000264899	0.0171377	-1.71241	6.96348	TFAP2A;RFTN2;GLYATL2;AHNAK;ARRDC3;DNAH14;SEMA3E;ACSF2;BMP2;EPB41L4A;FLRT2;CHN2;ID4;FKBP9;ZNF521
BCL6 (human)	14/1399	0.000324575	0.0171377	-1.65981	6.74957	EYA1;MSX2;ARRDC3;LEF1;SLC16A12;SEMA3E;IKZF2;DAB2;KEL;FLRT2;H2AFY2;C6ORF138;NHEDC1;CGA
TCF4 (human)	28/4210	0.000340034	0.0171377	-1.46929	5.97484	SLC47A1;AMHR2;SETD7;LEF1;TNC;SEMA3E;ANTXR2;SSFA2;C5;IFI16;ADAMTS18;NTF3;HAS2;ZNF521;TFAP2A;RFTN2;GLYATL2;IRX3;SLC16A12;SHISA3;STON1-GTF2A1L;DKK1;DUSP6;ACSF2;CYP27A1;TTC3;FKBP9;LGR5
HNF1A (human)	16/1855	0.000604249	0.0253784	-1.6482	6.05525	EYA1;LEF1;DNAH6;APOA2;SEMA3E;STON1-GTF2A1L;ACSF2;SSFA2;RASGRP3;CYP27A1;C5;IFI16;GRK5;FLRT3;TTC3;CGA
PGR (human)	13/1447	0.00143603	0.0516972	-1.66706	4.93843	EYA1;WIPF1;LEF1;DNAH14;ARHGAP28;STON1-GTF2A1L;SSFA2;RASGRP3;GRK5;FLRT3;CHN2;APLNR;WLS
TBP (human)	18/2486	0.00198683	0.0556311	-1.50214	4.3397	SLC46A3;RFTN2;GLYATL2;EYA1;MSX2;WIPF1;DNAH14;TNC;COMMD3;SEMA3E;ANTXR2;C1ORF168;DKK1;STON1-GTF2A1L;TMEM100;NHEDC1;WLS;EPHB3
E2F1 (human)	26/4207	0.0017729	0.0556311	-1.47954	4.2744	SLC47A1;WIPF1;SETD7;LEF1;GATA4;IKZF2;RASGRP3;EPB41L4A;GRK5;NTF3;CAPN2;RSPO3;RNF152;CD99;TFAP2A;IRX3;WNT5A;SLC16A12;APOA2;C1ORF168;DUSP6;CYP27A1;BMP2;CDH11;SNAI2;ZNF436
FOXC1 (human)	59/13142	0.00338922	0.077644	-1.70634	4.36076	SLC46A3;AMHR2;WIPF1;SETD7;TNC;ODZ4;ANTXR2;IKZF2;TMEM100;ADAMTS3;ADAMTS1;EPSTI1;CAPN2;RSPO3;ZNF521;C21ORF94;WLS;HGSNAT;ARRDC3;SHISA3;STON1-GTF2A1L;CYP27A1;ADAM12;CDH11;ITGA8;ZNF436;FKBP9;COLEC12;CAMK2D;ZNF518B;LEF1;GMPR;SEMA3E;RASGRP3;GRK5;FLRT3;CHN2;NHEDC1;NPY;EPB41L3;NTF3;MIR492;HAS2;CGA;RFTN2;MIR218-1;GLYATL2;EYA1;DNAH14;SLC16A12;ARHGAP28;ACSF2;DAB2;H2AFY2;TTC3;ID4;SNAI2;LGR5;SDK2
CBEPB (human)	18/2598	0.00319872	0.077644	-1.53043	3.91121	EYA1;WIPF1;SLC16A12;COMMD3;ARHGAP28;ANTXR2;C1ORF168;STON1-GTF2A1L;SSFA2;RASGRP3;TMEM144;TMEM100;C5;KEL;IFI16;C6ORF138;CAPN2;CGA
UBTF (human)	12/1493	0.00535922	0.110973	-1.61516	3.55087	KEL;C6ORF138;TTC3;SETD7;DNAH6;WNT5A;DNAH14;CAPN2;ZNF436;SLIT2;RASGRP3;EPHB3
ETS2 (human)	11/1341	0.00660553	0.110973	-1.51744	3.33605	FLRT2;ADAMTS1;CHN2;NHEDC1;LEF1;CDH11;GMPR;SNAI2;RSPO3;GATA4;ODZ4
LEF1 (mouse)	13/1730	0.00653034	0.110973	-1.5087	3.31684	WNT5A;SETD7;APOA2;COMMD3;IKZF2;ACSF2;RASGRP3;BST2;NHEDC1;NTF3;TTC3;EPSTI1;LGR5
JUN (human)	19/2976	0.00591876	0.110973	-1.47974	3.25317	TFAP2A;RFTN2;HGSNAT;GLYATL2;SLC47A1;EYA1;AHNAK;WIPF1;TNC;ARHGAP28;RASGRP3;TMEM100;IFI16;C6ORF138;NHEDC1;CDH11;CAPN2;ZNF436;EPHB3
JUND (human)	11/1380	0.00810335	0.120497	-1.57554	3.33406	EYA1;IFI16;FLRT3;NPY;NHEDC1;ADAM12;CAPN2;COMMD3;ARHGAP28;ANTXR2;STON1-GTF2A1L
MAPK14 (human)	10/1190	0.00812876	0.120497	-1.57446	3.33177	TMEM100;SLC46A3;TMEM144;TFAP2A;C5;KEL;APOA2;CAPN2;HAS2;DUSP6
LOC135440 (human)	4/247	0.0110355	0.154498	-1.68383	3.14468	KEL;SLC16A12;SHISA3;SSFA2
ETS1 (mouse)	12/1681	0.0130253	0.172757	-1.42661	2.50495	ADAMTS3;FLRT2;H2AFY2;NHEDC1;FSHR;CDH11;ITGA8;GMPR;HAS2;GATA4;DKK1;RASGRP3
ARNT (human)	10/1303	0.0146185	0.178255	-1.56617	2.70092	COLEC12;TFAP2A;EPHA4;C6ORF138;CHN2;LEF1;CDH11;KIAA1462;ODZ4;IKZF2
MEF2A (human)	17/2800	0.0148546	0.178255	-1.3834	2.38573	SLC46A3;GLYATL2;CAMK2D;DNAH14;SHISA3;SEMA3E;IKZF2;DUSP6;SSFA2;RASGRP3;CYP27A1;DAB2;FLRT3;CHN2;NHEDC1;TTC3;WLS
IRF8 (human)	11/1550	0.0179497	0.205606	-1.46933	2.32418	TMEM144;TFAP2A;CNTFR;BMP2;KEL;MSX2;GRK5;NHEDC1;CDH11;ID4;STON1-GTF2A1L
PLAU (human)	10/1362	0.0192665	0.206782	-1.50735	2.37572	SLC46A3;TMEM144;CAMK2D;ADAMTS18;NHEDC1;TTC3;HAS2;CGA;LGR5;DKK1
ZBTB16 (human)	11/1572	0.0196935	0.206782	-1.45169	2.28799	EPB41L4A;DAB2;EYA1;CHN2;NHEDC1;LEF1;KIAA1462;COMMD3;ARHGAP28;STON1-GTF2A1L;RASGRP3
HMGA1 (human)	10/1379	0.0207888	0.209551	-1.45858	2.27946	RFTN2;C5;LEF1;WNT5A;RSPO3;SEMA3E;CGA;ZNF521;SSFA2;WLS
NR5A1 (human)	10/1389	0.0217246	0.210561	-1.41847	2.20994	SLC47A1;AMHR2;NTF3;DNAH14;APLNR;ARHGAP28;ZNF436;SEMA3E;CGA;RASGRP3
MIR210 (human)	1970-02-01	0.0254866	0.237875	-1.57273	2.25846	C6ORF138;ODZ4
HINFP (human)	17/3047	0.0309587	0.278628	-1.25833	1.60799	MSX2;DNAH14;KIAA1462;SEMA3E;IKZF2;DUSP6;EPB41L4A;KEL;IFI16;TTC3;CAPN2;ID4;SNAI2;RSPO3;SLIT2;CGA;RNF152
JDP2 (human)	10/1488	0.0327204	0.284329	-1.39361	1.75264	GLYATL2;H2AFY2;FSHR;TTC3;DNAH14;ZNF436;SEMA3E;DKK1;ACSF2;SSFA2
FOXA3 (human)	3/207	0.0357992	0.300713	-1.58397	1.90329	COMMD3;ARHGAP28;RASGRP3
Sox5 (mouse)	6/728	0.0407413	0.331187	-1.5117	1.67054	CNTFR;SLC47A1;GMPR;RSPO3;SEMA3E;CGA
TCFAP2A (human)	9/1367	0.0466375	0.332325	-1.34146	1.47781	CNTFR;GRK5;IRX3;CDH11;COMMD3;SLIT2;IKZF2;RNF152;ZNF521
Sox2 (mouse)	11/1797	0.04543	0.332325	-1.31409	1.44765	HGSNAT;DAB2;ADAMTS3;EYA1;FLRT2;NHEDC1;ARRDC3;ITGA8;COMMD3;SEMA3E;FKBP9
NFAT2 (human)	9/1376	0.0482485	0.332325	-1.29716	1.429	TMEM100;TFAP2A;RFTN2;C6ORF138;LEF1;EPB41L3;ADAM12;APOA2;HAS2
STAT5B (human)	9/1379	0.0487937	0.332325	-1.29588	1.42759	TMEM144;EYA1;H2AFY2;FLRT3;ARRDC3;ZNF521;DKK1;RASGRP3;EPHB3
ZBTB7A (human)	9/1373	0.0477074	0.332325	-1.29375	1.42525	EPHA4;GRK5;IRX3;LEF1;ADAM12;COMMD3;SLIT2;RNF152;CD99
SMAD4 (mouse)	10/1580	0.046038	0.332325	-1.27655	1.4063	CNTFR;BMP2;WIPF1;CHN2;ADAM12;RSPO3;COMMD3;IKZF2;ACSF2;EPHB3
AHR (human)	9/1391	0.0510156	0.338314	-1.30399	1.41324	IRX3;DNAH14;APLNR;COMMD3;SNAI2;IKZF2;STON1-GTF2A1L;DUSP6;EPHB3
Hand1::Tcfe2a (mouse)	2/110	0.0567831	0.340699	-1.39013	1.49683	RFTN2;CHN2
GABPA (human)	2/108	0.0550034	0.340699	-1.31117	1.41181	APLNR;ZNF436
POU1F1 (human)	9/1408	0.0542771	0.340699	-1.26079	1.35757	C5;EYA1;IFI16;FLRT3;FSHR;ARRDC3;SEMA3E;ANTXR2;CGA
CEBPB (human)	9/1420	0.0566603	0.340699	-1.23509	1.32989	GLYATL2;KEL;FLRT2;EYA1;CHN2;NHEDC1;APOA2;CAPN2;STON1-GTF2A1L
NKX2-8 (human)	3/256	0.0598462	0.350727	-1.33307	1.39672	GMPR;ACSF2;EPHB3
ARID3A (mouse)	11/1893	0.061467	0.352038	-1.27837	1.33464	BST2;CYP27A1;MIR218-1;HGSNAT;CAMK2D;HAS2;COMMD3;SEMA3E;FKBP9;CGA;SDK2
Tal1::Gata1 (mouse)	2018-01-01	0.0632347	0.354115	0.433443	-0.449972	GRK5
NFIC (human)	21/4403	0.0722192	0.387218	-1.14445	1.08582	SLC46A3;EYA1;MSX2;LEF1;DNAH6;DNAH14;GATA4;ODZ4;STON1-GTF2A1L;DKK1;DUSP6;C5;EPB41L4A;KEL;NHEDC1;NTF3;APLNR;SLIT2;FKBP9;SDK2;WLS
MIB2 (human)	9/1490	0.0719237	0.387218	-1.11322	1.05619	CNTFR;ADAMTS3;GRK5;SETD7;LEF1;CAPN2;SLC16A12;SHISA3;ZNF436
SOX10 (human)	2/139	0.0846658	0.426715	-1.22483	1.04311	TMEM144;IKZF2
SMARCA2 (human)	9/1536	0.0832404	0.426715	-1.18637	1.01036	SLC46A3;KEL;AMHR2;MSX2;CDH11;ID4;ZNF436;STON1-GTF2A1L;DUSP6
CBEPA (mouse)	10/1764	0.0828013	0.426715	-1.09857	0.935584	DAB2;ADAMTS3;AMHR2;FLRT2;NHEDC1;SETD7;ID4;APLNR;SEMA3E;CGA
E2F6 (human)	8/1358	0.0971146	0.455729	-1.06993	0.840812	EPB41L4A;ADAMTS1;CDH11;COMMD3;GATA4;ZNF436;DUSP6;ACSF2
TEAD2 (mouse)	9/1591	0.0981238	0.455729	-1.06137	0.834088	DAB2;ADAMTS3;ADAMTS1;LEF1;NTF3;RSPO3;ARHGAP28;IKZF2;DKK1
CBEPA (human)	8/1366	0.0995815	0.455729	-1.05481	0.828926	TMEM100;TFAP2A;ID4;RSPO3;ZNF436;RNF152;RASGRP3;WLS
RELA (human)	14/2775	0.0943869	0.455729	-1.00288	0.788121	TFAP2A;HGSNAT;AMHR2;IRX3;SLC16A12;GATA4;DUSP6;EPB41L4A;ADAMTS18;TTC3;PLXNA2;RSPO3;ZNF436;CD99
POU2F2 (human)	14/2792	0.0979838	0.455729	-0.980504	0.770535	EYA1;ARRDC3;SLC16A12;TNC;COMMD3;ARHGAP28;SEMA3E;DUSP6;RASGRP3;DAB2;TTC3;EPB41L3;ID4;CGA
NR5A2 (human)	18/3815	0.101273	0.455729	-0.850061	0.668026	SLC47A1;EYA1;WIPF1;ZNF518B;SLC16A12;ACSF2;RASGRP3;CYP27A1;TMEM100;KEL;ADAM12;NTF3;APLNR;EPSTI1;HAS2;ZNF436;SLIT2;CD99
MZF1 (human)	8/1389	0.106872	0.472488	-1.02165	0.765977	EPB41L4A;C6ORF138;ADAMTS1;ADAMTS18;SETD7;NTF3;STON1-GTF2A1L;CD99
ATF4 (human)	8/1398	0.109805	0.477083	-1.00996	0.747432	TMEM144;CAMK2D;MSX2;TTC3;HAS2;CGA;LGR5;DKK1
TP53 (human)	14/2866	0.114637	0.489636	-0.872405	0.622978	TFAP2A;EYA1;IRX3;GMPR;GATA4;ODZ4;ANTXR2;RASGRP3;TMEM100;C6ORF138;TTC3;APLNR;CAPN2;ZNF436
Prrx2 (mouse)	2205-11-01	0.137489	0.528243	-0.993433	0.634008	TMEM144;MIR218-1;DAB2;SLC47A1;FLRT3;NHEDC1;ITGA8;ID4;PLXNA2;FKBP9;SDK2
GATA6 (human)	8/1447	0.126546	0.528243	-0.985529	0.628964	CAMK2D;EYA1;NPY;ARHGAP28;SEMA3E;ANTXR2;CGA;RASGRP3
REPIN1 (human)	8/1466	0.133383	0.528243	-0.983259	0.627515	EPHA4;HGSNAT;GRK5;C6ORF138;SLC16A12;PLXNA2;SLIT2;DUSP6
PRDM1 (human)	8/1468	0.134114	0.528243	-0.953584	0.608577	CYP27A1;TMEM144;TFAP2A;GLYATL2;ADAMTS18;APLNR;ID4;STON1-GTF2A1L
GATA1 (human)	13/2679	0.130597	0.528243	-0.881186	0.562372	EYA1;ZNF518B;LEF1;SSFA2;RASGRP3;TMEM100;DAB2;FLRT3;NPY;TTC3;EPB41L3;CAPN2;CGA
TFAP2C (human)	8/1485	0.14041	0.528243	-0.867029	0.553337	TFAP2A;BMP2;AHNAK;H2AFY2;PLXNA2;GATA4;ANTXR2;DUSP6
MYCN (human)	1942-01-01	0.137482	0.528243	-0.0263091	0.0167905	COMMD3
SMAD3 (human)	1943-01-01	0.140446	0.528243	0.0515138	-0.0328761	HAS2
FOXD1 (human)	2/192	0.143344	0.531215	-1.10346	0.698038	HGSNAT;SHISA3
ETS1 (human)	21/4827	0.148396	0.537397	-0.854766	0.530826	EYA1;MSX2;ARRDC3;LEF1;DNAH6;TNC;GMPR;GATA4;DKK1;FLRT2;GRK5;ADAMTS1;NTF3;EPB41L3;CDH11;SNAI2;ZNF436;LGR5;ZNF521;SDK2;WLS
PBX1 (human)	1946-01-01	0.149277	0.537397	-0.392313	0.243634	ARHGAP28
Nobox (mouse)	2/201	0.154016	0.546647	-1.00477	0.60683	TMEM144;FKBP9
XBP1 (human)	4/605	0.15717	0.550093	-1.00492	0.600606	TTC3;ADAM12;SHISA3;IKZF2
Arnt::Ahr (mouse)	2/207	0.161215	0.550356	-0.98799	0.590017	EPHA4;DKK1
SMAD4 (human)	8/1542	0.162588	0.550356	-0.838977	0.501028	AMHR2;MSX2;IRX3;NHEDC1;LEF1;WNT5A;CAPN2;EPHB3
ESR2 (mouse)	1951-01-01	0.163797	0.550356	0.0200165	-0.0119536	BMP2
FOXI1 (human)	2/217	0.173346	0.567314	-0.974438	0.552352	EPSTI1;COMMD3
HLF (human)	1954-01-01	0.17239	0.567314	-0.393003	0.222771	EYA1
FOXM1 (human)	1958-01-01	0.183713	0.593534	-0.111208	0.0580131	EPSTI1
SP3 (mouse)	6/1129	0.194725	0.6063	-0.747567	0.374067	SLC46A3;DAB2;FLRT2;ADAMTS1;ADAMTS18;SLC16A12
LTF (human)	7/1363	0.190625	0.6063	-0.743078	0.371821	TMEM100;FLRT2;C6ORF138;NHEDC1;TTC3;ANTXR2;RASGRP3
NFIL3 (human)	1962-01-01	0.194882	0.6063	-0.332847	0.16655	EYA1
MYOG (human)	7/1404	0.210366	0.638479	-0.708389	0.31783	TFAP2A;HGSNAT;GLYATL2;EYA1;WIPF1;COMMD3;SNAI2
MYB (human)	7/1409	0.212826	0.638479	-0.697512	0.31295	EYA1;MSX2;C6ORF138;NPY;EPSTI1;SHISA3;ARHGAP28
NFE2 (human)	2681-12-01	0.211169	0.638479	-0.577705	0.259197	CNTFR;EPHA4;EPB41L4A;SLC47A1;AHNAK;WIPF1;LEF1;DNAH14;CAPN2;STON1-GTF2A1L;DKK1;RASGRP3
SRY (human)	3/469	0.220647	0.654154	-0.957182	0.40624	C6ORF138;ANTXR2;ACSF2
PURA (human)	3/492	0.241475	0.669959	-0.76052	0.304617	CHN2;CDH11;RSPO3
THRA (human)	2/271	0.240795	0.669959	-0.741466	0.296985	TNC;SSFA2
IRF2 (mouse)	8/1706	0.23461	0.669959	-0.608724	0.243817	DAB2;AMHR2;FLRT2;H2AFY2;NHEDC1;SETD7;EPSTI1;SEMA3E
RELB (human)	7/1469	0.243163	0.669959	-0.602437	0.241299	TMEM100;TFAP2A;C6ORF138;WIPF1;IRX3;GATA4;ODZ4
GATA3 (human)	2505-11-01	0.243622	0.669959	-0.549509	0.220099	EYA1;NPY;CHN2;SETD7;DNAH6;ARHGAP28;GATA4;SEMA3E;ANTXR2;CD99;RASGRP3
ELK1 (mouse)	8/1727	0.244588	0.669959	-0.504249	0.201971	SLC47A1;H2AFY2;ADAMTS18;NHEDC1;ITGA8;CAPN2;DKK1;SSFA2
STAT3 (human)	2759-12-01	0.239893	0.669959	-0.504125	0.201921	BMP2;CAMK2D;FLRT3;FSHR;ADAM12;DNAH14;SHISA3;ZNF436;STON1-GTF2A1L;CD99;SSFA2;RASGRP3
FOXJ1 (human)	7/1484	0.250964	0.680031	-0.566924	0.218616	TMEM144;WIPF1;LEF1;COMMD3;IKZF2;C1ORF168;RASGRP3
MIR133B (human)	7/1500	0.259371	0.681997	-0.547567	0.20957	WIPF1;CAPN2;ARHGAP28;RNF152;DKK1;EPHB3;WLS
NR5A2 (mouse)	8/1748	0.254711	0.681997	-0.516084	0.197521	AHNAK;AMHR2;H2AFY2;ID4;EPSTI1;DKK1;ACSF2;RASGRP3
JUND (mouse)	8/1764	0.262515	0.681997	-0.477255	0.18266	RFTN2;FLRT2;NPY;LEF1;SNAI2;CGA;ANTXR2;RASGRP3
NFYA (human)	2549-11-01	0.261411	0.681997	-0.44297	0.169538	SLC46A3;DAB2;KEL;FLRT2;MSX2;C6ORF138;DNAH14;LEF1;EPB41L3;SHISA3;WLS
CBFB (human)	4/774	0.277974	0.714791	-0.616627	0.207042	EPHA4;CAMK2D;KIAA1462;STON1-GTF2A1L
NFATC3 (mouse)	8/1801	0.28084	0.714866	-0.421153	0.141365	CYP27A1;COLEC12;HGSNAT;DAB2;WIPF1;FLRT3;NHEDC1;APLNR
TEAD1 (human)	7/1547	0.284534	0.717026	-0.46975	0.156259	TMEM100;CYP27A1;WIPF1;CHN2;ID4;PLXNA2;STON1-GTF2A1L
MYC (human)	6/1302	0.292663	0.730208	-0.492539	0.154867	CHN2;ADAMTS18;TTC3;COMMD3;SEMA3E;SHISA3
MZF1_5-13 (human)	2/316	0.297936	0.736076	-0.715155	0.219139	CHN2;RASGRP3
CRTC1 (human)	5/1086	0.320017	0.740622	-0.41609	0.124937	SLC46A3;CYP27A1;TMEM144;APOA2;RNF152
CACYBP (human)	6/1350	0.321638	0.740622	-0.391706	0.117616	TFAP2A;IRX3;NTF3;CDH11;RNF152;STON1-GTF2A1L
HNF4A (human)	2127-09-01	0.310714	0.740622	-0.351517	0.105548	TFAP2A;FLRT2;EYA1;MSX2;FLRT3;IRX3;STON1-GTF2A1L;DKK1;RASGRP3
GATA2 (human)	37/9985	0.323287	0.740622	-0.348908	0.104765	COLEC12;SLC46A3;WIPF1;ZNF518B;LEF1;GMPR;SEMA3E;SNORD115-1;ANTXR2;IKZF2;RASGRP3;TMEM144;TMEM100;IFI16;ADAMTS1;NPY;CHN2;NTF3;EPSTI1;C21ORF94;WLS;TFAP2A;EPHA4;GLYATL2;EYA1;IRX3;SHISA3;STON1-GTF2A1L;CYP27A1;DAB2;KEL;FSHR;TTC3;ITGA8;ID4;SNAI2;ZNF436
Gata1 (mouse)	8/1863	0.312302	0.740622	-0.32636	0.0979945	RFTN2;ADAMTS3;GRK5;FLRT3;NPY;TTC3;DKK1;LGR5
EGR1 (mouse)	7/1617	0.323069	0.740622	-0.315795	0.0948222	CNTFR;NTF3;TTC3;ID4;SLIT2;IKZF2;SSFA2
SOX9 (human)	1/105	0.305803	0.740622	-0.256878	0.0771316	C6ORF138
RORA_1 (human)	1/107	0.310577	0.740622	-0.224177	0.0673125	ADAM12
FOXO3A (mouse)	3/597	0.339364	0.741963	-0.454089	0.135526	H2AFY2;SLIT2;CGA
PCBP1 (human)	6/1360	0.327736	0.741963	-0.362597	0.108219	EPHA4;IRX3;CDH11;SLIT2;RNF152;CD99
RARA (human)	6/1379	0.339366	0.741963	-0.334782	0.0999177	CNTFR;C5;AHNAK;FLRT3;CAPN2;RASGRP3
NR1I2 (human)	6/1387	0.344279	0.741963	-0.326735	0.097516	TMEM144;C5;GMPR;CGA;STON1-GTF2A1L;C1ORF168
MAX (human)	1934-08-01	0.34922	0.741963	-0.254596	0.0759856	CYP27A1;CNTFR;GRK5;ADAMTS18;CHN2;SHISA3;SLIT2;IKZF2
POU2F1 (human)	6/1399	0.351662	0.741963	-0.249415	0.0744394	DAB2;ARRDC3;TNC;ID4;COMMD3;CGA
ETV4 (human)	6/1403	0.354127	0.741963	-0.227022	0.0677563	CDH11;PLXNA2;HAS2;ODZ4;STON1-GTF2A1L;LGR5
CACYBP (mouse)	7/1656	0.344945	0.741963	-0.208138	0.0621202	BST2;CNTFR;CAMK2D;ADAMTS3;TTC3;APLNR;DKK1
NFIA (human)	6/1416	0.362149	0.741963	-0.203485	0.0607315	CNTFR;FSHR;CAPN2;SEMA3E;ACSF2;RASGRP3
TFAP2A (human)	14/3613	0.361454	0.741963	-0.188304	0.0562004	TFAP2A;CNTFR;EPHA4;IRX3;LEF1;WNT5A;GATA4;ODZ4;IKZF2;DUSP6;SLIT2;FKBP9;RNF152;CD99
MYOG (mouse)	7/1675	0.355677	0.741963	-0.15416	0.04601	CYP27A1;WNT5A;LEF1;ITGA8;SEMA3E;RNF152;RASGRP3
RUNX1 (human)	15/3857	0.348131	0.741963	-0.0901915	0.0269182	SLC46A3;TFAP2A;MSX2;ZNF518B;ARRDC3;LEF1;DNAH6;DNAH14;TNC;STON1-GTF2A1L;TMEM144;KEL;ADAMTS18;CAPN2;EPSTI1
E2F1 (mouse)	3056-12-01	0.36078	0.741963	-0.0499104	0.0148961	BST2;CAMK2D;AHNAK;EYA1;WIPF1;NPY;FSHR;PLXNA2;RSPO3;SHISA3;SLIT2;DKK1
JUN (mouse)	7/1699	0.369287	0.744482	-0.0933339	0.0275397	TMEM144;CAMK2D;ADAMTS1;SNAI2;ODZ4;LGR5;RASGRP3
FOXO3 (human)	1/132	0.367575	0.744482	-0.0220752	0.00651363	HGSNAT
FOXA1 (mouse)	7/1705	0.372697	0.745393	-0.144007	0.0423156	COLEC12;WIPF1;ADAM12;CAPN2;EPSTI1;SHISA3;CGA
MTF1 (human)	6/1440	0.376989	0.748042	-0.161499	0.0468827	TFAP2A;HGSNAT;EPB41L4A;WIPF1;LEF1;CD99
Pdx1 (mouse)	4/907	0.381382	0.750847	-0.296282	0.0849007	NHEDC1;ARRDC3;ID4;FKBP9
SRF (human)	13/3420	0.396796	0.775135	0.0757271	-0.019289	GLYATL2;AMHR2;EYA1;MSX2;LEF1;DNAH14;STON1-GTF2A1L;TMEM100;C5;KEL;CHN2;CAPN2;FKBP9
Stat3 (mouse)	7/1762	0.405171	0.785408	-0.0354771	0.00856954	BST2;HGSNAT;ADAMTS3;WIPF1;FLRT3;ARRDC3;ITGA8
ETV4 (mouse)	7/1773	0.411444	0.79148	-0.0236606	0.00553304	GRK5;ADAMTS18;ITGA8;SHISA3;FKBP9;WLS;RASGRP3
EGR1 (human)	3/681	0.417611	0.797257	-0.165321	0.0374582	RFTN2;ODZ4;DUSP6
ELK1 (human)	6/1511	0.420951	0.797591	-0.057651	0.0130383	MSX2;GRK5;KIAA1462;LGR5;STON1-GTF2A1L;DUSP6
ATF2 (human)	6/1517	0.424658	0.798611	-0.029883	0.00672011	IRX3;SHISA3;SEMA3E;IKZF2;C1ORF168;RASGRP3
Klf4 (mouse)	1/163	0.431814	0.803546	0.0388544	-0.00849825	IRX3
USF2 (human)	14/3792	0.43366	0.803546	0.194429	-0.0425256	SLC46A3;CAMK2D;MSX2;WIPF1;ARRDC3;SHISA3;SEMA3E;RASGRP3;CYP27A1;ADAMTS18;CHN2;TTC3;CGA;WLS
MZF1_1-4 (human)	2705-10-01	0.456153	0.839055	-0.150323	0.0263785	BST2;SNORD115-6;CNTFR;WIPF1;CHN2;CAPN2;TNC;IKZF2;ZNF521;C1ORF168
NFKB1 (mouse)	3284-12-01	0.459789	0.839614	0.226114	-0.0395276	HGSNAT;BMP2;EYA1;WIPF1;ADAMTS18;NPY;ITGA8;APOA2;APLNR;SLC16A12;GATA4;EPHB3
NR5A1 (mouse)	4/1020	0.468486	0.839617	-0.0280968	0.00491158	NHEDC1;FSHR;TTC3;RNF152
NR3C1 (human)	6/1590	0.469464	0.839617	0.0647477	-0.0113185	TMEM100;CNTFR;IFI16;CHN2;SEMA3E;STON1-GTF2A1L
AP1 (mouse)	1/183	0.469786	0.839617	0.0779915	-0.0136336	ARHGAP28
RORB (human)	4/1035	0.479769	0.851421	-0.0183128	0.0029456	ADAMTS18;TNC;SEMA3E;SSFA2
Sox17 (mouse)	2/500	0.516059	0.852277	-0.0352583	0.00563581	ITGA8;SSFA2
NR2F1 (human)	4/1073	0.507939	0.852277	0.0190322	-0.00304218	ADAMTS18;TNC;SEMA3E;SSFA2
MIR138 (human)	5/1356	0.503066	0.852277	0.0467436	-0.00747167	COLEC12;TFAP2A;CAPN2;COMMD3;DUSP6
PRDM1 (mouse)	1/196	0.49311	0.852277	0.0600653	-0.00960106	EPSTI1
Nkx2-5 (mouse)	2/515	0.531901	0.852277	0.072641	-0.0116112	MIR218-1;EPHA4
TBX5 (mouse)	6/1663	0.51337	0.852277	0.163085	-0.026068	ADAMTS18;APLNR;CGA;LGR5;RNF152;RASGRP3
RELA (mouse)	6/1656	0.509212	0.852277	0.170281	-0.0272184	EPHA4;ADAMTS3;CDH11;EPSTI1;COMMD3;ACSF2
FOS (human)	5/1394	0.527723	0.852277	0.17436	-0.0278704	CYP27A1;RFTN2;NHEDC1;CAPN2;RASGRP3
HIVEP1 (human)	1/218	0.530289	0.852277	0.176516	-0.0282149	TMEM144
EIF4EBP1 (human)	1/212	0.520426	0.852277	0.179079	-0.0286246	IKZF2
STAT1 (human)	6/1667	0.515741	0.852277	0.184512	-0.029493	EYA1;FLRT3;LEF1;SHISA3;ANTXR2;ZNF521
SPI1 (mouse)	6/1680	0.523417	0.852277	0.239096	-0.038218	RFTN2;NPY;SETD7;EPSTI1;ODZ4;WLS
YY1 (human)	21/6042	0.520576	0.852277	0.256927	-0.0410682	SNORD115-6;HGSNAT;EYA1;LEF1;SETD7;DNAH14;GMPR;ARHGAP28;SEMA3E;C1ORF168;RASGRP3;C5;DAB2;H2AFY2;IFI16;FLRT3;TTC3;EPSTI1;MIR492;ZNF436;LGR5
SAMD9L (human)	5/1415	0.541128	0.852277	0.258332	-0.0412927	TMEM144;TMEM100;WIPF1;ZNF436;RASGRP3
IRF2 (human)	5/1412	0.539223	0.852277	0.25978	-0.0415242	TMEM144;C6ORF138;ADAMTS18;KIAA1462;SLC16A12
MYC (mouse)	6/1699	0.534553	0.852277	0.285079	-0.0455681	TMEM100;TMEM144;CAMK2D;SLC16A12;COMMD3;ACSF2
YY1 (mouse)	6/1700	0.535137	0.852277	0.326227	-0.0521453	CNTFR;CAMK2D;WIPF1;CHN2;SETD7;RSPO3
FOS (mouse)	6/1708	0.539793	0.852277	0.335128	-0.053568	RFTN2;ADAMTS3;SLC47A1;CAPN2;ACSF2;RASGRP3
TP63 (human)	5/1443	0.558735	0.871451	0.251755	-0.0346404	SLC46A3;TTC3;APLNR;KIAA1462;RASGRP3
GTF2I (human)	1/237	0.560219	0.871451	0.265007	-0.0364637	ANTXR2
POU1F1 (mouse)	6/1754	0.566181	0.875323	0.374625	-0.0498859	HGSNAT;KEL;WIPF1;ARHGAP28;ODZ4;IKZF2
GLI2 (human)	5/1465	0.57234	0.879449	0.352708	-0.0453087	CAMK2D;WIPF1;ADAM12;LEF1;WLS
BRCA1 (human)	6/1809	0.596795	0.888715	0.250311	-0.0295315	SLC47A1;NPY;ITGA8;SNORD115-20;CD99;EPHB3
HOXA5 (human)	3000-10-01	0.591765	0.888715	0.264877	-0.03125	C6ORF138;ZNF518B;TTC3;ARRDC3;DNAH6;HAS2;RSPO3;ZNF436;SSFA2;WLS
ATF1 (human)	1/264	0.59953	0.888715	0.3546	-0.0418353	TNC
CEBPD (human)	5/1495	0.590549	0.888715	0.35811	-0.0422495	CYP27A1;TTC3;DNAH6;CAPN2;FKBP9
ZFHX3 (human)	5/1504	0.595932	0.888715	0.3823	-0.0451034	AMHR2;DNAH6;FKBP9;C1ORF168;STON1-GTF2A1L
WT1 (human)	2689-09-01	0.586151	0.888715	0.503296	-0.0593784	IRX3;LEF1;CDH11;PLXNA2;RSPO3;SLIT2;IKZF2;ZNF521;RNF152
PPARA (human)	1/271	0.609141	0.894638	0.346255	-0.0385505	ACSF2
RBPJ (human)	5/1535	0.614176	0.894638	0.457824	-0.0509722	BMP2;CAMK2D;LEF1;SNAI2;RNF152
CREB1 (human)	2749-09-01	0.613367	0.894638	0.575002	-0.0640183	TMEM144;HGSNAT;WIPF1;CHN2;TTC3;DNAH14;CGA;RNF152;EPHB3
SPI1 (human)	5/1638	0.671311	0.972243	0.425892	-0.0119887	FLRT3;APLNR;COMMD3;STON1-GTF2A1L;EPHB3
CRTC3 (human)	3/1008	0.678869	0.977572	0.382459	-0.00867547	IFI16;DNAH6;SETD7
PITX2 (human)	3528-11-01	0.682864	0.977738	0.712077	-0.0160317	TMEM100;DAB2;SLC47A1;IFI16;FSHR;TTC3;ARRDC3;SLC16A12;STON1-GTF2A1L;SSFA2;RASGRP3
FOXF1 (human)	4/1352	0.689794	0.98208	0.48187	-0.00871356	TMEM100;C5;FLRT3;RASGRP3
SREBF2 (human)	4/1361	0.694807	0.983659	0.511569	-0.00842835	ADAMTS1;CDH11;CAPN2;STON1-GTF2A1L
REL (human)	1/353	0.706073	0.987431	0.403209	-0.00510025	GATA4
NR1H3 (human)	4/1385	0.707898	0.987431	0.523388	-0.00662041	C5;AHNAK;STON1-GTF2A1L;RASGRP3
SP1 (human)	4/1406	0.719022	0.987431	0.546671	-0.00691493	EPHA4;IRX3;CDH11;RNF152
RXRA (human)	4/1422	0.72729	0.987431	0.572482	-0.00724141	FLRT3;APOA2;CAPN2;CD99
POU2F1 (mouse)	5/1735	0.719908	0.987431	0.604751	-0.00764959	TMEM100;CYP27A1;DAB2;EYA1;ANTXR2
STAT5B (mouse)	5/1729	0.717053	0.987431	0.612814	-0.00775157	TMEM144;HGSNAT;WIPF1;CAPN2;TNC
HMGA1 (mouse)	5/1748	0.726026	0.987431	0.636178	-0.00804711	COLEC12;DAB2;FLRT2;FSHR;ODZ4
POU2F2 (mouse)	5/1754	0.728818	0.987431	0.653812	-0.00827016	CYP27A1;DAB2;EYA1;ADAM12;CAPN2
AHR (mouse)	1/454	0.793333	0.991792	0.523282	-0.00431306	TMEM100
Pax2 (mouse)	4/1516	0.772288	0.991792	0.562	-0.00463219	SLC46A3;ID4;RSPO3;ARHGAP28
HNF4A (mouse)	1/461	0.798327	0.991792	0.58526	-0.0048239	IRX3
HIF1A (mouse)	3/1124	0.748201	0.991792	0.60307	-0.0049707	WNT5A;RSPO3;SLIT2
NR1H2 (human)	1/479	0.810626	0.991792	0.62225	-0.00512878	C5
RXRA (mouse)	1/507	0.828298	0.991792	0.622607	-0.00513172	HAS2
CREB1 (mouse)	2/849	0.793711	0.991792	0.635063	-0.00523439	H2AFY2;EPHB3
KLF13 (human)	4/1453	0.742803	0.991792	0.635819	-0.00524063	TFAP2A;C6ORF138;ADAM12;DKK1
FOXA1 (human)	4/1457	0.744756	0.991792	0.643708	-0.00530565	EPSTI1;IKZF2;STON1-GTF2A1L;RASGRP3
ELF5 (mouse)	1/556	0.855384	0.991792	0.679054	-0.00559698	WIPF1
SND1 (human)	4/1473	0.752458	0.991792	0.697263	-0.00574707	H2AFY2;COMMD3;DUSP6;RASGRP3
HIF1A (human)	4/1586	0.801923	0.991792	0.724194	-0.00596904	FLRT3;APLNR;STON1-GTF2A1L;RASGRP3
En1 (mouse)	2/957	0.845554	0.991792	0.727981	-0.00600025	CNTFR;SDK2
TFAP2D (human)	3/1324	0.839475	0.991792	0.792445	-0.00653159	HGSNAT;GMPR;RASGRP3
SP3 (human)	3/1332	0.842455	0.991792	0.804448	-0.00663052	IRX3;CDH11;RNF152
ZNF281 (human)	2/986	0.857329	0.991792	0.837496	-0.00690291	CDH11;GATA4
SREBF1 (human)	2587-07-01	0.797634	0.991792	0.841028	-0.00693202	SLC46A3;TFAP2A;ADAMTS3;AHNAK;ARRDC3;CAPN2;ODZ4
ZNF354C (human)	3/1430	0.875279	0.991792	0.843107	-0.00694916	TMEM144;C5;IKZF2
NRF1 (human)	3/1356	0.851112	0.991792	0.856937	-0.00706315	TTC3;ARRDC3;DUSP6
APEX1 (human)	3/1373	0.856995	0.991792	0.871735	-0.00718512	HGSNAT;NHEDC1;KIAA1462
TEAD4 (human)	3/1354	0.850406	0.991792	0.880593	-0.00725813	EPB41L4A;IRX3;CDH11
CBEPB (mouse)	3275-09-01	0.808041	0.991792	0.896262	-0.00738728	RFTN2;COLEC12;CNTFR;CAMK2D;CHN2;ARRDC3;HAS2;SNAI2;ANTXR2
SP1 (mouse)	2360-06-01	0.831715	0.991792	0.904076	-0.00745168	CNTFR;CAMK2D;IRX3;LEF1;ID4;IKZF2
RBPJ (mouse)	4/1735	0.854768	0.991792	0.928395	-0.00765213	FLRT3;CDH11;SLC16A12;RASGRP3
RORB (mouse)	2/1020	0.870098	0.991792	0.951881	-0.00784571	FSHR;ITGA8
NR2F1 (mouse)	2/1021	0.870458	0.991792	0.953492	-0.00785899	FSHR;ITGA8
KLF11 (human)	3/1388	0.862018	0.991792	0.961456	-0.00792463	TFAP2A;RNF152;STON1-GTF2A1L
RUNX2 (mouse)	4/1750	0.859371	0.991792	0.980945	-0.00808526	RFTN2;CNTFR;WNT5A;DKK1
REL (mouse)	4/1752	0.859976	0.991792	0.987302	-0.00813766	BST2;H2AFY2;CHN2;ACSF2
SPIB (human)	1/760	0.929472	0.991792	0.998987	-0.00823397	WLS
CREM (human)	1/662	0.900353	0.991792	1.01499	-0.00836587	NHEDC1
USF1 (human)	3/1441	0.878563	0.991792	1.01664	-0.00837944	ADAMTS18;CHN2;SHISA3
IRF8 (mouse)	4/1770	0.865318	0.991792	1.0332	-0.00851596	CAMK2D;APOA2;APLNR;IKZF2
FOXA2 (mouse)	3/1441	0.878563	0.991792	1.03834	-0.00855831	NPY;WNT5A;LGR5
KLF5 (human)	3/1445	0.879738	0.991792	1.03852	-0.00855983	WIPF1;IRX3;DUSP6
ELK4 (human)	3/1453	0.882059	0.991792	1.0798	-0.00890004	APOA2;ZNF436;GATA4
RUNX2 (human)	3/1458	0.88349	0.991792	1.08276	-0.00892445	IFI16;SEMA3E;STON1-GTF2A1L
TEAD2 (human)	3/1486	0.891222	0.991792	1.11873	-0.00922097	CNTFR;CDH11;ZNF436
KLF4 (human)	3/1485	0.890954	0.991792	1.14424	-0.00943119	TFAP2A;RNF152;STON1-GTF2A1L
ELF3 (human)	3/1488	0.891757	0.991792	1.16659	-0.00961539	APLNR;GATA4;STON1-GTF2A1L
NFKB1 (human)	3497-09-01	0.864451	0.991792	1.17359	-0.00967307	HGSNAT;EPB41L4A;APOA2;SLC16A12;PLXNA2;GATA4;RNF152;CD99;DUSP6
ZNF148 (human)	3/1591	0.916328	0.991792	1.1819	-0.0097416	TFAP2A;APOA2;RNF152
THRB (human)	2034-04-01	0.925854	0.991792	1.20585	-0.00993898	AMHR2;AHNAK;ADAM12;DUSP6
NR3C1 (mouse)	3/1775	0.948069	0.991792	1.22543	-0.0101004	SLC46A3;AMHR2;PLXNA2
GFI1 (human)	2/1427	0.960012	0.991792	1.24209	-0.0102377	AMHR2;TTC3
TFAP2A (mouse)	3/1663	0.930402	0.991792	1.25088	-0.0103102	EPHA4;CAPN2;ACSF2
Nkx3-2 (mouse)	1/1122	0.980539	0.991792	1.25128	-0.0103134	SLC16A12
SRF (mouse)	3/1782	0.949024	0.991792	1.25249	-0.0103235	BST2;LEF1;ITGA8
SNAI2 (human)	2/1428	0.960132	0.991792	1.25912	-0.0103781	CGA;C1ORF168
NRF1 (mouse)	3/1676	0.932701	0.991792	1.26192	-0.0104011	H2AFY2;ARRDC3;TTC3
TCF3 (human)	2/1428	0.960132	0.991792	1.27099	-0.0104759	CGA;C1ORF168
FOXF2 (human)	2/1379	0.953835	0.991792	1.27206	-0.0104847	HGSNAT;AMHR2
SNAI1 (human)	2/1428	0.960132	0.991792	1.28385	-0.0105819	CGA;C1ORF168
PPARG (human)	3580-09-01	0.88187	0.991792	1.29115	-0.0106421	C5;CAMK2D;FLRT3;ADAM12;CAPN2;ZNF436;STON1-GTF2A1L;CD99;RASGRP3
PITX1 (human)	2/1448	0.96246	0.991792	1.32299	-0.0109045	FLRT3;STON1-GTF2A1L
TBP (mouse)	3182-07-01	0.931336	0.991792	1.34778	-0.0111088	BMP2;FLRT2;ADAM12;COMMD3;SEMA3E;SLIT2;DKK1
ESR1 (human)	2/1513	0.969168	0.991792	1.37042	-0.0112955	APOA2;SLC16A12
Myb (mouse)	1902-03-01	0.963066	0.991792	1.37059	-0.0112968	TMEM100;CDH11;RASGRP3
USF1 (mouse)	1/1219	0.986258	0.991792	1.39857	-0.0115274	EPHB3
NFYA (mouse)	2/1748	0.985093	0.991792	1.40978	-0.0116199	NHEDC1;CDH11
NFYB (mouse)	2/1748	0.985093	0.991792	1.41576	-0.0116692	NHEDC1;CDH11
MYOD1 (mouse)	2/1672	0.981097	0.991792	1.41755	-0.0116839	ADAMTS18;SSFA2
CPEB1 (mouse)	2/1748	0.985093	0.991792	1.43046	-0.0117903	NHEDC1;CDH11
TP53 (mouse)	1/1266	0.988395	0.991792	1.43365	-0.0118166	AMHR2
IKZF1 (mouse)	2/1674	0.981214	0.991792	1.44329	-0.011896	KEL;COMMD3
CRX (human)	1/1362	0.991792	0.991792	1.46444	-0.0120704	AMHR2

## Sheet: Cluster 7
Term	Overlap	P-value	Adjusted P-value	Z-score	Combined Score	Genes
TCF4 (human)	56/4210	4.65064e-10	1.24637e-07	-1.52147	24.1882	CPNE4;COL12A1;PRSS23;SLC4A4;SYNE1;RGS5;SOX6;SLC34A2;MBNL1;AMY1A;PDE4D;SERPINF1;PGAM2;USP2;ATP1B4;LMO7;C4ORF49;MTSS1;EMCN;TXLNB;FEZ1;MPPED2;RGN;CASQ1;VGLL1;CFTR;DSC3;REG3A;POPDC3;CALCRL;CREM;AKAP6;NDRG2;HDAC9;ART3;CNN1;ZNF704;ZMAT4;TSPAN2;GSTM3;ZFHX3;PLCL1;LGI2;FAM189A2;NFATC2;PDE4DIP;SNAP91;HIPK3;PLEKHA7;REEP1;TSPAN15;LRCH2;PLCXD3;PKIA;FGF18;BLID
JUND (human)	26/1380	1.141e-07	1.52894e-05	-1.75434	19.4528	CALCRL;PARM1;LRRC10;SLC4A4;HDAC9;THBS1;MYPN;PTPLA;AQP1;RGS5;TDO2;RASSF4;NNT;ZNF704;TSPAN2;ITGB6;SH3BGR;MBNL1;PDE4D;FAM189A2;PDE4DIP;LMO7;COLQ;GPR183;TGFBI;DSC3
FOXC1 (human)	107/13142	4.00615e-07	3.57883e-05	-1.81142	18.5451	CPNE5;CPNE4;ISM1;IFIT1;SLC4A4;PALM2-AKAP2;SYDE2;NPPB;FAM134B;RGS5;TDO2;LIPH;CAPN3;SOX6;BVES;GUCY1A2;SLC34A2;MBNL1;AMY1A;PRKCE;SERPINF1;USP2;LMO7;ATP1B2;ATP1B1;SYTL3;EMCN;FEZ1;LPPR4;CFTR;DSC3;PARM1;C5ORF4;CREM;ILDR2;NDRG2;ART3;SCUBE3;ADAMTS15;KLRK1;ZNF704;ZMAT4;TSPAN2;NKX2-5;PAG1;ZFHX3;NFATC2;REEP1;PLCXD3;ARHGAP31;LRCH2;GPR183;PKIA;TMEM117;FGF18;REN;TGFBI;CPM;SNAP25;GABRB2;DYSF;MYPN;SYNE1;NNT;MYO1…
TBP (human)	34/2486	1.76752e-06	0.000118424	-1.56635	14.1618	CALCRL;ACSS2;AMY2A;AQP10;CREM;DYSF;ILDR2;PRSS23;SLC4A4;HDAC9;MYPN;RGS5;KLRK1;TDO2;NNT;PDGFD;XIRP2;ZNF385D;ITGB6;BVES;PAG1;ANXA1;TRPC3;KCNIP2;PDE4D;USP2;FAM189A2;PDE4DIP;INHBA;GPR183;PKIA;MPPED2;BLID;SCRG1
TEAD1 (human)	25/1547	3.20674e-06	0.000171881	-1.6979	14.7186	SNAP25;AMY2A;NPR3;DYSF;AKAP6;NDRG2;SLC4A4;HDAC9;MYOM2;CALB2;PDGFD;ITGB6;PDLIM5;GPR158;GSTM3;PPP1R14C;PDE4D;USP2;FAM189A2;TNNI3K;PLEKHA7;GPR183;RGN;BLID;TRIM54
MEF2A (human)	35/2800	8.7774e-06	0.000392057	-1.57898	12.3857	POPDC3;GABRB2;CALCRL;PARM1;AMY2A;C5ORF4;CREM;IFIT1;LRRC10;HDAC9;MYPN;PTPLA;SYNE1;CKMT2;RGS5;KLRK1;PDGFD;XIRP2;CAPN3;SOX6;BVES;MBNL1;TRPC3;PDE4D;SERPINF1;FAM189A2;PDE4DIP;INHBA;SNAP91;REEP1;FABP3;EMCN;DES;MPPED2;FGF18
IKZF1 (mouse)	25/1674	1.22811e-05	0.000469377	-1.58333	12.1348	VTCN1;LRRC10;THBS1;MYOM2;CKMT2;ADAMTS15;WNT11;ZMAT4;TNNI3;NKX2-5;SLC34A2;ZFHX3;FAM78A;KCNIP2;CADPS;NFATC2;PDE4DIP;INHBA;MTSS1;PLCXD3;FABP3;MYL2;TCEA3;MPPED2;VGLL1
NFKB1 (human)	40/3497	1.40113e-05	0.000469377	-1.50782	11.5561	REG3A;POPDC3;ACSS2;AMY2A;RRAD;COL12A1;CREM;ILDR2;AKAP6;NDRG2;HDAC9;MYOM2;AQP1;NPPB;SYDE2;KLRK1;NNT;PDGFD;MYO18B;CAPN3;LRRFIP1;SH3BGR;GPR158;CYP2J2;SLC34A2;PPP1R14C;TRPC3;AMY1A;FAM78A;SERPINF1;PDE4D;TNNI3K;COLQ;SMOC2;TSPAN15;DES;EEF1A2;MPPED2;FGF18;CASQ1
SRF (human)	38/3420	4.62797e-05	0.00137811	-1.50522	9.91492	PARM1;CPNE4;COL12A1;CREM;IFIT1;PALM2-AKAP2;TMEM163;THBS1;AQP1;CKMT2;C6ORF145;TDO2;ZNF704;ZMAT4;XIRP2;CAPN3;SOX6;NKX2-5;BVES;GPR133;PAG1;ANXA1;PDE4D;LMO7;ACTA1;KAT2B;PLCXD3;GATM;DES;TXLNB;PKIA;TMEM117;BLID;CASQ1;TGFBI;VGLL1;TRIM54;DSC3
PURA (human)	11/492	0.000156134	0.00418439	-1.76433	9.66217	SYDE2;SNAP25;TPPP3;PDE4D;MYO18B;LGI2;COL12A1;MPPED2;RXRG;COLQ;PAG1
LEF1 (human)	45/4658	0.000218792	0.00533056	-1.36503	7.14497	CALCRL;AMY2A;COL12A1;CREM;DYSF;AKAP6;NDRG2;HDAC9;ART3;AQP1;C6ORF145;FAM134B;RGS5;PDLIM3;NNT;ZNF704;CAPN3;MBNL1;ZFHX3;ANXA1;TRPC3;KCNIP2;AMY1A;PCGF5;FAM78A;PDE4D;LGI2;PGAM2;FAM189A2;PDE4DIP;ATP1B4;SORCS1;TNNI3K;ATP1B1;COLQ;SNAP91;HIPK3;SMOC2;LRCH2;PLCXD3;DES;MPPED2;COL6A3;CFTR;DSC3
LEF1 (mouse)	22/1730	0.000413745	0.00924031	-1.53423	7.18659	GSTM3;POPDC3;GABRB2;FAM78A;COL12A1;PDE4DIP;INHBA;VTCN1;LRRC10;PLEKHA7;COLQ;ART3;CALB2;RGS5;GPR183;MPPED2;TCEA3;CAPN3;ITGB6;RXRG;CFTR;DSC3
MYB (human)	19/1409	0.000526208	0.0100731	-1.59409	7.32944	PDE4D;C5ORF4;CREM;FAM189A2;PDE4DIP;TNNI3K;SLC4A4;HDAC9;ART3;SYNE1;FAM134B;KLRK1;TDO2;NNT;ZMAT4;XIRP2;CAPN3;BLID;SCRG1
POU1F1 (human)	19/1408	0.000521757	0.0100731	-1.59237	7.32155	CALCRL;TRPC3;PDE4D;FAM189A2;TNNI3K;SLC4A4;HDAC9;MYPN;ART3;SYNE1;RGS5;KLRK1;EMCN;NNT;LIPH;MPPED2;XIRP2;ITGB6;SOX6
HIF1A (mouse)	16/1124	0.000845101	0.0150699	-1.60819	6.74643	GABRB2;SERPINF1;PRKCE;NOG;CREM;PDE4DIP;LMO7;ATP1B2;LRRC10;TBX4;TMEM163;MYPN;CNN1;ARHGAP31;TMEM117;SCRG1
CBEPB (human)	28/2598	0.000899694	0.0150699	-1.45304	6.09557	POPDC3;CALCRL;CCDC69;CREM;NDRG2;LRRC10;HDAC9;ART3;SYNE1;FAM134B;PDGFD;XIRP2;TSPAN2;SOX6;SH3BGR;KCNJ5;SLC34A2;MBNL1;TRPC3;PDE4D;PDE4DIP;LMO7;ATP1B1;MTSS1;LRCH2;MRAS;MPPED2;DSC3
TEAD2 (human)	19/1486	0.000984634	0.0155225	-1.53777	6.40554	SLC34A2;GUCY1A2;KCNIP2;FAM78A;NOG;PDE4DIP;NDRG2;TMEM163;C6ORF145;FAM134B;SMOC2;TPPP3;GATM;EEF1A2;TNNI3;TSPAN2;LRRFIP1;TGFBI;KCNJ3
FOS (human)	18/1394	0.00120531	0.0179458	-1.55383	6.24702	CPM;POPDC3;CREM;FAM189A2;LMO7;NDRG2;PLEKHA7;CALB2;TSPAN15;CNN1;FABP3;GPR183;ZNF704;MYL2;PDGFD;TNNI3;TSPAN2;TRIM54
NFIA (human)	18/1416	0.00143165	0.0194367	-1.53095	6.03286	CPM;PDE4D;PGAM2;NFATC2;C4ORF49;COLQ;SYTL3;CNN1;FABP3;DES;EMCN;TDO2;EEF1A2;MPPED2;RGN;CDH13;LPPR4;TRIM54
E2F1 (human)	39/4207	0.0014505	0.0194367	-1.32139	5.20708	CPNE5;RRAD;NPR3;CREM;DYSF;ILDR2;NDRG2;ISM1;SLC4A4;HDAC9;PTPLA;C6ORF145;SYDE2;SCUBE3;LRRFIP1;NKX2-5;PDLIM5;BVES;SH3BGR;GPR158;GUCY1A2;MBNL1;TRPC3;KCNIP2;FAM78A;PRKCE;SERPINF1;PDE4DIP;LMO7;ATP1B1;TBX4;PLEKHA7;HIPK3;MTSS1;REEP1;TPPP3;COL6A3;LPPR4;TGFBI
GATA2 (human)	76/9985	0.00161535	0.0206149	-1.51533	5.88213	AMY2A;CPNE4;DYSF;IFIT1;MYOM2;MYPN;SYNE1;SYDE2;RGS5;TDO2;RASSF4;NNT;CAPN3;ITGB6;SOX6;BVES;GUCY1A2;SLC34A2;MBNL1;TRPC3;PRKCE;PDE4D;NOG;USP2;LMO7;C4ORF49;TNNI3K;MIR133A1;MRAS;FEZ1;MYL2;EEF1A2;RGN;COL6A3;CDH13;EFHC2;CASQ1;VGLL1;CFTR;ACSS2;C5ORF4;CREM;AKAP6;VTCN1;NDRG2;SRL;LRRC10;TMEM163;HDAC9;ART3;SCUBE3;CNN1;WNT11;ZNF704;PDGFD;PAG1;GPR158;KCNJ3;CYP2J2;KCNJ5;PPP1R14C;KCNIP2;PLCL1;CADPS;PDE4DIP;COLQ;B…
FOXL1 (human)	49/5755	0.00194122	0.0236476	-1.58941	5.95152	CPM;CPNE5;CPNE4;AQP10;ISM1;IFIT1;SLC4A4;MYPN;C6ORF145;SYDE2;FAM134B;RGS5;TDO2;NNT;ZNF385D;SOX6;MBNL1;TRPC3;AMY1A;PDE4D;ATP1B1;EMCN;TXLNB;CDH13;LPPR4;CASQ1;CFTR;POPDC3;C5ORF4;CREM;ILDR2;SRL;HDAC9;CKMT2;SCUBE3;PDGFD;SH3BGR;CYP2J2;ZFHX3;PCGF5;PLCL1;CADPS;PDE4DIP;INHBA;ENOX1;REEP1;LRCH2;GATM;DES
NR3C1 (human)	19/1590	0.00212004	0.0247031	-1.40229	5.18962	GUCY1A2;AMY2A;KCNIP2;AMY1A;PDE4D;LGI2;PDE4DIP;TNNI3K;NDRG2;ATP1B1;TBX4;SLC4A4;PDLIM3;FABP3;TCEA3;CAPN3;CASQ1;GPR133;PAG1
GATA1 (human)	27/2679	0.00291146	0.0325114	-1.35336	4.63682	REG3A;NPR3;CREM;LRRC10;HDAC9;AQP1;SYNE1;KLRK1;ZMAT4;PDGFD;XIRP2;CAPN3;PDLIM5;SOX6;SH3BGR;KCNJ3;GUCY1A2;MBNL1;ZFHX3;PDE4D;CADPS;PDE4DIP;COLQ;ACTA1;LRCH2;GATM;PLCXD3
BCL6 (human)	17/1399	0.00307686	0.032984	-1.39322	4.7533	GSTM3;CPM;TRPC3;PLCL1;USP2;FAM189A2;PDE4DIP;HDAC9;PTPLA;RGS5;ACTA1;GPR183;LPPR4;BLID;BVES;TRIM54;GPR158
TP53 (human)	28/2866	0.00374289	0.0378237	-1.30237	4.26502	CALCRL;ACSS2;AMY2A;RRAD;CREM;ILDR2;NDRG2;IFIT1;LRRC10;HDAC9;MYOM2;NPPB;SCUBE3;NNT;SOX6;BVES;AMY1A;PLCL1;PDE4DIP;ATP1B2;SYTL3;HIPK3;COLQ;REEP1;TSPAN15;FABP3;RNF207;FGF18
RUNX1 (human)	35/3857	0.0038106	0.0378237	-1.25114	4.09727	CPM;CREM;AKAP6;VTCN1;IFIT1;HDAC9;MYOM2;CALB2;CKMT2;FAM134B;TDO2;MYO18B;XIRP2;SOX6;PAG1;SLC34A2;MBNL1;ANXA1;PDE4D;CADPS;LGI2;PDE4DIP;LMO7;INHBA;ATP1B1;TBX4;ENOX1;DES;MRAS;FEZ1;PKIA;TMEM117;LPPR4;TRIM54;DSC3
PRDM1 (human)	17/1468	0.00494862	0.0439802	-1.38339	4.32173	ZFHX3;PDE4D;CADPS;FAM189A2;CREM;ILDR2;PDE4DIP;LMO7;LRRC10;HDAC9;MTSS1;LPPR4;BLID;TNNI3;ZNF385D;CASQ1;GPR158
RELB (human)	17/1469	0.00498142	0.0439802	-1.36439	4.26237	GABRB2;PPP1R14C;ACSS2;RRAD;CREM;IFIT1;ATP1B1;TBX4;HDAC9;COLQ;NPPB;SMOC2;TSPAN15;FABP3;RNF207;CAPN3;CASQ1
GATA3 (human)	25/2505	0.00476432	0.0439802	-1.35963	4.2475	CPM;ACSS2;AQP10;CREM;SRL;ART3;MYOM2;FAM134B;RGS5;CNN1;NNT;KCNJ3;CYP2J2;KCNJ5;PDE4D;NOG;USP2;NFATC2;PDE4DIP;LMO7;COLQ;PLCXD3;GPR183;REN;DSC3
SND1 (human)	17/1473	0.00511441	0.0439802	-1.32901	4.15186	REG3A;SNAP25;PPP1R14C;AMY1A;PRKCE;PDE4D;FAM189A2;AKAP6;NDRG2;MYPN;COLQ;AQP1;TXLNB;LIPH;FGF18;NKX2-5;SH3BGR
HNF4A (human)	22/2127	0.00541548	0.0439802	-1.28873	4.02601	SLC34A2;CPM;POPDC3;GABRB2;MBNL1;FAM78A;DYSF;PDE4DIP;NDRG2;ART3;SYNE1;CALB2;C6ORF145;SMOC2;FABP3;EMCN;TXLNB;PKIA;COL6A3;CDH13;EFHC2;NKX2-5
YY1 (human)	49/6042	0.00531401	0.0439802	-1.28832	4.02474	DYSF;SLC4A4;MYPN;SYNE1;C6ORF145;FAM134B;NNT;ZNF385D;ITGB6;SOX6;BVES;SLC34A2;ANXA1;SERPINF1;PDE4D;NOG;ATP1B4;TNNI3K;MIR133A1;MRAS;RNF207;EEF1A2;MPPED2;CDH13;CFTR;POPDC3;PARM1;RRAD;CREM;AKAP6;HDAC9;ART3;CNN1;KLRK1;ZNF704;XIRP2;NKX2-5;RXRG;PAG1;SH3BGR;KCNIP2;FAM189A2;PDE4DIP;ENOX1;REEP1;PLCXD3;PKIA;FGF18;SCRG1
HMGA1 (mouse)	19/1748	0.00584454	0.0460687	-1.26186	3.88351	CALCRL;CPNE4;PDE4D;CREM;DYSF;ATP1B4;ILDR2;PDE4DIP;AKAP6;ATP1B1;TMEM163;TBX4;COLQ;GPR183;PKIA;LIPH;MPPED2;GPR158;DSC3
SRY (human)	8/469	0.00624154	0.0477924	-1.62521	4.94209	SYDE2;REG3A;GUCY1A2;KLRK1;CPNE5;ATP1B4;PDE4DIP;EFHC2
CREB1 (human)	26/2749	0.0079006	0.0588155	-1.18849	3.36741	SNAP25;AMY2A;CREM;AKAP6;SRL;ISM1;SLC4A4;ART3;CNN1;KLRK1;CAPN3;XIRP2;SOX6;BVES;GSTM3;MBNL1;KCNIP2;FAM78A;PDE4D;SERPINF1;USP2;FAM189A2;SNAP91;SMOC2;FABP3;EMCN
CEBPB (human)	16/1420	0.00814743	0.0590138	-1.28589	3.63904	GABRB2;CREM;PLEKHA7;C6ORF145;TSPAN15;PLCXD3;FABP3;DES;GPR183;MYL2;PDGFD;TNNI3;TSPAN2;TRIM54;PAG1;CFTR
HINFP (human)	28/3047	0.00849204	0.0598912	-1.1284	3.17669	SNAP25;RRAD;CREM;ISM1;HDAC9;ART3;MYOM2;AQP1;SYDE2;LRRFIP1;CYP2J2;TRPC3;FAM78A;PDE4D;PRKCE;SERPINF1;FAM189A2;PDE4DIP;TNNI3K;COLQ;PLEKHA7;ENOX1;TPPP3;DES;COL6A3;EFHC2;VGLL1;SCRG1
SOX10 (human)	4/139	0.00923383	0.0600416	-1.37259	3.8607	C6ORF145;PDE4D;DYSF;VTCN1
SMAD3 (mouse)	1972-03-01	0.00911588	0.0600416	-1.31142	3.68866	POPDC3;NFATC2;BICC1
MAPK14 (human)	14/1190	0.00923273	0.0600416	-1.28283	3.60824	CPM;AMY2A;CPNE4;PDE4D;CREM;ATP1B4;VTCN1;ATP1B2;SNAP91;MYOM2;ARHGAP31;KLRK1;ZMAT4;DSC3
GATA6 (human)	16/1447	0.00963354	0.0600416	-1.19867	3.37151	PLCL1;PDE4D;CREM;PDE4DIP;AKAP6;TNNI3K;LRRC10;HDAC9;RGS5;LRCH2;PLCXD3;ZMAT4;XIRP2;REN;SOX6;CFTR
POU2F2 (human)	26/2792	0.00955763	0.0600416	-1.12296	3.15857	CCDC69;AKAP6;IFIT1;LRRC10;HDAC9;FAM134B;RGS5;TDO2;RASSF4;PDGFD;XIRP2;CAPN3;PDLIM5;SOX6;GPR133;GSTM3;PDE4D;PDE4DIP;ATP1B4;LMO7;TNNI3K;PLEKHA7;ENOX1;EMCN;GPR183;CDH13
NR5A2 (human)	33/3815	0.0101677	0.0619307	-1.00608	2.79864	GABRB2;ACSS2;AMY2A;RRAD;NPR3;CREM;DYSF;VTCN1;HDAC9;SYNE1;CALB2;C6ORF145;RGS5;CAPN3;TNNI3;LRRFIP1;NKX2-5;BVES;GPR133;RXRG;CADPS;LGI2;FAM189A2;PDE4DIP;SNAP91;COLQ;TSPAN15;FABP3;RNF207;RGN;BLID;TGFBI;TRIM54
HNF1A (human)	19/1855	0.0106236	0.0632693	-1.14781	3.16836	MBNL1;CCDC69;CREM;FAM189A2;NDRG2;HIPK3;PLEKHA7;SYNE1;C6ORF145;SYDE2;ACTA1;NNT;ZMAT4;MYL2;COL6A3;ZNF385D;SCRG1;SH3BGR;CFTR
Gata1 (mouse)	19/1863	0.0110801	0.0638506	-1.0873	2.99138	SERPINF1;CREM;PDE4DIP;VTCN1;IFIT1;TBX4;SYTL3;BICC1;ART3;NPPB;RGS5;TDO2;RASSF4;PKIA;ZMAT4;LIPH;TSPAN2;PDLIM5;DSC3
NFYA (human)	24/2549	0.0112569	0.0638506	-1.07351	2.95346	MBNL1;ANXA1;CPNE4;PDE4D;CADPS;USP2;PDE4DIP;LMO7;IFIT1;LRRC10;SLC4A4;MTSS1;CKMT2;REEP1;MRAS;TDO2;PKIA;PDGFD;SOX6;VGLL1;TRIM54;PAG1;KCNJ3;DSC3
JUN (human)	27/2976	0.0114359	0.0638506	-1.02369	2.81637	CPM;POPDC3;GABRB2;AMY2A;CREM;VTCN1;NDRG2;SLC4A4;AQP1;CNN1;PDGFD;XIRP2;TNNI3;LMO7;COLQ;PLEKHA7;TSPAN15;PLCXD3;FABP3;EMCN;GPR183;MYL2;COL6A3;BLID;TGFBI;TRIM54;CFTR
E2F6 (human)	15/1358	0.0121705	0.066064	-1.10806	3.01076	GABRB2;FAM78A;PRKCE;NPR3;SLC4A4;PLEKHA7;MYOM2;REEP1;SMOC2;FABP3;DES;EEF1A2;TNNI3;LRRFIP1;BVES
MIB2 (human)	16/1490	0.0124395	0.066064	-1.06211	2.88589	GABRB2;PPP1R14C;ACSS2;CPNE4;FAM78A;PRKCE;PDE4D;NPR3;C5ORF4;DYSF;PLEKHA7;CNN1;EEF1A2;CAPN3;TNNI3;NKX2-5
POU1F1 (mouse)	18/1754	0.0125719	0.066064	-1.05334	2.86207	KCNJ5;CALCRL;ACSS2;PRKCE;LGI2;DYSF;ILDR2;VTCN1;MYPN;CKMT2;CNN1;RGS5;GATM;EMCN;TMEM117;PDLIM5;RXRG;GPR158
TCFAP2A (human)	15/1367	0.0128535	0.0662449	-1.11087	3.01534	ZFHX3;CPNE5;FAM78A;PRKCE;ILDR2;SORCS1;ISM1;ATP1B1;HDAC9;HIPK3;WNT11;EEF1A2;LRRFIP1;BVES;GPR158
JUND (mouse)	18/1764	0.0132531	0.0670158	-1.03103	2.78671	ANXA1;CALCRL;LGI2;CREM;NFATC2;ILDR2;INHBA;VTCN1;SNAP91;CNN1;KAT2B;LRCH2;DES;TDO2;TNNI3;SOX6;VGLL1;CFTR
LOC135440 (human)	5/247	0.0150068	0.0744784	-1.18973	3.09003	CKMT2;SNAP25;USP2;PDLIM5;HDAC9
SMARCA2 (human)	16/1536	0.0161172	0.0785347	-1.10799	2.81897	PPP1R14C;AMY2A;RRAD;CADPS;CREM;PDE4DIP;TNNI3K;LRRC10;MTSS1;LRCH2;TDO2;ZNF704;EEF1A2;CAPN3;TGFBI;CFTR
ZBTB16 (human)	16/1572	0.0195454	0.0935386	-1.04366	2.47283	CCDC69;CREM;FAM189A2;TNNI3K;SLC4A4;HDAC9;HIPK3;PLEKHA7;ACTA1;FABP3;TDO2;PDGFD;CAPN3;CDH13;LPPR4;PDLIM5
IRF7 (human)	1999-03-01	0.0207432	0.0975297	-1.00722	2.3444	ZNF704;SYTL3;SYNE1
RUNX2 (human)	15/1458	0.0215708	0.0995928	-1.04144	2.40226	ACSS2;RRAD;USP2;PRSS23;COLQ;ENOX1;SYNE1;PDLIM3;KLRK1;RASSF4;COL6A3;CDH13;SOX6;VGLL1;CFTR
STAT5B (mouse)	17/1729	0.0219253	0.0995928	-0.928506	2.14175	ANXA1;CPNE4;ATP1B4;PDE4DIP;TBX4;ART3;PLEKHA7;HIPK3;AQP1;SYNE1;CALB2;GATM;FABP3;PKIA;TNNI3;PDLIM5;CFTR
TFAP2A (human)	30/3613	0.0239236	0.106859	-1.00402	2.24523	ACSS2;CPNE5;RRAD;NPR3;DYSF;ILDR2;NDRG2;ISM1;SLC4A4;AQP1;SCUBE3;CNN1;TNNI3;LRRFIP1;KCNJ5;FAM78A;PRKCE;NOG;SORCS1;ATP1B1;TBX4;ENOX1;ACTA1;KAT2B;FABP3;TPPP3;TMEM117;EEF1A2;TGFBI;TRIM54
TEAD4 (human)	14/1354	0.025083	0.110201	-0.955901	2.1082	SNAP25;KCNIP2;FAM78A;NOG;NFATC2;ATP1B1;NDRG2;PLEKHA7;C6ORF145;DES;RASSF4;EEF1A2;CAPN3;LRRFIP1
NFIC (human)	35/4403	0.026628	0.115102	-0.947916	2.04934	GABRB2;CALCRL;CREM;DYSF;IFIT1;LRRC10;SLC4A4;CKMT2;FAM134B;CNN1;TDO2;ZNF704;LRRFIP1;NKX2-5;SH3BGR;PAG1;ANXA1;PDE4D;CADPS;PGAM2;FAM189A2;ATP1B4;LMO7;SORCS1;ATP1B1;COLQ;MTSS1;GATM;TPPP3;MRAS;PKIA;VGLL1;SCRG1;TRIM54;DSC3
HNRNPK (human)	1943-02-01	0.0272819	0.116056	-0.146485	0.315481	ZFHX3;MYO18B
NFAT2 (human)	14/1376	0.0282149	0.11815	-0.944545	2.01736	GABRB2;CALCRL;PDE4D;PDE4DIP;PALM2-AKAP2;HDAC9;FAM134B;LRCH2;REN;TSPAN2;GPR133;SCRG1;TRIM54;RXRG
SP3 (mouse)	12/1129	0.0307577	0.126816	-0.937971	1.93692	SCUBE3;SLC34A2;ACSS2;TRPC3;CPNE4;FEZ1;RGN;TNNI3;PDLIM5;TBX4;SYNE1;KCNJ3
CRTC3 (human)	11/1008	0.0322098	0.130791	-0.994195	2.02234	CNN1;LRCH2;ANXA1;TRPC3;RASSF4;CREM;CDH13;PDE4DIP;LMO7;SLC4A4;HDAC9
MZF1_5-13 (human)	5/316	0.0373249	0.137264	-1.12888	2.24178	SNAP25;PPP1R14C;TRPC3;CDH13;THBS1
CBFB (human)	9/774	0.0360789	0.137264	-1.00047	1.98678	C6ORF145;CPM;ZFHX3;MYO18B;CREM;PDE4DIP;LPPR4;SYTL3;ENOX1
Pdx1 (mouse)	10/907	0.0379013	0.137264	-0.987963	1.96194	CNN1;KCNJ5;SLC34A2;PDLIM3;LRCH2;PARM1;KLRK1;ITGB6;BVES;SYNE1
HOXA5 (human)	25/3000	0.0371233	0.137264	-0.98772	1.96146	POPDC3;C5ORF4;CREM;ILDR2;SLC4A4;MYPN;SYNE1;C6ORF145;KLRK1;TDO2;PDLIM5;SH3BGR;PAG1;KCNIP2;AMY1A;PDE4D;NFATC2;PDE4DIP;BICC1;ACTA1;ARHGAP31;MRAS;MPPED2;EFHC2;CASQ1
RORB (human)	11/1035	0.0377955	0.137264	-0.898079	1.78345	KAT2B;PLCL1;ZMAT4;PDE4D;CAPN3;LRRFIP1;ATP1B2;PRSS23;COLQ;CFTR;AQP1
ETS1 (human)	37/4827	0.0369851	0.137264	-0.841766	1.67162	GABRB2;NPR3;ILDR2;NDRG2;THBS1;PRSS23;HDAC9;AQP1;CALB2;WNT11;MYO18B;XIRP2;CAPN3;LRRFIP1;ZNF385D;BVES;PAG1;AMY1A;PRKCE;PLCL1;PDE4D;LGI2;PGAM2;FAM189A2;PDE4DIP;LMO7;COLQ;BICC1;SMOC2;FABP3;DES;TXLNB;GPR183;MPPED2;COL6A3;TGFBI;VGLL1
NFKB1 (mouse)	27/3284	0.0354632	0.137264	-0.690842	1.37191	RRAD;NDRG2;IFIT1;ISM1;AQP1;FAM134B;LRRFIP1;PDLIM5;BVES;GPR158;PAG1;KCNJ5;ZFHX3;PCGF5;LGI2;USP2;NFATC2;ATP1B1;TBX4;BICC1;SNAP91;PLEKHA7;HIPK3;ENOX1;TCEA3;FGF18;TRIM54
TBX5 (human)	1951-02-01	0.0368714	0.137264	-0.140112	0.278242	EEF1A2;CASQ1
PGR (human)	14/1447	0.0403019	0.144012	-0.794926	1.54045	SLC34A2;MBNL1;AMY2A;FAM189A2;PDE4DIP;AKAP6;HDAC9;HIPK3;CALB2;ZNF704;MPPED2;VGLL1;TRIM54;PAG1
KLF13 (human)	14/1453	0.0414707	0.144654	-0.774791	1.49799	GSTM3;ACSS2;TRPC3;KCNIP2;NOG;COL12A1;USP2;DYSF;ATP1B4;SORCS1;HDAC9;ARHGAP31;CDH13;CFTR
TEAD2 (mouse)	15/1591	0.041561	0.144654	-0.76957	1.48789	PARM1;CPNE5;KCNIP2;PRKCE;NOG;NFATC2;ILDR2;NDRG2;TBX4;SYTL3;SYNE1;SCUBE3;ADAMTS15;TCEA3;KCNJ3
NR2F1 (human)	11/1073	0.046763	0.152835	-0.795772	1.49477	KAT2B;PLCL1;ZMAT4;PDE4D;CAPN3;LRRFIP1;ATP1B2;PRSS23;COLQ;CFTR;AQP1
THRB (human)	18/2034	0.0453023	0.152835	-0.706428	1.32695	CYP2J2;CPM;PRKCE;DYSF;NFATC2;ATP1B1;TMEM163;SLC4A4;HDAC9;SYTL3;MYOM2;NPPB;GATM;PDLIM3;RASSF4;LIPH;FEZ1;MYL2
ETS2 (human)	13/1341	0.0466207	0.152835	-0.688207	1.29272	GABRB2;CALCRL;TRPC3;KCNIP2;PDE4D;PTPLA;SYNE1;FAM134B;PKIA;MPPED2;CDH13;SCRG1;CFTR
EGR1 (mouse)	15/1617	0.0466606	0.152835	-0.676736	1.27118	GABRB2;MBNL1;RRAD;CREM;PDE4DIP;VTCN1;ISM1;SLC4A4;RGS5;WNT11;DES;TMEM117;MPPED2;TSPAN2;LRRFIP1
IRF9 (human)	1957-02-01	0.044784	0.152835	-0.0418563	0.0786227	EMCN;IFIT1
MIR138 (human)	13/1356	0.0500811	0.161708	-0.725925	1.32261	SLC34A2;GABRB2;PPP1R14C;PGAM2;TNNI3K;HDAC9;PRSS23;SYNE1;AQP1;CKMT2;FABP3;FGF18;MPPED2
LTF (human)	13/1363	0.0517555	0.165125	-0.679305	1.22346	MBNL1;DYSF;FAM189A2;LMO7;SRL;CNN1;DES;LIPH;MYL2;XIRP2;TNNI3;BLID;TGFBI
REL (human)	5/353	0.0548624	0.169794	-0.860133	1.52516	EMCN;RRAD;IFIT1;BVES;SH3BGR
RELA (mouse)	15/1656	0.0551197	0.169794	-0.576179	1.02166	CPM;SNAP25;KCNJ5;CPNE4;NOG;DYSF;NFATC2;ISM1;TBX4;NPPB;FAM134B;PDLIM3;NNT;TCEA3;EEF1A2
CACYBP (mouse)	15/1656	0.0551197	0.169794	-0.56997	1.01065	GSTM3;SLC34A2;LGI2;ATP1B4;NDRG2;IFIT1;SLC4A4;BICC1;NPPB;PLCXD3;RNF207;FEZ1;CDH13;CAPN3;GPR133
TFAP2A (mouse)	15/1663	0.0567439	0.170869	-0.562017	0.993002	PDE4DIP;NFATC2;NDRG2;TMEM163;MYOM2;SYNE1;SCUBE3;CNN1;ACTA1;LRCH2;DES;MYL2;LRRFIP1;BVES;PAG1
NFE2 (human)	22/2681	0.056544	0.170869	-0.512993	0.906385	MBNL1;PLCL1;NOG;CREM;DYSF;SORCS1;NDRG2;HDAC9;MYPN;MYOM2;AQP1;C6ORF145;RGS5;CNN1;KLRK1;RASSF4;ZNF704;EEF1A2;BLID;CASQ1;TGFBI;TRIM54
ZNF281 (human)	10/986	0.0597948	0.172243	-0.682746	1.20085	SCUBE3;ZFHX3;TPPP3;FAM78A;RASSF4;EEF1A2;TSPAN2;LRRFIP1;EFHC2;NDRG2
NKX2-8 (human)	4/256	0.0621659	0.172243	-0.618111	1.08716	SMOC2;FAM78A;PDE4DIP;ENOX1
NR5A1 (human)	13/1389	0.0583124	0.172243	-0.600853	1.05681	GSTM3;GABRB2;ACSS2;AMY2A;CREM;PDE4DIP;TMEM163;COLQ;SYNE1;CALB2;TXLNB;GPR183;LRRFIP1
SMAD4 (human)	14/1542	0.0617396	0.172243	-0.580421	1.02087	AMY2A;CPNE4;CREM;FAM189A2;PDE4DIP;IFIT1;COLQ;PTPLA;RGS5;FABP3;PDGFD;MPPED2;CAPN3;TNNI3
ETV4 (human)	13/1403	0.0620673	0.172243	-0.53426	0.939684	SLC34A2;KCNIP2;PGAM2;AKAP6;VTCN1;TBX4;AQP1;SCUBE3;PDLIM3;PKIA;PDGFD;CAPN3;CFTR
SPI1 (mouse)	15/1680	0.0608259	0.172243	-0.518113	0.911283	ANXA1;CPNE4;CADPS;ATP1B2;VTCN1;COLQ;SYTL3;SCUBE3;RGS5;FAM134B;WNT11;ZMAT4;MYL2;FEZ1;CFTR
MYOG (human)	13/1404	0.0623416	0.172243	-0.515119	0.906017	SLC34A2;REG3A;GUCY1A2;KCNIP2;PCGF5;PDE4D;DYSF;TNNI3K;PLEKHA7;SCUBE3;KLRK1;NNT;GPR158
ETS1 (mouse)	15/1681	0.0610722	0.172243	-0.497121	0.874361	ZFHX3;SORCS1;TNNI3K;ATP1B1;SRL;HDAC9;HIPK3;SYTL3;PTPLA;CALB2;CNN1;ADAMTS15;WNT11;TNNI3;ITGB6
MIR210 (human)	1970-02-01	0.063797	0.174465	0.190595	-0.332784	NDRG2;GPR133
IRF2 (human)	13/1412	0.0645653	0.174783	-0.504133	0.879315	MBNL1;TRPC3;CADPS;CREM;VTCN1;SLC4A4;COLQ;SYNE1;GATM;NNT;MYL2;PDGFD;REN
SAMD9L (human)	13/1415	0.0654127	0.175306	-0.500063	0.87072	CPM;GABRB2;PARM1;ACSS2;RRAD;THBS1;REEP1;DES;TMEM117;MYL2;MYO18B;CAPN3;TGFBI
Sox17 (mouse)	6/500	0.0705916	0.187312	-0.650062	1.08884	CPM;ACSS2;MYL2;FGF18;MYO18B;XIRP2
STAT3 (human)	22/2759	0.0722638	0.18987	-0.312751	0.519611	MBNL1;PARM1;PDE4D;NPR3;FAM189A2;PDE4DIP;ATP1B4;HDAC9;HIPK3;MTSS1;ENOX1;AQP1;GATM;PLCXD3;FABP3;NNT;PDGFD;MPPED2;XIRP2;CDH13;NKX2-5;CFTR
ELK1 (mouse)	15/1727	0.0731466	0.190323	-0.365671	0.606659	KCNJ5;KCNIP2;CCDC69;LMO7;ISM1;BICC1;MTSS1;HIPK3;SYTL3;KAT2B;TPPP3;GATM;TGFBI;SOX6;RXRG
KLF5 (human)	13/1445	0.0742971	0.191458	-0.433162	0.716055	KCNIP2;FAM78A;NPR3;USP2;NDRG2;ISM1;ATP1B1;C6ORF145;PDLIM3;TCEA3;EEF1A2;LRRFIP1;PDLIM5
ELK4 (human)	13/1453	0.0767933	0.196006	-0.436556	0.711417	CALCRL;PARM1;AQP10;PLCL1;PDE4D;CREM;PDE4DIP;MYPN;HIPK3;FAM134B;PDLIM3;CAPN3;SCRG1
RUNX2 (mouse)	15/1750	0.0797425	0.201613	-0.33283	0.532995	GSTM3;ANXA1;PCGF5;SERPINF1;CREM;PDE4DIP;ATP1B2;MYPN;AQP1;SYNE1;SYDE2;NNT;PKIA;TGFBI;VGLL1
SP1 (mouse)	19/2360	0.0850181	0.212943	-0.284667	0.440303	CPM;ZFHX3;ACSS2;CPNE5;FAM78A;RRAD;PRKCE;NFATC2;SNAP91;BICC1;CALB2;FAM134B;TPPP3;NNT;TCEA3;MPPED2;FGF18;LRRFIP1;PAG1
FOXJ1 (human)	13/1484	0.0869774	0.215833	-0.376545	0.577338	SERPINF1;USP2;CREM;VTCN1;LRRC10;HDAC9;ENOX1;SYNE1;TSPAN15;EMCN;RGN;CAPN3;VGLL1
SPI1 (human)	14/1638	0.090192	0.219496	-0.42188	0.639748	SLC34A2;PARM1;KCNIP2;PDE4D;PGAM2;FAM189A2;NDRG2;LRRC10;AQP1;KAT2B;TXLNB;MYO18B;CAPN3;CASQ1
CEBPD (human)	13/1495	0.0907876	0.219496	-0.360394	0.546509	MBNL1;PDE4DIP;SRL;LRRC10;HIPK3;C6ORF145;REEP1;CNN1;TPPP3;RNF207;TCEA3;PDLIM5;TRIM54
FOXF1 (human)	12/1352	0.0909106	0.219496	-0.359784	0.545585	REG3A;PDLIM3;ZFHX3;CALCRL;AMY2A;TXLNB;LIPH;FEZ1;PKIA;FAM189A2;IFIT1;MYPN
Lhx3 (mouse)	2016-01-01	0.0927126	0.221848	5.6686	-8.53556	MYOM2
USF1 (mouse)	11/1219	0.0943696	0.223815	-0.318062	0.476118	CKMT2;SNAP25;LRCH2;EMCN;KCNIP2;LIPH;NFATC2;TGFBI;TBX4;RXRG;SYTL3
CBEPA (human)	12/1366	0.0961824	0.224872	-0.30967	0.462097	FABP3;PKIA;PDGFD;CADPS;CREM;TNNI3;ITGB6;INHBA;RXRG;PLEKHA7;GPR158;AQP1
USF2 (human)	28/3792	0.0964934	0.224872	-0.0812861	0.121297	ACSS2;AMY2A;CREM;IFIT1;PALM2-AKAP2;SYNE1;CKMT2;FAM134B;LRRFIP1;GUCY1A2;MBNL1;TRPC3;PDE4D;SERPINF1;PGAM2;NFATC2;C4ORF49;TBX4;SNAP91;COLQ;MTSS1;KAT2B;FABP3;MRAS;MYL2;FGF18;BLID;TGFBI
Pax2 (mouse)	13/1516	0.098349	0.22722	-0.405744	0.601246	TRPC3;PGAM2;DYSF;NFATC2;ATP1B4;AKAP6;REEP1;SCUBE3;RGS5;LRCH2;NNT;MYL2;VGLL1
STAT5B (human)	12/1379	0.101242	0.231905	-0.2752	0.402184	C6ORF145;CPM;PARM1;EMCN;PDE4D;NPR3;PDE4DIP;HDAC9;SYTL3;COLQ;HIPK3;ENOX1
RBPJ (human)	13/1535	0.105516	0.239528	-0.258576	0.369528	CPNE5;AQP10;PDE4D;NPR3;IFIT1;LRRC10;FAM134B;KAT2B;SMOC2;PLCXD3;TXLNB;LPPR4;REN
SREBF1 (human)	20/2587	0.106358	0.239528	-0.131385	0.18776	KCNJ5;SLC34A2;ACSS2;PDE4D;SERPINF1;CREM;PALM2-AKAP2;SYTL3;SYNE1;CKMT2;CALB2;REEP1;SYDE2;CNN1;FABP3;TMEM117;COL6A3;LRRFIP1;TGFBI;RXRG
HOXD9 (human)	13/1543	0.108625	0.241249	-0.207383	0.294883	REG3A;AMY2A;C5ORF4;CREM;FAM189A2;PDE4DIP;NFATC2;AKAP6;COLQ;SMOC2;WNT11;NKX2-5;VGLL1
ATF4 (human)	12/1398	0.108922	0.241249	-0.203864	0.289879	REEP1;FAM134B;SNAP25;FABP3;CALCRL;PCGF5;PDE4D;CREM;XIRP2;CAPN3;CDH13;LPPR4
SMAD4 (mouse)	13/1580	0.123717	0.271772	-0.148291	0.193193	ZFHX3;MBNL1;PRKCE;COL12A1;CREM;VTCN1;SLC4A4;SNAP91;SCUBE3;FAM134B;MRAS;TMEM117;FGF18
MTF1 (human)	12/1440	0.127091	0.276914	-0.212897	0.273371	SLC34A2;TPPP3;FABP3;CPNE5;FAM78A;PRKCE;PLCL1;TCEA3;COL12A1;USP2;PALM2-AKAP2;PLEKHA7
FOXI1 (human)	3/217	0.131545	0.284307	-0.287113	0.361102	TRPC3;BLID;HDAC9
REL (mouse)	14/1752	0.133325	0.28585	-0.10309	0.129099	KCNJ5;SNAP25;RRAD;PRKCE;NFATC2;ATP1B1;KAT2B;EMCN;RASSF4;TSPAN2;LRRFIP1;TGFBI;SOX6;RXRG
NR5A1 (mouse)	9/1020	0.135143	0.287447	-0.191517	0.238767	KAT2B;TSPAN15;SERPINF1;MYL2;PGAM2;PDE4DIP;SH3BGR;ART3;SYTL3
Stat3 (mouse)	14/1762	0.137592	0.290352	-0.0736245	0.0910487	CALCRL;ATP1B4;SRL;AQP1;CKMT2;FAM134B;KAT2B;GATM;LRCH2;GPR183;RGN;EFHC2;RXRG;GPR158
REPIN1 (human)	12/1466	0.139149	0.291343	-0.135899	0.167598	CALB2;C6ORF145;SNAP25;FAM78A;PRKCE;RNF207;USP2;SORCS1;TRIM54;THBS1;KCNJ3;SYNE1
NR3C1 (mouse)	14/1775	0.143253	0.29761	-0.0867139	0.105095	REG3A;ANXA1;PGAM2;NPR3;DYSF;AKAP6;TNNI3K;IFIT1;SYTL3;TSPAN15;KAT2B;ZMAT4;CAPN3;TRIM54
NFATC3 (human)	2/116	0.145989	0.300963	0.269234	-0.323287	NPPB;TRPC3
JDP2 (human)	12/1488	0.149825	0.306512	-0.0919557	0.108737	CALB2;NPPB;AMY1A;RRAD;GPR183;PKIA;CREM;COL6A3;CAPN3;TNNI3K;LRRC10;BVES
BRCA1 (human)	14/1809	0.158657	0.319701	-0.220804	0.251798	SLC34A2;CPNE4;FAM78A;PDE4D;CADPS;CREM;ATP1B1;REEP1;MYO18B;ZNF385D;EFHC2;LRRFIP1;ITGB6;SH3BGR
GTF2I (human)	3/237	0.15804	0.319701	-0.148319	0.169139	ACTA1;REG3A;HDAC9
SREBF2 (human)	11/1361	0.161558	0.321041	-0.0535644	0.0608592	NPPB;FABP3;MYL2;MYO18B;EEF1A2;RGN;PDE4DIP;TNNI3;TGFBI;CASQ1;ISM1
TBX5 (mouse)	13/1663	0.161718	0.321041	0.010398	-0.011814	ZFHX3;CPNE5;NFATC2;LRRC10;TMEM163;COLQ;PTPLA;TPPP3;EMCN;MYL2;TCEA3;CAPN3;TGFBI
MYOG (mouse)	13/1675	0.16767	0.330409	0.0536308	-0.059392	GSTM3;PCGF5;NPR3;DYSF;NFATC2;THBS1;REEP1;ADAMTS15;DES;MYO18B;FGF18;LRRFIP1;NKX2-5
HMGA1 (human)	11/1379	0.17148	0.33545	-0.0322393	0.0352144	PLCXD3;ZFHX3;CALCRL;PDE4D;FAM189A2;COL6A3;PDE4DIP;ITGB6;TNNI3K;SOX6;SYNE1
AHR (human)	11/1391	0.178258	0.343691	-0.0221566	0.0236636	FABP3;FAM78A;DYSF;CAPN3;ZNF385D;TGFBI;NDRG2;PALM2-AKAP2;HIPK3;PAG1;GPR158
MZF1 (human)	11/1389	0.177119	0.343691	0.0103223	-0.0110243	FABP3;TRPC3;TCEA3;ILDR2;CASQ1;TGFBI;NDRG2;NKX2-5;RXRG;MYOM2;SYNE1
CREM (human)	6/662	0.183434	0.346199	-0.0608233	0.0645178	CALCRL;PRKCE;COL12A1;FGF18;CAPN3;PALM2-AKAP2
IRF8 (human)	12/1550	0.182153	0.346199	0.0435136	-0.0461566	FABP3;ZFHX3;ACSS2;NNT;PDE4D;C5ORF4;CREM;TSPAN2;CASQ1;IFIT1;ENOX1;DSC3
FOXA1 (mouse)	13/1705	0.183033	0.346199	0.0473188	-0.050193	POPDC3;GUCY1A2;TRPC3;PCGF5;USP2;ILDR2;PDE4DIP;IFIT1;SYNE1;TSPAN15;KAT2B;CDH13;CAPN3
SP1 (human)	11/1406	0.186908	0.350289	0.04882	-0.051212	C6ORF145;SNAP25;CPNE5;KCNIP2;FAM78A;PRKCE;EEF1A2;CREM;LRRFIP1;NDRG2;ATP1B1
Arnt (mouse)	2/139	0.192422	0.358118	0.324875	-0.333612	MYL2;CAPN3
ATF1 (human)	3/264	0.196095	0.362437	0.0146395	-0.0148577	C6ORF145;GPR183;CAPN3
Nkx3-2 (mouse)	9/1122	0.198511	0.364391	-0.00249932	0.00252313	GABRB2;ACTA1;ARHGAP31;EMCN;CREM;XIRP2;CASQ1;HIPK3;SYTL3
HIF1A (human)	12/1586	0.202355	0.36892	0.0997153	-0.0994337	CALB2;NPPB;CPNE5;TXLNB;PCGF5;CCDC69;LIPH;USP2;FAM189A2;IFIT1;HDAC9;SYNE1
THRA (human)	3/271	0.20631	0.373588	0.0573055	-0.0564232	ACTA1;ATP1B2;LRRFIP1
ARNT (human)	10/1303	0.217861	0.38033	0.119774	-0.115787	REEP1;SNAP25;SMOC2;SCUBE3;MYL2;RNF207;LRRFIP1;NDRG2;GPR133;KCNJ3
MYC (human)	10/1302	0.217201	0.38033	0.13325	-0.128814	CKMT2;FAM134B;FABP3;MRAS;AMY2A;MYL2;PDE4D;XIRP2;PALM2-AKAP2;TBX4
FOXA1 (human)	11/1457	0.217725	0.38033	0.164752	-0.159269	CYP2J2;PDLIM3;ZFHX3;TRPC3;ZNF704;LIPH;FEZ1;PDE4D;C5ORF4;MYPN;SYNE1
IRF8 (mouse)	13/1770	0.218548	0.38033	0.273334	-0.264236	CPM;CALCRL;NFATC2;ATP1B4;NDRG2;IFIT1;MYOM2;CKMT2;FAM134B;KLRK1;XIRP2;LRRFIP1;ITGB6
PITX2 (human)	24/3528	0.216736	0.38033	0.355635	-0.343798	CPM;REG3A;MBNL1;TRPC3;PDE4D;C5ORF4;FAM189A2;CREM;SORCS1;ATP1B2;LRRC10;SLC4A4;ART3;PTPLA;AQP1;CKMT2;ARHGAP31;RGN;CAPN3;SOX6;PDLIM5;VGLL1;SH3BGR;KCNJ3
MYCN (human)	1942-01-01	0.218247	0.38033	3.2144	-3.10742	EEF1A2
ETV4 (mouse)	13/1773	0.220256	0.38083	0.275525	-0.265992	CALCRL;PRKCE;USP2;DYSF;HDAC9;SLC4A4;PTPLA;NNT;MYL2;CAPN3;PDLIM5;SOX6;CFTR
RORB (mouse)	8/1020	0.234317	0.395236	0.230812	-0.214256	GSTM3;FAM189A2;LRRFIP1;ITGB6;GPR158;SYTL3;MTSS1;SYNE1
NR2F1 (mouse)	8/1021	0.235094	0.395236	0.232138	-0.215488	GSTM3;FAM189A2;LRRFIP1;ITGB6;GPR158;SYTL3;MTSS1;SYNE1
ELF3 (human)	11/1488	0.237437	0.395236	0.329613	-0.305971	FAM134B;RGS5;ZFHX3;LIPH;TCEA3;MPPED2;CAPN3;PDE4DIP;SORCS1;TGFBI;AQP1
NFATC3 (mouse)	13/1801	0.236474	0.395236	0.343036	-0.318431	PRKCE;CADPS;PDE4DIP;HDAC9;HIPK3;SYTL3;AQP1;LRCH2;MYL2;MPPED2;PDLIM5;TRIM54;GPR158
TAL1::TCF3 (human)	1945-01-01	0.231572	0.395236	2.62728	-2.43883	SRL
NME2 (human)	1945-01-01	0.231572	0.395236	3.01133	-2.79533	NPR3
UBTF (human)	11/1493	0.24068	0.395718	0.321713	-0.298244	REEP1;GABRB2;PDGFD;CADPS;LGI2;DYSF;CAPN3;AKAP6;C4ORF49;NDRG2;SYNE1
POU3F1 (human)	2/162	0.240448	0.395718	0.499898	-0.463431	EMCN;BLID
Klf4 (mouse)	2/163	0.242554	0.396369	0.496322	-0.459302	TRPC3;NNT
CACYBP (human)	10/1350	0.249772	0.40569	0.334389	-0.301674	SNAP25;FABP3;ACSS2;RRAD;FAM78A;NOG;EEF1A2;ATP1B2;NDRG2;PRSS23
MYOD1 (mouse)	12/1672	0.254365	0.410661	0.418393	-0.372364	POPDC3;SNAP25;NNT;PLCL1;CCDC69;USP2;COL12A1;PDE4DIP;LRRFIP1;NKX2-5;AQP1;PTPLA
PCBP1 (human)	10/1360	0.25677	0.410851	0.348791	-0.310258	C6ORF145;CPNE5;KCNIP2;FAM78A;RASSF4;PRKCE;CREM;LRRFIP1;ATP1B1;NDRG2
ESR2 (mouse)	1951-01-01	0.257549	0.410851	2.98904	-2.65882	SCUBE3
NR1H3 (human)	10/1385	0.274552	0.435385	0.380388	-0.316303	TSPAN15;RNF207;SERPINF1;C5ORF4;CAPN3;C4ORF49;SLC4A4;PLEKHA7;PTPLA;ENOX1
Prrx2 (mouse)	15/2205	0.285214	0.444403	0.383233	-0.310811	CPM;GUCY1A2;PARM1;PRKCE;CADPS;AKAP6;HDAC9;TBX4;MYOM2;SYNE1;KLRK1;SOX6;NKX2-5;GPR133;GPR158
AP1 (mouse)	2/183	0.284759	0.444403	0.528327	-0.428486	LIPH;PDE4DIP
WT1 (human)	18/2689	0.282102	0.444403	0.568062	-0.460711	ZFHX3;CPNE5;KCNIP2;FAM78A;PRKCE;NOG;USP2;ILDR2;SORCS1;NDRG2;ISM1;ATP1B1;PALM2-AKAP2;HDAC9;PLEKHA7;SYDE2;TCEA3;RGN
MZF1_1-4 (human)	18/2705	0.29062	0.45021	0.328523	-0.262175	SNAP25;TRPC3;FAM78A;CADPS;DYSF;NDRG2;MYOM2;AQP1;ACTA1;FABP3;DES;RASSF4;CAPN3;CDH13;TNNI3;LRRFIP1;BVES;TRIM54
RBPJ (mouse)	12/1735	0.295269	0.454782	0.521617	-0.411001	FAM134B;SNAP25;PPP1R14C;CPNE5;FAM78A;PKIA;CCDC69;USP2;DYSF;LMO7;TNNI3K;CFTR
NR1H2 (human)	4/479	0.29757	0.455707	0.324207	-0.254796	RNF207;C4ORF49;SLC4A4;ENOX1
TP53 (mouse)	9/1266	0.304673	0.463934	0.480884	-0.369325	CKMT2;RGS5;LRCH2;RNF207;PGAM2;PDE4DIP;CDH13;TSPAN2;TRIM54
USF1 (human)	10/1441	0.315662	0.46739	0.537507	-0.408823	CKMT2;FAM134B;FABP3;MRAS;AMY2A;MYL2;CAPN3;PALM2-AKAP2;GPR133;TBX4
PRDM1 (mouse)	2/196	0.312107	0.46739	0.562927	-0.428158	KLRK1;IFIT1
PPARG (human)	23/3580	0.314478	0.46739	0.7245	-0.551048	MBNL1;PARM1;PDE4D;SERPINF1;NPR3;C5ORF4;USP2;CREM;NFATC2;PDE4DIP;ATP1B4;SLC4A4;HIPK3;MTSS1;ENOX1;TSPAN15;CNN1;FABP3;RNF207;CAPN3;NKX2-5;PDLIM5;CFTR
NFE2L1 (human)	1965-01-01	0.314817	0.46739	2.39654	-1.82279	PRKCE
Esrrb (mouse)	1965-01-01	0.314817	0.46739	2.39781	-1.82375	TRPC3
RXRA (mouse)	4/507	0.333578	0.488725	0.407007	-0.291399	CALCRL;PDLIM5;TRIM54;SLC4A4
GLI2 (human)	10/1465	0.333719	0.488725	0.593728	-0.425083	FAM134B;ACTA1;TXLNB;KCNIP2;FAM78A;EEF1A2;CADPS;ILDR2;SLC4A4;CFTR
KLF4 (human)	10/1485	0.34892	0.502745	0.642878	-0.442089	KCNJ5;ACSS2;FAM78A;RRAD;NOG;EEF1A2;CREM;TNNI3;TGFBI;NDRG2
EIF4EBP1 (human)	2/212	0.345451	0.502745	0.670323	-0.460962	GUCY1A2;ENOX1
TFAP2C (human)	10/1485	0.34892	0.502745	0.674027	-0.463509	SNAP25;FABP3;PDE4D;EEF1A2;CREM;AKAP6;NDRG2;GPR133;TBX4;KCNJ3
EGR1 (human)	5/681	0.354055	0.507415	0.535807	-0.363505	ACTA1;NPR3;EEF1A2;FGF18;PLEKHA7
SP3 (human)	9/1332	0.35745	0.509557	0.625676	-0.42184	SNAP25;ACSS2;KCNIP2;FAM78A;EEF1A2;CREM;LRRFIP1;ATP1B1;NDRG2
ZFHX3 (human)	10/1504	0.363467	0.515393	0.653923	-0.433438	CALB2;TSPAN15;CNN1;KLRK1;SERPINF1;CADPS;USP2;COL6A3;SOX6;SLC4A4
ELK1 (human)	10/1511	0.368848	0.52027	0.679839	-0.444212	MRAS;TRPC3;PRKCE;PDE4D;PDGFD;MPPED2;REN;SOX6;HDAC9;PLEKHA7
ESR2 (human)	1980-01-01	0.371311	0.521002	1.9281	-1.25713	TSPAN2
NRF1 (human)	9/1356	0.376972	0.526191	0.691236	-0.443837	CALB2;ACTA1;TPPP3;RASSF4;ILDR2;CAPN3;BVES;MTSS1;ART3
CRX (human)	9/1362	0.38187	0.529922	0.705985	-0.448318	TSPAN15;MBNL1;RNF207;LIPH;SERPINF1;MYO18B;ATP1B2;PDLIM5;PTPLA
JUN (mouse)	11/1699	0.385349	0.529922	0.788404	-0.500656	NPPB;FAM134B;SNAP25;PDLIM3;RASSF4;GPR183;LIPH;LGI2;CREM;EFHC2;LRRC10
NFE2L2 (human)	1984-01-01	0.385578	0.529922	1.88594	-1.19762	SNAP91
IKZF1 (human)	9/1373	0.390861	0.53173	0.735497	-0.464555	TSPAN15;CNN1;PDLIM3;RNF207;SERPINF1;TCEA3;EEF1A2;CAPN3;ATP1B2
ZBTB7A (human)	9/1373	0.390861	0.53173	0.775672	-0.48993	SYDE2;CNN1;FAM78A;PRKCE;NOG;SORCS1;ISM1;TMEM163;PLEKHA7
VDR (human)	1988-01-01	0.399523	0.540768	1.97342	-1.21319	GPR183
KLF11 (human)	9/1388	0.403141	0.542923	0.79424	-0.485111	KCNJ5;ACSS2;FAM78A;RRAD;NOG;EEF1A2;TNNI3;TGFBI;NDRG2
SND1 (mouse)	1990-01-01	0.406377	0.544545	1.98887	-1.20884	PAG1
POU2F1 (human)	9/1399	0.412154	0.549539	0.806322	-0.482726	TDO2;CCDC69;PDE4D;XIRP2;ZNF385D;IFIT1;LRRC10;HDAC9;SH3BGR
CRTC1 (human)	7/1086	0.432362	0.569346	0.79151	-0.445832	CNN1;GPR183;ATP1B4;SORCS1;ATP1B2;MTSS1;SYNE1
ZNF148 (human)	10/1591	0.430789	0.569346	0.847638	-0.477447	ZFHX3;ACSS2;RRAD;FAM78A;EEF1A2;LGI2;TNNI3;TGFBI;NDRG2;TBX4
MAX (human)	1934-12-01	0.433382	0.569346	0.87499	-0.492854	CKMT2;FAM134B;KCNJ5;TPPP3;FABP3;MRAS;AMY2A;MYL2;C5ORF4;BVES;PALM2-AKAP2;TBX4
FOXO3A (mouse)	4/597	0.449216	0.581779	0.732772	-0.396916	LIPH;CREM;CAPN3;TMEM163
NKX3-1 (human)	2/264	0.44936	0.581779	0.830343	-0.449767	LRCH2;PDE4D
FOXA2 (mouse)	9/1441	0.44654	0.581779	0.862403	-0.467132	SYDE2;REG3A;TMEM117;USP2;MPPED2;SORCS1;HDAC9;BICC1;HIPK3
PPARA (human)	2/271	0.462661	0.59612	0.851393	-0.440436	FAM134B;PDE4DIP
MYOD1 (human)	1/109	0.467734	0.599774	1.76787	-0.903742	PALM2-AKAP2
STAT1 (human)	10/1667	0.489431	0.624607	0.989989	-0.465921	KAT2B;ARHGAP31;NOG;C5ORF4;COL6A3;PDE4DIP;SORCS1;TRIM54;RXRG;ENOX1
HNF4A (mouse)	3/461	0.495163	0.628928	0.786924	-0.364927	REG3A;CALCRL;TNNI3K
FOXO3A (human)	5/813	0.501444	0.633901	0.843665	-0.384596	ZFHX3;TXLNB;LIPH;FEZ1;MYPN
ATF2 (human)	9/1517	0.508013	0.639189	0.984186	-0.440477	REG3A;GPR183;PDGFD;PDE4DIP;LMO7;ZNF385D;GPR133;PRSS23;HDAC9
MYC (mouse)	10/1699	0.513762	0.643403	1.01874	-0.449247	KCNJ5;MBNL1;MRAS;NNT;MYL2;USP2;CAPN3;ITGB6;LRRC10;TBX4
CEBPE (human)	1/127	0.520034	0.648229	1.60365	-0.695201	SLC34A2
PLAU (human)	8/1362	0.524356	0.65059	0.983307	-0.4227	SNAP25;FAM134B;ZFHX3;CREM;CDH13;CAPN3;PDE4DIP;LPPR4
ARID3A (mouse)	11/1893	0.527612	0.651613	0.942671	-0.403751	CNN1;GABRB2;GATM;CPNE5;CADPS;RGN;DYSF;NFATC2;SOX6;NKX2-5;RXRG
FOXO3 (human)	1/132	0.533633	0.656026	1.57229	-0.662805	IFIT1
RARA (human)	8/1379	0.538504	0.658991	1.0346	-0.431474	KLRK1;RNF207;SERPINF1;USP2;CREM;DYSF;CAPN3;PALM2-AKAP2
Nkx2-5 (mouse)	3/515	0.569375	0.693602	0.907351	-0.331961	GABRB2;CADPS;NKX2-5
RXRA (human)	8/1422	0.573555	0.695533	1.0285	-0.373425	CYP2J2;MBNL1;AQP10;USP2;RGN;REN;HDAC9;SYNE1
Pax6 (human)	1/169	0.623046	0.752146	1.35967	-0.387268	PALM2-AKAP2
FEV (human)	1/172	0.629501	0.75653	1.34363	-0.374892	FAM189A2
En1 (mouse)	5/957	0.645417	0.765362	1.02147	-0.273147	MBNL1;ACSS2;GPR183;THBS1;PAG1
TFAP2D (human)	7/1324	0.640365	0.765362	1.08641	-0.290512	PDLIM3;NFATC2;CAPN3;C4ORF49;SRL;SLC4A4;ENOX1
ESR1 (human)	8/1513	0.643522	0.765362	1.13498	-0.3035	CYP2J2;REEP1;TSPAN15;NPR3;CREM;LRRFIP1;HDAC9;PTPLA
Myb (mouse)	1902-10-01	0.657559	0.776325	1.17912	-0.298535	FAM134B;ACSS2;FAM189A2;NFATC2;NDRG2;SOX6;TMEM163;SCRG1;AQP1;SYNE1
FOXD1 (human)	1/192	0.66981	0.787321	1.33289	-0.31872	IFIT1
NR5A2 (mouse)	9/1748	0.677918	0.793371	1.1939	-0.276346	CPM;POPDC3;KCNJ5;FAM134B;LIPH;PDE4DIP;NFATC2;TSPAN2;AQP1
SRF (mouse)	9/1782	0.69979	0.801469	1.24008	-0.274441	KLRK1;PLCL1;TMEM117;PDE4D;PDE4DIP;PDLIM5;VGLL1;SH3BGR;SYNE1
FOXA3 (human)	1/207	0.697154	0.801469	1.32445	-0.293111	SRL
E2F1 (mouse)	16/3056	0.687861	0.801469	1.35091	-0.298969	PRKCE;CREM;NFATC2;INHBA;ATP1B2;TBX4;CKMT2;GATM;FEZ1;TMEM117;XIRP2;TSPAN2;LRRFIP1;GPR133;BVES;GPR158
Arnt::Ahr (mouse)	1/207	0.697154	0.801469	1.35255	-0.299332	TCEA3
FOXF1 (mouse)	1/206	0.695403	0.801469	1.35853	-0.300654	PDE4DIP
GFI1 (human)	7/1427	0.715683	0.803283	1.21648	-0.266469	TSPAN15;LIPH;SERPINF1;USP2;EFHC2;PDLIM5;SYTL3
SNAI2 (human)	7/1428	0.71636	0.803283	1.24634	-0.27301	ACSS2;SERPINF1;CREM;NFATC2;LRRFIP1;TGFBI;SNAP91
TCF3 (human)	7/1428	0.71636	0.803283	1.25822	-0.275611	ACSS2;SERPINF1;CREM;NFATC2;LRRFIP1;TGFBI;SNAP91
SNAI1 (human)	7/1428	0.71636	0.803283	1.27108	-0.278427	ACSS2;SERPINF1;CREM;NFATC2;LRRFIP1;TGFBI;SNAP91
HIVEP1 (human)	1/218	0.715765	0.803283	1.35032	-0.295786	ANXA1
CREB1 (mouse)	4/849	0.720799	0.804892	1.22785	-0.266501	ADAMTS15;ITGB6;PDLIM5;RXRG
RELA (human)	14/2775	0.731654	0.813623	1.47524	-0.30428	PPP1R14C;AMY1A;COL12A1;ILDR2;ATP1B1;HDAC9;SYTL3;COLQ;AQP1;TPPP3;MRAS;EEF1A2;MPPED2;DSC3
AHR (mouse)	2/454	0.736337	0.815448	1.15371	-0.235378	LRCH2;MYPN
FOS (mouse)	8/1708	0.769483	0.848648	1.39173	-0.228398	SNAP25;FAM134B;GPR183;LIPH;TGFBI;TRIM54;THBS1;SYNE1
POU2F1 (mouse)	8/1735	0.784124	0.857735	1.37529	-0.211052	SNAP25;REG3A;TMEM117;LIPH;CAPN3;INHBA;PDLIM5;HDAC9
SREBF1 (mouse)	8/1735	0.784124	0.857735	1.39005	-0.213317	LRCH2;ACSS2;EMCN;TDO2;PLCL1;RGN;LMO7;LRRFIP1
POU2F2 (mouse)	8/1754	0.794016	0.865026	1.41115	-0.204611	SNAP25;REG3A;SERPINF1;INHBA;ATP1B2;PDLIM5;HDAC9;SNAP91
APEX1 (human)	6/1373	0.804044	0.872404	1.37364	-0.187506	MRAS;TCEA3;CAPN3;C4ORF49;REN;IFIT1
FOXF2 (human)	6/1379	0.80734	0.872448	1.42934	-0.195037	TSPAN15;MBNL1;LIPH;SERPINF1;RGN;EFHC2
ELF5 (mouse)	2/556	0.830343	0.893703	1.21687	-0.136755	LMO7;PDLIM5
TP63 (human)	6/1443	0.839888	0.899279	1.38113	-0.146624	CYP2J2;CNN1;GPR183;MYL2;RGN;LRRFIP1
PITX1 (human)	6/1448	0.842235	0.899279	1.45147	-0.154091	MBNL1;RNF207;SERPINF1;CREM;PDLIM5;SH3BGR
XBP1 (human)	2/605	0.863827	0.912722	1.29431	-0.118201	CALCRL;PDE4D
IRF2 (mouse)	7/1706	0.863732	0.912722	1.44789	-0.132227	FAM134B;KLRK1;CREM;LMO7;PDLIM5;HDAC9;TMEM163
MIR133B (human)	6/1500	0.865042	0.912722	1.49374	-0.136415	TSPAN15;FABP3;PARM1;KCNIP2;AQP1;SYNE1
TBP (mouse)	14/3182	0.884395	0.929482	1.63594	-0.119634	REG3A;ANXA1;CALCRL;CCDC69;USP2;TNNI3K;HDAC9;SYTL3;LRCH2;KLRK1;PDGFD;GPR183;ITGB6;SOX6
Sox2 (mouse)	7/1797	0.895758	0.937747	1.47551	-0.0948388	CKMT2;CNN1;EEF1A2;ITGB6;PDLIM5;VGLL1;MYPN
CBEPB (mouse)	14/3275	0.907188	0.946017	1.65791	-0.0920055	ANXA1;CALCRL;USP2;ATP1B4;TBX4;SYNE1;CALB2;SYDE2;TXLNB;FEZ1;MPPED2;CAPN3;XIRP2;VGLL1
ZNF354C (human)	5/1430	0.916818	0.952354	1.37998	-0.0673684	C6ORF145;GABRB2;CREM;SRL;ART3
SPIB (human)	2/760	0.933893	0.957485	1.39175	-0.0604646	ADAMTS15;PLCL1
SOX10 (mouse)	1/451	0.926265	0.957485	1.41313	-0.0613934	CAPN3
NFYA (mouse)	6/1748	0.939622	0.957485	1.58824	-0.0690012	LRCH2;TDO2;PLCL1;RGN;LMO7;PDLIM5
CPEB1 (mouse)	6/1748	0.939622	0.957485	1.59614	-0.0693443	LRCH2;TDO2;PLCL1;RGN;PDLIM5;NKX2-5
NFYB (mouse)	6/1748	0.939622	0.957485	1.6068	-0.0698074	LRCH2;TDO2;PLCL1;RGN;PDLIM5;NKX2-5
NR1I2 (human)	4/1387	0.959784	0.974326	1.60322	-0.0416991	TSPAN15;SERPINF1;USP2;C4ORF49
YY1 (mouse)	5/1700	0.969324	0.980297	1.69881	-0.0338052	ADAMTS15;RNF207;RGN;TBX4;SYNE1
CBEPA (mouse)	5/1764	0.976124	0.983463	1.63281	-0.0272268	ACSS2;EMCN;TDO2;CREM;SYNE1
Sox5 (mouse)	1/728	0.985394	0.98813	1.46608	-0.0175071	FAM78A
NRF1 (mouse)	4/1676	0.98813	0.98813	1.70338	-0.0203407	CDH13;NFATC2;ATP1B4;ENOX1

## Sheet: Cluster 8
Term	Overlap	P-value	Adjusted P-value	Z-score	Combined Score	Genes
HOXD9 (human)	9/1543	0.000282011	0.0614784	-1.73814	4.84779	PTPRZ1;GALNT3;CR1L;DPPA2;HRASLS5;SYT14;L1TD1;CCL26;ABHD12B
ESR1 (human)	7/1513	0.00535975	0.233685	-1.7427	2.5335	NLRP12;CALB1;USP44;PMAIP1;NANOG;L1TD1;POU5F1
ELK1 (human)	7/1511	0.00532168	0.233685	-1.72671	2.51026	CALB1;ZIC3;SNORD77;SCG3;DCLK1;POU5F1;IDO1
CACYBP (mouse)	8/1656	0.0021697	0.233685	-1.61804	2.35227	NLRP12;USP44;DPPA2;SYT14;POU5F1;DCLK1;VRTN;CCL26
STAT3 (human)	314018	0.00473757	0.233685	-1.57582	2.2909	POU5F1B;SOX2;CAV1;PRDM14;PMAIP1;NANOG;SCG3;L1TD1;TDGF1;ABHD12B
SREBF2 (human)	6/1361	0.0125399	0.333324	-1.6719	1.83682	NLRP12;GAL;USP44;DPPA2;ADCY2;SYT14
NR2F1 (mouse)	5/1021	0.0150362	0.333324	-1.66616	1.83051	CR1L;ADCY2;VRTN;DCLK1;POU5F1
RXRA (human)	6/1422	0.0152901	0.333324	-1.64428	1.80647	NLRP12;USP44;NANOG;L1TD1;ZNF578;GDF3
ETS2 (human)	6/1341	0.0117206	0.333324	-1.63226	1.79327	SOX2;CAV1;LECT1;NANOG;CCL26;IDO1
Stat3 (mouse)	7/1762	0.0119445	0.333324	-1.59952	1.7573	CALB1;GALNT3;HHLA1;USP44;GPR160;TDGF1;CCL26
JUN (human)	393247	0.022965	0.455125	-1.5058	1.18534	POU5F1B;NLRP12;GAL;ALPL;NANOG;SCG3;DCLK1;IDO1;CCL26
E2F1 (mouse)	422466	0.0267828	0.486553	-1.45073	1.04512	GAL;PTPRZ1;ZIC3;PRDM14;ALPL;L1TD1;SYT14;HRASLS5;VRTN
PURA (human)	3/492	0.0337087	0.489464	-1.7135	1.2242	USP44;GPR160;POU5F1
ZNF354C (human)	5/1430	0.0527867	0.489464	-1.7103	1.22192	USP44;CAV1;LECT1;ADCY2;MIR302B
Prrx2 (mouse)	111582	0.035844	0.489464	-1.63674	1.16936	SOX2;NLRP12;PTPRZ1;CR1L;GPR160;NANOG;DCLK1
FOXA1 (mouse)	6/1705	0.0336636	0.489464	-1.58533	1.13263	NLRP12;CR1L;DPPA2;CAV1;SCG3;GDF3
FOS (human)	5/1394	0.0482457	0.489464	-1.54103	1.10098	ALPL;SCG3;DCLK1;IDO1;CCL26
STAT5B (human)	5/1379	0.0464262	0.489464	-1.53829	1.09902	PTPRZ1;SCG3;SYT14;VRTN;DCLK1
CBEPA (human)	5/1366	0.0448836	0.489464	-1.53472	1.09648	POU5F1B;SOX2;CR1L;POU5F1;IDO1
IRF2 (human)	5/1412	0.0504854	0.489464	-1.527	1.09096	USP44;LECT1;SCG3;HRASLS5;POU5F1
GFI1 (human)	5/1427	0.0523988	0.489464	-1.52336	1.08835	NLRP12;USP44;DPPA2;TDGF1;CCL26
POU2F1 (mouse)	6/1735	0.0362107	0.489464	-1.50475	1.07506	SFRP2;ZIC3;USP44;PMAIP1;TDGF1;DCLK1
RORB (mouse)	4/1020	0.057923	0.489464	-1.46433	1.04618	CR1L;ADCY2;VRTN;DCLK1
PRDM1 (human)	5/1468	0.0578475	0.489464	-1.45924	1.04254	LECT1;NANOG;ZNF578;TDGF1;DCLK1
JDP2 (human)	5/1488	0.0606217	0.489464	-1.41914	1.01389	CALB1;GAL;ALPL;ZNF578;VRTN
FOXJ1 (human)	5/1484	0.0600607	0.489464	-1.41729	1.01257	GALNT3;ALPL;PRDM14;SCG3;IDO1
SND1 (human)	5/1473	0.0585339	0.489464	-1.40548	1.00413	CR1L;CAV1;SCG3;ZNF578;ABHD12B
TFAP2A (human)	625906	0.066789	0.52	-1.42503	0.931866	SFRP2;USP44;CAV1;GPR160;ALPL;PRDM14;ADCY2;SYT14;POU5F1
CRTC1 (human)	4/1086	0.0695987	0.52319	-1.39726	0.905163	POU5F1B;GALNT3;CAV1;GPR160
YY1 (human)	13/6042	0.0753386	0.529801	-1.30131	0.826662	CAV1;SYT14;ETV4;POU5F1;DCLK1;POU5F1B;SOX2;GAL;DPPA2;NANOG;SCG3;TDGF1;VRTN
CBEPB (human)	255123	0.0744386	0.529801	-1.27244	0.808322	POU5F1B;PTPRZ1;CR1L;USP44;CAV1;VRTN;DCLK1
NR5A2 (human)	699684	0.0878361	0.598384	-1.16209	0.596762	SOX2;CALB1;PMAIP1;NANOG;HRASLS5;L1TD1;GDF3;POU5F1;CCL26
CBEPB (mouse)	502423	0.0907504	0.599503	-1.18558	0.606609	GRID2;GAL;SFRP2;HHLA1;USP44;PMAIP1;ADCY2;VRTN
FOXC1 (human)	23/13142	0.124239	0.61251	-1.35169	0.662586	GRID2;CAV1;USP44;PRDM14;SYT14;ETV4;POU5F1;DCLK1;MIR302A;GAL;CALB1;CR1L;DPPA2;GPR160;PMAIP1;HRASLS5;L1TD1;NANOG;SCG3;ZNF578;TDGF1;VRTN;CCL26
ARID3A (mouse)	5/1893	0.132832	0.61251	-1.31688	0.645523	SOX2;NLRP12;PTPRZ1;NANOG;VRTN
NR1H2 (human)	2/479	0.150962	0.61251	-1.26968	0.622382	NLRP12;GPR160
NR1H3 (human)	4/1385	0.13616	0.61251	-1.2576	0.616464	NLRP12;USP44;GPR160;POU5F1
POU2F2 (mouse)	5/1754	0.104704	0.61251	-1.25215	0.613789	SFRP2;ZIC3;USP44;PMAIP1;DCLK1
JUND (human)	4/1380	0.134879	0.61251	-1.24349	0.609546	USP44;GDF3;DCLK1;IDO1
ELK1 (mouse)	5/1727	0.0996324	0.61251	-1.23494	0.605353	GRID2;USP44;PRDM14;ALPL;DCLK1
NR1I2 (human)	4/1387	0.136674	0.61251	-1.22738	0.601649	NLRP12;DPPA2;GPR160;IDO1
HNF1A (human)	5/1855	0.124816	0.61251	-1.22479	0.60038	NANOG;L1TD1;TDGF1;IDO1;ABHD12B
NR5A1 (human)	4/1389	0.137189	0.61251	-1.17574	0.576335	CALB1;ADCY2;SYT14;IDO1
TP53 (human)	353008	0.111394	0.61251	-1.17208	0.57454	CALB1;CAV1;PRDM14;NANOG;SCG3;DCLK1;ABHD12B
SAMD9L (human)	4/1415	0.143955	0.61251	-1.15734	0.567315	SOX2;SFRP2;GPR160;ETV4
GABPA (human)	1/108	0.144914	0.61251	-1.14492	0.561229	SFRP2
MYOD1 (human)	1/109	0.146144	0.61251	-1.13046	0.554139	USP44
CEBPB (human)	4/1420	0.145272	0.61251	-1.12078	0.549397	POU5F1B;NLRP12;ALPL;SCG3
TP63 (human)	4/1443	0.151393	0.61251	-1.11873	0.548389	NLRP12;DPPA2;ZNF578;IDO1
PITX2 (human)	594829	0.125685	0.61251	-1.08334	0.531041	NLRP12;DPPA2;GPR160;L1TD1;ZNF578;TDGF1;POU5F1;CCL26
GATA6 (human)	4/1447	0.152468	0.61251	-1.06075	0.519971	DPPA2;HRASLS5;TDGF1;VRTN
LEF1 (human)	1007614	0.119041	0.61251	-1.02605	0.502958	SOX2;PTPRZ1;USP44;DPPA2;NANOG;HRASLS5;ZNF578;GDF3;IDO1;ABHD12B
GLI2 (human)	4/1465	0.157342	0.61251	-1.0173	0.498669	NLRP12;PMAIP1;HRASLS5;POU5F1
HINFP (human)	419116	0.141198	0.61251	-1.01145	0.495804	ZIC3;CAV1;PRDM14;SYT14;ZNF578;DCLK1;IDO1
NFYA (human)	237196	0.154745	0.61251	-0.970567	0.475762	CALB1;ZIC3;CR1L;CAV1;PRDM14;IDO1
TCF4 (human)	843955	0.139739	0.61251	-0.934454	0.45806	SOX2;SFRP2;CR1L;NANOG;HRASLS5;ZNF578;DCLK1;IDO1;ABHD12B
RXRA (mouse)	2/507	0.165021	0.620337	-1.17828	0.562621	HHLA1;L1TD1
UBTF (human)	4/1493	0.165044	0.620337	-1.02512	0.489485	SOX2;CALB1;ZIC3;ADCY2
Pax2 (mouse)	4/1516	0.171475	0.633587	-1.14123	0.52081	GRID2;CALB1;CR1L;IDO1
CRTC3 (human)	3/1008	0.175599	0.638011	-1.06997	0.480846	ZIC3;L1TD1;DCLK1
NR5A1 (mouse)	3/1020	0.179883	0.64183	-1.00862	0.447252	PRDM14;GDF3;POU5F1
NFE2 (human)	285408	0.182539	0.64183	-0.849493	0.376692	SOX2;NLRP12;ALPL;ADCY2;DCLK1;IDO1
HNF4A (human)	83032	0.187119	0.647492	-0.898223	0.390411	DPPA2;LECT1;HRASLS5;TDGF1;IDO1
ELF5 (mouse)	2/556	0.190156	0.64772	-1.15208	0.500345	NANOG;VRTN
NR2F1 (human)	3/1073	0.199148	0.667912	-1.01564	0.40991	POU5F1B;ZNF578;ABHD12B
Pax6 (human)	1/169	0.216852	0.674792	-1.01913	0.400877	DPPA2
SPI1 (human)	4/1638	0.207031	0.674792	-0.982714	0.386552	NLRP12;PTPRZ1;TDGF1;CCL26
HIF1A (mouse)	3/1124	0.218158	0.674792	-0.909226	0.357645	PRDM14;HRASLS5;CCL26
TFAP2A (mouse)	4/1663	0.214587	0.674792	-0.830121	0.326529	NLRP12;ALPL;POU5F1;DCLK1
MEF2A (human)	328872	0.209277	0.674792	-0.783636	0.308244	GALNT3;USP44;DPPA2;PRDM14;ZNF578;POU5F1
SPI1 (mouse)	4/1680	0.219772	0.674792	-0.783136	0.308047	GALNT3;GDF3;ETV4;ABHD12B
JUN (mouse)	4/1699	0.225609	0.683095	-0.770611	0.293696	SFRP2;PMAIP1;ALPL;SYT14
AP1 (mouse)	1/183	0.23251	0.688362	-0.942769	0.352068	HRASLS5
MAPK14 (human)	3/1190	0.243322	0.688362	-0.826359	0.308595	NLRP12;ZIC3;USP44
HMGA1 (mouse)	4/1748	0.24086	0.688362	-0.755713	0.282213	USP44;PMAIP1;NANOG;GDF3
POU1F1 (mouse)	4/1754	0.242745	0.688362	-0.74735	0.27909	ALPL;ADCY2;SCG3;GDF3
JUND (mouse)	4/1764	0.245896	0.688362	-0.728973	0.272228	HHLA1;CR1L;ABHD12B;CCL26
PPARG (human)	613791	0.248739	0.688362	-0.5933	0.221562	SOX2;NLRP12;USP44;NANOG;SCG3;TDGF1;ABHD12B
E2F1 (human)	842828	0.249452	0.688362	-0.543866	0.203101	GALNT3;ZIC3;CAV1;USP44;LECT1;ADCY2;SYT14;ABHD12B
FOXA3 (human)	1/207	0.258646	0.70481	-0.864063	0.302273	PMAIP1
EIF4EBP1 (human)	1/212	0.26398	0.710466	-0.817858	0.279572	TDGF1
SPIB (human)	2/760	0.298333	0.715803	-0.873185	0.291949	TDGF1;POU5F1
Sox5 (mouse)	2/728	0.281254	0.715803	-0.855582	0.286064	SOX2;PMAIP1
NKX3-1 (human)	1/264	0.317288	0.715803	-0.74486	0.249044	GPR160
ARNT (human)	3/1303	0.287467	0.715803	-0.735971	0.246072	ZIC3;ZNF578;ABHD12B
LOC135440 (human)	1/247	0.300289	0.715803	-0.723089	0.241765	DCLK1
TP53 (mouse)	3/1266	0.272899	0.715803	-0.713247	0.238474	NLRP12;DPPA2;L1TD1
E2F4 (human)	1/270	0.323191	0.715803	-0.65475	0.218916	ZIC3
FOXF1 (human)	3/1352	0.306873	0.715803	-0.640335	0.214096	USP44;DPPA2;GDF3
Myb (mouse)	822	0.290288	0.715803	-0.620656	0.207516	ALPL;ADCY2;NANOG;DCLK1
CRX (human)	3/1362	0.310845	0.715803	-0.618097	0.206661	NLRP12;DPPA2;CCL26
TCFAP2A (human)	3/1367	0.312832	0.715803	-0.598439	0.200088	CAV1;PRDM14;ADCY2
IKZF1 (human)	3/1373	0.315218	0.715803	-0.578351	0.193372	NLRP12;SFRP2;L1TD1
FOXF2 (human)	3/1379	0.317604	0.715803	-0.575944	0.192567	NLRP12;DPPA2;CCL26
AHR (human)	3/1391	0.322379	0.715803	-0.555195	0.185629	CR1L;ALPL;ABHD12B
HMGA1 (human)	3/1379	0.317604	0.715803	-0.554383	0.185358	CAV1;CCL26;ABHD12B
TBP (human)	214155	0.28334	0.715803	-0.538938	0.180194	NLRP12;DPPA2;SCG3;ETV4;ABHD12B
SP1 (human)	3/1406	0.32835	0.715803	-0.500093	0.167206	ZIC3;CAV1;ADCY2
SREBF1 (human)	251044	0.31229	0.715803	-0.494419	0.165309	SOX2;NLRP12;CAV1;ALPL;ABHD12B
BCL6 (human)	3/1399	0.325563	0.715803	-0.453813	0.151732	SYT14;TDGF1;IDO1
PITX1 (human)	3/1448	0.345077	0.717655	-0.450063	0.149316	NLRP12;L1TD1;CCL26
ELK4 (human)	3/1453	0.347068	0.717655	-0.436556	0.144834	SFRP2;L1TD1;ZNF578
THRB (human)	49035	0.333873	0.717655	-0.425961	0.141319	CALB1;ZIC3;PMAIP1;TDGF1
RUNX2 (human)	3/1458	0.349059	0.717655	-0.423494	0.140501	NLRP12;TDGF1;IDO1
KLF13 (human)	3/1453	0.347068	0.717655	-0.418961	0.138997	NLRP12;ADCY2;VRTN
REPIN1 (human)	3/1466	0.352244	0.717655	-0.405513	0.134535	ZIC3;CAV1;LECT1
GATA1 (human)	284646	0.339081	0.717655	-0.357969	0.118762	CALB1;SCG3;HRASLS5;GDF3;ABHD12B
KLF4 (human)	3/1485	0.359803	0.726269	-0.346992	0.11098	NANOG;ADCY2;POU5F1
CEBPD (human)	3/1495	0.363779	0.727557	-0.373224	0.118709	NLRP12;NANOG;CCL26
RELA (human)	319709	0.367309	0.727939	-0.233359	0.0741001	GAL;CAV1;NANOG;ADCY2;TDGF1
Pdx1 (mouse)	2/907	0.375751	0.731372	-0.501224	0.1568	NLRP12;CR1L
ATF2 (human)	3/1517	0.372515	0.731372	-0.325118	0.101708	NLRP12;HRASLS5;ABHD12B
SMAD4 (human)	3/1542	0.382423	0.735083	-0.334793	0.10304	POU5F1B;NLRP12;ALPL
TEAD1 (human)	3/1547	0.384401	0.735083	-0.288759	0.0888716	LECT1;SYT14;ETV4
En1 (mouse)	2/957	0.401412	0.735996	-0.356649	0.109324	PTPRZ1;VRTN
ZBTB16 (human)	3/1572	0.394276	0.735996	-0.29136	0.0893105	CALB1;TDGF1;ETV4
SMAD4 (mouse)	3/1580	0.39743	0.735996	-0.224354	0.0687712	GALNT3;ADCY2;ABHD12B
NR3C1 (human)	3/1590	0.401366	0.735996	-0.223644	0.0685536	GAL;CAV1;SCG3
ZNF148 (human)	3/1591	0.401759	0.735996	-0.21943	0.067262	GAL;ADCY2;POU5F1
HOXA5 (human)	401889	0.433718	0.761881	-0.30923	0.0840997	PTPRZ1;CAV1;MIR302B;DCLK1;MIR302A
RORB (human)	2/1035	0.440491	0.761881	-0.247817	0.0673976	POU5F1B;ZNF578
SOX10 (mouse)	1/451	0.479637	0.761881	-0.168307	0.0457737	DCLK1
STAT1 (human)	3/1667	0.431457	0.761881	-0.166261	0.0452172	SOX2;GPR160;VRTN
RELA (mouse)	3/1656	0.427185	0.761881	-0.158667	0.0431519	GALNT3;PMAIP1;ETV4
BRCA1 (human)	3/1809	0.485584	0.761881	-0.155371	0.0422555	NLRP12;CAV1;VRTN
MYOD1 (mouse)	3/1672	0.433395	0.761881	-0.138098	0.0375579	NLRP12;GALNT3;ALPL
Nkx3-2 (mouse)	2/1122	0.482487	0.761881	-0.130436	0.035474	NLRP12;IDO1
SREBF1 (mouse)	3/1735	0.45763	0.761881	-0.0995458	0.027073	ZIC3;POU5F1;IDO1
NFYA (mouse)	3/1748	0.462583	0.761881	-0.0943826	0.0256688	ZIC3;POU5F1;IDO1
CPEB1 (mouse)	3/1748	0.462583	0.761881	-0.086213	0.0234469	ZIC3;POU5F1;IDO1
STAT5B (mouse)	3/1729	0.455338	0.761881	-0.0820437	0.022313	GALNT3;CR1L;TDGF1
NFYB (mouse)	3/1748	0.462583	0.761881	-0.0743342	0.0202163	ZIC3;POU5F1;IDO1
LEF1 (mouse)	3/1730	0.45572	0.761881	-0.0666801	0.0181347	ZIC3;DPPA2;ALPL
SP1 (mouse)	168104	0.442395	0.761881	-0.0545876	0.0148459	SOX2;ALPL;ADCY2;SYT14
REL (mouse)	3/1752	0.464104	0.761881	-0.0143374	0.00389927	SFRP2;SYT14;ABHD12B
SP3 (mouse)	2/1129	0.485786	0.761881	0.00135649	-0.000368919	DPPA2;NANOG
IRF8 (mouse)	3/1770	0.470926	0.761881	0.0200453	-0.00545161	CALB1;GALNT3;PMAIP1
USF2 (human)	691193	0.466355	0.761881	0.155041	-0.0421658	NLRP12;DPPA2;ALPL;PRDM14;L1TD1;CCL26
RUNX1 (human)	714933	0.483623	0.761881	0.183741	-0.0499711	GAL;GALNT3;LECT1;PMAIP1;TDGF1;VRTN
GATA3 (human)	221064	0.489535	0.762276	0.0805852	-0.0218746	CALB1;SFRP2;GPR160;POU5F1
SRY (human)	1/469	0.493112	0.7624	-0.208987	0.0566949	MIR302A
MZF1_1-4 (human)	294112	0.552034	0.837557	-0.0705155	0.0125	POU5F1B;SNORD77;PMAIP1;ADCY2
MYC (human)	2/1302	0.563231	0.837557	0.0566224	-0.0100372	ALPL;PRDM14
TFAP2D (human)	2/1324	0.572492	0.837557	0.0767136	-0.0135987	NLRP12;GPR160
SP3 (human)	2/1332	0.575825	0.837557	0.0893626	-0.0158409	CAV1;ADCY2
CACYBP (human)	2/1350	0.58326	0.837557	0.117834	-0.020888	ADCY2;POU5F1
PCBP1 (human)	2/1360	0.58735	0.837557	0.145537	-0.0257988	CAV1;ADCY2
APEX1 (human)	2/1373	0.592626	0.837557	0.151057	-0.0267772	ALPL;POU5F1
TEAD4 (human)	2/1354	0.584899	0.837557	0.174249	-0.0308884	SOX2;CAV1
E2F6 (human)	2/1358	0.586534	0.837557	0.175736	-0.0311519	GAL;ABHD12B
KLF11 (human)	2/1388	0.598653	0.837557	0.202553	-0.0359056	ADCY2;POU5F1
WT1 (human)	288269	0.547164	0.837557	0.205374	-0.0364058	NLRP12;ADCY2;GDF3;CCL26
MZF1 (human)	2/1389	0.599052	0.837557	0.214169	-0.0379649	LECT1;POU5F1
NFIA (human)	2/1416	0.609731	0.837557	0.21773	-0.0385962	POU5F1B;CR1L
TCF3 (human)	2/1428	0.614411	0.837557	0.223552	-0.0396281	NLRP12;DPPA2
EGR1 (human)	1/681	0.628336	0.837557	0.22986	-0.0407463	PTPRZ1
MYOG (human)	2/1404	0.605011	0.837557	0.232192	-0.0411597	POU5F1B;DCLK1
SNAI1 (human)	2/1428	0.614411	0.837557	0.236212	-0.0418723	NLRP12;DPPA2
POU2F2 (human)	325889	0.578064	0.837557	0.23685	-0.0419855	USP44;PMAIP1;NANOG;VRTN
SNAI2 (human)	2/1428	0.614411	0.837557	0.249672	-0.0442582	NLRP12;DPPA2
USF1 (human)	2/1441	0.619434	0.837557	0.265569	-0.0470764	ALPL;PRDM14
KLF5 (human)	2/1445	0.62097	0.837557	0.289993	-0.0514058	NANOG;SYT14
FOXA1 (human)	2/1457	0.62555	0.837557	0.307145	-0.0544463	DPPA2;POU5F1
RELB (human)	2/1469	0.630089	0.837557	0.337303	-0.0597923	NANOG;TDGF1
ZFHX3 (human)	2/1504	0.643093	0.849662	0.343497	-0.0559612	TDGF1;CCL26
SMARCA2 (human)	2/1536	0.654678	0.85461	0.35498	-0.055771	ZIC3;IDO1
RBPJ (human)	2/1535	0.654321	0.85461	0.366646	-0.0576038	DPPA2;LECT1
FOXO3A (human)	1/813	0.694007	0.866825	0.306568	-0.0438143	DPPA2
HIF1A (human)	2/1586	0.672201	0.866825	0.367349	-0.052501	GDF3;ABHD12B
TEAD2 (mouse)	2/1591	0.673915	0.866825	0.397648	-0.0568313	ETV4;DCLK1
TBX5 (mouse)	2/1663	0.697823	0.866825	0.468458	-0.0669513	GAL;ABHD12B
IKZF1 (mouse)	2/1674	0.70135	0.866825	0.506174	-0.0723417	PMAIP1;L1TD1
NRF1 (mouse)	2/1676	0.701988	0.866825	0.517738	-0.0739944	NLRP12;PTPRZ1
IRF2 (mouse)	2/1706	0.711425	0.866825	0.518699	-0.0741317	CALB1;DPPA2
MYC (mouse)	2/1699	0.709245	0.866825	0.525415	-0.0750916	CALB1;ALPL
MYOG (mouse)	2/1675	0.701669	0.866825	0.534147	-0.0763395	ALPL;HRASLS5
YY1 (mouse)	2/1700	0.709557	0.866825	0.567699	-0.0811348	NLRP12;GALNT3
FOS (mouse)	2/1708	0.712045	0.866825	0.574121	-0.0820525	GAL;HRASLS5
ETS1 (human)	1069218	0.713507	0.866825	0.575235	-0.0822117	GALNT3;CAV1;USP44;GDF3;ETV4;CCL26
GATA2 (human)	13/9985	0.722475	0.866825	0.581611	-0.083123	CAV1;SYT14;ETV4;POU5F1;DCLK1;GAL;CALB1;PTPRZ1;DPPA2;GPR160;PMAIP1;TDGF3;VRTN
CBEPA (mouse)	2/1764	0.728986	0.866825	0.592883	-0.084734	DPPA2;DCLK1
RBPJ (mouse)	2/1735	0.720317	0.866825	0.597888	-0.0854493	GPR160;GDF3
NR5A2 (mouse)	2/1748	0.724231	0.866825	0.598574	-0.0855473	POU5F1;DCLK1
ETV4 (mouse)	2/1773	0.731632	0.866825	0.63704	-0.0910449	ALPL;ETV4
Sox2 (mouse)	2/1797	0.738583	0.870331	0.591307	-0.0821218	USP44;PMAIP1
NFKB1 (human)	583385	0.756006	0.886071	0.820425	-0.0992369	PTPRZ1;CAV1;ALPL;ADCY2
MAX (human)	12451	0.775478	0.90291	0.654266	-0.0668215	ALPL;PRDM14
NFIC (human)	914324	0.778657	0.90291	0.702972	-0.071796	SOX2;CR1L;ZIC3;TDGF3;ETV4
FOXL1 (human)	1408163	0.861152	0.924404	0.602277	-0.0473427	POU5F1B;HHLA1;ZIC3;CR1L;NANOG;SCG3
USF1 (mouse)	1/1219	0.83274	0.924404	0.634228	-0.0498542	TDGF1
MIR138 (human)	1/1356	0.863863	0.924404	0.654745	-0.051467	NLRP12
PLAU (human)	1/1362	0.865089	0.924404	0.686493	-0.0539626	POU5F1
NFAT2 (human)	1/1376	0.867906	0.924404	0.730359	-0.0574107	DCLK1
LTF (human)	1/1363	0.865292	0.924404	0.73645	-0.0578895	ALPL
ZBTB7A (human)	1/1373	0.867307	0.924404	0.762897	-0.0599684	CAV1
RARA (human)	1/1379	0.868502	0.924404	0.763304	-0.0600004	NLRP12
POU2F1 (human)	1/1399	0.872411	0.924404	0.780883	-0.0613822	USP44
POU1F1 (human)	1/1408	0.874132	0.924404	0.805191	-0.063293	SCG3
ETV4 (human)	1/1403	0.873179	0.924404	0.809905	-0.0636635	GALNT3
MYB (human)	1/1409	0.874322	0.924404	0.81386	-0.0639744	CR1L
MTF1 (human)	1/1440	0.880072	0.924404	0.815058	-0.0640686	ETV4
TBP (mouse)	468302	0.849974	0.924404	0.821564	-0.0645799	NLRP12;CAV1;SCG3
FOXA2 (mouse)	1/1441	0.880253	0.924404	0.849836	-0.0668023	SFRP2
PGR (human)	1/1447	0.881334	0.924404	0.872393	-0.0685754	ZIC3
TEAD2 (human)	1/1486	0.888134	0.924404	0.901616	-0.0708726	PTPRZ1
MIR133B (human)	1/1500	0.890481	0.924404	0.928852	-0.0730135	NLRP12
TFAP2C (human)	1/1485	0.887964	0.924404	0.943712	-0.0741815	GPR160
ELF3 (human)	1/1488	0.888472	0.924404	0.947686	-0.074494	USP44
NFKB1 (mouse)	505558	0.865225	0.924404	0.949346	-0.0746244	GPR160;DCLK1;VRTN
SRF (human)	555230	0.883506	0.924404	1.09017	-0.0856937	CR1L;HRASLS5;SYT14
IRF8 (human)	1/1550	0.898478	0.928285	0.953787	-0.0709776	NLRP12
EGR1 (mouse)	1/1617	0.908306	0.933962	1.01195	-0.0691364	ADCY2
ETS1 (mouse)	1/1681	0.916825	0.933962	1.02273	-0.0698725	NLRP12
CREB1 (human)	310124	0.915356	0.933962	1.10664	-0.0756057	PMAIP1;HRASLS5
NR3C1 (mouse)	1/1775	0.927954	0.935056	0.987993	-0.0663425	ZIC3
SRF (mouse)	1/1782	0.928722	0.935056	1.0167	-0.0682704	IDO1
NFATC3 (mouse)	1/1801	0.930767	0.935056	1.05711	-0.0709839	CAV1
Gata1 (mouse)	1/1863	0.937049	0.937049	1.09405	-0.071135	L1TD1

## Sheet: Cluster 9
Term	Overlap	P-value	Adjusted P-value	Z-score	Combined Score	Genes
YY1 (human)	20/6042	2.84547e-05	0.0060324	-1.69087	8.64137	GUCY1A3;MYOM1;MEF2C;MYOCD;VCAM1;LRRN3;LUM;TECRL;SLC8A1;BMP5;TTN;RGS4;ACTA2;CSRP3;MYL7;PLN;CMYA5;ANKRD1;SMYD1;WNT2
POU1F1 (human)	9/1408	9.31984e-05	0.00819216	-1.73266	8.32468	RGS4;MEF2C;VCAM1;PLN;LRRN3;LUM;TECRL;SLC8A1;TTN
CBEPB (human)	255276	0.000115927	0.00819216	-1.62073	7.78693	ACTA2;RGS4;MEF2C;VCAM1;PLN;LRRN3;LUM;FILIP1;TBX5;SLC8A1;TTN;BMP5
FOXL1 (human)	18/5755	0.000209729	0.0111156	-1.82284	8.20169	GUCY1A3;POPDC2;C21ORF34;MEF2C;LRRN3;ACTN2;TBX5;C6ORF186;SLC8A1;BMP5;TTN;RGS4;ACTA2;CSRP3;RELN;PLN;FILIP1;RBM24
IRF2 (human)	8/1412	0.000546854	0.0167808	-1.70827	6.98258	ACTA2;RGS4;MYL4;TGFB2;SMPX;FILIP1;TECRL;TMEM71
NFAT2 (human)	8/1376	0.000461064	0.0167808	-1.68755	6.89789	RGS4;ACTA2;GUCY1A3;MEF2C;SMPX;LRRN3;TBX5;SLC8A1
SAMD9L (human)	8/1415	0.000554555	0.0167808	-1.67557	6.84895	GUCY1A3;ACTA2;POPDC2;APOBEC2;TNNT2;FILIP1;TMEM71;BMP5
PGR (human)	8/1447	0.000642335	0.0167808	-1.65424	6.76173	MYOM1;MEF2C;TGFB2;APOBEC2;PLN;SMYD1;SLC8A1;TTN
LEF1 (human)	15/4658	0.000712391	0.0167808	-1.3911	5.68617	UNC45B;MEF2C;TGFB2;SMPX;LUM;TBX5;SLC8A1;BMP5;TMEM71;ACTA2;RGS4;MYL4;CSRP3;ANKRD1;MYH6
MEF2A (human)	329025	0.000966895	0.0194803	-1.52683	6.01318	RGS4;GUCY1A3;MYOCD;MEF2C;PLN;LRRN3;LUM;FILIP1;TECRL;SLC8A1;TTN
NFKB1 (mouse)	505833	0.00101077	0.0194803	-1.41407	5.56913	POPDC2;MYL4;MYOM1;CSRP3;RELN;APOBEC2;MYL3;ANKRD1;FILIP1;TBX5;RBM24;TMEM71
TBP (human)	214308	0.00146245	0.0258367	-1.46361	5.35091	ACTA2;GUCY1A3;MYL4;MEF2C;MYOCD;CSRP3;VCAM1;SMYD1;TECRL;SLC8A1
FOS (human)	7/1394	0.00253364	0.0413179	-1.61784	5.15518	RGS4;ACTA2;CSRP3;VCAM1;LRRN3;LUM;ANKRD1
TCF4 (human)	13/4210	0.0027797	0.0420926	-1.35189	4.28263	MYOCD;MEF2C;APOBEC2;LUM;TBX5;SLC8A1;RGS4;ACTA2;MYL4;CSRP3;PLN;WNT2;MYH6
CRTC1 (human)	6/1086	0.00333495	0.0431579	-1.56079	4.9054	ACTA2;MEF2C;MYOCD;VCAM1;TECRL;RBM24
POU2F2 (human)	326072	0.00346078	0.0431579	-1.44672	4.54689	RGS4;MYL4;MYOM1;MEF2C;MYOCD;LRRN3;TNNT2;CMYA5;TECRL;BMP5
STAT3 (human)	314018	0.00317387	0.0431579	-1.42272	4.47146	RGS4;GUCY1A3;MEF2C;TGFB2;MYL7;LUM;ACTN2;TECRL;TBX5;BMP5
GATA2 (human)	22/9985	0.0045317	0.0505642	-1.54154	4.60076	GUCY1A3;POPDC2;MYOM1;MEF2C;TGFB2;MYOCD;APOBEC2;LRRN3;TBX5;SLC8A1;TMEM71;RGS4;MYL4;MIR208A;CSRP3;MYL7;PLN;TNNT2;CMYA5;SMYD1;WNT2;RBM24
TEAD1 (human)	7/1547	0.00450405	0.0505642	-1.52984	4.56583	ACTA2;MEF2C;TGFB2;MYL7;LUM;TECRL;MYH6
FOXC1 (human)	26/13142	0.00662648	0.0702407	-1.58812	4.21778	MYOM1;SLC8A1;TMEM71;TTN;RGS4;MIR208A;CSRP3;RELN;PLN;CMYA5;ANKRD1;GUCY1A3;C21ORF34;TGFB2;MEF2C;VCAM1;LRRN3;ACTN2;LUM;TBX5;BMP5;MYL4;TNNT2;FILIP1;RBM24;MYH6
SPI1 (mouse)	7/1680	0.00702062	0.0708749	-1.41414	3.74301	MYOM1;MEF2C;LRRN3;ACTN2;MYL3;TBX5;MYH6
Pdx1 (mouse)	5/907	0.00755259	0.0727795	-1.65403	4.33408	GUCY1A3;POPDC2;MEF2C;VCAM1;TTN
En1 (mouse)	5/957	0.00939461	0.0737651	-1.51784	3.95681	UNC45B;MYOCD;LRRN3;SMPX;SMYD1
RBPJ (mouse)	7/1735	0.0083243	0.0737651	-1.39787	3.64406	MYL4;GUCY1A3;TGFB2;MYL7;TNNT2;FILIP1;SLC8A1
CBEPA (mouse)	7/1764	0.0090805	0.0737651	-1.37421	3.5824	MYL4;ACTA2;GUCY1A3;PLN;MYL7;LUM;BMP5
RUNX2 (mouse)	7/1750	0.00870931	0.0737651	-1.35606	3.53507	MYOM1;CSRP3;LUM;TNNT2;MYL3;SMYD1;RBM24
GATA1 (human)	284769	0.00867182	0.0737651	-1.35336	3.52802	RGS4;MYOM1;MEF2C;CSRP3;LRRN3;SMYD1;TECRL;TMEM71;BMP5
STAT5B (human)	6/1379	0.0104122	0.0759524	-1.4107	3.63629	MEF2C;MYOCD;TGFB2;CSRP3;TBX5;BMP5
JUND (human)	6/1380	0.0104471	0.0759524	-1.40952	3.63324	ACTA2;GUCY1A3;VCAM1;LRRN3;LUM;BMP5
POU2F1 (human)	6/1399	0.0111264	0.0759524	-1.36875	3.52816	MEF2C;MYOCD;TNNT2;TECRL;RBM24;BMP5
MYB (human)	6/1409	0.0114963	0.0759524	-1.36354	3.51473	RGS4;PLN;LRRN3;TECRL;TTN;BMP5
ETV4 (human)	6/1403	0.0112733	0.0759524	-1.35356	3.489	RGS4;POPDC2;UNC45B;MYOCD;MEF2C;MYL7
RORB (mouse)	5/1020	0.0121336	0.0759524	-1.35048	3.48106	MEF2C;PLN;SMPX;WNT2;MYH6
NR2F1 (mouse)	5/1021	0.0121811	0.0759524	-1.34978	3.47925	MEF2C;PLN;SMPX;WNT2;MYH6
GATA6 (human)	6/1447	0.0129827	0.0786381	-1.29897	3.30314	RGS4;MEF2C;CSRP3;PLN;TECRL;SLC8A1
SRF (human)	555444	0.0141733	0.083465	-1.1495	2.85459	RGS4;ACTA2;GUCY1A3;UNC45B;APOBEC2;VCAM1;MYL7;LUM;TECRL;TTN
SMAD4 (human)	6/1542	0.017288	0.0990558	-1.3173	3.0457	TGFB2;APOBEC2;ACTN2;MYL3;SLC8A1;TTN
HINFP (human)	419178	0.019144	0.106803	-1.1284	2.52396	RGS4;UNC45B;MEF2C;CSRP3;RELN;LRRN3;RBM24;SLC8A1;TMEM71
MZF1_1-4 (human)	294234	0.0272514	0.148136	-1.45385	2.77631	MYL4;MYOCD;SMPX;LUM;FILIP1;TBX5;WNT2;MYH6
IRF8 (mouse)	6/1770	0.0314848	0.16687	-1.17041	2.09567	POPDC2;MYOCD;VCAM1;PLN;APOBEC2;WNT2
FOXF1 (human)	5/1352	0.0357053	0.184623	-1.25245	2.11594	MEF2C;LUM;SMYD1;TECRL;TTN
ELF5 (mouse)	3/556	0.0401328	0.19483	-1.42099	2.32421	GUCY1A3;TMEM71;BMP5
KLF11 (human)	5/1388	0.0392961	0.19483	-1.22521	2.00399	MYL3;TBX5;WNT2;RBM24;MYH6
BCL6 (human)	5/1399	0.0404365	0.19483	-1.15202	1.88428	RGS4;MEF2C;VCAM1;PLN;LUM
NFIA (human)	5/1416	0.042239	0.198992	-1.19909	1.93591	POPDC2;CSRP3;TNNT2;MYL3;MYH6
XBP1 (human)	3/605	0.049387	0.201667	-1.28438	2.05647	MEF2C;TBX5;TTN
ELK4 (human)	5/1453	0.0463311	0.201667	-1.18825	1.90255	RGS4;GUCY1A3;POPDC2;MYOM1;TBX5
FOXA2 (mouse)	5/1441	0.0449784	0.201667	-1.13571	1.81843	TGFB2;MYOCD;LRRN3;TNNT2;FILIP1
GLI2 (human)	5/1465	0.0477083	0.201667	-1.11878	1.79132	ACTA2;RELN;ACTN2;WNT2;RBM24
SND1 (human)	5/1473	0.0486402	0.201667	-1.09962	1.76064	UNC45B;MEF2C;MYOCD;MYL7;TBX5
JDP2 (human)	5/1488	0.0504169	0.201667	-1.08734	1.74098	MYOCD;VCAM1;PLN;SLC8A1;TTN
KLF4 (human)	5/1485	0.0500584	0.201667	-1.07975	1.72883	MYL3;TBX5;WNT2;RBM24;MYH6
GATA3 (human)	221155	0.0503112	0.201667	-1.05101	1.68281	RGS4;MEF2C;APOBEC2;LRRN3;ACTN2;TECRL;TBX5
ELK1 (human)	5/1511	0.0532162	0.208923	-1.07979	1.69072	ACTA2;POPDC2;UNC45B;MYOCD;TBX5
RBPJ (human)	5/1535	0.0562343	0.216483	-1.07918	1.65141	MYOCD;PLN;TBX5;SLC8A1;BMP5
HNRNPK (human)	15707	0.0582054	0.216483	-0.391956	0.599787	RBM24
SMAD3 (human)	15707	0.0582054	0.216483	-0.300281	0.459503	ANKRD1
Nkx3-2 (mouse)	4/1122	0.0657026	0.22563	-1.08996	1.62279	APOBEC2;LRRN3;TNNT2;MYH6
ZNF148 (human)	5/1591	0.0636629	0.22563	-0.990805	1.47517	MYL3;TBX5;WNT2;RBM24;MYH6
SP3 (mouse)	4/1129	0.0669056	0.22563	-0.976052	1.4532	UNC45B;CSRP3;ACTN2;MYH6
TBP (mouse)	468455	0.0619033	0.22563	-0.832253	1.23911	VCAM1;PLN;CMYA5;FILIP1;TECRL;RBM24;SLC8A1;BMP5
USF2 (human)	691285	0.0649847	0.22563	-0.803397	1.19614	ACTA2;GUCY1A3;MEF2C;VCAM1;ACTN2;LUM;TNNT2;MYH6;SLC8A1
NR5A2 (human)	699684	0.0670504	0.22563	-0.759052	1.13012	RGS4;POPDC2;UNC45B;VCAM1;TNNT2;TBX5;WNT2;MYH6;SLC8A1
MYC (mouse)	5/1699	0.0795149	0.262917	-0.878653	1.17381	UNC45B;MYOCD;VCAM1;ACTN2;MYL3
IRF2 (mouse)	5/1706	0.0806113	0.262917	-0.868898	1.16078	MEF2C;VCAM1;LRRN3;TTN;BMP5
JUND (mouse)	5/1764	0.0900142	0.289136	-0.867418	1.07634	RELN;FILIP1;TECRL;MYH6;SLC8A1
NFATC3 (mouse)	5/1801	0.096307	0.304732	-0.82204	0.976847	MYOCD;VCAM1;PLN;SMPX;TNNT2
ETS1 (human)	1069340	0.108813	0.329954	-0.854766	0.947767	RGS4;ACTA2;MYL4;UNC45B;MYOCD;MEF2C;TGFB2;PLN;RBM24;BMP5
Gata1 (mouse)	5/1863	0.107356	0.329954	-0.808286	0.89623	UNC45B;MYOM1;MEF2C;LRRN3;TECRL
E2F1 (human)	842859	0.108947	0.329954	-0.662472	0.734551	MEF2C;MYOCD;RELN;MYL7;SMPX;TBX5;WNT2;RBM24;TTN
TEAD4 (human)	4/1354	0.11159	0.333197	-0.827475	0.909413	RGS4;MEF2C;RELN;RBM24
MZF1 (human)	4/1389	0.119532	0.351956	-0.830546	0.867296	MYL7;CMYA5;RBM24;MYH6
CEBPB (human)	4/1420	0.126774	0.368164	-0.828683	0.828041	LRRN3;SMYD1;SLC8A1;TTN
ZNF354C (human)	4/1430	0.12915	0.369997	-1.02939	1.02349	RGS4;GUCY1A3;TECRL;MYH6
RELB (human)	4/1469	0.1386	0.391775	-0.792924	0.743024	POPDC2;UNC45B;MYL7;ACTN2
Pax2 (mouse)	4/1516	0.150361	0.394203	-0.870262	0.810117	MYL4;CSRP3;MYL7;WNT2
UBTF (human)	4/1493	0.144556	0.394203	-0.781405	0.727402	CSRP3;MYL7;ACTN2;SLC8A1
MIB2 (human)	4/1490	0.143805	0.394203	-0.729895	0.679452	ACTN2;CMYA5;WNT2;RBM24
ATF2 (human)	4/1517	0.150615	0.394203	-0.710208	0.661125	MYOM1;MEF2C;TGFB2;LUM
NFATC3 (human)	1/116	0.147575	0.394203	-0.623831	0.580718	MEF2C
RUNX1 (human)	714994	0.146304	0.394203	-0.585878	0.545388	ACTA2;GUCY1A3;MEF2C;RELN;VCAM1;LUM;MYL3;TTN
WT1 (human)	288330	0.155321	0.401562	-0.571813	0.521719	MYL4;RELN;MYL7;MYL3;RBM24;MYH6
HOXD9 (human)	4/1543	0.157293	0.401565	-0.683332	0.623462	MEF2C;MYOCD;LRRN3;TBX5
IRF8 (human)	4/1550	0.159111	0.401565	-0.674448	0.615357	MEF2C;RELN;VCAM1;SLC8A1
SOX10 (human)	1/139	0.173981	0.433928	-0.650204	0.54284	LUM
SPI1 (human)	4/1638	0.182632	0.45021	-0.721861	0.576075	MYOCD;TGFB2;FILIP1;RBM24
TFAP2A (mouse)	4/1663	0.189528	0.461839	-0.58755	0.453905	MYOCD;APOBEC2;RBM24;MYH6
NFKB1 (human)	583476	0.192701	0.464233	-0.461416	0.354076	ACTA2;UNC45B;MEF2C;MYOCD;TNNT2;TBX5;TMEM71
HIF1A (mouse)	3/1124	0.197081	0.46945	-0.667767	0.504961	FILIP1;TBX5;TECRL
HOXA5 (human)	401920	0.220443	0.497232	-0.700666	0.489554	GUCY1A3;MYOM1;ACTN2;FILIP1;WNT2;SLC8A1
MAPK14 (human)	3/1190	0.220471	0.497232	-0.598123	0.417907	ACTA2;RGS4;MEF2C
REL (mouse)	4/1752	0.214764	0.497232	-0.546855	0.382086	MYL4;GUCY1A3;SMYD1;TTN
Stat3 (mouse)	4/1762	0.217661	0.497232	-0.518678	0.362399	RGS4;MEF2C;PLN;TMEM71
JUN (human)	393155	0.215087	0.497232	-0.463386	0.323767	CSRP3;APOBEC2;LRRN3;MYH6;SLC8A1;TTN
SRF (mouse)	4/1782	0.22349	0.498736	-0.484906	0.337339	VCAM1;LUM;TECRL;SLC8A1
FOXD1 (human)	1/192	0.231833	0.511964	-0.677102	0.453321	RGS4
FOXA3 (human)	1/207	0.247476	0.540876	-0.619296	0.380597	PLN
EIF4EBP1 (human)	1/212	0.252622	0.546488	-0.572236	0.34577	TTN
SPIB (human)	2/760	0.278031	0.594667	-0.71608	0.372186	RBM24;BMP5
LOC135440 (human)	1/247	0.287692	0.594667	-0.558391	0.290226	UNC45B
NKX2-8 (human)	1/256	0.296448	0.594667	-0.496703	0.258163	RGS4
HMGA1 (human)	3/1379	0.290182	0.594667	-0.477972	0.248428	RGS4;ACTA2;POPDC2
AHR (human)	3/1391	0.294697	0.594667	-0.466355	0.24239	MYOCD;MEF2C;TNNT2
ZBTB7A (human)	3/1373	0.287927	0.594667	-0.45065	0.234227	GUCY1A3;MYOCD;RBM24
NR5A1 (human)	3/1389	0.293944	0.594667	-0.434775	0.225976	RGS4;UNC45B;SLC8A1
ATF4 (human)	3/1398	0.297333	0.594667	-0.395791	0.205714	MEF2C;MYH6;TTN
SP1 (human)	3/1406	0.300349	0.595084	-0.410735	0.213193	RELN;TNNT2;RBM24
FOXO3A (human)	2/813	0.304916	0.598538	-0.486288	0.249595	TGFB2;SMYD1
E2F4 (human)	1/270	0.309861	0.599014	-0.505845	0.259231	MYOCD
THRA (human)	1/271	0.310809	0.599014	-0.448583	0.229886	ANKRD1
TP63 (human)	3/1443	0.314324	0.60033	-0.382728	0.195296	MYOCD;MYL7;ACTN2
CREB1 (mouse)	2/849	0.323103	0.607456	-0.386544	0.192682	RGS4;CMYA5
PRDM1 (human)	3/1468	0.323786	0.607456	-0.321517	0.160268	RGS4;CMYA5;SLC8A1
ELF3 (human)	3/1488	0.331362	0.610858	-0.262707	0.129486	APOBEC2;ACTN2;TMEM71
TFAP2C (human)	3/1485	0.330225	0.610858	-0.250606	0.123522	MYOCD;ACTN2;MYH6
MIR133B (human)	3/1500	0.335909	0.613902	-0.27796	0.135622	ACTA2;APOBEC2;CMYA5
SMARCA2 (human)	3/1536	0.349549	0.626762	-0.285071	0.133182	MYOCD;TNNT2;TTN
TP53 (human)	352947	0.351815	0.626762	-0.0906521	0.0423516	RGS4;UNC45B;MYL7;TTN;TMEM71
PITX2 (human)	594768	0.348011	0.626762	-0.0668158	0.0312155	MYL7;LUM;ACTN2;SMYD1;TECRL;TBX5
TEAD2 (mouse)	3/1591	0.370358	0.648892	-0.211335	0.0914001	MYL3;WNT2;RBM24
NR3C1 (human)	3/1590	0.36998	0.648892	-0.186028	0.080455	GUCY1A3;MYH6;SLC8A1
REL (human)	1/353	0.38441	0.664719	-0.36286	0.148189	ACTA2
NFIC (human)	914385	0.393584	0.664719	-0.148677	0.0607183	GUCY1A3;SMPX;LUM;TECRL;TBX5;RBM24;TTN
NR5A1 (mouse)	2/1020	0.407611	0.664719	-0.141234	0.0576786	MYL3;MYH6
TBX5 (mouse)	3/1663	0.397462	0.664719	-0.116841	0.0477168	GUCY1A3;LRRN3;MYH6
RELA (mouse)	3/1656	0.394837	0.664719	-0.10806	0.0441306	TGFB2;RBM24;BMP5
STAT1 (human)	3/1667	0.398961	0.664719	-0.101303	0.0413713	CSRP3;ACTN2;WNT2
IKZF1 (mouse)	3/1674	0.401583	0.664719	-0.0636907	0.0260107	MYOM1;SMYD1;RBM24
ETS1 (mouse)	3/1681	0.404202	0.664719	-0.0574954	0.0234806	POPDC2;MYL4;MYL3
E2F1 (mouse)	422343	0.405249	0.664719	0.0529023	-0.0216048	GUCY1A3;MYOCD;MEF2C;ACTN2;SMYD1
FOS (mouse)	3/1708	0.414278	0.670435	-0.0170725	0.00682609	VCAM1;FILIP1;TTN
LEF1 (mouse)	3/1730	0.422455	0.678489	-0.00287384	0.00111472	POPDC2;CSRP3;ANKRD1
HMGA1 (mouse)	3/1748	0.429121	0.682416	-0.00915358	0.00349773	RGS4;MYL4;TNNT2
POU2F2 (mouse)	3/1754	0.431338	0.682416	-0.00254464	0.00097235	RGS4;MYL7;LUM
ETV4 (mouse)	3/1773	0.438341	0.688357	0.0262037	-0.00978569	LRRN3;TTN;BMP5
Sox2 (mouse)	3/1797	0.447145	0.69702	-0.0189169	0.00682789	POPDC2;FILIP1;TTN
BRCA1 (human)	3/1809	0.451529	0.698717	-0.168458	0.0603937	RGS4;MYOCD;C6ORF186
SOX10 (mouse)	1/451	0.462373	0.705849	-0.130047	0.0453024	TECRL
NFYA (human)	237135	0.462797	0.705849	0.110363	-0.0384454	GUCY1A3;MEF2C;VCAM1;LUM
HNF4A (mouse)	1/461	0.469765	0.711359	-0.107957	0.0367678	CSRP3
SRY (human)	1/469	0.475608	0.715098	-0.208987	0.0700809	MEF2C
Myb (mouse)	791	0.485058	0.724171	0.0941501	-0.0303848	MYL4;VCAM1;FILIP1
PURA (human)	1/492	0.492058	0.729484	-0.0743718	0.0234582	RBM24
NFE2 (human)	285347	0.503272	0.740929	0.211775	-0.0635008	CSRP3;MYL7;TBX5;MYH6
Nkx2-5 (mouse)	1/515	0.508005	0.742738	-0.055776	0.0165885	APOBEC2
ARNT (human)	2/1303	0.53573	0.767195	0.0559121	-0.0148175	MYL3;WNT2
MYC (human)	2/1302	0.53531	0.767195	0.0821648	-0.0217748	ACTN2;TNNT2
SP3 (human)	2/1332	0.547814	0.767195	0.114901	-0.0304505	RELN;RBM24
MIR138 (human)	2/1356	0.557656	0.767195	0.122744	-0.0325288	MYL4;CSRP3
PCBP1 (human)	2/1360	0.559283	0.767195	0.15824	-0.0419359	RELN;RBM24
E2F6 (human)	2/1358	0.55847	0.767195	0.188447	-0.0499409	MYOCD;RBM24
SREBF2 (human)	2/1361	0.559689	0.767195	0.190471	-0.0504773	UNC45B;MYL7
ETS2 (human)	2/1341	0.551522	0.767195	0.192059	-0.0508982	POPDC2;RGS4
CBEPA (human)	2/1366	0.561714	0.767195	0.195507	-0.0518122	TBX5;TMEM71
APEX1 (human)	2/1373	0.56454	0.767195	0.202534	-0.0536742	MYOM1;MYL7
TCFAP2A (human)	2/1367	0.562119	0.767195	0.208637	-0.0552917	RELN;RBM24
Prrx2 (mouse)	111460	0.587344	0.793101	0.190242	-0.0440991	GUCY1A3;MEF2C;VCAM1
USF1 (human)	2/1441	0.591338	0.793441	0.23967	-0.0554539	ACTN2;TNNT2
KLF13 (human)	2/1453	0.595945	0.794593	0.27999	-0.0643768	UNC45B;WNT2
TEAD2 (human)	2/1486	0.60842	0.806157	0.288576	-0.0621815	RELN;RBM24
ZFHX3 (human)	2/1504	0.615106	0.809288	0.291759	-0.0617363	RGS4;CSRP3
ESR1 (human)	2/1513	0.618418	0.809288	0.310917	-0.0657901	MYOCD;SMYD1
ZBTB16 (human)	2/1572	0.639611	0.831887	0.320681	-0.0590241	TGFB2;RELN
CBFB (human)	1/774	0.657114	0.840229	0.227832	-0.0396611	SMYD1
FOXA1 (mouse)	2/1705	0.684115	0.840229	0.404461	-0.0704089	MYL4;SLC8A1
CACYBP (mouse)	2/1656	0.668242	0.840229	0.41571	-0.0723671	MYL7;SMYD1
MYOD1 (mouse)	2/1672	0.673492	0.840229	0.418393	-0.0728342	MYL7;TNNT2
NRF1 (mouse)	2/1676	0.674794	0.840229	0.429446	-0.0747583	APOBEC2;TECRL
NFYB (mouse)	2/1748	0.697549	0.840229	0.460572	-0.0801768	RGS4;TTN
POU2F1 (mouse)	2/1735	0.693536	0.840229	0.465802	-0.0810871	RGS4;LUM
YY1 (mouse)	2/1700	0.682523	0.840229	0.466027	-0.0811263	MYL4;TNNT2
ELK1 (mouse)	2/1727	0.691045	0.840229	0.478398	-0.0832799	POPDC2;MYL3
NFYA (mouse)	2/1748	0.697549	0.840229	0.47924	-0.0834265	RGS4;TTN
STAT5B (mouse)	2/1729	0.69167	0.840229	0.486476	-0.0846861	POPDC2;TNNT2
CPEB1 (mouse)	2/1748	0.697549	0.840229	0.500062	-0.0870512	RGS4;TTN
NR5A2 (mouse)	2/1748	0.697549	0.840229	0.509908	-0.0887651	MYH6;TTN
ARID3A (mouse)	2/1893	0.739522	0.870589	0.467651	-0.0648097	CSRP3;FILIP1
HNF1A (human)	2/1855	0.729009	0.870589	0.545828	-0.0756439	MEF2C;TGFB2
CREB1 (human)	310152	0.737277	0.870589	0.66577	-0.0922661	TNNT2;MYL3;TMEM71
RELA (human)	319648	0.743286	0.870589	0.692678	-0.0959951	ACTA2;UNC45B;MEF2C
PPARG (human)	613700	0.73649	0.870589	0.7245	-0.100405	TGFB2;MYL7;CMYA5;SMYD1
CRTC3 (human)	1/1008	0.753293	0.872667	0.483498	-0.065853	MEF2C
MAX (human)	12451	0.750488	0.872667	0.589347	-0.0802699	ACTN2;TNNT2
RORB (human)	1/1035	0.762532	0.878569	0.517197	-0.0669567	ANKRD1
NR2F1 (human)	1/1073	0.774966	0.884062	0.536368	-0.0660956	ANKRD1
THRB (human)	48976	0.775639	0.884062	0.657662	-0.0810424	MYOCD;MYH6
USF1 (mouse)	1/1219	0.817107	0.924785	0.609168	-0.0476331	TGFB2
CACYBP (human)	1/1350	0.848303	0.924785	0.640113	-0.0500529	MYH6
FOXF2 (human)	1/1379	0.854474	0.924785	0.669167	-0.0523247	MYOCD
RARA (human)	1/1379	0.854474	0.924785	0.672873	-0.0526145	ACTN2
NR1I2 (human)	1/1387	0.856132	0.924785	0.676842	-0.0529248	MYOCD
RXRA (human)	1/1422	0.863175	0.924785	0.686487	-0.053679	SMYD1
MTF1 (human)	1/1440	0.866665	0.924785	0.712262	-0.0556945	WNT2
MYOG (human)	1/1404	0.859596	0.924785	0.721809	-0.056441	POPDC2
KLF5 (human)	1/1445	0.867619	0.924785	0.734035	-0.057397	MYL7
PITX1 (human)	1/1448	0.868189	0.924785	0.75767	-0.0592451	MYL7
FOXA1 (human)	1/1457	0.869882	0.924785	0.773156	-0.060456	SMYD1
REPIN1 (human)	1/1466	0.871554	0.924785	0.775656	-0.0606515	MEF2C
CBEPB (mouse)	502270	0.839471	0.924785	0.782015	-0.0611487	MYL4;LRRN3;TECRL
FOXJ1 (human)	1/1484	0.874836	0.924785	0.791115	-0.0618603	MYL4
CEBPD (human)	1/1495	0.876801	0.924785	0.807175	-0.0631161	MYL7
HIF1A (human)	1/1586	0.891946	0.931491	0.813405	-0.0577264	MYOCD
SMAD4 (mouse)	1/1580	0.891006	0.931491	0.865875	-0.0614501	TECRL
EGR1 (mouse)	1/1617	0.896679	0.931843	0.908826	-0.0641547	WNT2
SREBF1 (mouse)	1/1735	0.912917	0.935485	0.893519	-0.0595886	RGS4
NR3C1 (mouse)	1/1775	0.917835	0.935485	0.900517	-0.0600553	FILIP1
POU1F1 (mouse)	1/1754	0.915287	0.935485	0.935612	-0.0623958	ACTN2
MYOG (mouse)	1/1675	0.904998	0.935485	0.949729	-0.0633372	POPDC2
HNF4A (human)	82912	0.950927	0.964577	1.00223	-0.0361461	MYL7
TFAP2A (human)	625694	0.965828	0.970405	0.982642	-0.0295203	MIR208A;RBM24
SP1 (mouse)	168013	0.965248	0.970405	1.0319	-0.031	RELN
SREBF1 (human)	250924	0.975245	0.975245	1.07441	-0.0269313	MYL7

## Sheet: Cluster 10
Term	Overlap	P-value	Adjusted P-value	Z-score	Combined Score	Genes
PGR (human)	27/1447	1.05124e-09	3.00654e-07	-1.74402	26.1904	ZBTB20;PPP1R3A;PYGM;ERBB4;RASSF5;TNNI1;BCO2;CCDC141;PPARGC1A;TGM2;NIPSNAP3B;TMOD1;POSTN;MBNL2;ANGPT1;CNTN5;KCNIP4;SORBS2;FRMD4B;C6ORF142;KBTBD10;CACNB2;CCDC80;PALLD;FAM70A;RBMS3;MYH7
POU1F1 (human)	25/1408	1.27692e-08	1.826e-06	-1.73266	22.8943	CLIC5;SYNPO2;TSHZ2;ZBTB20;PPP1R3A;NCALD;LMOD2;C1ORF105;CYSLTR2;MECOM;MB;DPF3;CTNNA3;BCO2;A2M;POSTN;KCNIP4;SORBS2;MITF;DCN;KBTBD10;TRDN;COL3A1;PALLD;TRIM55
TCF4 (human)	45/4210	5.3581e-08	5.10806e-06	-1.49538	18.2208	RYR2;CASZ1;SEMA3C;ZAK;SYNPO2;TSHZ2;LMOD1;NEXN;ZBTB20;HTR4;ABRA;CRHBP;EDNRA;CYSLTR2;C7;ERBB4;MB;TNNI1;DPF3;FSD2;CTNNA3;CCDC141;A2M;PPARGC1A;TMOD1;GABRP;EPHA7;MBNL2;ANGPT1;CNTN5;NEBL;SORBS2;NPNT;FBXO32;C6ORF142;DCN;CACNB2;ACTC1;MAB21L2;MSRB3;ITGB1BP2;ZFPM2;PDZRN3;CCDC60;RBMS3
GATA1 (human)	34/2679	8.08268e-08	5.77912e-06	-1.60858	19.4016	CHRM2;SYNPO2;ITGB3;LMOD1;ZBTB20;CACNA1C;HTR4;FBXO40;CYSLTR2;PCDP1;MB;ERBB4;DPF3;CCDC141;MYOZ2;PPARGC1A;CORIN;TGM2;NIPSNAP3B;TMOD1;GABRP;POSTN;GALNT5;ADPRHL1;KCNIP4;KLHDC1;SORBS2;MITF;FBXO32;COL3A1;MAB21L2;ITGB1BP2;FAM70A;CCDC60
TBP (human)	32/2486	1.58126e-07	9.04481e-06	-1.55351	18.0414	RYR2;SYNPO2;TSHZ2;NEXN;PPP1R3A;PYGM;PLAT;HTR4;ABRA;NCALD;CYSLTR2;RASSF5;OLFML1;SLIT3;CTNNA3;A2M;PPARGC1A;POSTN;EPHA7;MBNL2;CNTN5;KCNIP4;SORBS2;MITF;DCN;KBTBD10;CACNB2;SYNPO2L;MAB21L2;MSRB3;FAM70A;CCDC60
CBEPA (human)	22/1366	5.53781e-07	2.63969e-05	-1.67365	17.644	FHOD3;ABCD2;MBNL2;ANGPT1;SEMA3C;NEBL;TNNC1;SORBS2;MITF;CACNA1C;TRDN;ACTC1;ERBB4;RASSF5;OLFML1;CTNNA3;ZFPM2;PPARGC1A;CCDC60;CRYAB;RBMS3;GCOM1
ETS2 (human)	21/1341	1.60805e-06	6.57003e-05	-1.6195	15.5965	GABRP;CLIC5;POSTN;CNTN5;KCNH7;KLHDC1;ZBTB20;MITF;HTR4;C6ORF142;DCN;KLHL31;CACNB2;C1ORF105;CYSLTR2;ACTC1;SLIT3;CTNNA3;ASB2;HCN1;RBMS3
CBEPB (human)	30/2598	3.92614e-06	0.000140359	-1.55623	13.8058	CLIC5;ZBTB20;NCALD;LMOD2;MECOM;C7;CTNNA3;FSD2;BCO2;A2M;PPARGC1A;MYOZ2;CORIN;EPHA7;ANGPT1;NEBL;KCNIP4;SORBS2;MITF;ABCA8;NPNT;C6ORF142;DCN;KBTBD10;CACNB2;COL3A1;SYNPO2L;MAB21L2;TRIM55;GCOM1
GATA6 (human)	21/1447	5.17852e-06	0.000164562	-1.62494	14.1568	TMOD1;CLIC5;GABRP;CASZ1;MBNL2;KCNH7;ITGB3;ZBTB20;SORBS2;PPP1R3A;MITF;ABCA8;C6ORF142;DCN;NCALD;KLHL31;CYSLTR2;C7;MB;CTNNA3;RBMS3
FOXF1 (human)	20/1352	6.76998e-06	0.000176019	-1.63502	14.1346	TMOD1;ENPEP;MBNL2;ANGPT1;SEMA3C;LAMA4;ZBTB20;MITF;NCALD;KBTBD10;CACNB2;C1ORF105;SYNPO2L;MECOM;C7;MB;NPPA;TNNI1;PPARGC1A;TRIM55
LEF1 (human)	43/4658	6.50393e-06	0.000176019	-1.37807	11.9133	CHRM2;CLIC5;ZAK;SYNPO2;ITGB3;TSHZ2;HSPB7;ZBTB20;CACNA1D;PPP1R3A;PYGM;PLAT;CACNA1C;HTR4;ABRA;MYLK3;CRHBP;C1ORF105;CYSLTR2;MECOM;PCDP1;MB;RASSF5;TNNI1;XIRP1;CCDC141;A2M;GALNT5;POSTN;EPHA7;MBNL2;NEBL;ACSL1;KCNIP4;MITF;CACNB2;CCDC80;SYNPO2L;PDE3A;ASB2;CCDC60;HCN1;GCOM1
HMGA1 (human)	20/1379	9.0128e-06	0.000214805	-1.62414	13.7171	CLIC5;EPHA7;KLHL14;LRRC39;LMOD1;ZBTB20;PPP1R3A;MITF;DCN;KLHL31;COL3A1;CYSLTR2;PCDP1;PALLD;CTNNA3;PPARGC1A;CCDC60;TRIM55;CORIN;RBMS3
MYB (human)	20/1409	1.22764e-05	0.000270081	-1.6069	13.2035	CLIC5;POSTN;MBNL2;SEMA3C;ZAK;HSPB8;KCNIP4;TSHZ2;ZBTB20;SORBS2;ABCA8;C6ORF142;DCN;KBTBD10;LMOD2;PALLD;HAND2;CTNNA3;TRIM55;FAM19A4
MEF2A (human)	29/2800	4.48475e-05	0.000916171	-1.47467	10.3158	TSHZ2;PPP1R3A;PLAT;MYLK3;NCALD;KLHL31;C1ORF105;CYSLTR2;MECOM;PCDP1;XIRP1;CTNNA3;BCO2;A2M;MYBPC3;TMOD1;GABRP;GALNT5;KCNIP4;SORBS2;MITF;NPNT;DCN;TRDN;CACNB2;SYNPO2L;PALLD;PDE3A;FAM70A
SPI1 (human)	20/1638	9.89545e-05	0.00188673	-1.64789	10.3371	ABCD2;KLHL14;LMOD1;PPP1R3A;LDB3;MITF;MYLK3;KBTBD10;KLHL31;CACNB2;CYSLTR2;ACTC1;SYNPO2L;MB;OLFML1;DPF3;A2M;PDZRN3;FAM70A;HCN1
GATA2 (human)	68/9985	0.000165878	0.00296507	-1.58086	9.20197	FHOD3;CHRM2;CLIC5;ABCD2;ZAK;HSPB8;HSPB7;LMOD1;ZBTB20;PYGM;LDB3;HTR4;KLHL31;CYSLTR2;FGF9;SLN;MB;RASSF5;NPPA;FAM19A4;TGM2;EPHA7;ADPRHL1;TNNC1;MITF;FRMD4B;DCN;CACNB2;CCDC80;PALLD;ITGB1BP2;ZFPM2;PDZRN3;CRYAB;TRIM55;ENPEP;CASZ1;KLHL14;SEMA3C;SYNPO2;TSHZ2;NEXN;CACNA1D;MIRLET7A2;FBXO40;C1ORF105;PCDP1;ERBB4;OLFML1;XIRP1;IGFBP7;SLIT3;BCO2;PPARGC1A;NIPSNAP3B;CNTN5;KCNIP4;SORBS2;PRSS35;FBXO32;SGPP2;FGF16;AC…
NFE2 (human)	26/2681	0.000338999	0.00570316	-1.4319	7.39823	HSPB7;PYGM;LDB3;CRIP2;HTR4;ENO3;MYLK3;KLHL31;MB;RASSF5;GALNT5;ADPRHL1;ANGPT1;CNTN5;ACSL1;NEBL;KCNIP4;SORBS2;NPNT;FBXO32;KBTBD10;ACTC1;PALLD;HRC;TRIM55;MYH7
TEAD1 (human)	18/1547	0.000404186	0.00642207	-1.52984	7.72266	MBNL2;ANGPT1;NEBL;TNNC1;TSHZ2;SORBS2;PRSS35;MITF;PLAT;C6ORF142;DCN;KBTBD10;MB;RASSF5;OLFML1;A2M;FAM19A4;MYH7
HNF1A (human)	20/1855	0.000496648	0.00747587	-1.4814	7.25306	CNTN5;SEMA3C;NEBL;KCNIP4;TSHZ2;SORBS2;NPNT;ENO3;KLHL31;CRHBP;EDNRA;C1ORF105;CYSLTR2;CTNNA3;BCO2;A2M;PPARGC1A;CCDC60;TRIM55;RBMS3
YY1 (human)	45/6042	0.000712121	0.00969841	-1.43116	6.63457	CHRM2;CLIC5;ABCD2;SYNPO2;LAMA4;ZBTB20;PPP1R3A;PYGM;LDB3;HTR4;NCALD;LMOD2;C1ORF105;CYSLTR2;FGF9;SLN;TNNI1;FSD2;PGM5;SLIT3;CTNNA3;A2M;MYOZ2;PPARGC1A;FAM19A4;POSTN;KLHDC1;SORBS2;PRSS35;MITF;ABCA8;FBXO32;NPNT;DCN;KBTBD10;MIRLET7C;CACNB2;COL3A1;CCDC80;PALLD;CORO6;MSRB3;MASP1;TRIM55;MYH7
NFKB1 (mouse)	29/3284	0.000678883	0.00969841	-1.29784	6.01652	CASZ1;HSPB8;ITGB3;LRRC39;LMOD1;NEXN;CACNA1C;ENO3;CRHBP;RASSF5;S1PR1;TNNI1;CTNNA3;SLIT3;BCO2;FAM19A4;EPHA7;NKX2-6;CKM;ACSL1;TNNC1;DCN;CCDC80;HAND2;PDE3A;HRC;FAM70A;CRYAB;RBMS3
FOXL1 (human)	43/5755	0.000930827	0.0121008	-1.58941	7.01641	CHRM2;ABCD2;ENPEP;KLHL14;SEMA3C;ZAK;ITGB3;TSHZ2;ZBTB20;MIRLET7A2;NCALD;KLHL31;EDNRA;C1ORF105;CYSLTR2;SLN;MB;FSD2;CTNNA3;A2M;CCDC141;FAM19A4;CORIN;TGM2;POSTN;EPHA7;KCNH7;NEBL;KCNIP4;SORBS2;MITF;DCN;KBTBD10;TRDN;CACNB2;COL3A1;MIR145;PALLD;PDE3A;MSRB3;FAM70A;CCDC60;CRYAB
CRTC3 (human)	13/1008	0.00109337	0.0135958	-1.53728	6.60721	CNTN5;SEMA3C;ITGB3;TSHZ2;ZBTB20;PPP1R3A;TRDN;CACNB2;COL3A1;PALLD;FAM70A;MYOZ2;CORIN
STAT3 (human)	25/2759	0.00119209	0.0142058	-1.3079	5.56393	SYNPO2;CACNA1D;CRIP2;CRHBP;EDNRA;ERBB4;RASSF5;OLFML1;XIRP1;SLIT3;CTNNA3;TMOD1;ANGPT1;NEBL;KCNIP4;MITF;FRMD4B;KBTBD10;COL3A1;HAND2;MAB21L2;MASP1;ZFPM2;PDZRN3;FAM70A
ZBTB16 (human)	17/1572	0.00131067	0.0144174	-1.42619	6.04606	TMOD1;RYR2;KLHDC1;ZBTB20;SORBS2;HTR4;C6ORF142;CACNB2;C7;MB;PALLD;RASSF5;OLFML1;CTNNA3;A2M;ZFPM2;PPARGC1A
SRF (human)	29/3420	0.00128511	0.0144174	-1.29442	5.48747	CLIC5;KLHL14;SYNPO2;ZBTB20;PPP1R3A;LDB3;ABRA;NCALD;FBXO40;MECOM;ERBB4;NPPA;DPF3;FSD2;CCDC141;PPARGC1A;POSTN;GALNT5;CNTN5;ACSL1;NEBL;KLHDC1;SORBS2;C6ORF142;DCN;TRDN;ACTC1;ITGB1BP2;ASB2
GATA3 (human)	23/2505	0.00162194	0.0171806	-1.37249	5.57776	TMOD1;CLIC5;SEMA3C;KLHL14;KCNH7;NEBL;HSPB8;HSPB7;SORBS2;MITF;FRMD4B;FBXO32;HTR4;NCALD;KLHL31;CYSLTR2;ACTC1;MECOM;MB;BCO2;CCDC141;CCDC60;MYOZ2
NFAT2 (human)	15/1376	0.00236028	0.0241086	-1.3979	5.20745	NIPSNAP3B;CLIC5;POSTN;ITGB3;HSPB8;ZBTB20;C6ORF142;NCALD;TRDN;CRHBP;C1ORF105;PCDP1;MSRB3;CTNNA3;CCDC141
PURA (human)	8/492	0.00260681	0.0257086	-1.52291	5.57526	CLIC5;FBXO40;CACNB2;CRHBP;MECOM;NEBL;LAMA4;MYH7
POU2F2 (human)	24/2792	0.00302282	0.0288175	-1.27837	4.53408	ENPEP;EPHA7;SEMA3C;NEBL;SYNPO2;LAMA4;KCNIP4;ZBTB20;MITF;FRMD4B;HTR4;DCN;NCALD;CACNB2;COL3A1;PALLD;RASSF5;MAB21L2;MSRB3;CTNNA3;PPARGC1A;TRIM55;CORIN;GCOM1
JUN (human)	25/2976	0.00332146	0.0297702	-1.2452	4.37594	HSPB8;ZBTB20;LDB3;ENO3;NCALD;KLHL31;MB;RASSF5;XIRP1;DPF3;GALNT5;ANGPT1;CNTN5;KCNH7;NEBL;MITF;FRMD4B;C6ORF142;DCN;KBTBD10;CACNB2;PALLD;MASP1;ASB2;TRIM55
NR5A2 (human)	30/3815	0.00333093	0.0297702	-1.16209	4.08388	CASZ1;EPAS1;ITGB3;TSHZ2;NEXN;PPP1R3A;LDB3;KLHL31;FBXO40;EDNRA;PCDP1;MB;OLFML1;NPPA;DPF3;ACSL1;NEBL;MITF;FBXO32;KBTBD10;CACNB2;COL3A1;PALLD;HAND2;MAB21L2;ITGB1BP2;MASP1;ASB2;FAM70A;GCOM1
FOXC1 (human)	78/13142	0.00391953	0.0339693	-1.41737	4.79396	FHOD3;CHRM2;CLIC5;RYR2;DPY19L2P1;ITGB3;LRRC39;LMOD1;ZBTB20;PYGM;LDB3;HTR4;CRHBP;EDNRA;MECOM;SLN;FGF9;MB;MYOZ2;TGM2;TMOD1;EPHA7;MBNL2;NKX2-6;KCNH7;ACSL1;MITF;FRMD4B;NPNT;DCN;TRDN;MIRLET7C;CACNB2;SYNPO2L;PALLD;HAND2;ZFPM2;TRIM55;RBMS3;CASZ1;KLHL14;SEMA3C;EPAS1;LAMA4;TSHZ2;CACNA1D;LOC643837;MIRLET7A2;NCALD;FBXO40;C7;PCDP1;OLFML1;S1PR1;XIRP1;FSD2;CTNNA3;BCO2;A2M;CCDC141;PPARGC1A;CORIN;GALNT5;CNTN5;NE…
UBTF (human)	15/1493	0.00500279	0.0420823	-1.33296	4.223	TMOD1;GABRP;ANGPT1;CNTN5;ADPRHL1;NEBL;SYNPO2;HSPB7;LMOD1;PLAT;HTR4;CACNB2;PALLD;RASSF5;MSRB3
ETS1 (human)	35/4827	0.00541367	0.0439898	-1.29677	4.05083	CHRM2;CASZ1;DPY19L2P1;LRRC39;TSHZ2;NEXN;ZBTB20;PPP1R3A;PYGM;CACNA1C;NCALD;FBXO40;FGF9;RASSF5;OLFML1;S1PR1;SLIT3;CTNNA3;MYOZ2;TGM2;GABRP;GALNT5;KCNIP4;SORBS2;PRSS35;MITF;NPNT;SGPP2;TRDN;CACNB2;COL3A1;ACTC1;PALLD;HAND2;HCN1
HNF4A (human)	19/2127	0.00569099	0.0439898	-1.23666	3.86308	TMOD1;ENPEP;EPHA7;MBNL2;TSHZ2;ZBTB20;SORBS2;CACNA1C;CACNB2;C7;SYNPO2L;MB;ERBB4;PALLD;MSRB3;CTNNA3;A2M;PDZRN3;FAM70A
EBF1 (mouse)	2022-02-01	0.00568154	0.0439898	-0.466201	1.45632	FGF9;PRSS35
LOC135440 (human)	5/247	0.00694131	0.0509029	-1.39561	4.15588	FGF9;XIRP1;TNNI1;LDB3;MYLK3
POU2F1 (human)	14/1399	0.00687909	0.0509029	-1.26699	3.7729	TMOD1;SEMA3C;NEBL;KCNIP4;ZBTB20;SORBS2;HTR4;MYLK3;NCALD;RASSF5;CTNNA3;BCO2;ZFPM2;CORIN
IRF2 (human)	14/1412	0.00743051	0.0531282	-1.26805	3.72178	ABCD2;GALNT5;ANGPT1;LRRC39;PYGM;MITF;LMOD2;KLHL31;MECOM;C7;PALLD;NPPA;BCO2;FAM19A4
HINFP (human)	24/3047	0.00884624	0.061708	-1.08941	3.03439	GABRP;MBNL2;CNTN5;EPAS1;TSHZ2;KCNIP4;HSPB7;ZBTB20;CACNA1D;CRIP2;ABCA8;ENO3;DCN;KBTBD10;COL3A1;CCDC80;PCDP1;SLN;PALLD;CORO6;BCO2;ZFPM2;TRIM55;TGM2
ATF2 (human)	14/1517	0.0132939	0.0876861	-1.19799	2.91589	SEMA3C;ITGB3;MITF;CACNA1C;ABCA8;NPNT;ENO3;NCALD;KLHL31;MB;MSRB3;ITGB1BP2;ZFPM2;RBMS3
STAT1 (human)	15/1667	0.012966	0.0876861	-1.1926	2.90277	EPHA7;CKM;CNTN5;ZAK;KCNIP4;ZBTB20;CRIP2;MITF;FRMD4B;NPNT;NCALD;COL3A1;HAND2;CRYAB;RBMS3
MYOG (mouse)	15/1675	0.0134902	0.0876861	-1.14117	2.77759	NIPSNAP3B;MYBPC3;CKM;KCNH7;LAMA4;KCNIP4;MITF;LDB3;ACTC1;MECOM;MB;CORO6;MAPRE3;MYH7;RBMS3
HOXA5 (human)	23/3000	0.0140362	0.089208	-1.32697	3.20699	TMOD1;CLIC5;ENPEP;NKX2-6;NEBL;KCNIP4;LRRC39;KLHDC1;ZBTB20;MITF;FRMD4B;C6ORF142;SGPP2;DCN;NCALD;CRHBP;MECOM;CORO6;S1PR1;MSRB3;MASP1;FAM19A4;GCOM1
JUND (human)	13/1380	0.0144615	0.089913	-1.19241	2.8724	POSTN;SEMA3C;KLHL14;KCNIP4;ZBTB20;SORBS2;MITF;HTR4;KBTBD10;LMOD2;C1ORF105;BCO2;PPARGC1A
NFIA (human)	13/1416	0.0174964	0.106467	-1.17356	2.62867	MBNL2;TSHZ2;PYGM;LDB3;CRIP2;ABCA8;ACTC1;MB;RASSF5;NPPA;MASP1;BCO2;CRYAB
ZNF354C (human)	13/1430	0.0187995	0.109727	-1.35675	2.99809	CHRM2;CKM;KLHL14;TSHZ2;PRSS35;NPNT;DCN;NCALD;FBXO40;CACNB2;C1ORF105;MB;ITGB1BP2
Myb (mouse)	16/1902	0.0184961	0.109727	-1.1057	2.44333	NIPSNAP3B;CHRM2;CLIC5;NEBL;NEXN;PRSS35;SGPP2;LMOD2;KBTBD10;FGF16;CACNB2;HAND2;IGFBP7;MAPRE3;CPEB2;RBMS3
EIF4EBP1 (human)	4/212	0.0193147	0.11048	-1.26576	2.78836	CHRM2;GALNT5;CYSLTR2;TSHZ2
SREBF1 (human)	20/2587	0.0201358	0.112919	-1.01304	2.20953	NIPSNAP3B;CHRM2;ENPEP;ACSL1;NEBL;CACNA1D;PYGM;NCALD;CACNB2;ACTC1;MECOM;SLN;PALLD;RASSF5;NPPA;MAPRE3;BCO2;ASB2;FAM70A;FAM19A4
SOX2 (human)	1945-02-01	0.0207399	0.11407	-0.575463	1.2493	ACSL1;OLFML1
TEAD2 (human)	13/1486	0.0247591	0.133606	-1.07799	2.16985	FHOD3;CKM;KCNIP4;HSPB7;CRIP2;CACNA1C;ENO3;MECOM;ERBB4;RASSF5;HRC;PDE3A;GCOM1
MIR138 (human)	12/1356	0.0282611	0.146957	-1.08059	2.07216	GABRP;ABCD2;ACTC1;CNTN5;MECOM;ADPRHL1;ACSL1;HSPB7;SORBS2;A2M;CRYAB;MYLK3
MYOD1 (mouse)	14/1672	0.0278737	0.146957	-0.99813	1.91403	MYBPC3;ADPRHL1;SEMA3C;KCNH7;KLHDC1;PYGM;CACNA1D;ENO3;MECOM;MB;S1PR1;IGFBP7;CTNNA3;ZFPM2
Arnt (mouse)	3/139	0.0297379	0.148258	-1.12836	2.15381	TSHZ2;PRSS35;NCALD
APEX1 (human)	12/1373	0.0306714	0.148258	-1.05865	2.02076	MYBPC3;TMOD1;CACNB2;SYNPO2L;NEBL;MB;PALLD;ZAK;HSPB8;BCO2;FBXO32;HTR4
STAT5B (human)	12/1379	0.0315567	0.148258	-1.00243	1.91344	CRHBP;ABCD2;CASZ1;POSTN;ANGPT1;PALLD;KCNIP4;MITF;FRMD4B;C6ORF142;GCOM1;KLHL31
USF1 (mouse)	11/1219	0.0310745	0.148258	-0.994689	1.89866	MYBPC3;CRHBP;CKM;MB;OLFML1;KCNIP4;HRC;CTNNA3;ASB2;CCDC141;TGM2
KLF11 (human)	12/1388	0.0329191	0.148258	-0.967959	1.84764	ADPRHL1;KCNH7;MB;RASSF5;HSPB7;CORO6;PGM5;LDB3;CRIP2;ASB2;ENO3;CRYAB
MZF1 (human)	12/1389	0.0330731	0.148258	-0.945209	1.80422	FHOD3;ACTC1;PCDP1;NEBL;EPAS1;RASSF5;HRC;CRIP2;FBXO32;ENO3;CRYAB;MYH7
IRF8 (human)	13/1550	0.0331766	0.148258	-0.930863	1.77683	CLIC5;SYNPO2;ITGB3;KLHDC1;MECOM;PCDP1;PALLD;RASSF5;MAB21L2;PDE3A;ITGB1BP2;PPARGC1A;TRIM55
PPARG (human)	25/3580	0.0297686	0.148258	-0.870037	1.66073	NEXN;PYGM;CRIP2;NCALD;CRHBP;CYSLTR2;C7;ERBB4;RASSF5;OLFML1;XIRP1;CTNNA3;TMOD1;NEBL;KCNIP4;SORBS2;MITF;FRMD4B;CACNB2;SYNPO2L;PALLD;MAB21L2;MASP1;FAM70A;PDZRN3
FOXM1 (human)	1958-02-01	0.032643	0.148258	-0.600347	1.14594	CACNB2;CORIN
BCL6 (human)	12/1399	0.0346414	0.152422	-0.885433	1.66559	COL3A1;POSTN;EPHA7;GALNT5;MBNL2;RASSF5;HAND2;SYNPO2;KCNIP4;MAB21L2;ZBTB20;SORBS2
NKX3-1 (human)	4/264	0.038286	0.164062	-1.13518	2.05184	NEBL;PALLD;A2M;DCN
NFIC (human)	29/4403	0.0384342	0.164062	-0.882405	1.59495	SEMA3C;ITGB3;ZBTB20;HTR4;NCALD;LMOD2;MECOM;PCDP1;MB;DPF3;SLIT3;FSD2;BCO2;TGM2;GALNT5;MBNL2;CNTN5;ADPRHL1;NEBL;KCNIP4;SORBS2;FBXO32;SGPP2;TRDN;PALLD;MAPRE3;ITGB1BP2;ASB2;GCOM1
IRF8 (mouse)	14/1770	0.0418199	0.17589	-0.815807	1.41779	CHRM2;CASZ1;KCNH7;ITGB3;TSHZ2;KCNIP4;LDB3;PRSS35;DCN;CYSLTR2;DPF3;CTNNA3;BCO2;RBMS3
PITX2 (human)	24/3528	0.0430063	0.178258	-0.700492	1.20801	CASZ1;EPHA7;MBNL2;HSPB8;ZBTB20;SORBS2;ABCA8;C6ORF142;NCALD;TRDN;FBXO40;MECOM;C7;PCDP1;SYNPO2L;MB;OLFML1;NPPA;IGFBP7;ITGB1BP2;BCO2;FAM70A;TRIM55;FAM19A4
BRCA1 (human)	14/1809	0.0485646	0.188576	-1.01908	1.70009	EPAS1;LMOD1;ZBTB20;LDB3;MITF;CACNA1C;ABCA8;MECOM;SLN;MB;IGFBP7;CCDC141;ZFPM2;PDZRN3
PRDM1 (human)	12/1468	0.0469415	0.188576	-0.865095	1.4432	FBXO40;EDNRA;KLHL14;PALLD;S1PR1;ZBTB20;CACNA1C;NPNT;C6ORF142;CORIN;RBMS3;GCOM1
RELB (human)	12/1469	0.0471395	0.188576	-0.843721	1.40754	FHOD3;CLIC5;GABRP;ERBB4;RASSF5;S1PR1;PRSS35;CRIP2;CACNA1C;HTR4;CORIN;KLHL31
KLF4 (human)	12/1485	0.0503861	0.188576	-0.796932	1.32948	ADPRHL1;KCNH7;MB;RASSF5;HSPB7;CORO6;PGM5;LDB3;CRIP2;ASB2;ENO3;CRYAB
TP53 (human)	20/2866	0.0507706	0.188576	-0.637879	1.06414	FHOD3;CASZ1;TNNC1;NEXN;CACNA1D;PRSS35;FRMD4B;CACNA1C;NPNT;FBXO32;MYLK3;CACNB2;COL3A1;CYSLTR2;MECOM;HAND2;RASSF5;PPARGC1A;FAM70A;FAM19A4
Pax4 (mouse)	2016-10-01	0.0506325	0.188576	5.58309	-9.314	PRSS35
Pax5 (mouse)	2016-10-01	0.0506325	0.188576	5.69548	-9.50149	PRSS35
Pou5f1 (mouse)	2016-10-01	0.0506325	0.188576	5.82249	-9.71338	PRSS35
IKZF1 (mouse)	13/1674	0.0550817	0.197009	-0.68421	1.11151	GABRP;NKX2-6;ADPRHL1;CNTN5;HSPB8;TSHZ2;LDB3;NCALD;TRDN;EDNRA;SYNPO2L;FAM70A;CRYAB
T (mouse)	2016-11-01	0.0551073	0.197009	5.15704	-8.37765	PRSS35
Evi1 (mouse)	2016-11-01	0.0551073	0.197009	5.27799	-8.57414	PRSS35
Pax2 (mouse)	12/1516	0.0571079	0.200406	-0.857358	1.37813	FBXO40;ACTC1;CKM;KCNH7;KCNIP4;ZBTB20;PRSS35;MAPRE3;PPARGC1A;CCDC60;ABRA;RBMS3
MAPK14 (human)	10/1190	0.0575626	0.200406	-0.75028	1.20601	ENPEP;SYNPO2L;NEBL;HSPB7;ZBTB20;DPF3;MAPRE3;MITF;TRIM55;TRDN
PPARG::RXRA (mouse)	2016-12-01	0.0595611	0.200406	4.65167	-7.47714	PRSS35
GABPA (mouse)	2016-12-01	0.0595611	0.200406	4.88826	-7.85744	PRSS35
Spz1 (mouse)	2016-12-01	0.0595611	0.200406	4.99152	-8.02343	PRSS35
JUN (mouse)	13/1699	0.0604783	0.200708	-0.591708	0.950225	MYBPC3;POSTN;CASZ1;NEXN;MITF;LDB3;PPP1R3A;FBXO32;NCALD;MECOM;MB;PGM5;CRYAB
FOXA2 (human)	1983-02-01	0.0610547	0.200708	-0.325257	0.522332	TMOD1;SLN
FOXA1 (mouse)	13/1705	0.061825	0.200861	-0.628701	1.00915	ENPEP;POSTN;ABCD2;ADPRHL1;CNTN5;LDB3;CACNA1C;DCN;CACNB2;PDE3A;PDZRN3;MYOZ2;FAM19A4
FOS (mouse)	13/1708	0.0625059	0.200861	-0.545373	0.875399	CLIC5;CASZ1;ANGPT1;TNNC1;KCNIP4;LDB3;SGPP2;ENO3;OLFML1;XIRP1;PGM5;MAPRE3;MYOZ2
AHR (human)	11/1391	0.0673201	0.213928	-0.644035	0.993175	MYBPC3;EDNRA;SEMA3C;MB;TNNC1;ITGB3;SLIT3;SORBS2;LDB3;FRMD4B;GCOM1
SND1 (mouse)	1990-02-01	0.0701024	0.220322	-0.246791	0.373312	NKX2-6;RASSF5
SMAD4 (mouse)	12/1580	0.0728455	0.226455	-0.528604	0.785088	TMOD1;FGF9;HRC;MITF;CACNA1D;IGFBP7;SLIT3;CACNA1C;ASB2;CPEB2;PDZRN3;HCN1
SRY (human)	5/469	0.0740047	0.226545	-0.850297	1.26253	MBNL2;ACSL1;HSPB7;CORO6;KBTBD10
CRTC1 (human)	9/1086	0.0744588	0.226545	-0.579619	0.860625	CHRM2;COL3A1;PALLD;LRRC39;ZBTB20;FBXO32;FAM70A;NCALD;TRDN
NR3C1 (human)	12/1590	0.0755365	0.227405	-0.499497	0.739767	FBXO40;CLIC5;ACTC1;ACSL1;PALLD;SYNPO2;HRC;MITF;ASB2;RBMS3;GCOM1;MYH7
FOXA3 (human)	3/207	0.0772378	0.227732	-0.619296	0.916302	CLIC5;KLHDC1;MYLK3
Lhx3 (mouse)	2016-01-01	0.0771692	0.227732	4.47746	-6.62478	PRSS35
Tcfcp2l1 (mouse)	2017-01-01	0.0815198	0.237905	4.27785	-6.14249	PRSS35
FOXA1 (human)	11/1457	0.0865301	0.247476	-0.49543	0.691839	ENPEP;MBNL2;SYNPO2L;MB;PALLD;LAMA4;TNNI1;FRMD4B;NCALD;KBTBD10;RBMS3
Tal1::Gata1 (mouse)	2018-01-01	0.0858501	0.247476	4.0846	-5.7039	PRSS35
SP3 (mouse)	9/1129	0.0894312	0.253241	-0.481001	0.660613	NIPSNAP3B;EPAS1;LRRC39;PDE3A;MITF;CRYAB;DCN;NCALD;CORIN
SOX9 (human)	2/105	0.090812	0.25463	-0.275966	0.377506	MECOM;KBTBD10
FOXO3A (human)	7/813	0.0933638	0.257078	-0.550228	0.747417	ENPEP;MBNL2;SYNPO2L;MB;TNNI1;FRMD4B;NCALD
FOXJ1 (human)	11/1484	0.0952807	0.257078	-0.401929	0.54597	TMOD1;CACNB2;GALNT5;SYNPO2L;ADPRHL1;SLIT3;SORBS2;CTNNA3;FBXO32;KLHL31;TRDN
NFYA (human)	17/2549	0.0952306	0.257078	-0.327156	0.444401	POSTN;GALNT5;CNTN5;KCNIP4;ZBTB20;SORBS2;NCALD;C1ORF105;MECOM;PCDP1;RASSF5;HRC;DPF3;MAPRE3;FSD2;ITGB1BP2;BCO2
Mycn (mouse)	2020-01-01	0.09445	0.257078	4.15794	-5.64804	PRSS35
Hand1::Tcfe2a (mouse)	2/110	0.0980702	0.262132	-0.170485	0.228264	CNTN5;PRSS35
SPI1 (mouse)	12/1680	0.10264	0.271806	-0.31619	0.411891	CLIC5;GABRP;EPAS1;MB;ITGB3;TSHZ2;PDE3A;MAPRE3;FRMD4B;HTR4;PPARGC1A;SGPP2
EGR1 (human)	6/681	0.106606	0.27972	-0.45852	0.58414	KCNH7;EPAS1;PDE3A;CORO6;CRIP2;CACNA1D
IRF2 (mouse)	12/1706	0.111442	0.289748	-0.311382	0.385722	CACNB2;FBXO40;CLIC5;EPHA7;EPAS1;MAB21L2;MITF;CACNA1D;PPP1R3A;MYOZ2;DCN;RBMS3
RORB (human)	8/1035	0.120047	0.309309	-0.41357	0.485288	EDNRA;ERBB4;KCNIP4;KLHDC1;SORBS2;PLAT;FRMD4B;DCN
NR5A1 (human)	10/1389	0.124574	0.318109	-0.319798	0.366284	FBXO40;COL3A1;ENPEP;KCNIP4;NPPA;PDE3A;SORBS2;MITF;HTR4;NCALD
FOS (human)	10/1394	0.126661	0.320575	-0.337696	0.384177	ANGPT1;PCDP1;SEMA3C;NEBL;RASSF5;ZBTB20;SORBS2;MITF;CCDC60;KBTBD10
MZF1_1-4 (human)	17/2705	0.140314	0.340082	-0.403048	0.434714	GABRP;TNNC1;LRRC39;KLHDC1;PYGM;ABCA8;ENO3;PGM5P2;MECOM;SYNPO2L;FGF9;PALLD;OLFML1;NPPA;HRC;MAPRE3;CTNNA3
PPARA (human)	3/271	0.139622	0.340082	-0.390974	0.421691	TMOD1;PALLD;LDB3
NR2F1 (human)	8/1073	0.138695	0.340082	-0.36897	0.397959	EDNRA;ERBB4;KCNIP4;KLHDC1;SORBS2;PLAT;FRMD4B;DCN
THRA (human)	3/271	0.139622	0.340082	-0.368706	0.397674	ERBB4;SORBS2;FRMD4B
CEBPB (human)	10/1420	0.137819	0.340082	-0.30798	0.332177	ANGPT1;ADPRHL1;KCNH7;NEBL;XIRP1;CCDC141;CCDC60;HCN1;GCOM1;MYH7
KLF13 (human)	10/1453	0.152711	0.36702	-0.228338	0.228873	GABRP;MB;KLHDC1;MAB21L2;XIRP1;CACNA1D;LDB3;CRIP2;CRYAB;DCN
RELA (mouse)	11/1656	0.163039	0.387601	-0.158667	0.150381	FGF16;CRHBP;CACNB2;CASZ1;TSHZ2;PDE3A;PGM5;CTNNA3;CACNA1C;CCDC141;NCALD
RELA (human)	17/2775	0.163985	0.387601	-0.0898881	0.0851941	MYBPC3;GABRP;MBNL2;CNTN5;LDB3;PLAT;CACNA1C;ENO3;FBXO40;MECOM;PALLD;RASSF5;S1PR1;XIRP1;FSD2;PDZRN3;GCOM1
ARNT (human)	9/1303	0.166762	0.390933	-0.263396	0.247386	CHRM2;ANGPT1;MB;ACSL1;NEBL;PDE3A;SLIT3;FSD2;SORBS2
JDP2 (human)	10/1488	0.169368	0.393815	-0.194046	0.180827	CACNB2;C1ORF105;CNTN5;SLN;NEBL;PALLD;DPF3;MITF;FRMD4B;FAM19A4
EWSR1-FLI1 (human)	1939-01-01	0.172247	0.39728	2.07166	-1.91238	CACNB2
HNF4A (mouse)	4/461	0.177137	0.405291	-0.297016	0.26825	ANGPT1;PLAT;CACNA1D;DCN
POU3F1 (human)	2/162	0.180993	0.410825	-0.0567944	0.0505237	CLIC5;S1PR1
Klf4 (mouse)	2/163	0.182682	0.410923	-0.0873436	0.077679	PRSS35;HCN1
SP4 (human)	1942-01-01	0.18391	0.410923	2.31584	-2.05959	MYH7
ARID3A (mouse)	12/1893	0.187147	0.413073	-0.187107	0.165427	ENPEP;CNTN5;EPAS1;FSD2;PRSS35;CACNA1C;MASP1;PPARGC1A;PDZRN3;FAM19A4;CORIN;TRIM55
Zfx (mouse)	1943-01-01	0.187761	0.413073	2.15253	-1.90311	PRSS35
RBPJ (human)	10/1535	0.193058	0.416348	-0.0762198	0.0667864	TMOD1;ANGPT1;PCDP1;SYNPO2L;KCNH7;RASSF5;CORO6;MSRB3;CACNA1D;MITF
SMAD4 (human)	10/1542	0.196709	0.416348	-0.0503821	0.0441465	CHRM2;SEMA3C;LAMA4;PDE3A;XIRP1;SORBS2;FSD2;FRMD4B;PPARGC1A;TRDN
FEV (human)	2/172	0.197984	0.416348	-0.0393099	0.0344447	CACNB2;COL3A1
TAL1::TCF3 (human)	1945-01-01	0.195408	0.416348	1.82255	-1.59698	SLIT3
HNF1B (mouse)	1944-01-01	0.191593	0.416348	2.17769	-1.90817	PRSS35
NME2 (human)	1945-01-01	0.195408	0.416348	2.21686	-1.94249	CORO6
POU2F1 (mouse)	11/1735	0.200669	0.418914	0.0236896	-0.0206121	GABRP;COL3A1;MBNL2;ZBTB20;NEXN;FSD2;CTNNA3;CACNA1C;BCO2;DCN;TRDN
NR5A2 (mouse)	11/1748	0.207211	0.429438	0.0412449	-0.0348634	MYBPC3;FGF16;CKM;ADPRHL1;MB;ACSL1;LRRC39;CORO6;CRIP2;SGPP2;GCOM1
RORB (mouse)	7/1020	0.21114	0.429841	-0.0095447	0.00805898	MYBPC3;CRHBP;GALNT5;ANGPT1;SYNPO2;ZBTB20;KBTBD10
NR2F1 (mouse)	7/1021	0.211812	0.429841	-0.00831281	0.00701885	MYBPC3;CRHBP;GALNT5;ANGPT1;SYNPO2;ZBTB20;KBTBD10
JUND (mouse)	11/1764	0.215391	0.429841	0.0891107	-0.0752398	NKX2-6;SYNPO2L;MECOM;RASSF5;KCNIP4;ZBTB20;FSD2;MASP1;BCO2;A2M;CPEB2
Stat3 (mouse)	11/1762	0.214361	0.429841	0.104397	-0.0881464	CHRM2;RYR2;EDNRA;ABCD2;NKX2-6;MECOM;CNTN5;MAB21L2;S1PR1;PRSS35;SLIT3
AP1 (mouse)	2/183	0.216886	0.429841	0.123025	-0.103875	GABRP;PRSS35
NFKB1 (human)	20/3497	0.216257	0.429841	0.257985	-0.217827	MYBPC3;GABRP;ABCD2;ENPEP;KLHL14;ACSL1;EPAS1;SORBS2;PLAT;HTR4;ENO3;CACNB2;CRHBP;MECOM;PALLD;RASSF5;MAB21L2;XIRP1;FSD2;GCOM1
TBX5 (human)	1951-01-01	0.217926	0.429841	2.17189	-1.83382	NPPA
TEAD2 (mouse)	10/1591	0.223101	0.431128	0.118531	-0.099726	CRHBP;CACNB2;MECOM;KLHL14;RASSF5;TNNI1;ZFPM2;NPNT;FAM70A;NCALD
ETV4 (human)	9/1403	0.222122	0.431128	0.11862	-0.0998009	NIPSNAP3B;CKM;FGF9;KLHDC1;ZBTB20;CTNNA3;ASB2;HTR4;MYH7
ZNF148 (human)	10/1591	0.223101	0.431128	0.153401	-0.129064	ADPRHL1;MB;KCNIP4;HSPB7;CORO6;CACNA1D;CRIP2;ASB2;ENO3;CRYAB
RUNX1 (mouse)	1953-01-01	0.225292	0.43244	2.10467	-1.76437	PRSS35
SAMD9L (human)	9/1415	0.229213	0.437032	0.131933	-0.109207	CACNB2;ANGPT1;FGF9;PALLD;TNNI1;CRIP2;FRMD4B;ASB2;FBXO32
FOXA2 (mouse)	9/1441	0.244864	0.463783	0.183798	-0.141219	ABCD2;ANGPT1;KCNH7;PDE3A;S1PR1;CTNNA3;PRSS35;FRMD4B;LMOD2
Pdx1 (mouse)	6/907	0.26137	0.479011	0.0623677	-0.0459046	KCNH7;KCNIP4;ZBTB20;MITF;PRSS35;FBXO32
Sox5 (mouse)	5/728	0.264188	0.479011	0.0781309	-0.0575068	TMOD1;ACTC1;DPF3;PRSS35;BCO2
Arnt::Ahr (mouse)	2/207	0.258578	0.479011	0.182282	-0.134166	TNNI1;PRSS35
REPIN1 (human)	9/1466	0.260261	0.479011	0.210749	-0.155118	CASZ1;CNTN5;KCNH7;EPAS1;KCNIP4;DPF3;PGM5;FBXO32;NCALD
FOXF1 (mouse)	2/206	0.256834	0.479011	0.238224	-0.175341	ITGB3;CCDC141
CACYBP (mouse)	10/1656	0.260144	0.479011	0.278463	-0.204958	EDNRA;CYSLTR2;KLHL14;KCNIP4;PDE3A;LMOD1;MSRB3;IGFBP7;CCDC60;CRYAB
SND1 (human)	9/1473	0.264628	0.479011	0.289459	-0.213051	CRHBP;GABRP;MBNL2;ACSL1;ITGB3;KCNIP4;XIRP1;ENO3;KLHL31
Esrrb (mouse)	1965-01-01	0.268065	0.482179	1.85216	-1.35104	PRSS35
Nkx3-2 (mouse)	7/1122	0.28338	0.488404	0.227786	-0.163234	EDNRA;HRC;CRIP2;PRSS35;CACNA1C;MASP1;ABRA
HIVEP1 (human)	2/218	0.27776	0.488404	0.291033	-0.208558	MBNL2;KCNIP4
HIF1A (mouse)	7/1124	0.284859	0.488404	0.310778	-0.222707	CCDC80;SORBS2;ZFPM2;PPARGC1A;RBMS3;TGM2;GCOM1
ELF3 (human)	9/1488	0.274066	0.488404	0.316737	-0.226977	CACNB2;ENPEP;CKM;FGF9;MB;CRIP2;CTNNA3;ASB2;MYOZ2
MIR133B (human)	9/1500	0.281689	0.488404	0.325446	-0.233219	ADPRHL1;MB;ERBB4;PALLD;RASSF5;MAB21L2;CACNA1D;HTR4;KLHL31
ZFHX3 (human)	9/1504	0.284244	0.488404	0.343497	-0.246154	CHRM2;CACNB2;COL3A1;ENPEP;ANGPT1;SYNPO2L;TSHZ2;SORBS2;FAM19A4
MIB2 (human)	9/1490	0.275332	0.488404	0.356194	-0.255253	ANGPT1;ADPRHL1;RASSF5;HRC;FRMD4B;HTR4;ENO3;NCALD;GCOM1
MIR210 (human)	1970-01-01	0.285187	0.488404	1.90425	-1.36461	FSD2
SMAD3 (mouse)	1972-01-01	0.291924	0.496966	1.83049	-1.27994	TGM2
En1 (mouse)	6/957	0.301824	0.507001	0.294129	-0.199785	MB;LAMA4;TSHZ2;PRSS35;CTNNA3;NCALD
SMARCA2 (human)	9/1536	0.304909	0.507001	0.420291	-0.28548	CACNB2;C1ORF105;ACTC1;CNTN5;ERBB4;HSPB8;MAB21L2;LDB3;NPNT
ELK1 (mouse)	10/1727	0.302781	0.507001	0.478398	-0.324948	TMOD1;FGF16;ACTC1;KCNIP4;CTNNA3;SGPP2;ABRA;CORIN;TGM2;MYH7
LEF1 (mouse)	10/1730	0.304624	0.507001	0.494815	-0.3361	GALNT5;ABCD2;CKM;NEBL;NPPA;LMOD1;PLAT;BCO2;DCN;TGM2
GTF2I (human)	2/237	0.310802	0.507939	0.444115	-0.300841	SYNPO2L;PLAT
CACYBP (human)	8/1350	0.309985	0.507939	0.449036	-0.304174	FHOD3;KCNH7;MB;HSPB7;CORO6;CRIP2;ASB2;CRYAB
RBPJ (mouse)	10/1735	0.307702	0.507939	0.508905	-0.34473	SYNPO2L;SEMA3C;ACSL1;XIRP1;MSRB3;PLAT;CTNNA3;ASB2;PDZRN3;FAM19A4
NCOA1 (human)	1979-01-01	0.315011	0.511894	1.75664	-1.17632	MECOM
ESR2 (human)	1980-01-01	0.318248	0.514231	1.61753	-1.07579	CRHBP
CREB1 (human)	15/2749	0.321512	0.516586	0.652803	-0.431185	SYNPO2;ZBTB20;MITF;PLAT;KLHL31;FBXO40;CACNB2;CRHBP;EDNRA;SLN;MB;FSD2;MAPRE3;ASB2;PPARGC1A
ZNF281 (human)	6/986	0.325828	0.519219	0.450994	-0.295595	FHOD3;KCNIP4;HSPB7;CACNA1D;CRYAB;NCALD
SP1 (mouse)	13/2360	0.326781	0.519219	0.648432	-0.425002	TMOD1;KLHL14;KCNH7;ACSL1;TNNC1;CACNA1D;CRIP2;PLAT;CACNA1C;RASSF5;CORO6;SLIT3;CPEB2
ETV4 (mouse)	10/1773	0.331338	0.52355	0.599642	-0.388042	COL3A1;CYSLTR2;ANGPT1;ITGB3;KCNIP4;PPP1R3A;SLIT3;ITGB1BP2;PPARGC1A;SGPP2
NR1H3 (human)	8/1385	0.334649	0.525877	0.549388	-0.353085	CACNB2;ABCD2;C7;PALLD;XIRP1;NEXN;IGFBP7;PYGM
USF2 (human)	20/3792	0.338198	0.528551	0.811506	-0.51743	ANGPT1;CNTN5;ADPRHL1;KCNIP4;ZBTB20;CACNA1D;MITF;FRMD4B;MYLK3;NCALD;CACNB2;CRHBP;ACTC1;MECOM;RASSF5;ASB2;CCDC60;TRIM55;HCN1;TGM2
NKX2-8 (human)	2/256	0.343535	0.533973	0.568993	-0.356992	CACNA1D;CORIN
NFATC3 (mouse)	10/1801	0.348991	0.539521	0.656228	-0.404941	ABCD2;CYSLTR2;MECOM;SLN;MAB21L2;CACNA1C;CCDC141;NPNT;SGPP2;CORIN
NR5A1 (mouse)	6/1020	0.354302	0.544787	0.562729	-0.341779	EPAS1;HSPB8;CORO6;CRIP2;SORBS2;ASB2
E2F4 (human)	2/270	0.367345	0.558987	0.550027	-0.319911	ZAK;S1PR1
RUNX1 (human)	20/3857	0.367446	0.558987	0.849005	-0.493805	CHRM2;GALNT5;ANGPT1;CNTN5;HSPB7;ZBTB20;SORBS2;CRIP2;NCALD;MECOM;PCDP1;SLN;ERBB4;DPF3;PGM5;FSD2;ITGB1BP2;BCO2;FAM19A4;TGM2
MTF1 (human)	8/1440	0.374013	0.565966	0.635166	-0.36155	CACNB2;MECOM;ANGPT1;FGF9;NEXN;NPNT;ABRA;RBMS3
IRF7 (human)	1999-01-01	0.376939	0.567393	1.62168	-0.919014	CYSLTR2
CBEPB (mouse)	17/3275	0.38221	0.572314	0.820097	-0.45767	ANGPT1;MITF;SORBS2;PPP1R3A;KBTBD10;TRDN;COL3A1;CCDC80;CYSLTR2;MECOM;PALLD;MAB21L2;SLIT3;CPEB2;FAM70A;MYOZ2;CORIN
RUNX2 (human)	8/1458	0.386995	0.574593	0.683667	-0.378815	TMOD1;CLIC5;CACNB2;ACSL1;ZBTB20;IGFBP7;ITGB1BP2;GCOM1
TBX5 (mouse)	9/1663	0.389759	0.574593	0.761107	-0.421724	MYBPC3;EDNRA;GALNT5;EPAS1;PALLD;LAMA4;NPPA;HSPB7;CRYAB
TFAP2A (mouse)	9/1663	0.389759	0.574593	0.76574	-0.424291	CKM;MECOM;RASSF5;HSPB7;PGM5;LDB3;CPEB2;ENO3;NCALD
GLI2 (human)	8/1465	0.392052	0.575009	0.74595	-0.412786	CASZ1;MB;PALLD;RASSF5;HAND2;ZBTB20;CACNA1D;CRIP2
NR1H2 (human)	3/479	0.397037	0.579349	0.596333	-0.325508	C7;XIRP1;MAPRE3
ETS1 (mouse)	9/1681	0.401988	0.580649	0.821755	-0.446714	FGF16;GABRP;ADPRHL1;CRIP2;ZFPM2;PDZRN3;FAM19A4;NCALD;MYH7
RORA_1 (human)	1/107	0.400125	0.580649	1.52268	-0.827743	CORIN
TFAP2C (human)	8/1485	0.406511	0.581311	0.853817	-0.463169	CACNB2;RYR2;ADPRHL1;ACSL1;RASSF5;KCNIP4;TSHZ2;CACNA1C
MYOD1 (human)	1/109	0.405786	0.581311	1.58444	-0.859508	FBXO32
ELK1 (human)	8/1511	0.425312	0.602174	0.8351	-0.423571	MECOM;CKM;PALLD;ITGB3;SLIT3;PRSS35;PLAT;NCALD
NFATC3 (human)	1/116	0.425186	0.602174	1.51252	-0.767164	NCALD
NFATC2 (human)	1/117	0.427906	0.602862	1.53681	-0.777727	PYGM
TFAP2D (human)	7/1324	0.438283	0.614455	0.830788	-0.40461	ENPEP;SYNPO2L;XIRP1;NEXN;IGFBP7;MAPRE3;KBTBD10
SP3 (human)	7/1332	0.444464	0.619526	0.842756	-0.403512	FHOD3;ACSL1;CORO6;CRIP2;CACNA1D;CACNA1C;ENO3
HOXD9 (human)	8/1543	0.448398	0.619526	0.911742	-0.436543	POSTN;PCDP1;MB;PALLD;KCNIP4;CRYAB;MYLK3;HCN1
HMGA1 (mouse)	9/1748	0.447532	0.619526	0.914556	-0.43789	CASZ1;COL3A1;MBNL2;CYSLTR2;ACTC1;OLFML1;ZBTB20;ZFPM2;ENO3
CEBPE (human)	1/127	0.45441	0.624813	1.48485	-0.69833	FAM70A
CBEPA (mouse)	9/1764	0.458371	0.627244	0.918645	-0.428474	NKX2-6;CNTN5;ERBB4;SYNPO2;HSPB8;BCO2;SGPP2;CPEB2;TRDN
TEAD4 (human)	7/1354	0.461405	0.62839	0.957648	-0.444918	FHOD3;ERBB4;ACSL1;TNNC1;HAND2;CACNA1D;ENO3
PLAU (human)	7/1362	0.467541	0.633729	0.918782	-0.419088	CACNB2;SYNPO2;MITF;CACNA1C;ENO3;PPARGC1A;LMOD2
Prrx2 (mouse)	2205-11-01	0.474286	0.639838	0.897875	-0.400937	CHRM2;KCNIP4;DPF3;MITF;FSD2;PRSS35;FBXO32;ASB2;CORIN;TRDN;LMOD2
RARA (human)	7/1379	0.480528	0.641342	0.957084	-0.42513	XIRP1;NEXN;IGFBP7;SORBS2;PYGM;MAPRE3;BCO2
NR1I2 (human)	7/1387	0.486613	0.641342	0.998501	-0.443527	C7;PALLD;XIRP1;NEXN;IGFBP7;SORBS2;BCO2
E2F1 (mouse)	15/3056	0.482105	0.641342	1.14529	-0.508728	NIPSNAP3B;EPHA7;KLHL14;SEMA3C;CNTN5;EPAS1;FGF16;MECOM;FGF9;RASSF5;HAND2;TNNI1;CTNNA3;CORIN;HCN1
SOX10 (human)	1/139	0.48461	0.641342	1.48411	-0.65923	MITF
Nr2e3 (mouse)	1/139	0.48461	0.641342	1.48418	-0.659263	PRSS35
REL (human)	2/353	0.500042	0.651219	0.940801	-0.403518	GABRP;CNTN5
CBFB (human)	4/774	0.500938	0.651219	0.944342	-0.405037	TMOD1;ZAK;IGFBP7;PLAT
MYOG (human)	7/1404	0.499477	0.651219	1.04393	-0.447749	TMOD1;CACNB2;KCNIP4;HSPB7;MSRB3;PRSS35;CCDC60
TP63 (human)	7/1443	0.528603	0.684074	1.01313	-0.384676	TMOD1;SYNPO2L;NEBL;KLHDC1;PYGM;FBXO32;NCALD
ELK4 (human)	7/1453	0.535973	0.690487	1.0798	-0.399911	MECOM;KCNIP4;SORBS2;PDZRN3;NCALD;TGM2;MYH7
FOXO3A (mouse)	3/597	0.53952	0.691941	0.947417	-0.348891	CNTN5;LAMA4;PDZRN3
TFAP2A (human)	17/3613	0.549806	0.698865	1.16684	-0.418075	TMOD1;NEBL;ITGB3;KCNIP4;TSHZ2;CACNA1D;CRIP2;CACNA1C;NPNT;ENO3;FGF9;ERBB4;RASSF5;NPPA;ASB2;ZFPM2;HCN1
TBP (mouse)	15/3182	0.54766	0.698865	1.24755	-0.446994	POSTN;ANGPT1;KCNIP4;ZBTB20;MITF;CACNA1D;PPP1R3A;FRMD4B;DCN;KLHL31;COL3A1;FSD2;CTNNA3;PPARGC1A;RBMS3
STAT5B (mouse)	8/1729	0.577977	0.731422	1.18133	-0.369479	NIPSNAP3B;GABRP;EDNRA;MBNL2;PALLD;OLFML1;A2M;TRIM55
MYC (human)	6/1302	0.584869	0.736883	1.11663	-0.340936	EDNRA;ADPRHL1;EPAS1;ASB2;PPARGC1A;HCN1
POU2F2 (mouse)	8/1754	0.594407	0.745616	1.18395	-0.34754	COL3A1;MBNL2;CNTN5;FSD2;CTNNA3;CACNA1C;BCO2;TRDN
CREM (human)	3/662	0.609463	0.757854	1.05296	-0.291948	SYNPO2;ZBTB20;LMOD2
PRDM1 (mouse)	1/196	0.606886	0.757854	1.33201	-0.369319	RASSF5
Nobox (mouse)	1/201	0.616125	0.762821	1.33962	-0.362678	PRSS35
SOX10 (mouse)	2/451	0.632146	0.766075	1.1198	-0.298399	DPF3;MITF
Sox2 (mouse)	8/1797	0.621941	0.766075	1.17662	-0.313541	CRHBP;SLN;ANGPT1;CNTN5;PALLD;PRSS35;NPNT;TRDN
E2F6 (human)	6/1358	0.625972	0.766075	1.23074	-0.327962	FHOD3;CACNB2;ERBB4;RASSF5;TNNC1;CACNA1D
LTF (human)	6/1363	0.629529	0.766075	1.23388	-0.328798	ANGPT1;SEMA3C;RASSF5;NPPA;LDB3;NPNT
THRB (human)	2034-09-01	0.631443	0.766075	1.28234	-0.341712	CLIC5;CACNB2;GABRP;RYR2;CNTN5;KCNIP4;HRC;CACNA1D;ABRA
FOXI1 (human)	1/217	0.644266	0.777469	1.36539	-0.343685	FBXO32
SP1 (human)	6/1406	0.659317	0.792289	1.26153	-0.293722	CACNA1D;CRIP2;CACNA1C;ZFPM2;ENO3;CRYAB
Gata1 (mouse)	8/1863	0.662241	0.792472	1.36038	-0.316422	GABRP;MECOM;EPAS1;HSPB8;S1PR1;PRSS35;ENO3;HCN1
Sox17 (mouse)	2/500	0.687361	0.812335	1.15592	-0.240249	MITF;PRSS35
USF1 (human)	6/1441	0.682461	0.812335	1.30152	-0.270511	FBXO40;CKM;CACNA1D;ASB2;PPARGC1A;HCN1
NRF1 (mouse)	7/1676	0.685965	0.812335	1.36282	-0.283251	MB;HSPB7;TNNI1;ZBTB20;FRMD4B;CPEB2;MYH7
RXRA (mouse)	2/507	0.694673	0.817599	1.18063	-0.237759	ACTC1;CCDC141
SPIB (human)	3/760	0.700926	0.82048	1.18228	-0.233933	ERBB4;OLFML1;DCN
Nkx2-5 (mouse)	2/515	0.702858	0.82048	1.22839	-0.243058	PRSS35;MASP1
ATF1 (human)	1/264	0.715628	0.83199	1.38808	-0.255316	ADPRHL1
POU1F1 (mouse)	7/1754	0.73059	0.845946	1.4456	-0.241848	NIPSNAP3B;CLIC5;CNTN5;TSHZ2;CORO6;CACNA1D;HCN1
ELF5 (mouse)	2/556	0.742006	0.852264	1.21687	-0.194528	CNTN5;PRSS35
NR3C1 (mouse)	7/1775	0.741842	0.852264	1.40038	-0.223864	MYBPC3;GABRP;GALNT5;CYSLTR2;KCNIP4;ABRA;TRDN
XBP1 (human)	2/605	0.782973	0.881844	1.29431	-0.162746	SYNPO2;HSPB8
MZF1_5-13 (human)	1/316	0.778123	0.881844	1.33967	-0.16845	CTNNA3
PCBP1 (human)	5/1360	0.776151	0.881844	1.40317	-0.176434	EPAS1;CRIP2;CACNA1D;CACNA1C;ENO3
TCFAP2A (human)	5/1367	0.779955	0.881844	1.45128	-0.182483	CACNA1D;CRIP2;CACNA1C;FBXO32;ZFPM2
ZBTB7A (human)	5/1373	0.783176	0.881844	1.5038	-0.189087	CACNB2;FGF9;CACNA1D;CACNA1C;ZFPM2
RXRA (human)	5/1422	0.808154	0.9064	1.45918	-0.143401	C1ORF105;SYNPO2L;XIRP1;NEXN;MAPRE3
MYC (mouse)	6/1699	0.820989	0.917198	1.55001	-0.133969	FGF16;CACNA1D;PRSS35;HTR4;ENO3;FAM19A4
SREBF1 (mouse)	6/1735	0.835916	0.923325	1.54283	-0.123078	CYSLTR2;NPPA;IGFBP7;CTNNA3;ITGB1BP2;TRIM55
NFYB (mouse)	6/1748	0.841059	0.923325	1.54312	-0.123101	CYSLTR2;IGFBP7;CTNNA3;ITGB1BP2;MYOZ2;TRIM55
CPEB1 (mouse)	6/1748	0.841059	0.923325	1.55791	-0.12428	CYSLTR2;IGFBP7;CTNNA3;ITGB1BP2;MYOZ2;TRIM55
RUNX2 (mouse)	6/1750	0.841838	0.923325	1.61257	-0.128641	FHOD3;HSPB7;TNNI1;MASP1;BCO2;TRDN
REL (mouse)	6/1752	0.842615	0.923325	1.62125	-0.129334	CASZ1;SLN;LAMA4;OLFML1;CTNNA3;CACNA1C
HIF1A (human)	5/1586	0.875613	0.955822	1.56533	-0.0707268	CACNB2;PALLD;NPPA;PYGM;KBTBD10
AHR (mouse)	1/454	0.88542	0.958649	1.41849	-0.0599029	SYNPO2L
NRF1 (human)	4/1356	0.888259	0.958649	1.62171	-0.0684849	MAPRE3;NPNT;FAM70A;HCN1
EGR1 (mouse)	5/1617	0.885835	0.958649	1.68227	-0.0710423	FGF16;RYR2;EPAS1;CACNA1D;PRSS35
CREB1 (mouse)	2/849	0.912962	0.959953	1.63145	-0.0666786	PRSS35;HTR4
TCF3 (human)	4/1428	0.910375	0.959953	1.6542	-0.0676087	CACNB2;MYLK3;NCALD;TGM2
ATF4 (human)	4/1398	0.901674	0.959953	1.66422	-0.0680181	SYNPO2;MITF;CACNA1C;PPARGC1A
SNAI2 (human)	4/1428	0.910375	0.959953	1.66801	-0.0681732	CACNB2;MYLK3;NCALD;TGM2
SNAI1 (human)	4/1428	0.910375	0.959953	1.67991	-0.0686594	CACNB2;MYLK3;NCALD;TGM2
MAX (human)	1934-06-01	0.901416	0.959953	1.67998	-0.0686623	FHOD3;PALLD;CACNA1D;ASB2;ENO3;HCN1
YY1 (mouse)	5/1700	0.90976	0.959953	1.73693	-0.07099	MECOM;CTNNA3;HTR4;ZFPM2;CRYAB
NFYA (mouse)	5/1748	0.921517	0.965399	1.74121	-0.0613155	CYSLTR2;IGFBP7;CTNNA3;ITGB1BP2;TRIM55
SRF (mouse)	5/1782	0.929014	0.968715	1.73648	-0.0551938	POSTN;COL3A1;KCNIP4;SORBS2;CTNNA3
ESR1 (human)	4/1513	0.931457	0.968715	1.78899	-0.0568628	CACNB2;SYNPO2L;XIRP1;CTNNA3
TP53 (mouse)	3/1266	0.941577	0.975693	1.75124	-0.0430939	MB;LRRC39;MYH7
E2F1 (human)	14/4207	0.945998	0.976734	2.06547	-0.0486223	FHOD3;ACSL1;EPAS1;CACNA1D;CRIP2;SORBS2;MITF;PLAT;FRMD4B;CACNB2;CYSLTR2;MECOM;FGF9;FAM70A
IKZF1 (human)	3/1373	0.960269	0.987903	1.78147	-0.0216824	MYBPC3;CACNB2;HRC
KLF5 (human)	3/1445	0.969535	0.992433	1.78705	-0.0135741	FHOD3;CRIP2;MYH7
CEBPD (human)	3/1495	0.974733	0.992433	1.82078	-0.0138303	TMOD1;CACNB2;CTNNA3
WT1 (human)	2689-07-01	0.975083	0.992433	2.00586	-0.0152361	FHOD3;NEXN;CACNA1D;CRIP2;CACNA1C;ZFPM2;HCN1
SREBF2 (human)	2/1361	0.989403	0.999014	1.84734	-0.00182154	HAND2;MYLK3
PITX1 (human)	2/1448	0.992721	0.999014	1.86262	-0.00183661	CACNB2;ITGB1BP2
GFI1 (human)	1/1427	0.999014	0.999014	1.86944	-0.00184333	SYNPO2L
CRX (human)	1/1362	0.998639	0.999014	1.8758	-0.00184961	SYNPO2L
FOXF2 (human)	1/1379	0.998749	0.999014	1.91428	-0.00188754	SYNPO2L
